# Supplementary material for: Smed-pou4-2 regulates mechanosensory neuron regeneration and function in planarians
Source: bioRxiv preprint, doi:10.1101/2025.05.15.654132, version 2 (2025-09-11)
Supplement: Supplementary File S1 [file 654132_file02.xlsx]

## Sheet: Cl 0
	mean.read.count.in.complement.to.Cl.0	mean.read.count.in.Cl.0	fc	z	lfdr	symbol	species	description	primaryIdentifier
dd_Smed_v6_12_0	2.88442	13.6281	4.72472	14.4352	2.55321e-09	cib	Drosophila melanogaster	ciboulot	NP_525065.1
dd_Smed_v6_507_0	3.8149	9.79134	2.56661	14.0785	6.48777e-09
dd_Smed_v6_30_0	27.174	49.8349	1.83392	13.7447	2.23549e-08	EEF1A1	Homo sapiens	eukaryotic translation elongation factor 1 alpha 1	NP_001393.1
dd_Smed_v6_285_0	3.05798	7.50499	2.45423	12.4514	1.54577e-06	LOC102202864	Pundamilia nyererei	actin, cytoplasmic-like	XP_005754844.1
dd_Smed_v6_296_0	5.02845	10.3488	2.05804	11.9274	6.80998e-06	RPL7A	Homo sapiens	ribosomal protein L7a	NP_000963.1
dd_Smed_v6_756_0	4.85662	10.3719	2.13563	11.839	8.44907e-06	PIWIL1	Homo sapiens	piwi like RNA-mediated gene silencing 1	NP_004755.2
dd_Smed_v6_246_0	8.48561	20.2546	2.38694	11.7733	1.03047e-05	ACTB	Homo sapiens	actin, beta	NP_001092.1
dd_Smed_v6_35_0	5.93364	12.5586	2.11651	11.6489	1.38132e-05	YBX2	Homo sapiens	Y-box binding protein 2	NP_057066.2
dd_Smed_v6_15_0	17.0191	27.2625	1.60187	11.5892	1.62896e-05	HSPA8	Homo sapiens	heat shock protein family A (Hsp70) member 8	NP_006588.1
dd_Smed_v6_258_0	12.3308	25.3049	2.05217	11.5074	2.01335e-05	nd1	Dugesia japonica	NADH dehydrogenase subunit 1	YP_004936155.1
dd_Smed_v6_138_0	6.29172	12.7027	2.01896	11.3994	2.54284e-05	YWHAZ	Homo sapiens	tyrosine 3-monooxygenase/tryptophan 5-monooxygenase activation protein, zeta	NP_003397.1
dd_Smed_v6_420_0	1.78508	4.36771	2.44679	10.8797	8.2196e-05	CSK	Homo sapiens	c-src tyrosine kinase	NP_004374.1
dd_Smed_v6_850_0	2.07375	5.21467	2.51461	10.6399	0.000133145	LOC100122279	Nasonia vitripennis	lamin Dm0-like	XP_001605883.1
dd_Smed_v6_127_0	5.51473	10.4211	1.88969	10.6019	0.000143221	RPL3	Homo sapiens	ribosomal protein L3	NP_000958.1
dd_Smed_v6_211_0	2.70022	5.51138	2.04108	10.3513	0.000228948	Bm1	Brugia malayi	60S ribosomal protein L4	XP_001894323.1
dd_Smed_v6_473_0	1.639	3.87838	2.36632	10.2027	0.000300544	B52	Drosophila melanogaster	CG10851 gene product from transcript CG10851-RN	NP_788668.1
dd_Smed_v6_50_0	3.11649	5.83078	1.87094	10.0427	0.000394129	adt3	Ictalurus punctatus	ADP/ATP carrier protein 3	NP_001187478.1
dd_Smed_v6_133_0	2.78739	5.55806	1.994	9.8049	0.000593896	ACLA	Aspergillus clavatus NRRL 1	peptidyl-prolyl cis-trans isomerase/cyclophilin, putative	XP_001270773.1
dd_Smed_v6_108_0	3.4269	6.75486	1.97113	9.75887	0.000645868	RPL8	Homo sapiens	ribosomal protein L8	NP_000964.1
dd_Smed_v6_126_0	2.15834	4.53649	2.10184	9.69989	0.000712466	FAU	Homo sapiens	Finkel-Biskis-Reilly murine sarcoma virus (FBR-MuSV) ubiquitously expressed	NP_001988.1
dd_Smed_v6_1999_0	0.896513	2.76077	3.07945	9.63672	0.000783783
dd_Smed_v6_1331_0	1.98734	4.18982	2.10825	9.24186	0.0015031	LOC102642363	Mus musculus	high mobility group protein B1-like	XP_006544718.1
dd_Smed_v6_221_0	1.7726	3.6948	2.0844	9.22526	0.00154086	RPL28	Homo sapiens	ribosomal protein L28	NP_000982.2
dd_Smed_v6_52_0	3.51025	6.44294	1.83547	9.09807	0.00189453	YBX2	Homo sapiens	Y-box binding protein 2	NP_057066.2
dd_Smed_v6_2331_0	1.14847	2.74721	2.39206	9.08337	0.00194235	CHD4	Homo sapiens	chromodomain helicase DNA binding protein 4	XP_006719024.1
dd_Smed_v6_505_0	3.14723	6.37626	2.02599	9.07903	0.00195647	ND2	Schmidtea mediterranea	NADH dehydrogenase subunit 2	YP_008592436.1
dd_Smed_v6_4878_0	0.46343	1.76207	3.80223	9.01941	0.00215036
dd_Smed_v6_186_0	4.78768	7.91462	1.65312	8.80591	0.00303735	Eef2	Mus musculus	eukaryotic translation elongation factor 2	NP_031933.1
dd_Smed_v6_599_0	1.74078	3.60676	2.07192	8.79318	0.00309707	FABP3	Homo sapiens	fatty acid binding protein 3	NP_004093.1
dd_Smed_v6_289_0	3.81183	7.52656	1.97453	8.70616	0.0035252	nd3	Dugesia japonica	NADH dehydrogenase subunit 3	YP_004936157.1
dd_Smed_v6_1258_0	1.04591	2.55022	2.43828	8.63871	0.00398772	PIWIL1	Homo sapiens	piwi like RNA-mediated gene silencing 1	NP_004755.2
dd_Smed_v6_1608_0	1.09032	2.67879	2.45688	8.60138	0.00424368	CCAR1	Homo sapiens	cell division cycle and apoptosis regulator 1	NP_060707.2
dd_Smed_v6_294_0	1.68511	3.67264	2.17947	8.39316	0.00599399
dd_Smed_v6_1095_0	1.37177	2.96154	2.15892	8.32399	0.00669649	HMGB2	Homo sapiens	high mobility group box 2	NP_002120.1
dd_Smed_v6_556_0	1.49669	3.09279	2.06643	8.14986	0.00904093	AaeL	Aedes aegypti	AAEL014583-PA	XP_001649058.1
dd_Smed_v6_297_0	2.55915	4.82798	1.88656	8.08486	0.0100216	COX2	Cantherhines pardalis	cytochrome c oxidase subunit II	YP_002265552.1
dd_Smed_v6_629_0	1.73815	3.616	2.08037	8.06215	0.0103642
dd_Smed_v6_37_0	0.901114	2.89893	3.21705	8.02636	0.0110198	ACTB	Homo sapiens	actin, beta	NP_001092.1
dd_Smed_v6_149_0	2.43457	4.41642	1.81404	7.9901	0.0118291	RPL32	Homo sapiens	ribosomal protein L32	NP_000985.1
dd_Smed_v6_520_0	4.31039	7.99069	1.85382	7.93813	0.0129893
dd_Smed_v6_90_0	1.92284	6.0478	3.14525	7.91385	0.0135312	Dper	Drosophila persimilis	GL25421 gene product from transcript GL25421-RA	XP_002027228.1
dd_Smed_v6_228_0	1.79486	3.35493	1.86919	7.90563	0.0137147	RPL19	Homo sapiens	ribosomal protein L19	NP_000972.1
dd_Smed_v6_394_0	0.790113	1.85924	2.35314	7.77786	0.0169867	RPL39	Homo sapiens	ribosomal protein L39	NP_000991.1
dd_Smed_v6_269_0	2.40393	4.37076	1.81817	7.71368	0.019091	RPS3	Homo sapiens	ribosomal protein S3	NP_000996.2
dd_Smed_v6_168_0	2.71185	4.56504	1.68337	7.70513	0.0193711	LOC103375254	Stegastes partitus	TNF receptor-associated factor 2-like	XP_008303697.1
dd_Smed_v6_276_0	1.43143	2.86361	2.00052	7.68023	0.0201875	RPL7	Homo sapiens	ribosomal protein L7	NP_000962.2
dd_Smed_v6_151_0	2.24712	4.01889	1.78846	7.629	0.0218669	RPL5	Homo sapiens	ribosomal protein L5	NP_000960.2
dd_Smed_v6_99_0	1.28328	2.64307	2.05962	7.62041	0.0221488	Rps18	Mus musculus	ribosomal protein S18	NP_035426.1
dd_Smed_v6_95_0	2.29671	4.24595	1.84871	7.59277	0.0230684	RPL17	Homo sapiens	ribosomal protein L17	NP_000976.1
dd_Smed_v6_753_0	2.4076	4.54917	1.8895	7.54513	0.025338	COX1	Mus musculus	cytochrome c oxidase subunit I	NP_904330.1
dd_Smed_v6_287_0	1.43888	2.91445	2.0255	7.51281	0.0268778	RPL13A	Homo sapiens	ribosomal protein L13a	NP_036555.1
dd_Smed_v6_139_0	1.75598	3.23217	1.84067	7.43767	0.0304573	RPS14	Homo sapiens	ribosomal protein S14	NP_005608.1
dd_Smed_v6_130_0	1.57197	3.03558	1.93108	7.4219	0.0312086	Gm5621	Mus musculus	predicted gene 5621	XP_894815.1
dd_Smed_v6_62_0	6.03556	10.0524	1.66552	7.40414	0.0320542	HEXBP	Leishmania infantum JPCM5	putative universal minicircle sequence binding protein (UMSBP)	XP_001469754.1
dd_Smed_v6_112_0	1.61218	3.07891	1.90978	7.37653	0.0333696	CFL1	Homo sapiens	cofilin 1 (non-muscle)	NP_005498.1
dd_Smed_v6_226_0	2.00734	3.63342	1.81007	7.35482	0.0347043	RPS2	Homo sapiens	ribosomal protein S2	NP_002943.2
dd_Smed_v6_205_0	1.50416	2.97532	1.97806	7.35341	0.0348003	Rpl6	Mus musculus	ribosomal protein L6	NP_035420.2
dd_Smed_v6_156_0	2.80578	4.88723	1.74184	7.34044	0.0356854	RPS8	Homo sapiens	ribosomal protein S8	NP_001003.1
dd_Smed_v6_292_0	2.67752	4.80443	1.79436	7.29878	0.0385284	ND4	Aneides flavipunctatus	NADH dehydrogenase subunit 4	YP_097033.1
dd_Smed_v6_222_0	0.896313	2.01499	2.24809	7.25922	0.0412278	Cbr-rps-26	Caenorhabditis briggsae	C. briggsae CBR-RPS-26 protein	XP_002640699.1
dd_Smed_v6_121_0	1.3721	2.65579	1.93556	7.20911	0.0446478	LOC100641924	Amphimedon queenslandica	ubiquitin-40S ribosomal protein S27a-like	XP_003385055.1
dd_Smed_v6_164_0	0.792078	1.81756	2.29468	7.19905	0.0453339	LOC655928	Tribolium castaneum	40S ribosomal protein S24	XP_967577.1
dd_Smed_v6_170_0	1.38159	2.67178	1.93384	7.15241	0.0485165	RPS16	Homo sapiens	ribosomal protein S16	NP_001011.1
dd_Smed_v6_469_0	1.37587	2.65947	1.93294	7.12737	0.050717	LOC100904174	Metaseiulus occidentalis	histone H2A type 1-like	XP_003742041.1
dd_Smed_v6_8104_0	1.4631	2.63898	1.8037	7.05453	0.0577096	SOX2	Homo sapiens	SRY-box 2	NP_003097.1
dd_Smed_v6_123_0	1.12856	2.41719	2.14184	6.9302	0.0696461	RPS20	Homo sapiens	ribosomal protein S20	NP_001014.1
dd_Smed_v6_128_0	1.83507	3.40076	1.8532	6.91581	0.0712071	RPL18	Homo sapiens	ribosomal protein L18	NP_000970.1
dd_Smed_v6_1194_0	2.20531	4.2564	1.93007	6.85207	0.0796272	AGO3	Homo sapiens	argonaute 3, RISC catalytic component	XP_005270633.1
dd_Smed_v6_70_0	2.20166	3.74773	1.70223	6.7629	0.091406
dd_Smed_v6_921_0	0.527818	1.37583	2.60663	6.71342	0.0979425	XIRP2	Homo sapiens	xin actin-binding repeat containing 2	NP_001186074.1
dd_Smed_v6_839_0	0.764255	1.77929	2.32814	6.67527	0.103932	RPL6	Homo sapiens	ribosomal protein L6	XP_005253977.1
dd_Smed_v6_4172_0	0.440673	1.57391	3.57162	6.66036	0.106573	CDK18	Sarcophilus harrisii	cyclin-dependent kinase 18	XP_003767665.1
dd_Smed_v6_195_0	1.29182	2.37197	1.83615	6.64298	0.109647	RPS17	Homo sapiens	ribosomal protein S17	NP_001012.1
dd_Smed_v6_158_0	0.189577	0.987558	5.20927	6.64209	0.109806
dd_Smed_v6_110_0	0.912526	1.81779	1.99204	6.6157	0.114475	LOC101458595	Ceratitis capitata	60S ribosomal protein L34-like	XP_004536191.1
dd_Smed_v6_596_0	1.44594	2.78721	1.92761	6.55368	0.125452	Ddx43	Mus musculus	DEAD (Asp-Glu-Ala-Asp) box polypeptide 43	XP_006510795.1
dd_Smed_v6_290_0	2.23013	3.98837	1.7884	6.49397	0.136019	RPS23	Homo sapiens	ribosomal protein S23	NP_001016.1
dd_Smed_v6_189_0	1.08206	2.11742	1.95685	6.48554	0.137512	RPL21	Homo sapiens	ribosomal protein L21	NP_000973.2
dd_Smed_v6_113_0	1.10577	2.13056	1.92676	6.45253	0.144388	RPL31	Homo sapiens	ribosomal protein L31	NP_000984.1
dd_Smed_v6_1368_0	0.825324	1.69724	2.05645	6.37297	0.162662	PFDN2	Homo sapiens	prefoldin subunit 2	NP_036526.2
dd_Smed_v6_82_0	1.05476	2.02783	1.92254	6.34346	0.169441	RPS4Y1	Homo sapiens	ribosomal protein S4, Y-linked 1	NP_000999.1
dd_Smed_v6_565_0	0.981955	1.92529	1.96067	6.34288	0.169575
dd_Smed_v6_163_0	1.07433	2.02864	1.88828	6.30165	0.179047	RPS3A	Homo sapiens	ribosomal protein S3A	NP_000997.1
dd_Smed_v6_111_0	0.783834	1.62835	2.07741	6.28666	0.182488	RPL30	Homo sapiens	ribosomal protein L30	NP_000980.1
dd_Smed_v6_172_0	1.11089	2.1016	1.89181	6.28154	0.183665	RPL24	Homo sapiens	ribosomal protein L24	NP_000977.1
dd_Smed_v6_178_0	1.24416	2.32071	1.86528	6.27686	0.18474	Rps6	Mus musculus	ribosomal protein S6	NP_033122.1
dd_Smed_v6_1139_0	2.99653	5.73132	1.91265	6.26898	0.186551	TRAF5	Felis catus	TNF receptor-associated factor 5	XP_003999373.1
dd_Smed_v6_145_0	1.12093	2.11979	1.89109	6.26339	0.187835	RPL13	Homo sapiens	ribosomal protein L13	NP_150254.1
dd_Smed_v6_661_0	2.05656	3.96239	1.9267	6.25798	0.189077	SRSF10	Homo sapiens	serine/arginine-rich splicing factor 10	NP_006616.1
dd_Smed_v6_167_0	1.32522	2.31268	1.74513	6.22124	0.199046	Rpl14	Mus musculus	ribosomal protein L14	NP_080250.1
dd_Smed_v6_155_1	1.0831	2.04843	1.89126	6.21089	0.202017	RPL27A	Homo sapiens	ribosomal protein L27a	NP_000981.1
dd_Smed_v6_1181_0	3.94863	6.12454	1.55106	6.21027	0.202196	CCAR1	Homo sapiens	cell division cycle and apoptosis regulator 1	NP_060707.2
dd_Smed_v6_2421_0	1.44404	2.77051	1.91858	6.19887	0.205468	TOP1	Homo sapiens	topoisomerase (DNA) I	NP_003277.1
dd_Smed_v6_202_0	1.34778	2.41468	1.7916	6.19623	0.206228	RPS19	Homo sapiens	ribosomal protein S19	NP_001013.1
dd_Smed_v6_437_0	1.21304	2.2985	1.89483	6.18838	0.20848	RPL18A	Homo sapiens	ribosomal protein L18a	NP_000971.1
dd_Smed_v6_601_0	8.81478	13.6151	1.54457	6.14325	0.221441	AaeL	Aedes aegypti	AAEL014560-PA	XP_001649023.1
dd_Smed_v6_506_0	0.440537	1.10558	2.50961	6.12136	0.227726	HIST1H4A	Homo sapiens	histone cluster 1, H4a	NP_003529.1
dd_Smed_v6_295_0	1.00783	1.90343	1.88864	5.95835	0.278204	RPS5	Homo sapiens	ribosomal protein S5	NP_001000.2
dd_Smed_v6_7664_0	0.466006	1.23618	2.65272	5.94212	0.283776	LOC100064925	Equus caballus	zinc finger protein 850-like	XP_005611920.1
dd_Smed_v6_236_0	0.531395	1.22906	2.31289	5.93503	0.286211	RPL38	Homo sapiens	ribosomal protein L38	NP_000990.1
dd_Smed_v6_105_0	1.06397	1.9787	1.85974	5.91658	0.292547	RPL36	Homo sapiens	ribosomal protein L36	NP_056229.2
dd_Smed_v6_117_0	0.833471	1.60335	1.9237	5.91265	0.293898	RPS10	Homo sapiens	ribosomal protein S10	NP_001005.1
dd_Smed_v6_393_0	0.850987	1.65459	1.94431	5.86858	0.309033	SET	Homo sapiens	SET nuclear proto-oncogene	NP_003002.2
dd_Smed_v6_150_0	1.05485	1.97724	1.87443	5.8514	0.314931	RPL9	Homo sapiens	ribosomal protein L9	NP_000652.2
dd_Smed_v6_161_0	1.52634	2.56029	1.6774	5.81376	0.327859	RPLP0	Homo sapiens	ribosomal protein lateral stalk subunit P0	NP_000993.1
dd_Smed_v6_1007_0	0.704037	1.44608	2.05399	5.78748	0.337423
dd_Smed_v6_235_0	0.959976	1.79371	1.8685	5.72232	0.362795	RPL26	Homo sapiens	ribosomal protein L26	NP_000978.1
dd_Smed_v6_174_0	0.888783	1.67112	1.88023	5.68507	0.377301	GNB2L1	Homo sapiens	guanine nucleotide binding protein (G protein), beta polypeptide 2-like 1	NP_006089.1
dd_Smed_v6_724_0	1.41776	2.32587	1.64053	5.67598	0.380841	DDX39B	Homo sapiens	DEAD-box helicase 39B	NP_004631.1
dd_Smed_v6_227_0	0.71604	1.41963	1.98261	5.67075	0.382877	RPS11	Homo sapiens	ribosomal protein S11	NP_001006.1
dd_Smed_v6_5107_0	3.00831	4.65182	1.54632	5.63959	0.395009
dd_Smed_v6_214_0	0.766814	1.56555	2.04162	5.63185	0.398024	cgd8	Cryptosporidium parvum Iowa II	ribosomal protein S29	XP_627296.1
dd_Smed_v6_4141_0	0.788138	1.66747	2.11571	5.62727	0.399808	SMARCA4	Homo sapiens	SWI/SNF related, matrix associated, actin dependent regulator of chromatin, subfamily a, member 4	NP_001122317.1
dd_Smed_v6_344_0	1.39227	2.41996	1.73814	5.6049	0.408519	cytb	Callitettix versicolor	cytochrome b	YP_007317465.1
dd_Smed_v6_1169_0	0.638572	1.33801	2.09531	5.57078	0.421909	RBM8A	Homo sapiens	RNA binding motif protein 8A	NP_005096.1
dd_Smed_v6_1935_0	1.75076	2.86939	1.63894	5.54425	0.4329
dd_Smed_v6_12001_0	3.8142	5.86274	1.53708	5.53997	0.434674
dd_Smed_v6_2522_0	0.725772	1.55129	2.13743	5.52613	0.440406	QPRT	Homo sapiens	quinolinate phosphoribosyltransferase	NP_055113.2
dd_Smed_v6_65_0	0.956603	1.80918	1.89125	5.51434	0.445293	RPS28	Homo sapiens	ribosomal protein S28	NP_001022.1
dd_Smed_v6_2520_0	0.463496	1.08639	2.3439	5.51315	0.445786	AaeL	Aedes aegypti	AAEL015682-PA	XP_001657158.1
dd_Smed_v6_802_0	1.24627	2.16368	1.73612	5.50604	0.448731	AaeL	Aedes aegypti	high mobility group B1, putative	XP_001655323.1
dd_Smed_v6_1327_0	0.581095	1.21132	2.08455	5.44856	0.472545	HNRNPL	Homo sapiens	heterogeneous nuclear ribonucleoprotein L	NP_001524.2
dd_Smed_v6_1859_0	0.781902	1.49126	1.90722	5.38362	0.499452	Zfp346	Mus musculus	zinc finger protein 346	NP_036147.1
dd_Smed_v6_857_0	1.23749	2.22017	1.79409	5.37594	0.502634
dd_Smed_v6_2124_0	0.730478	1.42745	1.95414	5.36747	0.506143
dd_Smed_v6_144_0	1.28624	2.21708	1.72369	5.36219	0.50833	RPL11	Homo sapiens	ribosomal protein L11	NP_001186731.1
dd_Smed_v6_512_0	1.66658	2.96292	1.77784	5.36025	0.509131
dd_Smed_v6_350_0	0.775038	1.42465	1.83817	5.32789	0.522579	LOC100633539	Amphimedon queenslandica	60S ribosomal protein L10a-like	XP_003383401.1
dd_Smed_v6_633_0	1.39936	2.37315	1.69588	5.28863	0.53891	SNRNP70	Homo sapiens	small nuclear ribonucleoprotein U1 subunit 70	NP_003080.2
dd_Smed_v6_1328_0	0.256143	0.758526	2.96133	5.2807	0.542209
dd_Smed_v6_7227_0	0.1387	0.842239	6.0724	5.24532	0.556928
dd_Smed_v6_193_0	1.15501	1.98714	1.72046	5.24306	0.557867	Rpl15	Mus musculus	ribosomal protein L15	NP_079862.1
dd_Smed_v6_134_0	0.769117	1.44984	1.88507	5.23109	0.562847	RPS25	Homo sapiens	ribosomal protein S25	NP_001019.1
dd_Smed_v6_84_0	0.759163	1.44576	1.90441	5.20869	0.572165	RPS21	Homo sapiens	ribosomal protein S21	NP_001015.1
dd_Smed_v6_1206_0	0.281706	0.818175	2.90435	5.19736	0.576876	Hpgds	Mus musculus	hematopoietic prostaglandin D synthase	NP_062328.3
dd_Smed_v6_371_0	0.630912	1.20111	1.90376	5.18735	0.581041	NACA	Homo sapiens	nascent polypeptide-associated complex alpha subunit	NP_001106673.1
dd_Smed_v6_281_0	1.04832	1.80398	1.72083	5.17696	0.585361	RPL23A	Homo sapiens	ribosomal protein L23a	NP_000975.2
dd_Smed_v6_483_0	0.613628	1.2266	1.99893	5.16684	0.589571	LOC101860768	Aplysia californica	DNA-binding protein HEXBP-like	XP_005107661.1
dd_Smed_v6_242_0	1.15478	1.98053	1.71507	5.0997	0.617005	RPL23	Homo sapiens	ribosomal protein L23	NP_000969.1
dd_Smed_v6_358_0	0.914109	1.65442	1.80987	5.09376	0.619364	BTF3	Homo sapiens	basic transcription factor 3	NP_001198.2
dd_Smed_v6_618_0	0.631715	1.2724	2.01419	5.08861	0.621413	SET	Homo sapiens	SET nuclear proto-oncogene	NP_003002.2
dd_Smed_v6_471_0	0.21359	0.597208	2.79605	5.06474	0.630896	TUBB4B	Homo sapiens	tubulin beta 4B class IVb	NP_006079.1
dd_Smed_v6_259_0	0.876223	1.54919	1.76804	5.03848	0.641325	RPL12	Homo sapiens	ribosomal protein L12	NP_000967.1
dd_Smed_v6_3431_0	0.462689	0.96262	2.08049	4.99686	0.657862	SRSF4	Homo sapiens	serine/arginine-rich splicing factor 4	NP_005617.2
dd_Smed_v6_2810_0	0.149382	0.439869	2.94458	4.99619	0.658127	Cre-inx-1	Caenorhabditis remanei	CRE-INX-1 protein	XP_003117636.1
dd_Smed_v6_92_0	0.91164	1.64067	1.79969	4.99012	0.660537	RPS9	Homo sapiens	ribosomal protein S9	NP_001004.2
dd_Smed_v6_224_0	0.718732	1.32988	1.85032	4.98662	0.661929	RPLP1	Homo sapiens	ribosomal protein lateral stalk subunit P1	NP_000994.1
dd_Smed_v6_1683_0	1.08475	1.91672	1.76697	4.91006	0.692344
dd_Smed_v6_670_0	0.601859	1.18816	1.97415	4.88157	0.702912	TMEM14C	Homo sapiens	transmembrane protein 14C	NP_057546.1
dd_Smed_v6_1219_1	0.593245	1.3574	2.2881	4.88054	0.703282	PLAC8L1	Homo sapiens	PLAC8-like 1	NP_001025040.1
dd_Smed_v6_10914_0	0.0741605	0.455895	6.14741	4.87285	0.706051
dd_Smed_v6_2443_0	0.269304	0.70928	2.63375	4.86158	0.710113	TLN1	Homo sapiens	talin 1	NP_006280.3
dd_Smed_v6_2957_0	0.507901	1.05959	2.08622	4.85925	0.710952	MFAP1	Homo sapiens	microfibrillar associated protein 1	NP_005917.2
dd_Smed_v6_3879_0	0.163999	0.615476	3.75292	4.85194	0.713586	Cbr-inx-13	Caenorhabditis briggsae	C. briggsae CBR-INX-13 protein	XP_002646290.1
dd_Smed_v6_986_0	0.386993	0.831117	2.14763	4.8442	0.716374	HNRNPA2B1	Homo sapiens	heterogeneous nuclear ribonucleoprotein A2/B1	NP_002128.1
dd_Smed_v6_171_0	1.32383	2.14423	1.61971	4.83998	0.717897	RPSA	Homo sapiens	ribosomal protein SA	NP_002286.2
dd_Smed_v6_996_0	0.535276	1.04792	1.95771	4.80914	0.729008	FSCN1	Homo sapiens	fascin actin-bundling protein 1	NP_003079.1
dd_Smed_v6_1770_0	1.35366	2.39114	1.76642	4.80573	0.730235	Golph3	Mus musculus	golgi phosphoprotein 3	NP_079949.1
dd_Smed_v6_611_0	0.400579	0.847373	2.11537	4.80417	0.7308	MSN	Homo sapiens	moesin	NP_002435.1
dd_Smed_v6_64_0	0.580371	1.12225	1.93368	4.80319	0.73115	RPL36A	Homo sapiens	ribosomal protein L36a	NP_066357.2
dd_Smed_v6_737_0	0.760498	1.43784	1.89065	4.80068	0.732056	EIF4A3	Homo sapiens	eukaryotic translation initiation factor 4A3	NP_055555.1
dd_Smed_v6_3827_0	0.140948	0.441993	3.13585	4.80026	0.732208
dd_Smed_v6_268_0	0.823523	1.46543	1.77946	4.72568	0.759079	RPS12	Homo sapiens	ribosomal protein S12	NP_001007.2
dd_Smed_v6_995_0	0.544253	1.05265	1.93413	4.71489	0.762968	IWS1	Homo sapiens	IWS1 homolog (S. cerevisiae)	NP_060439.2
dd_Smed_v6_10356_0	0.437472	0.941684	2.15256	4.71143	0.764211
dd_Smed_v6_6243_0	2.06835	3.47751	1.6813	4.70803	0.76544
dd_Smed_v6_1631_0	0.605394	1.13893	1.88131	4.69979	0.768407
dd_Smed_v6_3849_0	0.81661	1.81075	2.2174	4.67946	0.775734	DTYMK	Homo sapiens	deoxythymidylate kinase	NP_036277.2
dd_Smed_v6_1804_0	0.518569	1.03568	1.9972	4.65102	0.784617	SMARCC2	Homo sapiens	SWI/SNF related, matrix associated, actin dependent regulator of chromatin subfamily c member 2	NP_003066.2
dd_Smed_v6_1909_1	0.508131	1.01193	1.99146	4.65098	0.78463	LOC100116863	Nasonia vitripennis	pre-mRNA-processing factor 40 homolog A	XP_008209232.1
dd_Smed_v6_9705_0	1.43093	2.28302	1.59548	4.64401	0.786782	Lars2	Mus musculus	leucyl-tRNA synthetase, mitochondrial	NP_694808.1
dd_Smed_v6_794_0	1.20986	1.96988	1.62819	4.63782	0.788697	DDX39B	Homo sapiens	DEAD-box helicase 39B	NP_004631.1
dd_Smed_v6_2297_0	0.704136	1.29612	1.84072	4.63222	0.790427	SARNP	Homo sapiens	SAP domain containing ribonucleoprotein	NP_149073.1
dd_Smed_v6_3984_0	0.368564	0.807486	2.1909	4.62611	0.792317
dd_Smed_v6_188_0	1.80013	2.70491	1.50262	4.62302	0.793273
dd_Smed_v6_308_0	1.31934	2.09281	1.58625	4.61492	0.795776	EEF1G	Homo sapiens	eukaryotic translation elongation factor 1 gamma	NP_001395.1
dd_Smed_v6_334_0	0.712723	1.2721	1.78484	4.57573	0.807891	EIF1AX	Homo sapiens	eukaryotic translation initiation factor 1A, X-linked	NP_001403.1
dd_Smed_v6_1001_0	0.301136	0.702689	2.33346	4.56947	0.809828	SF3A1	Homo sapiens	splicing factor 3a subunit 1	NP_005868.1
dd_Smed_v6_4685_0	0.254972	0.650641	2.55182	4.56414	0.811475
dd_Smed_v6_4279_0	0.213223	0.642228	3.012	4.55973	0.812838
dd_Smed_v6_230_0	0.674958	1.20405	1.78389	4.5475	0.816618	RPL22	Homo sapiens	ribosomal protein L22	NP_000974.1
dd_Smed_v6_5080_0	0.53657	1.0525	1.96153	4.53598	0.82018	DDX23	Homo sapiens	DEAD-box helicase 23	NP_004809.2
dd_Smed_v6_316_0	0.832458	1.40699	1.69017	4.51276	0.827356	LOC100211718	Hydra vulgaris	putative G3BP-like protein-like	XP_002154582.2
dd_Smed_v6_1228_0	0.338945	0.719992	2.12422	4.49013	0.834353	RPS6KB2	Homo sapiens	ribosomal protein S6 kinase B2	NP_003943.2
dd_Smed_v6_1431_0	0.827143	1.50705	1.82199	4.47029	0.840486
dd_Smed_v6_237_0	0.394557	0.816942	2.07053	4.45006	0.846543	RPS15A	Homo sapiens	ribosomal protein S15a	NP_001010.2
dd_Smed_v6_2143_0	0.0898334	0.354666	3.94804	4.42271	0.853356	TUBA1A	Homo sapiens	tubulin alpha 1a	NP_001257329.1
dd_Smed_v6_1192_0	0.437667	0.864673	1.97564	4.39105	0.86124	SRSF1	Homo sapiens	serine/arginine-rich splicing factor 1	NP_008855.1
dd_Smed_v6_549_0	0.599654	1.09779	1.83071	4.38802	0.861993	RPL27A	Homo sapiens	ribosomal protein L27a	NP_000981.1
dd_Smed_v6_204_0	0.673195	1.20625	1.79183	4.38209	0.863472	RPS7	Homo sapiens	ribosomal protein S7	NP_001002.1
dd_Smed_v6_96_0	0.58297	1.06687	1.83007	4.36377	0.868034	RPLP2	Homo sapiens	ribosomal protein lateral stalk subunit P2	NP_000995.1
dd_Smed_v6_5868_0	3.12785	4.47329	1.43015	4.34645	0.872348	LOC100651082	Bombus terrestris	probable sodium/potassium/calcium exchanger CG1090-like	XP_003397022.1
dd_Smed_v6_1476_0	0.999142	1.68416	1.68561	4.32901	0.87669	Tars	Mus musculus	threonyl-tRNA synthetase	NP_149065.2
dd_Smed_v6_1582_0	0.514969	0.981762	1.90645	4.32244	0.878327
dd_Smed_v6_738_0	1.1181	1.82062	1.62831	4.32234	0.878353	LOC101173732	Oryzias latipes	voltage-dependent anion-selective channel protein 2	XP_004077149.1
dd_Smed_v6_93_0	3.41426	4.61957	1.35302	4.32023	0.878877	PABPC4	Homo sapiens	poly(A) binding protein cytoplasmic 4	NP_001129126.1
dd_Smed_v6_200_0	0.565587	1.03488	1.82975	4.298	0.884414	RPL27	Homo sapiens	ribosomal protein L27	NP_000979.1
dd_Smed_v6_1536_0	0.314249	0.720399	2.29245	4.28792	0.886925	FKBP2	Homo sapiens	FK506 binding protein 2	NP_004461.2
dd_Smed_v6_4340_0	0.570062	1.05419	1.84925	4.27406	0.890376
dd_Smed_v6_140_0	0.823888	1.40289	1.70276	4.27251	0.890763	RPL37A	Homo sapiens	ribosomal protein L37a	NP_000989.1
dd_Smed_v6_6866_0	0.152541	0.414689	2.71854	4.26677	0.892191	CCNG2	Homo sapiens	cyclin G2	NP_004345.1
dd_Smed_v6_325_0	0.303264	0.693362	2.28633	4.26649	0.892263	UBA52	Homo sapiens	ubiquitin A-52 residue ribosomal protein fusion product 1	NP_003324.1
dd_Smed_v6_15473_0	0.224764	0.58456	2.60077	4.26364	0.892971	LOC101851829	Aplysia californica	zinc finger protein 384-like	XP_005107798.1
dd_Smed_v6_376_0	0.711324	1.22648	1.72423	4.26128	0.893558
dd_Smed_v6_11034_0	1.2301	1.90906	1.55195	4.21745	0.903743	HCN1	Homo sapiens	hyperpolarization activated cyclic nucleotide-gated potassium channel 1	NP_066550.2
dd_Smed_v6_3654_0	2.37341	3.43371	1.44674	4.204	0.906242	LOC101851171	Aplysia californica	microtubule-associated protein futsch-like	XP_005091094.1
dd_Smed_v6_957_0	0.589255	1.02245	1.73516	4.18844	0.909132	ND5	Bhagadatta austenia	NADH dehydrogenase subunit 5	YP_009045449.1
dd_Smed_v6_2111_0	0.21569	0.525178	2.43487	4.17947	0.910799	LOC101861245	Aplysia californica	heterogeneous nuclear ribonucleoprotein K-like	XP_005089076.1
dd_Smed_v6_672_0	0.699033	1.1864	1.69721	4.13564	0.918942	FKBP1B	Homo sapiens	FK506 binding protein 1B	NP_004107.1
dd_Smed_v6_7195_0	0.760211	1.45302	1.91134	4.10554	0.924533	DCC	Homo sapiens	DCC netrin 1 receptor	NP_005206.2
dd_Smed_v6_1397_0	2.46001	3.86911	1.5728	4.09925	0.9257	ZRANB2	Homo sapiens	zinc finger RANBP2-type containing 2	NP_005446.2
dd_Smed_v6_4012_0	0.385113	0.775545	2.01381	4.08805	0.927782	PIM1	Homo sapiens	Pim-1 proto-oncogene, serine/threonine kinase	NP_002639.1
dd_Smed_v6_5740_0	0.435452	0.985748	2.26374	4.07781	0.929684	LOC102912912	Peromyscus maniculatus bairdii	TNF receptor-associated factor 5-like	XP_006988211.1
dd_Smed_v6_2064_0	2.61898	4.16785	1.5914	4.07111	0.930929	PPIG	Homo sapiens	peptidylprolyl isomerase G	NP_004783.2
dd_Smed_v6_1578_0	0.3075	0.683307	2.22214	4.06948	0.931231	KHDRBS2	Homo sapiens	KH domain containing, RNA binding, signal transduction associated 2	XP_006715418.1
dd_Smed_v6_532_0	0.790045	1.34135	1.69781	4.04876	0.93508	H3F3A	Homo sapiens	H3 histone, family 3A	NP_002098.1
dd_Smed_v6_46148_0	0.681939	1.15652	1.69592	4.03343	0.937929
dd_Smed_v6_4675_0	0.523929	1.09529	2.09054	4.0052	0.943172
dd_Smed_v6_963_0	0.461029	0.903136	1.95896	3.98198	0.946095	CoVIb	Drosophila melanogaster	Cytochrome c oxidase subunit VIb	NP_728295.1
dd_Smed_v6_3886_0	1.22229	1.96275	1.60579	3.97126	0.947431	Srrm1	Mus musculus	serine/arginine repetitive matrix 1	XP_006539090.1
dd_Smed_v6_1957_0	0.355473	0.73224	2.0599	3.9617	0.948622	HNRNPF	Homo sapiens	heterogeneous nuclear ribonucleoprotein F	NP_004957.1
dd_Smed_v6_49258_0	0.589069	1.03582	1.7584	3.94722	0.950426
dd_Smed_v6_936_0	0.869586	1.34084	1.54193	3.93762	0.951622	CAPRIN1	Homo sapiens	cell cycle associated protein 1	NP_976240.1
dd_Smed_v6_5765_0	0.282987	0.687516	2.4295	3.93644	0.951769	COA6	Homo sapiens	cytochrome c oxidase assembly factor 6 homolog (S. cerevisiae)	NP_001013003.1
dd_Smed_v6_695_0	0.665493	1.12845	1.69566	3.93528	0.951913	HDAC2	Homo sapiens	histone deacetylase 2	NP_001518.3
dd_Smed_v6_4095_0	0.211781	0.522831	2.46873	3.93112	0.952431	SMEK1	Homo sapiens	SMEK homolog 1, suppressor of mek1 (Dictyostelium)	XP_005267899.1
dd_Smed_v6_97_0	1.02551	1.56015	1.52135	3.92268	0.953483	AFLA	Aspergillus flavus NRRL3357	60S ribosomal protein L37	XP_002383966.1
dd_Smed_v6_1629_0	1.49439	2.16879	1.45128	3.91201	0.954812
dd_Smed_v6_5519_0	0.27029	0.608726	2.25212	3.90597	0.955564
dd_Smed_v6_659_0	1.228	2.21574	1.80435	3.89859	0.956484	Piwil4	Mus musculus	piwi-like RNA-mediated gene silencing 4	XP_006510493.1
dd_Smed_v6_19560_0	0.283995	0.594132	2.09205	3.88756	0.957859
dd_Smed_v6_2179_0	0.176901	0.437879	2.47528	3.87814	0.959032	AaeL	Aedes aegypti	AAEL002557-PA	XP_001655584.1
dd_Smed_v6_5890_0	0.590802	1.26788	2.14602	3.86874	0.960203	MORF4L1	Homo sapiens	mortality factor 4 like 1	NP_001252532.1
dd_Smed_v6_3809_0	0.316849	0.645545	2.03739	3.8601	0.961279	SMC3	Homo sapiens	structural maintenance of chromosomes 3	NP_005436.1
dd_Smed_v6_100_0	8.91992	13.8474	1.55241	3.85299	0.962165
dd_Smed_v6_868_0	0.647315	1.11146	1.71703	3.83996	0.963789
dd_Smed_v6_2470_0	0.451891	0.852077	1.88558	3.83801	0.964031	CACNA2D2	Homo sapiens	calcium voltage-gated channel auxiliary subunit alpha2delta 2	NP_001278030.1
dd_Smed_v6_1478_0	0.332146	0.650577	1.95871	3.83333	0.964615	DPYSL2	Homo sapiens	dihydropyrimidinase like 2	NP_001377.1
dd_Smed_v6_5856_0	0.552432	1.06694	1.93135	3.83119	0.964881	DSCAM	Eptesicus fuscus	Down syndrome cell adhesion molecule	XP_008144005.1
dd_Smed_v6_2216_0	0.224875	0.489665	2.1775	3.8243	0.96574	SF3B6	Homo sapiens	splicing factor 3b, subunit 6, 14kDa	NP_057131.1
dd_Smed_v6_481_0	0.277986	0.589925	2.12214	3.81147	0.967338	RPL29	Homo sapiens	ribosomal protein L29	NP_000983.1
dd_Smed_v6_758_1	2.14831	3.11295	1.44902	3.80594	0.968026	HSP90B1	Homo sapiens	heat shock protein 90kDa beta family member 1	NP_003290.1
dd_Smed_v6_1177_0	0.724936	1.30861	1.80514	3.78822	0.970235
dd_Smed_v6_318_0	0.438842	0.808453	1.84224	3.77997	0.971238	RPL35A	Homo sapiens	ribosomal protein L35a	NP_000987.2
dd_Smed_v6_6641_0	0.235309	0.536293	2.27909	3.76498	0.972286	METTL14	Homo sapiens	methyltransferase like 14	NP_066012.1
dd_Smed_v6_3724_0	0.219665	0.494337	2.25041	3.74646	0.973579	LUC7L3	Homo sapiens	LUC7 like 3 pre-mRNA splicing factor	NP_057508.2
dd_Smed_v6_360_0	0.771532	1.22731	1.59074	3.74321	0.973807	RPS13	Homo sapiens	ribosomal protein S13	NP_001008.1
dd_Smed_v6_3023_0	0.195144	0.453896	2.32595	3.73544	0.97435	Fkbp6	Mus musculus	FK506 binding protein 6	NP_291049.1
dd_Smed_v6_1997_0	0.836244	1.30043	1.55508	3.73396	0.974453	Hdac6	Mus musculus	histone deacetylase 6	NP_034543.3
dd_Smed_v6_4112_0	0.206317	0.482154	2.33695	3.73302	0.974518	TLE3	Homo sapiens	transducin like enhancer of split 3	NP_001269911.1
dd_Smed_v6_4989_0	0.172279	0.437803	2.54124	3.73183	0.974602	COPS2	Homo sapiens	COP9 signalosome subunit 2	NP_004227.1
dd_Smed_v6_7394_0	0.42965	0.779927	1.81526	3.71764	0.975593	Baz2b	Mus musculus	bromodomain adjacent to zinc finger domain, 2B	XP_006499924.1
dd_Smed_v6_2881_0	0.916382	1.43111	1.56169	3.71695	0.975641	CWC15	Homo sapiens	CWC15 spliceosome-associated protein	NP_057487.2
dd_Smed_v6_2113_0	0.705895	1.16996	1.65742	3.71241	0.975959	Slc3a2	Mus musculus	solute carrier family 3 (activators of dibasic and neutral amino acid transport), member 2	NP_001154885.1
dd_Smed_v6_922_0	0.603685	1.024	1.69625	3.71152	0.97602
dd_Smed_v6_2250_0	2.26353	3.30259	1.45904	3.70617	0.976394
dd_Smed_v6_106_0	0.712007	1.13237	1.5904	3.68505	0.97787	LOC101858526	Aplysia californica	40S ribosomal protein S27-like	XP_005110289.1
dd_Smed_v6_1788_0	0.153015	0.379265	2.47862	3.67966	0.978246	SF3A2	Homo sapiens	splicing factor 3a subunit 2	NP_009096.2
dd_Smed_v6_14151_0	0.620419	1.0185	1.64163	3.67173	0.978801
dd_Smed_v6_2428_0	0.138555	0.392424	2.83226	3.66692	0.979136
dd_Smed_v6_1000_0	0.756803	1.26702	1.67418	3.6574	0.979802	CSNK2A1	Homo sapiens	casein kinase 2 alpha 1	NP_001886.1
dd_Smed_v6_1719_0	0.159611	0.439711	2.75489	3.64892	0.980394	TSPAN9	Homo sapiens	tetraspanin 9	NP_006666.1
dd_Smed_v6_2139_0	0.200708	0.457896	2.2814	3.64062	0.980974	TIA1	Homo sapiens	TIA1 cytotoxic granule-associated RNA binding protein	XP_005264581.1
dd_Smed_v6_14213_0	0.151472	0.570446	3.76602	3.63881	0.9811	CBG01382	Caenorhabditis briggsae	Hypothetical protein CBG01382	XP_002636131.1
dd_Smed_v6_1998_0	0.451877	0.815084	1.80377	3.61547	0.98273	Hnrnpk	Mus musculus	heterogeneous nuclear ribonucleoprotein K	NP_079555.1
dd_Smed_v6_1012_0	0.540852	0.928645	1.717	3.60143	0.983712	NSA2	Homo sapiens	NSA2 ribosome biogenesis homolog (S. cerevisiae)	NP_055701.1
dd_Smed_v6_1566_1	0.311503	0.585388	1.87924	3.59932	0.983859	RBM4	Homo sapiens	RNA binding motif protein 4	NP_001185772.1
dd_Smed_v6_1396_0	0.725751	1.16891	1.61062	3.57213	0.985758	Dvir	Drosophila virilis	GJ22166 gene product from transcript GJ22166-RA	XP_002050458.1
dd_Smed_v6_5304_0	0.599532	0.96932	1.61679	3.54044	0.987267	SLC35E1	Homo sapiens	solute carrier family 35 member E1	NP_079157.3
dd_Smed_v6_1285_0	0.231393	0.481746	2.08194	3.52935	0.987541	LOC100694519	Oreochromis niloticus	RNA-binding protein 4B-like	XP_003450397.2
dd_Smed_v6_1153_0	0.287343	0.565242	1.96713	3.52804	0.987574	PRPF6	Homo sapiens	pre-mRNA processing factor 6	NP_036601.2
dd_Smed_v6_326_0	1.10439	1.60642	1.45457	3.50161	0.988228	SET	Homo sapiens	SET nuclear proto-oncogene	NP_003002.2
dd_Smed_v6_4360_0	0.473274	0.856912	1.81061	3.49682	0.988347	RTF1	Homo sapiens	RTF1 homolog, Paf1/RNA polymerase II complex component	NP_055953.3
dd_Smed_v6_673_0	0.329064	0.641268	1.94876	3.46859	0.989046				WP_012790263.1
dd_Smed_v6_812_0	0.576254	0.946608	1.64269	3.46789	0.989064	KHSRP	Homo sapiens	KH-type splicing regulatory protein	NP_003676.2
dd_Smed_v6_7847_0	0.680807	1.07233	1.57509	3.43994	0.989756	SLC46A3	Anas platyrhynchos	solute carrier family 46, member 3	XP_005017509.1
dd_Smed_v6_13149_0	0.240263	0.525059	2.18535	3.43979	0.98976
dd_Smed_v6_2799_0	0.71041	1.25167	1.76189	3.43825	0.989798	LOC100650792	Bombus terrestris	polypyrimidine tract-binding protein 2	XP_003401618.1
dd_Smed_v6_1892_0	0.37002	0.716447	1.93624	3.43764	0.989813	Cir1	Mus musculus	corepressor interacting with RBPJ, 1	XP_006543719.1
dd_Smed_v6_2756_0	0.696083	1.07793	1.54857	3.40631	0.990589
dd_Smed_v6_1276_0	0.290804	0.552215	1.89893	3.40322	0.990666	PRPF19	Homo sapiens	pre-mRNA processing factor 19	NP_055317.1
dd_Smed_v6_1921_0	0.526444	0.86928	1.65123	3.39955	0.990756	FKBP4	Homo sapiens	FK506 binding protein 4	NP_002005.1
dd_Smed_v6_2274_0	0.963401	1.54926	1.60812	3.39934	0.990762	Gm5161	Mus musculus	predicted pseudogene 5161	XP_006544489.1
dd_Smed_v6_4218_0	0.70116	1.14134	1.62778	3.39207	0.990942	PBRM1	Homo sapiens	polybromo 1	XP_005265332.1
dd_Smed_v6_5865_0	0.707004	1.34409	1.90111	3.38359	0.991152	SMC4	Homo sapiens	structural maintenance of chromosomes 4	NP_001002800.1
dd_Smed_v6_2395_0	1.05599	1.82201	1.72541	3.37957	0.991251	NCOA5	Homo sapiens	nuclear receptor coactivator 5	NP_066018.1
dd_Smed_v6_3927_0	1.05137	1.66668	1.58526	3.37221	0.991434	NIPBL	Homo sapiens	NIPBL, cohesin loading factor	NP_597677.2
dd_Smed_v6_4601_0	0.192951	0.419072	2.17191	3.34654	0.992069
dd_Smed_v6_3772_0	0.29819	0.625142	2.09646	3.34444	0.992121	SNRPC	Homo sapiens	small nuclear ribonucleoprotein polypeptide C	NP_003084.1
dd_Smed_v6_1991_0	0.464685	0.808109	1.73905	3.34223	0.992176	TRAF3	Homo sapiens	TNF receptor associated factor 3	NP_663778.1
dd_Smed_v6_3022_0	0.393388	0.681779	1.7331	3.33237	0.99242	SNRNP200	Homo sapiens	small nuclear ribonucleoprotein U5 subunit 200	NP_054733.2
dd_Smed_v6_15494_0	0.643113	0.996146	1.54894	3.32355	0.992363	Taf2	Mus musculus	TAF2 RNA polymerase II, TATA box binding protein (TBP)-associated factor	XP_006521139.1
dd_Smed_v6_757_0	1.34402	1.97089	1.46641	3.30771	0.992224	HNRNPD	Homo sapiens	heterogeneous nuclear ribonucleoprotein D	NP_001003810.1
dd_Smed_v6_14413_0	0.163861	0.429676	2.62219	3.3073	0.992221
dd_Smed_v6_9416_0	1.40297	1.98268	1.41321	3.29275	0.992093	FYN	Homo sapiens	FYN proto-oncogene, Src family tyrosine kinase	NP_002028.1
dd_Smed_v6_1707_0	0.616499	0.993305	1.6112	3.28782	0.99205	GANAB	Homo sapiens	glucosidase, alpha. neutral AB	NP_938148.1
dd_Smed_v6_2016_0	0.13325	0.314904	2.36325	3.28659	0.992039	LBR	Homo sapiens	lamin B receptor	NP_002287.2
dd_Smed_v6_160_0	0.327123	0.604781	1.84879	3.26242	0.991828	DBI	Homo sapiens	diazepam binding inhibitor (GABA receptor modulator, acyl-CoA binding protein)	NP_001073331.1
dd_Smed_v6_849_0	0.755044	1.1833	1.5672	3.25501	0.991763	Ndufs8	Mus musculus	NADH dehydrogenase (ubiquinone) Fe-S protein 8	NP_659119.2
dd_Smed_v6_7985_0	0.496502	0.855228	1.72251	3.25303	0.991746	CHD9	Homo sapiens	chromodomain helicase DNA binding protein 9	XP_005256232.1
dd_Smed_v6_6296_0	0.12409	0.294437	2.37278	3.25171	0.991734	AgaP	Anopheles gambiae str. PEST	AGAP007922-PA	XP_001689044.1
dd_Smed_v6_11113_0	0.152592	0.414235	2.71467	3.25168	0.991734	FLI1	Homo sapiens	Fli-1 proto-oncogene, ETS transcription factor	NP_001257941.1
dd_Smed_v6_686_0	0.425685	0.695585	1.63404	3.24485	0.991674	PPIB	Homo sapiens	peptidylprolyl isomerase B	NP_000933.1
dd_Smed_v6_544_0	0.434407	0.73091	1.68255	3.24315	0.991659	CCT5	Homo sapiens	chaperonin containing TCP1, subunit 5 (epsilon)	NP_036205.1
dd_Smed_v6_6381_0	0.179249	0.416289	2.32241	3.24229	0.991652
dd_Smed_v6_9735_1	3.92545	6.09547	1.55281	3.24073	0.991638
dd_Smed_v6_426_0	0.482988	0.804911	1.66652	3.23734	0.991608	PDIA3	Homo sapiens	protein disulfide isomerase family A member 3	NP_005304.3
dd_Smed_v6_2860_0	0.365144	0.65502	1.79387	3.23312	0.991571	CG4278	Drosophila melanogaster	CG4278 gene product from transcript CG4278-RA	NP_609790.1
dd_Smed_v6_2769_0	0.319111	0.608669	1.90739	3.22828	0.991529	IGFALS	Ornithorhynchus anatinus	insulin-like growth factor binding protein, acid labile subunit	XP_001520129.3
dd_Smed_v6_3098_0	0.287326	0.540781	1.88212	3.22483	0.991499	PBX3	Homo sapiens	PBX homeobox 3	NP_006186.1
dd_Smed_v6_725_0	0.694233	1.11111	1.60048	3.21712	0.991431	Hadh	Mus musculus	hydroxyacyl-Coenzyme A dehydrogenase	NP_032238.2
dd_Smed_v6_894_0	0.512965	0.843888	1.64512	3.21578	0.99142	FKBP1B	Homo sapiens	FK506 binding protein 1B	NP_004107.1
dd_Smed_v6_9360_0	0.768472	1.33318	1.73484	3.21427	0.991406	SMC1A	Homo sapiens	structural maintenance of chromosomes 1A	NP_006297.2
dd_Smed_v6_482_0	0.495222	0.803368	1.62224	3.21282	0.991394	VCP	Homo sapiens	valosin containing protein	NP_009057.1
dd_Smed_v6_625_0	0.334859	0.595358	1.77794	3.20899	0.99136	LOC100367353	Saccoglossus kowalevskii	inorganic pyrophosphatase-like	XP_002733172.1
dd_Smed_v6_220_0	14.0908	16.8459	1.19553	3.19548	0.991242	CALR	Homo sapiens	calreticulin	NP_004334.1
dd_Smed_v6_2283_0	0.216694	0.443059	2.04463	3.18655	0.991164
dd_Smed_v6_5058_0	0.285489	0.538958	1.88784	3.16632	0.990986	ZNF226	Homo sapiens	zinc finger protein 226	NP_001027544.1
dd_Smed_v6_3762_0	0.45119	0.743671	1.64824	3.15885	0.990921	ZFR	Homo sapiens	zinc finger RNA binding protein	XP_006714540.1
dd_Smed_v6_592_0	0.397947	0.682547	1.71517	3.15778	0.990912
dd_Smed_v6_153_0	0.626223	0.974618	1.55634	3.14897	0.990835	UBE2D2	Homo sapiens	ubiquitin conjugating enzyme E2 D2	NP_003330.1
dd_Smed_v6_3519_0	0.596296	0.966008	1.62001	3.14261	0.990779	DPYSL5	Homo sapiens	dihydropyrimidinase like 5	NP_064519.2
dd_Smed_v6_36_0	1.93776	2.51219	1.29644	3.13725	0.990732	YWHAE	Homo sapiens	tyrosine 3-monooxygenase/tryptophan 5-monooxygenase activation protein epsilon	NP_006752.1
dd_Smed_v6_1771_0	0.233811	0.452229	1.93417	3.13667	0.990727	PSMB1	Homo sapiens	proteasome subunit beta 1	NP_002784.1
dd_Smed_v6_8116_0	0.651442	0.994326	1.52635	3.13645	0.990725	APEH	Homo sapiens	acylaminoacyl-peptide hydrolase	XP_005265155.1
dd_Smed_v6_1618_0	1.27393	1.86545	1.46432	3.13225	0.990688	TRA2B	Homo sapiens	transformer 2 beta homolog (Drosophila)	NP_001230808.1
dd_Smed_v6_2126_0	0.362453	0.623761	1.72094	3.11147	0.990506	PSMD14	Homo sapiens	proteasome 26S subunit, non-ATPase 14	NP_005796.1
dd_Smed_v6_2065_0	0.167756	0.347581	2.07195	3.11032	0.990496	RBBP7	Homo sapiens	retinoblastoma binding protein 7	NP_002884.1
dd_Smed_v6_4282_0	1.48385	2.16163	1.45677	3.10341	0.99035
dd_Smed_v6_1044_0	0.487503	0.765483	1.57021	3.10166	0.990298	LOC100871037	Apis florea	aldose reductase-like	XP_003696049.1
dd_Smed_v6_114_0	3.62939	4.49513	1.23854	3.08791	0.989888	LOC103305057	Eptesicus fuscus	Y-box-binding protein 3-like	XP_008159993.1
dd_Smed_v6_2572_0	0.185808	0.401262	2.15955	3.07964	0.989641	VPS28	Homo sapiens	VPS28, ESCRT-I subunit	NP_057292.1
dd_Smed_v6_10394_0	0.287513	0.57261	1.99159	3.07492	0.9895	SKI	Homo sapiens	SKI proto-oncogene	NP_003027.1
dd_Smed_v6_4730_0	0.440298	0.878881	1.99611	3.06369	0.989165
dd_Smed_v6_7370_0	0.234952	0.462377	1.96797	3.06066	0.989075
dd_Smed_v6_20966_0	0.685904	1.0517	1.53331	3.05758	0.988983	TIGD1	Homo sapiens	tigger transposable element derived 1	NP_663748.1
dd_Smed_v6_3973_0	0.182981	0.382342	2.08951	3.04729	0.988676	AgaP	Anopheles gambiae str. PEST	AGAP002814-PA	XP_312097.5
dd_Smed_v6_926_1	0.252197	0.481223	1.90813	3.04482	0.988603
dd_Smed_v6_657_0	0.620402	0.9433	1.52046	3.04192	0.988516	kpca	Salmo salar	kinase C alpha type	NP_001134994.1
dd_Smed_v6_2049_0	0.426104	0.698843	1.64008	3.0302	0.988166	MGST3	Homo sapiens	microsomal glutathione S-transferase 3	NP_004519.1
dd_Smed_v6_428_0	0.384991	0.633198	1.64471	3.02366	0.987971	ATP5L	Homo sapiens	ATP synthase, H transporting, mitochondrial Fo complex subunit G	NP_006467.4
dd_Smed_v6_265_0	0.41634	0.680376	1.63418	3.01701	0.987773	Sumo2	Mus musculus	small ubiquitin-like modifier 2	NP_579932.1
dd_Smed_v6_2659_0	0.180794	0.383133	2.11917	3.0108	0.987588	LOC102909511	Peromyscus maniculatus bairdii	chromodomain-helicase-DNA-binding protein 5-like	XP_006984143.1
dd_Smed_v6_1390_0	0.44438	0.723103	1.62722	3.00216	0.98733	CHORDC1	Homo sapiens	cysteine and histidine rich domain containing 1	NP_036256.2
dd_Smed_v6_1899_0	2.61628	3.40641	1.30201	2.99875	0.987228	LUC7L3	Homo sapiens	LUC7 like 3 pre-mRNA splicing factor	XP_005257511.1
dd_Smed_v6_4808_0	0.226108	0.461398	2.0406	2.99871	0.987227	Hist1h2ba	Mus musculus	histone cluster 1, H2ba	NP_783594.1
dd_Smed_v6_3025_0	0.233583	0.450247	1.92757	2.98573	0.98684	U2AF2	Homo sapiens	U2 small nuclear RNA auxiliary factor 2	NP_001012496.1
dd_Smed_v6_11447_0	0.750211	1.09582	1.46069	2.98511	0.986822	CG42613	Drosophila melanogaster	CG42613 gene product from transcript CG42613-RE	NP_001247187.1
dd_Smed_v6_2035_0	0.156322	0.334675	2.14094	2.97538	0.986531	THOC1	Homo sapiens	THO complex 1	NP_005122.2
dd_Smed_v6_7023_0	0.371624	0.753844	2.02851	2.97468	0.98651	NUDCD3	Homo sapiens	NudC domain containing 3	NP_056147.2
dd_Smed_v6_3619_0	0.180368	0.39077	2.16652	2.97334	0.98647	CG8209	Drosophila melanogaster	CG8209 gene product from transcript CG8209-RA	NP_648167.1
dd_Smed_v6_7269_0	0.276159	0.547552	1.98274	2.97298	0.98646
dd_Smed_v6_1047_0	0.182254	0.355965	1.95313	2.97089	0.986397	DAZAP1	Homo sapiens	DAZ associated protein 1	NP_733829.1
dd_Smed_v6_1269_0	0.250054	0.456179	1.82432	2.96291	0.986159	ENPP6	Homo sapiens	ectonucleotide pyrophosphatase/phosphodiesterase 6	NP_699174.1
dd_Smed_v6_6621_0	0.359991	0.629621	1.74899	2.95855	0.986029	Gtf2f1	Mus musculus	general transcription factor IIF, polypeptide 1	NP_598562.1
dd_Smed_v6_3847_0	0.34468	0.606521	1.75967	2.95412	0.985897	atf6	Cynoglossus semilaevis	activating transcription factor 6	XP_008334680.1
dd_Smed_v6_7366_0	0.425328	0.829401	1.95003	2.95212	0.985837
dd_Smed_v6_1950_0	0.263491	0.487731	1.85103	2.95038	0.985785	XPA	Homo sapiens	xeroderma pigmentosum, complementation group A	NP_000371.1
dd_Smed_v6_2384_0	0.209675	0.385504	1.83858	2.94412	0.985599	API5	Homo sapiens	apoptosis inhibitor 5	NP_006586.1
dd_Smed_v6_1322_0	0.416208	0.731771	1.75819	2.94379	0.985589	MAPRE1	Homo sapiens	microtubule associated protein RP/EB family member 1	NP_036457.1
dd_Smed_v6_2005_0	0.174375	0.351954	2.01837	2.92871	0.985139	CPSF3	Homo sapiens	cleavage and polyadenylation specific factor 3	NP_057291.1
dd_Smed_v6_2932_0	0.370064	0.619196	1.67321	2.9271	0.985091	Sf3b2	Mus musculus	splicing factor 3b, subunit 2	NP_084385.2
dd_Smed_v6_9349_0	0.209347	0.507088	2.42224	2.92515	0.985033
dd_Smed_v6_5882_0	0.176751	0.369483	2.09041	2.92447	0.985013	LOC102078150	Oreochromis niloticus	uncharacterized LOC102078150	XP_005466259.1
dd_Smed_v6_1183_0	0.903763	1.31395	1.45387	2.92088	0.984905	EIF1B	Homo sapiens	eukaryotic translation initiation factor 1B	NP_005866.1
dd_Smed_v6_5108_0	0.297982	0.533114	1.78908	2.91934	0.98486	SART1	Homo sapiens	squamous cell carcinoma antigen recognized by T-cells 1	NP_005137.1
dd_Smed_v6_176_0	1.22402	1.66686	1.36179	2.91227	0.984649	UBA52	Homo sapiens	ubiquitin A-52 residue ribosomal protein fusion product 1	NP_003324.1
dd_Smed_v6_3961_0	0.30445	0.548404	1.8013	2.89927	0.984261	TDRKH	Homo sapiens	tudor and KH domain containing	NP_006853.2
dd_Smed_v6_3095_0	0.265141	0.47927	1.80761	2.89544	0.984147	CLASRP	Homo sapiens	CLK4 associating serine/arginine rich protein	NP_008987.2
dd_Smed_v6_1932_0	0.38128	0.622476	1.63259	2.88755	0.983911	RBM39	Homo sapiens	RNA binding motif protein 39	NP_001229529.1
dd_Smed_v6_822_0	1.02812	1.45397	1.41421	2.88531	0.983844	Tsp	Trichinella spiralis	tropomyosin	XP_003372651.1
dd_Smed_v6_8540_0	0.135191	0.294917	2.18149	2.87965	0.983646
dd_Smed_v6_1696_0	0.190805	0.381558	1.99973	2.86875	0.983228	CRYL1	Homo sapiens	crystallin lambda 1	NP_057058.2
dd_Smed_v6_201_0	0.723421	1.06545	1.4728	2.86681	0.983154	RPS15	Homo sapiens	ribosomal protein S15	NP_001009.1
dd_Smed_v6_3290_0	0.167309	0.347716	2.07829	2.8653	0.983096	AK2	Homo sapiens	adenylate kinase 2	NP_037543.1
dd_Smed_v6_2899_0	0.699892	1.08923	1.55629	2.85878	0.982846	TPR	Homo sapiens	translocated promoter region, nuclear basket protein	NP_003283.2
dd_Smed_v6_731_0	0.668726	0.971449	1.45269	2.85756	0.982799	ATP5A1	Homo sapiens	ATP synthase, H transporting, mitochondrial F1 complex, alpha subunit 1, cardiac muscle	NP_004037.1
dd_Smed_v6_8814_0	0.739483	1.0612	1.43505	2.84996	0.982508	Art7	Drosophila melanogaster	Arginine methyltransferase 7	NP_611753.4
dd_Smed_v6_7442_0	1.26384	1.99609	1.57939	2.84781	0.982425
dd_Smed_v6_301_0	0.637817	0.934636	1.46537	2.83748	0.982029	CNBP	Homo sapiens	CCHC-type zinc finger nucleic acid binding protein	NP_001120666.1
dd_Smed_v6_976_0	0.261443	0.473337	1.81048	2.83695	0.982009	Sub1	Mus musculus	SUB1 homolog (S. cerevisiae)	NP_035424.1
dd_Smed_v6_3355_0	0.579407	0.872937	1.50661	2.82663	0.981613	SMARCA5	Homo sapiens	SWI/SNF related, matrix associated, actin dependent regulator of chromatin, subfamily a, member 5	NP_003592.3
dd_Smed_v6_1839_0	0.346806	0.589669	1.70029	2.82482	0.981544	PRPF38B	Homo sapiens	pre-mRNA processing factor 38B	NP_060531.2
dd_Smed_v6_9343_0	0.244978	0.440946	1.79994	2.81749	0.981263	CREBBP	Homo sapiens	CREB binding protein	NP_001073315.1
dd_Smed_v6_1056_0	0.241269	0.444397	1.84191	2.81191	0.981049	SNRPF	Homo sapiens	small nuclear ribonucleoprotein polypeptide F	NP_003086.1
dd_Smed_v6_860_0	0.422608	0.68047	1.61017	2.80886	0.980932	Alyref2	Mus musculus	Aly/REF export factor 2	NP_062357.3
dd_Smed_v6_3089_0	0.185526	0.364061	1.96232	2.79872	0.980543	Dsp1	Drosophila melanogaster	Dorsal switch protein 1	NP_727960.1
dd_Smed_v6_3861_0	0.31339	0.545132	1.73947	2.79587	0.980434	AGO2	Homo sapiens	argonaute 2, RISC catalytic component	NP_036286.2
dd_Smed_v6_5816_0	0.167416	0.347667	2.07667	2.78709	0.980098	NAA40	Homo sapiens	N(alpha)-acetyltransferase 40, NatD catalytic subunit	NP_079047.2
dd_Smed_v6_3743_0	0.324017	0.599297	1.84959	2.78633	0.980068	DDX17	Homo sapiens	DEAD (Asp-Glu-Ala-Asp) box helicase 17	NP_006377.2
dd_Smed_v6_1370_0	1.12987	1.7044	1.5085	2.78419	0.979987	EWSR1	Chelonia mydas	EWS RNA-binding protein 1	XP_007070918.1
dd_Smed_v6_9896_0	0.810751	1.14282	1.40959	2.77985	0.97982	ZMYND11	Homo sapiens	zinc finger, MYND-type containing 11	NP_001189397.1
dd_Smed_v6_6521_0	0.870261	1.29847	1.49205	2.77952	0.979807	ASH1L	Homo sapiens	ASH1 like histone lysine methyltransferase	NP_060959.2
dd_Smed_v6_4387_0	0.195739	0.368537	1.8828	2.77784	0.979743	SYMPK	Homo sapiens	symplekin	NP_004810.2
dd_Smed_v6_9063_0	0.621822	0.933508	1.50125	2.77572	0.979662
dd_Smed_v6_2201_0	4.2902	5.65222	1.31747	2.77343	0.979574	Hormad2	Mus musculus	HORMA domain containing 2	NP_083734.1
dd_Smed_v6_1626_0	0.964748	1.37638	1.42667	2.77334	0.97957	MYO1E	Homo sapiens	myosin IE	NP_004989.2
dd_Smed_v6_3500_0	0.267703	0.52387	1.95691	2.7637	0.979201	MTSS1L	Homo sapiens	metastasis suppressor 1-like	NP_612392.1
dd_Smed_v6_392_0	1.58203	2.05587	1.29951	2.76015	0.979065	Ybx3	Mus musculus	Y box protein 3	NP_620817.2
dd_Smed_v6_2560_0	0.343365	0.582094	1.69526	2.76014	0.979065	LOC101078428	Takifugu rubripes	pre-mRNA 3'-end-processing factor FIP1-like	XP_003976601.1
dd_Smed_v6_4209_0	0.301387	0.537979	1.78501	2.74174	0.978359
dd_Smed_v6_1979_0	0.276586	0.464899	1.68085	2.73275	0.978015	LOC101863907	Aplysia californica	prefoldin subunit 1-like	XP_005100817.1
dd_Smed_v6_464_0	0.977381	1.31372	1.34413	2.72519	0.977725	CYCS	Homo sapiens	cytochrome c, somatic	NP_061820.1
dd_Smed_v6_3793_0	0.651333	0.933676	1.43349	2.72206	0.977605	CRKL	Homo sapiens	v-crk avian sarcoma virus CT10 oncogene homolog-like	NP_005198.1
dd_Smed_v6_136_0	1.06958	1.47072	1.37505	2.72202	0.977603	TPT1	Homo sapiens	tumor protein, translationally-controlled 1	NP_001273201.1
dd_Smed_v6_1025_0	0.397636	0.616364	1.55007	2.70403	0.976914	TCP1	Homo sapiens	t-complex 1	NP_110379.2
dd_Smed_v6_5907_0	0.289428	0.532012	1.83815	2.6994	0.976736
dd_Smed_v6_4650_0	0.20124	0.381185	1.89418	2.69873	0.976711
dd_Smed_v6_1341_0	0.41879	0.645342	1.54097	2.69825	0.976692	FAM32A	Homo sapiens	family with sequence similarity 32 member A	NP_054796.1
dd_Smed_v6_3615_0	0.405361	0.653316	1.61169	2.69698	0.976644	LOC101066817	Takifugu rubripes	zinc finger CCCH domain-containing protein 14-like	XP_003971750.1
dd_Smed_v6_403_0	0.665814	0.965097	1.4495	2.69698	0.976643	NEDD8	Homo sapiens	neural precursor cell expressed, developmentally down-regulated 8	NP_006147.1
dd_Smed_v6_1695_0	0.392883	0.637365	1.62228	2.69497	0.976566	SRSF10	Homo sapiens	serine/arginine-rich splicing factor 10	NP_001177938.1
dd_Smed_v6_3120_0	0.19742	0.37094	1.87894	2.69138	0.976429	NDUFB5	Homo sapiens	NADH:ubiquinone oxidoreductase subunit B5	NP_002483.1
dd_Smed_v6_1355_1	0.223624	0.401319	1.79462	2.67454	0.975783	GPATCH4	Homo sapiens	G-patch domain containing 4	NP_872620.1
dd_Smed_v6_3300_0	0.505601	0.789356	1.56122	2.67198	0.975685
dd_Smed_v6_5443_0	0.268822	0.464506	1.72794	2.67061	0.975633	SLU7	Homo sapiens	SLU7 homolog, splicing factor	NP_006416.3
dd_Smed_v6_5878_0	0.190498	0.362633	1.90361	2.65767	0.975141
dd_Smed_v6_1222_0	0.487871	0.74563	1.52833	2.6566	0.975103	Psmc1	Mus musculus	protease (prosome, macropain) 26S subunit, ATPase 1	NP_032973.1
dd_Smed_v6_2182_0	0.278431	0.484709	1.74086	2.65251	0.97496	POLR2B	Homo sapiens	polymerase (RNA) II (DNA directed) polypeptide B, 140kDa	NP_000929.1
dd_Smed_v6_2023_0	0.177634	0.351725	1.98005	2.64726	0.974777	SF3B5	Homo sapiens	splicing factor 3b subunit 5	NP_112577.1
dd_Smed_v6_11245_0	0.243593	0.501845	2.06018	2.6465	0.974751	LOC101863095	Aplysia californica	atherin-like	XP_005095868.1
dd_Smed_v6_3943_0	0.168425	0.324817	1.92856	2.64612	0.974737	LOC101243394	Ciona intestinalis	nucleoporin GLE1-like	XP_004227314.1
dd_Smed_v6_3159_0	0.366825	0.607521	1.65616	2.64599	0.974733	THOC2	Homo sapiens	THO complex 2	NP_001075019.1
dd_Smed_v6_1484_0	0.303542	0.525473	1.73114	2.64116	0.974564	PCSK1	Homo sapiens	proprotein convertase subtilisin/kexin type 1	NP_001171346.1
dd_Smed_v6_8085_0	0.176951	0.345823	1.95434	2.63996	0.974522	CACTIN	Homo sapiens	cactin, spliceosome C complex subunit	NP_001074012.1
dd_Smed_v6_8671_0	0.343134	0.571029	1.66416	2.63342	0.974294
dd_Smed_v6_3473_0	0.190251	0.358825	1.88606	2.63241	0.974259	SMARCA1	Homo sapiens	SWI/SNF related, matrix associated, actin dependent regulator of chromatin, subfamily a, member 1	NP_001269804.1
dd_Smed_v6_2040_0	0.584044	0.855222	1.46431	2.62819	0.974111	DPYSL3	Homo sapiens	dihydropyrimidinase like 3	NP_001378.1
dd_Smed_v6_3115_0	0.177274	0.337484	1.90375	2.62146	0.973876	Gatad2a	Mus musculus	GATA zinc finger domain containing 2A	XP_006509701.1
dd_Smed_v6_2086_0	0.349673	0.578779	1.6552	2.61941	0.973805	Ppm1g	Mus musculus	protein phosphatase 1G (formerly 2C), magnesium-dependent, gamma isoform	NP_032040.1
dd_Smed_v6_417_1	0.524772	0.779596	1.48559	2.61255	0.973565
dd_Smed_v6_967_0	0.255211	0.437727	1.71515	2.60658	0.973357	NOP10	Homo sapiens	NOP10 ribonucleoprotein	NP_061118.1
dd_Smed_v6_1236_0	0.19531	0.355642	1.82091	2.60315	0.973237	NTMT1	Homo sapiens	N-terminal Xaa-Pro-Lys N-methyltransferase 1	NP_054783.2
dd_Smed_v6_1146_0	0.248683	0.451456	1.81539	2.60263	0.973219	ERH	Homo sapiens	enhancer of rudimentary homolog (Drosophila)	NP_004441.1
dd_Smed_v6_3294_1	0.745725	1.1176	1.49867	2.60041	0.973141	LRWD1	Homo sapiens	leucine-rich repeats and WD repeat domain containing 1	XP_005250261.1
dd_Smed_v6_1301_0	1.50243	1.97632	1.31542	2.58403	0.972569
dd_Smed_v6_928_0	0.512582	0.770403	1.50298	2.58314	0.972538	CBX1	Homo sapiens	chromobox 1	NP_006798.1
dd_Smed_v6_3365_0	0.1389	0.282765	2.03574	2.58241	0.972513	ITGA5	Eptesicus fuscus	integrin, alpha 5 (fibronectin receptor, alpha polypeptide)	XP_008139025.1
dd_Smed_v6_2600_0	0.197378	0.373867	1.89416	2.57685	0.972319	NDUFA8	Homo sapiens	NADH:ubiquinone oxidoreductase subunit A8	NP_055037.1
dd_Smed_v6_6061_0	0.172664	0.335012	1.94026	2.56989	0.972076	C1orf50	Homo sapiens	chromosome 1 open reading frame 50	NP_077002.2
dd_Smed_v6_3917_0	0.825139	1.21164	1.46841	2.56525	0.971914	FMNL2	Homo sapiens	formin-like 2	XP_006712292.1
dd_Smed_v6_1646_0	0.279719	0.460497	1.64629	2.56314	0.97184	HMGB1	Homo sapiens	high mobility group box 1	XP_005266425.1
dd_Smed_v6_622_0	0.122814	0.255838	2.08313	2.56022	0.971738	SNRPG	Homo sapiens	small nuclear ribonucleoprotein polypeptide G	NP_003087.1
dd_Smed_v6_1844_0	0.292802	0.487501	1.66495	2.55981	0.971724	Best4	Drosophila melanogaster	Bestrophin 4	NP_001097609.1
dd_Smed_v6_2688_0	0.192541	0.370796	1.9258	2.55591	0.971588	CTNNB1	Homo sapiens	catenin beta 1	NP_001895.1
dd_Smed_v6_347_0	0.447528	0.677074	1.51292	2.5543	0.971531	YBX2	Homo sapiens	Y-box binding protein 2	NP_057066.2
dd_Smed_v6_5424_0	0.20644	0.388958	1.88413	2.5444	0.971186
dd_Smed_v6_5860_0	0.235693	0.45739	1.94062	2.53527	0.970867	MTA3	Homo sapiens	metastasis associated 1 family member 3	NP_065795.1
dd_Smed_v6_3958_0	0.177733	0.340324	1.91481	2.53331	0.970798	Gars	Mus musculus	glycyl-tRNA synthetase	NP_851009.2
dd_Smed_v6_2383_0	1.58502	2.32244	1.46524	2.52722	0.970586
dd_Smed_v6_1094_0	0.234477	0.400671	1.70878	2.51541	0.970174	NUBP2	Homo sapiens	nucleotide binding protein 2	NP_036357.1
dd_Smed_v6_5857_0	0.658341	0.947707	1.43954	2.51468	0.970148	PPP2R2A	Homo sapiens	protein phosphatase 2 regulatory subunit Balpha	NP_002708.1
dd_Smed_v6_1603_0	0.16223	0.312352	1.92537	2.51406	0.970127				WP_026261145.1
dd_Smed_v6_7187_0	0.243702	0.450681	1.84931	2.51377	0.970116
dd_Smed_v6_1274_1	0.363869	0.574377	1.57853	2.50363	0.969763	EIF5B	Homo sapiens	eukaryotic translation initiation factor 5B	NP_056988.3
dd_Smed_v6_346_0	1.17034	1.53811	1.31424	2.50228	0.969715	PURA	Homo sapiens	purine-rich element binding protein A	NP_005850.1
dd_Smed_v6_1416_0	0.475351	0.713937	1.50192	2.50208	0.969708	AT1G23280	Arabidopsis thaliana	MAK16 protein-like protein	NP_173742.1
dd_Smed_v6_3997_0	0.524957	0.793438	1.51143	2.50148	0.969687	CCAR1	Homo sapiens	cell division cycle and apoptosis regulator 1	NP_060707.2
dd_Smed_v6_2747_0	0.124828	0.266683	2.13641	2.49909	0.969604	SCO1	Homo sapiens	SCO1 cytochrome c oxidase assembly protein	XP_005256808.1
dd_Smed_v6_969_0	0.235816	0.417866	1.772	2.4917	0.969346	SELT	Homo sapiens	selenoprotein T	NP_057359.2
dd_Smed_v6_1063_0	0.365027	0.579147	1.58658	2.48424	0.969086	Ctbp2	Mus musculus	C-terminal binding protein 2	XP_006507378.1
dd_Smed_v6_1549_0	0.146069	0.296697	2.03121	2.47289	0.968689
dd_Smed_v6_6081_0	0.287304	0.530098	1.84508	2.4691	0.968557	LMJF	Leishmania major strain Friedlin	putative protein kinase	XP_001681155.1
dd_Smed_v6_1482_0	0.204222	0.371134	1.81731	2.46659	0.968469	SPCS2	Homo sapiens	signal peptidase complex subunit 2	NP_055567.2
dd_Smed_v6_1760_0	0.26597	0.469699	1.76598	2.4654	0.968428	TRA2A	Homo sapiens	transformer 2 alpha homolog (Drosophila)	NP_001269686.1
dd_Smed_v6_2641_0	0.267072	0.443109	1.65914	2.46379	0.968371	SEPT7	Homo sapiens	septin 7	NP_001779.3
dd_Smed_v6_758_0	0.362127	0.584231	1.61333	2.4582	0.968176	AgaP	Anopheles gambiae str. PEST	AGAP010206-PA	XP_554113.3
dd_Smed_v6_4815_0	0.402124	0.649106	1.6142	2.45178	0.967952	DHX9	Homo sapiens	DEAH-box helicase 9	NP_001348.2
dd_Smed_v6_560_0	0.326932	0.51692	1.58112	2.45159	0.967945	BANF1	Homo sapiens	barrier to autointegration factor 1	NP_003851.1
dd_Smed_v6_2352_0	0.181493	0.328675	1.81095	2.45075	0.967916	TUSC3	Homo sapiens	tumor suppressor candidate 3	XP_005273703.1
dd_Smed_v6_4070_0	0.350732	0.572711	1.6329	2.44296	0.967644	RNF40	Homo sapiens	ring finger protein 40	NP_001193963.1
dd_Smed_v6_3805_0	0.510867	0.754633	1.47716	2.44258	0.967631	CG7971	Drosophila melanogaster	CG7971 gene product from transcript CG7971-RC	NP_647642.2
dd_Smed_v6_2109_1	0.329194	0.530381	1.61115	2.43292	0.967308	DAD1	Homo sapiens	defender against cell death 1	NP_001335.1
dd_Smed_v6_443_0	0.313277	0.507062	1.61858	2.43203	0.967284	FTH1	Homo sapiens	ferritin, heavy polypeptide 1	NP_002023.2
dd_Smed_v6_6141_0	0.196902	0.357474	1.81549	2.42605	0.967128	CLK2	Homo sapiens	CDC like kinase 2	XP_005244935.1
dd_Smed_v6_2597_0	1.45339	1.90288	1.30927	2.42434	0.967083	CHD2	Homo sapiens	chromodomain helicase DNA binding protein 2	NP_001262.3
dd_Smed_v6_3450_0	0.406184	0.655533	1.61388	2.42334	0.967057	PTBP1	Homo sapiens	polypyrimidine tract binding protein 1	NP_002810.1
dd_Smed_v6_745_0	0.397321	0.605123	1.52301	2.41657	0.966879	ATP5B	Homo sapiens	ATP synthase, H transporting, mitochondrial F1 complex, beta polypeptide	NP_001677.2
dd_Smed_v6_2221_0	0.150721	0.295942	1.96351	2.4134	0.966796	HSPA8	Homo sapiens	heat shock protein family A (Hsp70) member 8	NP_006588.1
dd_Smed_v6_4160_0	0.274342	0.462938	1.68745	2.41098	0.966733	TAOK1	Homo sapiens	TAO kinase 1	NP_079418.1
dd_Smed_v6_1475_0	0.791705	1.08527	1.37081	2.40645	0.966614	Dip-B	Drosophila melanogaster	Dipeptidase B	NP_650318.1
dd_Smed_v6_1449_0	0.29744	0.478435	1.60851	2.39881	0.966414	PSMD3	Homo sapiens	proteasome 26S subunit, non-ATPase 3	NP_002800.2
dd_Smed_v6_206_0	0.404943	0.61692	1.52348	2.39125	0.966216	EEF1B2	Homo sapiens	eukaryotic translation elongation factor 1 beta 2	NP_001950.1
dd_Smed_v6_282_0	0.742472	1.00737	1.35678	2.38572	0.966071
dd_Smed_v6_6659_0	0.209983	0.360326	1.71598	2.38397	0.966025	Bathy16g02080	Bathycoccus prasinos	PREDICTED: similar to Zinc finger protein 271 (Zinc finger protein 7) (HZF7) (Zinc finger protein ZNFphex133) (Epstein-Barr virus-induced zinc finger protein) (ZNF-EB) (CT-ZFP48) (Zinc finger protein	XP_007508705.1
dd_Smed_v6_1524_0	0.372022	0.563588	1.51493	2.37845	0.965881	NDUFA9	Homo sapiens	NADH:ubiquinone oxidoreductase subunit A9	NP_004993.1
dd_Smed_v6_2338_0	0.256067	0.4251	1.66011	2.36982	0.965655
dd_Smed_v6_1535_0	0.188192	0.358066	1.90266	2.36756	0.965596	UBE2I	Homo sapiens	ubiquitin conjugating enzyme E2 I	NP_003336.1
dd_Smed_v6_415_0	2.24475	2.74517	1.22293	2.36616	0.965559	XBP1	Homo sapiens	X-box binding protein 1	NP_005071.2
dd_Smed_v6_3404_1	1.28729	1.73776	1.34994	2.36469	0.965521	AKAP17A	Homo sapiens	A-kinase anchoring protein 17A	NP_005079.2
dd_Smed_v6_348_0	0.0255619	0.35487	13.8827	2.36372	0.965495	PPIC	Homo sapiens	peptidylprolyl isomerase C	NP_000934.1
dd_Smed_v6_8804_0	0.136615	0.260296	1.90532	2.35971	0.96539
dd_Smed_v6_1350_0	0.136837	0.278617	2.03613	2.35146	0.965174
dd_Smed_v6_631_0	0.657932	0.943499	1.43404	2.35126	0.965169
dd_Smed_v6_429_0	0.570425	0.795983	1.39542	2.34995	0.965134	SEC61G	Homo sapiens	Sec61 translocon gamma subunit	NP_055117.1
dd_Smed_v6_1669_0	0.172831	0.310407	1.79601	2.34888	0.965106	PSMB4	Homo sapiens	proteasome subunit beta 4	NP_002787.2
dd_Smed_v6_1872_0	0.640901	0.894695	1.396	2.34451	0.964992	SRRT	Homo sapiens	serrate, RNA effector molecule	XP_006716086.1
dd_Smed_v6_401_0	0.577683	0.814335	1.40966	2.34404	0.96498	Atp5g1	Mus musculus	ATP synthase, H transporting, mitochondrial F0 complex, subunit C1 (subunit 9)	NP_031532.2
dd_Smed_v6_250_0	1.5148	1.94261	1.28242	2.34231	0.964935	P4HB	Homo sapiens	prolyl 4-hydroxylase, beta polypeptide	NP_000909.2
dd_Smed_v6_1517_0	0.452006	0.695378	1.53843	2.34171	0.964919	GSTM4	Homo sapiens	glutathione S-transferase mu 4	NP_000841.1
dd_Smed_v6_1945_0	0.284463	0.471781	1.6585	2.34137	0.96491	DHX38	Homo sapiens	DEAH-box helicase 38	NP_054722.2
dd_Smed_v6_955_0	0.378085	0.559385	1.47952	2.339	0.964848	dap	Xenopus laevis	death-associated protein	NP_001079599.1
dd_Smed_v6_2695_0	0.522177	0.754051	1.44405	2.33602	0.96477	CTR9	Homo sapiens	CTR9 homolog, Paf1/RNA polymerase II complex component	NP_055448.1
dd_Smed_v6_1075_0	0.250172	0.417041	1.66702	2.3267	0.964525	UBE2N	Homo sapiens	ubiquitin-conjugating enzyme E2N	NP_003339.1
dd_Smed_v6_1685_0	0.258481	0.41947	1.62282	2.32069	0.964368	NCSTN	Homo sapiens	nicastrin	NP_056146.1
dd_Smed_v6_3382_0	0.177919	0.30692	1.72506	2.31357	0.964182	PRPF38A	Homo sapiens	pre-mRNA processing factor 38A	NP_116253.2
dd_Smed_v6_7085_0	0.505362	0.831776	1.6459	2.31022	0.964094	KHNYN	Homo sapiens	KH and NYN domain containing	NP_056114.1
dd_Smed_v6_4452_0	0.171562	0.310662	1.81079	2.30575	0.963977	LOC100892829	Strongylocentrotus purpuratus	uncharacterized LOC100892829	XP_003731181.1
dd_Smed_v6_1036_0	0.16661	0.293265	1.76019	2.30188	0.963875	UBE2V1	Homo sapiens	ubiquitin conjugating enzyme E2 V1	NP_001027459.1
dd_Smed_v6_4684_0	0.252297	0.448123	1.77618	2.30055	0.963841	CHERP	Homo sapiens	calcium homeostasis endoplasmic reticulum protein	NP_006378.3
dd_Smed_v6_3722_0	0.37841	0.601308	1.58904	2.29892	0.963798	RASSF8	Homo sapiens	Ras association domain family member 8	NP_009142.2
dd_Smed_v6_3995_0	1.35606	1.8605	1.37199	2.28819	0.963517	MTA3	Homo sapiens	metastasis associated 1 family member 3	NP_065795.1
dd_Smed_v6_2618_0	0.177682	0.319183	1.79637	2.2881	0.963515	NAV2	Homo sapiens	neuron navigator 2	XP_005253271.1
dd_Smed_v6_815_0	0.42395	0.650899	1.53532	2.28597	0.963459
dd_Smed_v6_2026_0	0.160025	0.279655	1.74757	2.27946	0.963288	LOC100178481	Ciona intestinalis	TNF receptor-associated factor 3-like	XP_002121961.1
dd_Smed_v6_966_0	0.165979	0.300627	1.81124	2.27852	0.963264	EIF5A	Homo sapiens	eukaryotic translation initiation factor 5A	NP_001961.1
dd_Smed_v6_8099_0	0.196767	0.355068	1.80451	2.27292	0.963117	ZGPAT	Homo sapiens	zinc finger CCCH-type and G-patch domain containing	NP_115916.3
dd_Smed_v6_938_0	0.325221	0.504617	1.55161	2.26635	0.962945	SRPRB	Homo sapiens	SRP receptor beta subunit	NP_067026.3
dd_Smed_v6_17458_0	0.161993	0.28427	1.75483	2.26361	0.962873
dd_Smed_v6_2060_0	0.22272	0.379212	1.70264	2.2576	0.962716	SSSCA1	Homo sapiens	Sjogren syndrome/scleroderma autoantigen 1	NP_006387.1
dd_Smed_v6_3563_0	0.166461	0.293073	1.76061	2.25693	0.962698	FAM210A	Homo sapiens	family with sequence similarity 210, member A	NP_689565.2
dd_Smed_v6_10073_0	0.31494	0.550873	1.74914	2.25249	0.962582
dd_Smed_v6_4605_0	0.18586	0.319255	1.71772	2.25207	0.962571	RSBN1L	Homo sapiens	round spermatid basic protein 1 like	NP_940869.2
dd_Smed_v6_863_0	0.544715	0.791694	1.45341	2.24802	0.962465	HADHA	Homo sapiens	hydroxyacyl-CoA dehydrogenase/3-ketoacyl-CoA thiolase/enoyl-CoA hydratase (trifunctional protein), alpha subunit	NP_000173.2
dd_Smed_v6_14195_0	0.176239	0.297984	1.69079	2.24566	0.962403
dd_Smed_v6_8181_0	0.196108	0.328977	1.67753	2.2442	0.962365	DHX8	Homo sapiens	DEAH-box helicase 8	NP_004932.1
dd_Smed_v6_5365_0	0.496366	0.754348	1.51974	2.24317	0.962338	Syne1	Mus musculus	spectrin repeat containing, nuclear envelope 1	NP_001073154.1
dd_Smed_v6_10311_0	0.270002	0.473062	1.75207	2.24169	0.962299	BPTF	Homo sapiens	bromodomain PHD finger transcription factor	NP_872579.2
dd_Smed_v6_4714_0	0.298464	0.478246	1.60236	2.24053	0.962269
dd_Smed_v6_4486_0	0.189301	0.332178	1.75476	2.24033	0.962263	TNIK	Homo sapiens	TRAF2 and NCK interacting kinase	XP_006713618.1
dd_Smed_v6_697_0	0.990685	1.29523	1.3074	2.23643	0.962161	LOC102225331	Xiphophorus maculatus	plasminogen activator inhibitor 1 RNA-binding protein-like	XP_005795746.1
dd_Smed_v6_2793_0	0.236078	0.44278	1.87557	2.23605	0.962151	SLC39A7	Homo sapiens	solute carrier family 39 member 7	NP_001275706.1
dd_Smed_v6_4731_0	0.149515	0.276955	1.85236	2.23556	0.962138
dd_Smed_v6_6379_0	0.142772	0.270434	1.89417	2.23472	0.962116
dd_Smed_v6_3816_0	0.785366	1.0448	1.33034	2.23317	0.962076	LOC103393708	Cynoglossus semilaevis	probable ATP-dependent RNA helicase DDX5	XP_008328999.1
dd_Smed_v6_8286_0	0.380416	0.577266	1.51746	2.23018	0.961997	Strn3	Mus musculus	striatin, calmodulin binding protein 3	XP_006516474.1
dd_Smed_v6_1485_0	0.765491	1.11655	1.4586	2.2291	0.961969	HNRNPUL1	Homo sapiens	heterogeneous nuclear ribonucleoprotein U like 1	XP_005258520.1
dd_Smed_v6_5085_0	0.246127	0.391427	1.59034	2.22882	0.961962	LOC101741792	Bombyx mori	SWI/SNF-related matrix-associated actin-dependent regulator of chromatin subfamily E member 1-like	XP_004922664.1
dd_Smed_v6_3319_0	0.240722	0.399791	1.6608	2.22543	0.961873	VBP1	Homo sapiens	von Hippel-Lindau binding protein 1	NP_003363.1
dd_Smed_v6_2700_0	0.328495	0.512552	1.56031	2.22281	0.961805	TMEM57	Homo sapiens	transmembrane protein 57	XP_005245988.1
dd_Smed_v6_6532_0	0.143323	0.275617	1.92304	2.22227	0.96179	Poldip3	Mus musculus	polymerase (DNA-directed), delta interacting protein 3	XP_006521548.1
dd_Smed_v6_3029_0	0.338656	0.593069	1.75124	2.21892	0.961703	U2SURP	Homo sapiens	U2 snRNP associated SURP domain containing	XP_005247305.1
dd_Smed_v6_1279_0	0.150264	0.268897	1.7895	2.21671	0.961645	PSMC4	Homo sapiens	proteasome 26S subunit, ATPase 4	NP_006494.1
dd_Smed_v6_3064_0	0.20966	0.341613	1.62937	2.2138	0.961568	ADD1	Homo sapiens	adducin 1	NP_001110.2
dd_Smed_v6_5573_0	0.221554	0.363264	1.63962	2.21115	0.961499	RBM22	Homo sapiens	RNA binding motif protein 22	NP_060517.1
dd_Smed_v6_3678_0	0.167661	0.292967	1.74738	2.21022	0.961475	LDB1	Homo sapiens	LIM domain binding 1	NP_003884.1
dd_Smed_v6_1590_0	0.218278	0.384479	1.76142	2.20764	0.961917
dd_Smed_v6_3492_0	0.316457	0.493956	1.56089	2.20275	0.962757	SUPT5H	Homo sapiens	SPT5 homolog, DSIF elongation factor subunit	NP_003160.2
dd_Smed_v6_5073_0	0.287167	0.498422	1.73565	2.2018	0.96292	BMS1	Homo sapiens	BMS1 ribosome biogenesis factor	XP_005271906.1
dd_Smed_v6_9090_0	0.168525	0.30242	1.79451	2.19491	0.964103	Chd5	Mus musculus	chromodomain helicase DNA binding protein 5	NP_083492.2
dd_Smed_v6_23_0	1.2209	1.62604	1.33184	2.1928	0.964466	ATP5G2	Homo sapiens	ATP synthase, H transporting, mitochondrial Fo complex subunit C2 (subunit 9)	NP_001002031.1
dd_Smed_v6_310_0	0.353219	0.536049	1.51761	2.19264	0.964493	Dynll2	Mus musculus	dynein light chain LC8-type 2	NP_080832.1
dd_Smed_v6_5071_0	0.172155	0.306007	1.77751	2.19076	0.964817
dd_Smed_v6_3681_0	1.26227	1.689	1.33807	2.18607	0.965622
dd_Smed_v6_8433_0	0.371012	0.636914	1.7167	2.17912	0.966816	KDM2B	Homo sapiens	lysine (K)-specific demethylase 2B	NP_001005366.1
dd_Smed_v6_8970_0	0.496345	0.895703	1.8046	2.17586	0.967376	LOC100498085	Xenopus tropicalis	zinc finger MYM-type protein 1-like	XP_002943657.1
dd_Smed_v6_2038_0	0.201665	0.327084	1.62192	2.17353	0.967776	ZFAND5	Homo sapiens	zinc finger AN1-type containing 5	NP_005998.1
dd_Smed_v6_3330_0	0.220068	0.362758	1.64839	2.16682	0.968928
dd_Smed_v6_823_0	0.814749	1.08021	1.32582	2.16522	0.969203	UBXN4	Homo sapiens	UBX domain protein 4	NP_055422.1
dd_Smed_v6_1828_0	0.181504	0.308521	1.6998	2.16154	0.969835	LOC101485611	Maylandia zebra	39S ribosomal protein L27, mitochondrial-like	XP_004569764.1
dd_Smed_v6_2244_0	0.239531	0.386275	1.61263	2.16091	0.969943	MIF	Homo sapiens	macrophage migration inhibitory factor (glycosylation-inhibiting factor)	NP_002406.1
dd_Smed_v6_562_0	0.280742	0.424495	1.51205	2.15487	0.970981	SNRPD3	Homo sapiens	small nuclear ribonucleoprotein D3 polypeptide	NP_004166.1
dd_Smed_v6_1051_0	0.723351	0.968829	1.33936	2.14429	0.972798	ENY2	Homo sapiens	enhancer of yellow 2 homolog (Drosophila)	NP_064574.1
dd_Smed_v6_6179_0	0.294693	0.589411	2.00008	2.14211	0.973171
dd_Smed_v6_3968_0	0.541702	0.789295	1.45706	2.13783	0.973907	SUPT6H	Homo sapiens	SPT6 homolog, histone chaperone	NP_003161.2
dd_Smed_v6_9993_0	0.393461	0.650189	1.65249	2.13441	0.974495	SUZ12	Homo sapiens	SUZ12 polycomb repressive complex 2 subunit	XP_006721857.1
dd_Smed_v6_203_0	0.971028	1.22845	1.2651	2.13355	0.974642	ARF1	Homo sapiens	ADP ribosylation factor 1	NP_001649.1
dd_Smed_v6_1176_0	0.373689	0.547688	1.46562	2.12654	0.975846	PSMC5	Homo sapiens	proteasome 26S subunit, ATPase 5	NP_001186092.1
dd_Smed_v6_6728_0	0.145732	0.254651	1.74739	2.11926	0.977097
dd_Smed_v6_1637_0	0.406578	0.593491	1.45972	2.11881	0.977173	FLOT1	Homo sapiens	flotillin 1	NP_005794.1
dd_Smed_v6_3780_0	0.552443	0.833229	1.50826	2.11735	0.977425	RBBP6	Homo sapiens	retinoblastoma binding protein 6	NP_061173.1
dd_Smed_v6_10105_0	0.201894	0.35157	1.74136	2.11612	0.977637
dd_Smed_v6_856_0	0.228009	0.355935	1.56106	2.11577	0.977696	NME2	Homo sapiens	NME/NM23 nucleoside diphosphate kinase 2	NP_002503.1
dd_Smed_v6_6657_0	0.19187	0.318578	1.66038	2.1135	0.978086	SF3B2	Homo sapiens	splicing factor 3b subunit 2	XP_005273783.1
dd_Smed_v6_903_0	0.575984	0.826028	1.43412	2.11111	0.978496	Cct8	Mus musculus	chaperonin containing Tcp1, subunit 8 (theta)	NP_033970.3
dd_Smed_v6_1316_0	0.799117	1.09648	1.37212	2.10419	0.979684	UBE2G2	Homo sapiens	ubiquitin conjugating enzyme E2 G2	NP_001189418.1
dd_Smed_v6_4394_0	0.173122	0.32405	1.8718	2.10131	0.980179	CG34150	Drosophila melanogaster	CG34150 gene product from transcript CG34150-RB	NP_001036756.2
dd_Smed_v6_8003_0	0.186537	0.325338	1.74409	2.10082	0.980263	NEMF	Homo sapiens	nuclear export mediator factor	NP_004704.2
dd_Smed_v6_2378_0	0.396529	0.574341	1.44842	2.09899	0.980578	NDUFB8	Homo sapiens	NADH:ubiquinone oxidoreductase subunit B8	NP_004995.1
dd_Smed_v6_8139_0	0.137764	0.247922	1.79961	2.0925	0.981692
dd_Smed_v6_2527_0	0.182404	0.306286	1.67917	2.09219	0.981745	NAA20	Homo sapiens	N(alpha)-acetyltransferase 20, NatB catalytic subunit	NP_057184.1
dd_Smed_v6_1393_0	0.191539	0.321716	1.67964	2.08962	0.982188	KHDRBS2	Homo sapiens	KH domain containing, RNA binding, signal transduction associated 2	XP_006715418.1
dd_Smed_v6_1102_0	0.147604	0.263128	1.78267	2.08872	0.982342	LOC101738134	Bombyx mori	uncharacterized LOC101738134	XP_004929854.1
dd_Smed_v6_10921_0	0.229699	0.456502	1.9874	2.08864	0.982356	SKI	Homo sapiens	SKI proto-oncogene	NP_003027.1
dd_Smed_v6_4508_0	0.189445	0.304984	1.60988	2.07418	0.984839	Htatsf1	Mus musculus	HIV TAT specific factor 1	NP_082518.1
dd_Smed_v6_4072_0	0.162064	0.273648	1.68851	2.07213	0.985191	OXA1L	Homo sapiens	OXA1L, mitochondrial inner membrane protein	NP_005006.3
dd_Smed_v6_3253_0	0.523772	0.765947	1.46237	2.06946	0.985649
dd_Smed_v6_2100_0	0.433283	0.648737	1.49726	2.06899	0.98573	AgaP	Anopheles gambiae str. PEST	AGAP000321-PA	XP_003436969.1
dd_Smed_v6_4226_0	0.171399	0.294314	1.71713	2.06051	0.987187	PARVB	Homo sapiens	parvin beta	NP_037459.2
dd_Smed_v6_563_0	0.144002	0.262	1.81942	2.05359	0.988375	LOC101736864	Bombyx mori	translation machinery-associated protein 7 homolog	XP_004933296.1
dd_Smed_v6_2628_0	0.733979	0.966201	1.31639	2.04978	0.989029	CDV3	Homo sapiens	CDV3 homolog (mouse)	XP_005247648.1
dd_Smed_v6_4758_0	0.150763	0.259384	1.72047	2.047	0.989507	LIN9	Homo sapiens	lin-9 DREAM MuvB core complex component	NP_001257339.1
dd_Smed_v6_4323_0	0.173988	0.295541	1.69863	2.04137	0.990474
dd_Smed_v6_1569_0	0.234484	0.359704	1.53402	2.03677	0.991264	Pcbp3	Mus musculus	poly(rC) binding protein 3	XP_006513983.1
dd_Smed_v6_1725_0	0.246356	0.383161	1.55532	2.03622	0.991359
dd_Smed_v6_3566_0	0.152679	0.263503	1.72587	2.03534	0.99151	LEO1	Homo sapiens	LEO1 homolog, Paf1/RNA polymerase II complex component	NP_620147.1
dd_Smed_v6_3911_0	0.644622	0.879734	1.36473	2.03439	0.991674
dd_Smed_v6_6551_0	0.204118	0.333983	1.63622	2.03133	0.992198
dd_Smed_v6_2634_0	0.294505	0.451325	1.53249	2.0306	0.992324
dd_Smed_v6_1529_0	0.219693	0.35062	1.59595	2.03052	0.992338	WDR83OS	Homo sapiens	WD repeat domain 83 opposite strand	NP_057229.1
dd_Smed_v6_3006_0	0.170443	0.279134	1.6377	2.02642	0.993041	ADH5	Homo sapiens	alcohol dehydrogenase 5 (class III), chi polypeptide	NP_000662.3
dd_Smed_v6_9275_0	0.202399	0.378312	1.86914	2.02605	0.993105	Mfn1	Mus musculus	mitofusin 1	XP_006535588.1
dd_Smed_v6_2479_0	0.143719	0.275721	1.91848	2.02598	0.993117
dd_Smed_v6_962_0	0.275725	0.416098	1.50911	2.02446	0.993379	YME1L1	Homo sapiens	YME1 like 1 ATPase	NP_001240795.1
dd_Smed_v6_604_0	0.529791	0.716145	1.35175	2.01835	0.994427
dd_Smed_v6_1182_0	0.502732	0.686441	1.36542	2.01807	0.994476
dd_Smed_v6_5502_0	0.124492	0.239968	1.92758	2.01481	0.995036	Tsr1	Mus musculus	TSR1 20S rRNA accumulation	NP_796299.2
dd_Smed_v6_2971_0	0.362249	0.525111	1.44958	2.00778	0.996243	TRA2B	Homo sapiens	transformer 2 beta homolog (Drosophila)	NP_001230808.1
dd_Smed_v6_4345_0	0.146633	0.248117	1.69209	2.007	0.996377	PELO	Homo sapiens	pelota homolog (Drosophila)	NP_057030.3
dd_Smed_v6_3056_0	0.222064	0.354288	1.59543	2.00686	0.996401	Cdc73	Mus musculus	cell division cycle 73, Paf1/RNA polymerase II complex component	NP_666103.1
dd_Smed_v6_4639_0	0.374542	0.60351	1.61133	2.00448	0.996809	DVL2	Homo sapiens	dishevelled segment polarity protein 2	XP_006721532.1
dd_Smed_v6_4611_0	0.858052	1.13419	1.32183	2.00442	0.996821
dd_Smed_v6_1389_0	0.191725	0.322888	1.68412	2.00288	0.997085	NCLN	Homo sapiens	nicalin	XP_005259653.1
dd_Smed_v6_2267_0	0.266904	0.40469	1.51624	2.00277	0.997103	EIF5	Homo sapiens	eukaryotic translation initiation factor 5	NP_001960.2
dd_Smed_v6_6978_0	0.152087	0.258736	1.70123	2.00071	0.997458	SF1	Homo sapiens	splicing factor 1	NP_973727.1
dd_Smed_v6_1966_0	0.311114	0.461259	1.4826	1.99967	0.997635	RSRC2	Homo sapiens	arginine/serine-rich coiled-coil 2	NP_075388.2
dd_Smed_v6_2015_0	0.248776	0.390823	1.57098	1.99829	0.997872	TRAF3	Homo sapiens	TNF receptor associated factor 3	NP_003291.2
dd_Smed_v6_3272_0	0.281184	0.437713	1.55668	1.99783	0.997952	beag	Drosophila melanogaster	CG18005 gene product from transcript CG18005-RA	NP_649865.1
dd_Smed_v6_2849_0	0.322491	0.472796	1.46608	1.99302	0.998777	LARS	Homo sapiens	leucyl-tRNA synthetase	NP_064502.9
dd_Smed_v6_4174_0	0.504424	0.739634	1.46629	1.98897	0.999474
dd_Smed_v6_283_0	0.843563	1.06726	1.26518	1.97756	1	DDX21	Homo sapiens	DEAD-box helicase 21	NP_001243839.1
dd_Smed_v6_7314_0	0.204989	0.330986	1.61465	1.9771	1	NALCN	Homo sapiens	sodium leak channel, non-selective	NP_443099.1
dd_Smed_v6_1315_0	0.367931	0.51402	1.39706	1.97486	1	ETFB	Homo sapiens	electron-transfer-flavoprotein, beta polypeptide	NP_001976.1
dd_Smed_v6_1325_1	0.234095	0.368534	1.57429	1.97337	1
dd_Smed_v6_2573_0	0.126666	0.216286	1.70752	1.97031	1	HCCS	Homo sapiens	holocytochrome c synthase	NP_005324.3
dd_Smed_v6_11409_0	0.300159	0.456031	1.5193	1.96822	1	NEO1	Homo sapiens	neogenin 1	XP_005254470.1
dd_Smed_v6_5017_0	0.344608	0.500499	1.45237	1.96574	1	ETF1	Homo sapiens	eukaryotic translation termination factor 1	NP_004721.1
dd_Smed_v6_7892_3	0.176197	0.313621	1.77994	1.96503	1	LOC103279534	Anolis carolinensis	zinc finger MYM-type protein 1-like	XP_008113471.1
dd_Smed_v6_1458_0	0.267495	0.39104	1.46186	1.96367	1	ACADL	Homo sapiens	acyl-CoA dehydrogenase, long chain	NP_001599.1
dd_Smed_v6_813_0	0.544112	0.739016	1.35821	1.96269	1	RHOA	Homo sapiens	ras homolog family member A	NP_001655.1
dd_Smed_v6_2589_0	0.338346	0.541154	1.59941	1.96062	1	MAP3K7	Homo sapiens	mitogen-activated protein kinase kinase kinase 7	NP_663306.1
dd_Smed_v6_8542_0	0.176137	0.319587	1.81442	1.95673	1	Uvssa	Mus musculus	UV stimulated scaffold protein A	NP_001074570.1
dd_Smed_v6_1672_0	0.179347	0.297553	1.65909	1.95642	1	UCHL5	Homo sapiens	ubiquitin C-terminal hydrolase L5	NP_057068.1
dd_Smed_v6_2332_0	0.195127	0.309784	1.5876	1.95247	1	STRIP1	Homo sapiens	striatin interacting protein 1	NP_149079.2
dd_Smed_v6_4061_0	0.152183	0.291639	1.91637	1.95192	1	U2AF1	Homo sapiens	U2 small nuclear RNA auxiliary factor 1	NP_001020374.1
dd_Smed_v6_538_0	0.278116	0.420858	1.51324	1.94952	1	RPN2	Homo sapiens	ribophorin II	NP_002942.2
dd_Smed_v6_2816_0	0.219245	0.334766	1.5269	1.94485	1	DNLZ	Homo sapiens	DNL-type zinc finger	NP_001074318.1
dd_Smed_v6_621_0	0.268983	0.395259	1.46946	1.93805	1	EIF3K	Homo sapiens	eukaryotic translation initiation factor 3, subunit K	NP_037366.1
dd_Smed_v6_1946_0	0.546692	0.79443	1.45316	1.93249	1	TMEM222	Homo sapiens	transmembrane protein 222	NP_115501.2
dd_Smed_v6_3582_0	0.280397	0.416256	1.48452	1.92997	1	HNRNPDL	Homo sapiens	heterogeneous nuclear ribonucleoprotein D-like	NP_001193929.1
dd_Smed_v6_1965_0	0.432796	0.619556	1.43152	1.92859	1	POLR2A	Homo sapiens	polymerase (RNA) II subunit A	NP_000928.1
dd_Smed_v6_5367_0	0.390173	0.549555	1.40849	1.9245	1	BRD3	Physeter catodon	bromodomain containing 3	XP_007111159.1
dd_Smed_v6_5797_0	0.794944	1.08432	1.36402	1.91637	1	enok	Drosophila melanogaster	enoki mushroom	NP_523838.1
dd_Smed_v6_1250_0	0.232182	0.355184	1.52976	1.91592	1	AFG3L2	Homo sapiens	AFG3 like matrix AAA peptidase subunit 2	NP_006787.2
dd_Smed_v6_17318_0	0.174484	0.280238	1.6061	1.9139	1	LOC101235574	Hydra vulgaris	uncharacterized LOC101235574	XP_004205847.1
dd_Smed_v6_818_0	0.295081	0.42495	1.44012	1.91321	1	TUFM	Homo sapiens	Tu translation elongation factor, mitochondrial	NP_003312.3
dd_Smed_v6_594_0	0.35411	0.498749	1.40846	1.91241	1	DDX5	Homo sapiens	DEAD-box helicase 5	NP_004387.1
dd_Smed_v6_6347_0	0.158151	0.265801	1.68068	1.91074	1
dd_Smed_v6_5568_0	0.232903	0.400401	1.71917	1.90859	1	DUS2	Homo sapiens	dihydrouridine synthase 2	NP_060273.1
dd_Smed_v6_5151_0	0.192296	0.301229	1.56649	1.90708	1	WDR70	Homo sapiens	WD repeat domain 70	NP_060504.1
dd_Smed_v6_3853_0	0.233438	0.395905	1.69597	1.90464	1	LOC101163935	Oryzias latipes	poly(U)-binding-splicing factor PUF60-like	XP_004081203.1
dd_Smed_v6_13429_0	0.212134	0.370123	1.74476	1.90402	1
dd_Smed_v6_9748_0	0.214135	0.351235	1.64025	1.90292	1
dd_Smed_v6_2735_0	0.1702	0.271023	1.59238	1.9016	1	CG9172	Drosophila melanogaster	CG9172 gene product from transcript CG9172-RC	NP_573097.1
dd_Smed_v6_2774_0	0.209764	0.354278	1.68894	1.90008	1	Tex15	Mus musculus	testis expressed gene 15	XP_006509042.1
dd_Smed_v6_11724_0	0.195693	0.327518	1.67363	1.89959	1	WWOX	Homo sapiens	WW domain containing oxidoreductase	NP_057457.1
dd_Smed_v6_402_1	0.159821	0.267781	1.67551	1.89941	1	LOC100178454	Ciona intestinalis	universal stress protein MSMEG_3950/MSMEI_3859-like	XP_002130756.1
dd_Smed_v6_4698_0	0.175543	0.293699	1.67309	1.89618	1	NUP210	Homo sapiens	nucleoporin 210kDa	NP_079199.2
dd_Smed_v6_5026_0	0.274044	0.418144	1.52583	1.89526	1	LOC101854365	Aplysia californica	WW domain-binding protein 11-like	XP_005108652.1
dd_Smed_v6_773_0	0.300455	0.430386	1.43245	1.89333	1	CCT4	Homo sapiens	chaperonin containing TCP1 subunit 4	NP_006421.2
dd_Smed_v6_1729_0	0.320695	0.464073	1.44709	1.88937	1	Ndufa7	Mus musculus	NADH dehydrogenase (ubiquinone) 1 alpha subcomplex, 7 (B14.5a)	NP_075691.1
dd_Smed_v6_8586_0	0.640464	0.903171	1.41018	1.88833	1	Mical2	Mus musculus	microtubule associated monooxygenase, calponin and LIM domain containing 2	NP_796256.1
dd_Smed_v6_1083_0	0.552591	0.895941	1.62135	1.88597	1
dd_Smed_v6_1078_1	0.195736	0.307196	1.56944	1.88489	1	CG10320	Drosophila melanogaster	CG10320 gene product from transcript CG10320-RE	NP_611596.1
dd_Smed_v6_3872_0	0.162059	0.29426	1.81576	1.88416	1	DNAJC8	Homo sapiens	DnaJ heat shock protein family (Hsp40) member C8	NP_055095.2
dd_Smed_v6_3351_0	0.837916	1.12037	1.33709	1.88011	1	PTPN23	Homo sapiens	protein tyrosine phosphatase, non-receptor type 23	NP_056281.1
dd_Smed_v6_1838_0	1.3902	1.78892	1.28681	1.87862	1	LOC100892829	Strongylocentrotus purpuratus	uncharacterized LOC100892829	XP_003731181.1
dd_Smed_v6_3735_0	0.166538	0.269503	1.61827	1.87748	1	SAP18	Homo sapiens	Sin3A associated protein 18kDa	NP_005861.2
dd_Smed_v6_11206_0	0.14253	0.237353	1.66528	1.87408	1	Slc1a2	Mus musculus	solute carrier family 1 (glial high affinity glutamate transporter), member 2	NP_035523.1
dd_Smed_v6_2488_0	0.573695	0.763885	1.33152	1.87304	1	EPRS	Homo sapiens	glutamyl-prolyl-tRNA synthetase	NP_004437.2
dd_Smed_v6_1930_0	0.25936	0.390493	1.5056	1.87049	1	ABCE1	Homo sapiens	ATP binding cassette subfamily E member 1	NP_002931.2
dd_Smed_v6_30641_0	0.16912	0.261341	1.5453	1.86908	1
dd_Smed_v6_2550_0	0.268037	0.394099	1.47031	1.86826	1	EIF3C	Homo sapiens	eukaryotic translation initiation factor 3 subunit C	NP_001273407.1
dd_Smed_v6_5978_0	0.154241	0.242564	1.57263	1.86815	1	NFAT5	Homo sapiens	nuclear factor of activated T-cells 5, tonicity-responsive	NP_001106649.1
dd_Smed_v6_887_0	0.279439	0.404272	1.44673	1.86729	1	SNRPB	Homo sapiens	small nuclear ribonucleoprotein polypeptides B and B1	NP_003082.1
dd_Smed_v6_804_0	2.23807	2.61038	1.16635	1.86714	1	EIF3A	Homo sapiens	eukaryotic translation initiation factor 3 subunit A	NP_003741.1
dd_Smed_v6_12826_0	0.239387	0.41394	1.72916	1.86402	1	LOC101234968	Hydra vulgaris	uncharacterized LOC101234968	XP_004209659.1
dd_Smed_v6_853_0	0.23269	0.351375	1.51006	1.86232	1	RPN1	Homo sapiens	ribophorin I	NP_002941.1
dd_Smed_v6_1305_0	0.179764	0.277842	1.54559	1.86227	1	KRTCAP2	Homo sapiens	keratinocyte associated protein 2	NP_776251.1
dd_Smed_v6_4303_0	0.213819	0.325215	1.52099	1.86204	1	ZNF207	Homo sapiens	zinc finger protein 207	NP_003448.1
dd_Smed_v6_7047_0	0.159262	0.261032	1.63901	1.85701	1	NCAPD2	Homo sapiens	non-SMC condensin I complex subunit D2	NP_055680.3
dd_Smed_v6_2220_0	0.264929	0.431689	1.62945	1.85546	1	LOC101465921	Maylandia zebra	probable 28S ribosomal protein S10, mitochondrial-like	XP_004568883.1
dd_Smed_v6_2458_0	0.468038	0.658332	1.40658	1.85452	1	RRS1	Homo sapiens	ribosome biogenesis regulator homolog	NP_055984.1
dd_Smed_v6_2942_0	0.580534	0.805629	1.38774	1.85421	1	LRWD1	Homo sapiens	leucine-rich repeats and WD repeat domain containing 1	XP_005250261.1
dd_Smed_v6_2649_0	0.274286	0.627374	2.28729	1.85173	1	FBN2	Homo sapiens	fibrillin 2	NP_001990.2
dd_Smed_v6_2721_0	0.311977	0.448305	1.43698	1.84634	1	UBE2Z	Homo sapiens	ubiquitin-conjugating enzyme E2Z	NP_075567.2
dd_Smed_v6_3328_0	0.313295	0.477471	1.52403	1.84587	1	TARDBP	Homo sapiens	TAR DNA binding protein	NP_031401.1
dd_Smed_v6_806_0	0.483123	0.64446	1.33395	1.84368	1	SEC11C	Homo sapiens	SEC11 homolog C, signal peptidase complex subunit	NP_150596.1
dd_Smed_v6_7709_0	0.684098	0.940169	1.37432	1.8435	1	NCOR1	Homo sapiens	nuclear receptor corepressor 1	XP_006721668.1
dd_Smed_v6_3406_0	0.182771	0.290725	1.59065	1.84334	1	bl	Drosophila melanogaster	bancal	NP_995907.1
dd_Smed_v6_1016_0	0.23594	0.379989	1.61053	1.83905	1	TMEM258	Homo sapiens	transmembrane protein 258	NP_055021.1
dd_Smed_v6_7712_0	0.225101	0.37178	1.65162	1.8389	1
dd_Smed_v6_8919_0	0.129362	0.230265	1.78	1.83858	1	LOC100643323	Bombus terrestris	chromatin assembly factor 1 subunit A	XP_003395990.1
dd_Smed_v6_1755_0	0.289983	0.417362	1.43927	1.8382	1	PRMT1	Homo sapiens	protein arginine methyltransferase 1	NP_001527.3
dd_Smed_v6_4818_0	0.217445	0.325911	1.49882	1.83565	1	Btk	Mus musculus	Bruton agammaglobulinemia tyrosine kinase	NP_038510.2
dd_Smed_v6_4163_0	0.323944	0.469681	1.44989	1.83349	1	CDC5L	Homo sapiens	cell division cycle 5 like	NP_001244.1
dd_Smed_v6_1304_0	0.493708	0.695717	1.40917	1.83215	1	LOC100639951	Amphimedon queenslandica	histidyl-tRNA synthetase, cytoplasmic-like	XP_003388151.1
dd_Smed_v6_1336_0	0.189907	0.293493	1.54545	1.83089	1	PRMT8	Homo sapiens	protein arginine methyltransferase 8	NP_001243465.1
dd_Smed_v6_2340_0	0.219194	0.336952	1.53723	1.829	1	ALG1	Homo sapiens	ALG1, chitobiosyldiphosphodolichol beta-mannosyltransferase	NP_061982.3
dd_Smed_v6_698_0	0.457863	0.626076	1.36739	1.82801	1	CDC42	Homo sapiens	cell division cycle 42	NP_426359.1
dd_Smed_v6_2325_0	0.478854	0.649117	1.35556	1.8262	1	SNW1	Homo sapiens	SNW domain containing 1	XP_005267471.1
dd_Smed_v6_2296_0	0.252326	0.370118	1.46682	1.82521	1	PFDN4	Homo sapiens	prefoldin subunit 4	NP_002614.2
dd_Smed_v6_7522_0	0.251959	0.381226	1.51305	1.8243	1	GFPT2	Homo sapiens	glutamine-fructose-6-phosphate transaminase 2	NP_005101.1
dd_Smed_v6_330_0	0.995884	1.23552	1.24062	1.82206	1	RAN	Homo sapiens	RAN, member RAS oncogene family	NP_006316.1
dd_Smed_v6_4895_0	0.350957	0.5104	1.45431	1.82144	1	CG8435	Drosophila melanogaster	CG8435 gene product from transcript CG8435-RA	NP_611092.2
dd_Smed_v6_3726_0	1.15047	1.42036	1.23459	1.82071	1	LOC100185441	Ciona intestinalis	serine/threonine-protein phosphatase 1 regulatory subunit 10	XP_002127216.1
dd_Smed_v6_537_0	0.153273	0.256536	1.67372	1.81921	1	LOC100263273	Vitis vinifera	pollen-specific protein SF3-like	XP_002279922.1
dd_Smed_v6_2424_0	0.309901	0.469156	1.51389	1.81906	1	AgaP	Anopheles gambiae str. PEST	AGAP008928-PA	XP_319681.2
dd_Smed_v6_5661_0	0.297266	0.461356	1.552	1.81862	1
dd_Smed_v6_4073_0	0.168374	0.264941	1.57353	1.81244	1	TRA2B	Homo sapiens	transformer 2 beta homolog (Drosophila)	NP_004584.1
dd_Smed_v6_3605_0	0.198093	0.301342	1.52121	1.81182	1	TIA1	Homo sapiens	TIA1 cytotoxic granule-associated RNA binding protein	XP_005264584.1
dd_Smed_v6_2546_0	0.234033	0.348325	1.48836	1.80929	1	PSMD12	Homo sapiens	proteasome 26S subunit, non-ATPase 12	NP_002807.1
dd_Smed_v6_8360_0	0.319855	0.468897	1.46597	1.8086	1	Tpr	Mus musculus	translocated promoter region, nuclear basket protein	XP_006529128.1
dd_Smed_v6_4136_0	0.286049	0.439535	1.53657	1.80599	1	RCC1	Homo sapiens	regulator of chromosome condensation 1	NP_001260.1
dd_Smed_v6_7122_0	0.152734	0.246526	1.61408	1.80592	1	TRIM33	Homo sapiens	tripartite motif containing 33	NP_056990.3
dd_Smed_v6_2797_0	0.496016	0.656509	1.32356	1.80381	1	SF3B1	Homo sapiens	splicing factor 3b subunit 1	NP_036565.2
dd_Smed_v6_1462_0	0.177555	0.276806	1.55899	1.80334	1	SGTB	Homo sapiens	small glutamine rich tetratricopeptide repeat containing beta	NP_061945.1
dd_Smed_v6_377_0	0.225004	0.347674	1.54519	1.80254	1	CACYBP	Homo sapiens	calcyclin binding protein	NP_055227.1
dd_Smed_v6_2008_0	0.358481	0.513706	1.43301	1.80166	1	LOC101924022	Falco peregrinus	testis-expressed sequence 2 protein-like	XP_005229188.1
dd_Smed_v6_776_0	0.280025	0.397786	1.42054	1.79859	1	CG4692	Drosophila melanogaster	CG4692 gene product from transcript CG4692-RB	NP_611940.1
dd_Smed_v6_10182_0	0.198364	0.408533	2.05952	1.78899	1	Pgap2	Mus musculus	post-GPI attachment to proteins 2	XP_006507709.1
dd_Smed_v6_6816_0	0.129201	0.285849	2.21244	1.78825	1	MYOF	Homo sapiens	myoferlin	NP_579899.1
dd_Smed_v6_16040_0	0.227598	0.368108	1.61736	1.78596	1	PGBD3	Homo sapiens	piggyBac transposable element derived 3	NP_736609.2
dd_Smed_v6_5932_0	0.15359	0.248988	1.62113	1.7847	1	LOC100121959	Nasonia vitripennis	transmembrane GTPase Marf	XP_008206382.1
dd_Smed_v6_1567_0	0.355029	0.489878	1.37982	1.78425	1	SPTLC1	Homo sapiens	serine palmitoyltransferase long chain base subunit 1	NP_006406.1
dd_Smed_v6_6006_0	0.234311	0.3668	1.56545	1.77604	1	CACNB1	Homo sapiens	calcium channel, voltage-dependent, beta 1 subunit	NP_954855.1
dd_Smed_v6_383_0	0.516774	0.681066	1.31792	1.77549	1	MYL12B	Homo sapiens	myosin light chain 12B	NP_291024.1
dd_Smed_v6_1118_0	0.179805	0.279725	1.55571	1.77343	1	KARS	Homo sapiens	lysyl-tRNA synthetase	NP_005539.1
dd_Smed_v6_1730_0	1.0951	1.33458	1.21868	1.77216	1	PRKCSH	Homo sapiens	protein kinase C substrate 80K-H	NP_001001329.1
dd_Smed_v6_5801_0	0.58797	0.816087	1.38797	1.77025	1	ARL16	Homo sapiens	ADP ribosylation factor like GTPase 16	NP_001035114.1
dd_Smed_v6_4278_0	0.173659	0.299285	1.72341	1.76672	1	SOAT1	Homo sapiens	sterol O-acyltransferase 1	NP_003092.4
dd_Smed_v6_8872_0	0.214867	0.360884	1.67957	1.76467	1	BRD7	Homo sapiens	bromodomain containing 7	NP_001167455.1
dd_Smed_v6_1906_0	0.158351	0.25271	1.59588	1.75919	1	DICSQDRAFT	Dichomitus squalens LYAD-421 SS1	MIF4G-domain-containing protein	XP_007362756.1
dd_Smed_v6_7987_0	0.335623	0.492527	1.4675	1.75843	1	AgaP	Anopheles gambiae str. PEST	AGAP008046-PA	XP_001689033.1
dd_Smed_v6_6301_0	0.241795	0.385883	1.59591	1.75109	1	PHF7	Homo sapiens	PHD finger protein 7	NP_057567.3
dd_Smed_v6_1757_0	0.267938	0.387971	1.44799	1.75012	1	dfnb59	Poecilia formosa	deafness, autosomal recessive 59	XP_007553767.1
dd_Smed_v6_2883_0	0.20977	0.311733	1.48607	1.74631	1	GNG12	Homo sapiens	G protein subunit gamma 12	NP_061329.3
dd_Smed_v6_4595_0	0.430888	0.62254	1.44478	1.74502	1	INO80	Homo sapiens	INO80 complex subunit	NP_060023.1
dd_Smed_v6_4873_0	0.246036	0.355949	1.44673	1.74415	1	HMGB1	Homo sapiens	high mobility group box 1	NP_002119.1
dd_Smed_v6_5959_0	0.324365	0.481127	1.48329	1.74308	1
dd_Smed_v6_4269_0	0.343586	0.528797	1.53905	1.74037	1	KDM1B	Homo sapiens	lysine demethylase 1B	XP_005248983.1
dd_Smed_v6_2907_0	0.363227	0.50356	1.38635	1.73923	1	MORC2	Homo sapiens	MORC family CW-type zinc finger 2	XP_005261448.1
dd_Smed_v6_3213_0	0.229258	0.358882	1.5654	1.73874	1
dd_Smed_v6_1948_0	0.536977	0.76947	1.43296	1.73641	1	HYPK	Homo sapiens	huntingtin interacting protein K	NP_057484.3
dd_Smed_v6_6311_0	0.215418	0.33236	1.54286	1.73351	1	GCC1	Homo sapiens	GRIP and coiled-coil domain containing 1	NP_078799.2
dd_Smed_v6_12353_0	0.361435	0.518205	1.43374	1.73329	1
dd_Smed_v6_462_0	0.328124	0.448991	1.36836	1.7328	1	LOC100114871	Nasonia vitripennis	prostaglandin E synthase 3	XP_003427934.1
dd_Smed_v6_8945_0	0.360016	0.61697	1.71373	1.73091	1	SLC25A30	Homo sapiens	solute carrier family 25, member 30	NP_001273735.1
dd_Smed_v6_1149_0	0.757898	0.953504	1.25809	1.7277	1	PSMD1	Homo sapiens	proteasome 26S subunit, non-ATPase 1	NP_002798.2
dd_Smed_v6_2286_0	0.110098	0.18484	1.67887	1.72676	1	RRM2	Homo sapiens	ribonucleotide reductase regulatory subunit M2	NP_001025.1
dd_Smed_v6_527_0	0.489297	0.656964	1.34267	1.72419	1	CCT6A	Homo sapiens	chaperonin containing TCP1 subunit 6A	NP_001753.1
dd_Smed_v6_2389_0	0.254544	0.371048	1.4577	1.72307	1	CNOT1	Homo sapiens	CCR4-NOT transcription complex, subunit 1	NP_001252541.1
dd_Smed_v6_3916_0	0.176064	0.27099	1.53916	1.72158	1	SMARCD1	Homo sapiens	SWI/SNF related, matrix associated, actin dependent regulator of chromatin, subfamily d, member 1	NP_003067.3
dd_Smed_v6_1509_0	0.269974	0.383745	1.42142	1.71272	1	SEPT11	Homo sapiens	septin 11	NP_060713.1
dd_Smed_v6_3900_1	0.281296	0.422231	1.50102	1.71269	1
dd_Smed_v6_1944_0	0.136155	0.221714	1.6284	1.70201	1	METTL6	Homo sapiens	methyltransferase like 6	NP_689609.2
dd_Smed_v6_8216_0	0.21065	0.314157	1.49137	1.70157	1
dd_Smed_v6_6100_0	0.331731	0.509254	1.53514	1.70095	1	PIGP	Homo sapiens	phosphatidylinositol glycan anchor biosynthesis, class P	NP_710149.1
dd_Smed_v6_3081_0	0.166013	0.259809	1.56499	1.69995	1	CSTF2	Homo sapiens	cleavage stimulation factor, 3' pre-RNA, subunit 2, 64kDa	NP_001316.1
dd_Smed_v6_4600_0	0.49891	0.657112	1.3171	1.69951	1	Smg1	Mus musculus	SMG1 homolog, phosphatidylinositol 3-kinase-related kinase (C. elegans)	XP_006507742.1
dd_Smed_v6_4127_0	0.190972	0.301116	1.57676	1.69883	1	BCL7A	Homo sapiens	B-cell CLL/lymphoma 7A	NP_066273.1
dd_Smed_v6_2039_0	0.191619	0.30472	1.59024	1.69835	1
dd_Smed_v6_3235_0	0.524017	0.688365	1.31363	1.69664	1	PAK1	Homo sapiens	p21 (RAC1) activated kinase 1	NP_002567.3
dd_Smed_v6_3249_0	0.137325	0.222199	1.61805	1.69646	1	PFDN5	Homo sapiens	prefoldin subunit 5	NP_002615.2
dd_Smed_v6_892_0	0.224203	0.333411	1.48709	1.69414	1	LOC100633141	Amphimedon queenslandica	zinc finger protein 593-like	XP_003389142.1
dd_Smed_v6_5680_0	0.172855	0.262924	1.52107	1.69377	1	CUL3	Homo sapiens	cullin 3	NP_003581.1
dd_Smed_v6_349_0	0.631351	0.807122	1.2784	1.69224	1	eif4a1a	Danio rerio	eukaryotic translation initiation factor 4A1A	NP_938180.1
dd_Smed_v6_3934_0	0.267256	0.383609	1.43536	1.68905	1	Cntn4	Mus musculus	contactin 4	NP_766592.2
dd_Smed_v6_10306_0	0.460889	0.629124	1.36502	1.68853	1	golga4	Callorhinchus milii	golgin A4	XP_007902283.1
dd_Smed_v6_5906_0	0.195647	0.32017	1.63647	1.6883	1	Gasu	Galdieria sulphuraria	ring finger protein	XP_005707551.1
dd_Smed_v6_4917_0	0.219028	0.328859	1.50145	1.68731	1	FERMT2	Homo sapiens	fermitin family member 2	NP_006823.1
dd_Smed_v6_782_0	0.251876	0.355736	1.41235	1.68521	1
dd_Smed_v6_6700_0	0.251568	0.368916	1.46647	1.68497	1
dd_Smed_v6_2002_0	0.299316	0.428824	1.43268	1.68483	1	CPOX	Homo sapiens	coproporphyrinogen oxidase	NP_000088.3
dd_Smed_v6_9345_0	0.340853	0.519399	1.52382	1.68441	1
dd_Smed_v6_5427_0	0.970113	1.21595	1.25341	1.68232	1	LUC7L3	Homo sapiens	LUC7 like 3 pre-mRNA splicing factor	XP_005257511.1
dd_Smed_v6_8759_0	0.538415	0.716699	1.33113	1.68225	1	NIPBL	Homo sapiens	Nipped-B homolog (Drosophila)	XP_005248340.1
dd_Smed_v6_789_0	0.244413	0.349459	1.42979	1.68141	1	COPB2	Homo sapiens	coatomer protein complex subunit beta 2	NP_004757.1
dd_Smed_v6_7271_0	0.127979	0.226431	1.76928	1.67991	1	Wbscr16	Mus musculus	Williams-Beuren syndrome chromosome region 16 homolog (human)	XP_006504601.1
dd_Smed_v6_4273_0	0.16472	0.253209	1.53721	1.67936	1	PLK1	Homo sapiens	polo like kinase 1	NP_005021.2
dd_Smed_v6_1868_0	0.221802	0.320528	1.44511	1.67868	1	PTBP1	Homo sapiens	polypyrimidine tract binding protein 1	NP_002810.1
dd_Smed_v6_4064_0	0.434575	0.590305	1.35835	1.67822	1
dd_Smed_v6_667_0	0.259304	0.35923	1.38536	1.67759	1	UBE2L3	Homo sapiens	ubiquitin conjugating enzyme E2 L3	NP_003338.1
dd_Smed_v6_572_0	0.502235	0.654809	1.30379	1.67609	1	SEPW1	Homo sapiens	selenoprotein W, 1	NP_003000.1
dd_Smed_v6_2807_0	0.206353	0.309636	1.50051	1.67583	1	gadd45gip1	Astyanax mexicanus	growth arrest and DNA-damage-inducible, gamma interacting protein 1	XP_007237609.1
dd_Smed_v6_418_0	0.203471	0.305645	1.50216	1.67451	1	SEC61B	Homo sapiens	Sec61 translocon beta subunit	NP_006799.1
dd_Smed_v6_7236_0	0.116151	0.228946	1.97111	1.66966	1	DPH7	Homo sapiens	diphthamide biosynthesis 7	NP_620133.1
dd_Smed_v6_2707_0	0.209029	0.316553	1.5144	1.66883	1	MYEF2	Homo sapiens	myelin expression factor 2	XP_005254484.1
dd_Smed_v6_4536_0	1.12096	1.45557	1.2985	1.6684	1	LUC7L	Homo sapiens	LUC7-like (S. cerevisiae)	NP_060502.1
dd_Smed_v6_1353_0	1.71667	2.01948	1.17639	1.66729	1	DNAJC2	Homo sapiens	DnaJ heat shock protein family (Hsp40) member C2	NP_055192.1
dd_Smed_v6_2689_0	0.173322	0.261228	1.50719	1.66689	1	NUDT18	Homo sapiens	nudix hydrolase 18	NP_079091.3
dd_Smed_v6_3018_0	0.150712	0.253446	1.68166	1.66689	1
dd_Smed_v6_9494_0	0.314689	0.498864	1.58526	1.66552	1	Traf3	Mus musculus	TNF receptor-associated factor 3	NP_035762.2
dd_Smed_v6_21461_0	0.134805	0.22063	1.63666	1.66026	1	Ost4	Mus musculus	oligosaccharyltransferase 4 homolog (S. cerevisiae)	NP_077780.3
dd_Smed_v6_1878_0	0.195704	0.301498	1.54058	1.66017	1	CG6463	Drosophila melanogaster	CG6463 gene product from transcript CG6463-RA	NP_648409.1
dd_Smed_v6_1465_1	0.22343	0.328932	1.47219	1.65784	1	TMED7	Homo sapiens	transmembrane emp24 protein transport domain containing 7	NP_861974.1
dd_Smed_v6_3197_0	0.216581	0.323673	1.49447	1.65731	1
dd_Smed_v6_2943_0	0.827673	1.02331	1.23637	1.65679	1	Casp3	Mus musculus	caspase 3	NP_033940.1
dd_Smed_v6_1405_0	0.12312	0.198685	1.61375	1.65564	1	PRPF31	Homo sapiens	pre-mRNA processing factor 31	NP_056444.3
dd_Smed_v6_4131_0	0.175198	0.280545	1.6013	1.6519	1	Tec	Mus musculus	tec protein tyrosine kinase	NP_001106931.1
dd_Smed_v6_1077_0	0.205263	0.301093	1.46687	1.65033	1	LOC100160516	Acyrthosiphon pisum	RNA-binding protein PNO1-like	NP_001155442.1
dd_Smed_v6_3293_0	0.796429	1.03991	1.30572	1.6487	1
dd_Smed_v6_511_0	2.18671	2.58627	1.18272	1.64636	1	HSPA5	Homo sapiens	heat shock protein family A (Hsp70) member 5	NP_005338.1
dd_Smed_v6_2462_0	0.22869	0.33461	1.46316	1.64536	1	LOC102802510	Saccoglossus kowalevskii	uncharacterized LOC102802510	XP_006818132.1
dd_Smed_v6_2376_0	0.25063	0.352582	1.40678	1.64297	1	SEP15	Homo sapiens	15 kDa selenoprotein	NP_004252.2
dd_Smed_v6_632_0	0.878442	1.07085	1.21903	1.64135	1	CANX	Homo sapiens	calnexin	NP_001737.1
dd_Smed_v6_6915_0	0.200466	0.341111	1.70159	1.63763	1	HSPG2	Homo sapiens	heparan sulfate proteoglycan 2	XP_006710657.1
dd_Smed_v6_2609_0	0.20389	0.306334	1.50245	1.63729	1
dd_Smed_v6_5418_0	0.403041	0.547373	1.35811	1.63303	1
dd_Smed_v6_5312_0	0.1184	0.209083	1.7659	1.63022	1	SSB	Homo sapiens	Sjogren syndrome antigen B	NP_003133.1
dd_Smed_v6_6378_0	0.24504	0.415227	1.69453	1.62925	1	C16orf58	Homo sapiens	chromosome 16 open reading frame 58	NP_073581.2
dd_Smed_v6_2142_0	0.150708	0.232903	1.54539	1.62768	1	GTF2F2	Homo sapiens	general transcription factor IIF subunit 2	NP_004119.1
dd_Smed_v6_12815_0	0.367941	0.503862	1.36941	1.62366	1	CHD6	Homo sapiens	chromodomain helicase DNA binding protein 6	XP_006723946.1
dd_Smed_v6_10941_0	1.94971	2.37587	1.21857	1.62344	1
dd_Smed_v6_4767_0	0.309902	0.437269	1.41099	1.62127	1	CNOT4	Homo sapiens	CCR4-NOT transcription complex subunit 4	NP_001008226.1
dd_Smed_v6_8462_0	0.408902	0.561786	1.37389	1.62029	1	PRKDC	Homo sapiens	protein kinase, DNA-activated, catalytic polypeptide	NP_008835.5
dd_Smed_v6_1217_0	0.154634	0.231317	1.49591	1.61782	1	MAGOHB	Homo sapiens	mago homolog B, exon junction complex core component	NP_060518.1
dd_Smed_v6_2967_0	0.162367	0.253545	1.56155	1.61609	1	TMEM115	Homo sapiens	transmembrane protein 115	NP_008955.1
dd_Smed_v6_4933_0	0.389417	0.536642	1.37807	1.61598	1	KDM5D	Homo sapiens	lysine (K)-specific demethylase 5D	XP_005262620.1
dd_Smed_v6_8647_0	0.187158	0.287071	1.53384	1.61531	1
dd_Smed_v6_6701_1	0.617982	0.843205	1.36445	1.60837	1	PDS5B	Homo sapiens	PDS5 cohesin associated factor B	NP_055847.1
dd_Smed_v6_3613_0	0.189869	0.288732	1.52069	1.60656	1	LOC658327	Tribolium castaneum	ATP-dependent 6-phosphofructokinase	XP_966779.1
dd_Smed_v6_3054_0	0.145546	0.239353	1.64452	1.60641	1	MBD3	Homo sapiens	methyl-CpG binding domain protein 3	NP_001268382.1
dd_Smed_v6_3781_0	0.226933	0.331492	1.46075	1.60581	1	TRA2B	Homo sapiens	transformer 2 beta homolog (Drosophila)	NP_001230808.1
dd_Smed_v6_988_0	0.334802	0.454417	1.35727	1.60254	1	NDUFA12	Homo sapiens	NADH:ubiquinone oxidoreductase subunit A12	NP_061326.1
dd_Smed_v6_1469_0	0.133471	0.209521	1.56979	1.59985	1	GSPT1	Homo sapiens	G1 to S phase transition 1	XP_005255332.1
dd_Smed_v6_5838_0	0.234425	0.348715	1.48754	1.59839	1
dd_Smed_v6_3796_0	0.166098	0.247781	1.49178	1.59319	1	CCBL2	Homo sapiens	cysteine conjugate-beta lyase 2	NP_001008662.1
dd_Smed_v6_530_0	0.791025	0.963852	1.21849	1.59183	1	TSTD1	Homo sapiens	thiosulfate sulfurtransferase like domain containing 1	NP_001106678.1
dd_Smed_v6_8009_0	0.173097	0.259673	1.50016	1.59172	1
dd_Smed_v6_407_0	0.503253	0.65136	1.2943	1.59101	1
dd_Smed_v6_5282_0	0.308778	0.4317	1.39809	1.59026	1
dd_Smed_v6_2190_0	0.14036	0.216257	1.54073	1.5882	1	TOMM70A	Homo sapiens	translocase of outer mitochondrial membrane 70 homolog A (S. cerevisiae)	NP_055635.3
dd_Smed_v6_12638_0	0.185707	0.277645	1.49507	1.58506	1	DNA2	Homo sapiens	DNA replication helicase/nuclease 2	NP_001073918.2
dd_Smed_v6_1818_0	0.226561	0.321228	1.41784	1.58454	1	dnm1l	Danio rerio	dynamin 1-like	NP_957216.1
dd_Smed_v6_585_0	0.249181	0.565356	2.26885	1.58451	1
dd_Smed_v6_1568_0	0.271869	0.382795	1.40801	1.58446	1	UNG	Homo sapiens	uracil DNA glycosylase	NP_550433.1
dd_Smed_v6_7294_0	0.283538	0.43078	1.5193	1.5816	1
dd_Smed_v6_10911_0	0.208361	0.328146	1.57489	1.58039	1	Zfp940	Mus musculus	zinc finger protein 940	NP_776099.1
dd_Smed_v6_10742_0	0.225269	0.323821	1.43748	1.57929	1	SETD2	Homo sapiens	SET domain containing 2	XP_005265151.1
dd_Smed_v6_11010_0	0.233167	0.346417	1.4857	1.57627	1	AgaP	Anopheles gambiae str. PEST	AGAP007681-PA	XP_308189.4
dd_Smed_v6_2809_0	0.369909	0.495224	1.33878	1.57569	1	METAP2	Homo sapiens	methionyl aminopeptidase 2	NP_006829.1
dd_Smed_v6_654_0	0.614986	0.764568	1.24323	1.57419	1	CHMP4A	Homo sapiens	charged multivesicular body protein 4A	NP_054888.2
dd_Smed_v6_5478_0	1.33315	1.592	1.19416	1.57367	1	LOC100378932	Saccoglossus kowalevskii	transcriptional regulator ATRX-like	XP_006823737.1
dd_Smed_v6_1254_0	0.219292	0.3147	1.43507	1.56908	1	CYC1	Homo sapiens	cytochrome c1	NP_001907.2
dd_Smed_v6_9411_0	0.174235	0.284609	1.63348	1.56739	1	9930021J03Rik	Mus musculus	RIKEN cDNA 9930021J03 gene	XP_006527138.1
dd_Smed_v6_713_0	0.180986	0.270879	1.49669	1.56328	1
dd_Smed_v6_1030_0	0.233069	0.336056	1.44188	1.55987	1	PFDN6	Homo sapiens	prefoldin subunit 6	NP_055075.1
dd_Smed_v6_1663_0	0.20245	0.28495	1.40751	1.55607	1
dd_Smed_v6_6655_0	0.235525	0.33635	1.42809	1.55229	1	COPS7B	Homo sapiens	COP9 signalosome subunit 7B	NP_001269879.1
dd_Smed_v6_5176_0	0.184084	0.267923	1.45544	1.55128	1	CpipJ	Culex quinquefasciatus	microtubule binding protein	XP_001850012.1
dd_Smed_v6_7768_0	0.349593	0.464594	1.32896	1.5507	1
dd_Smed_v6_7128_0	0.23005	0.347474	1.51043	1.54874	1	Stat5a	Mus musculus	signal transducer and activator of transcription 5A	NP_035618.1
dd_Smed_v6_838_0	0.168358	0.246217	1.46246	1.54446	1	REEP6	Homo sapiens	receptor accessory protein 6	NP_612402.1
dd_Smed_v6_801_0	0.0994674	0.373368	3.75367	1.5413	1	CALU	Homo sapiens	calumenin	NP_001186601.1
dd_Smed_v6_3445_0	0.311943	0.424508	1.36085	1.5391	1	ATIC	Homo sapiens	5-aminoimidazole-4-carboxamide ribonucleotide formyltransferase/IMP cyclohydrolase	NP_004035.2
dd_Smed_v6_9795_0	0.149835	0.245651	1.63948	1.53804	1	NTN1	Homo sapiens	netrin 1	NP_004813.2
dd_Smed_v6_2407_0	0.507126	0.685115	1.35098	1.53711	1	CG31195	Drosophila melanogaster	CG31195 gene product from transcript CG31195-RB	NP_732553.2
dd_Smed_v6_5045_0	0.183069	0.275911	1.50714	1.53457	1	CNOT6	Homo sapiens	CCR4-NOT transcription complex, subunit 6	NP_056270.2
dd_Smed_v6_12811_0	0.293252	0.43352	1.47832	1.53438	1	C1orf95	Homo sapiens	chromosome 1 open reading frame 95	NP_001003665.1
dd_Smed_v6_6442_1	0.218869	0.346751	1.58429	1.53356	1	f8a1	Xenopus tropicalis	coagulation factor VIII-associated 1	NP_001072171.1
dd_Smed_v6_6458_0	0.326741	0.446859	1.36763	1.53189	1	SPEN	Homo sapiens	spen family transcriptional repressor	NP_055816.2
dd_Smed_v6_4446_0	0.553775	0.756932	1.36686	1.52682	1	Dana	Drosophila ananassae	GF24861 gene product from transcript GF24861-RA	XP_001955900.1
dd_Smed_v6_1592_0	0.21008	0.298158	1.41926	1.52124	1	KDELR2	Homo sapiens	KDEL endoplasmic reticulum protein retention receptor 2	NP_006845.1
dd_Smed_v6_6847_0	0.242205	0.33703	1.39151	1.51729	1	RAD54L2	Homo sapiens	RAD54-like 2 (S. cerevisiae)	NP_055921.2
dd_Smed_v6_3992_0	0.525669	0.700055	1.33174	1.51585	1	ITSN1	Homo sapiens	intersectin 1 (SH3 domain protein)	NP_003015.2
dd_Smed_v6_1085_0	0.161141	0.240336	1.49147	1.51495	1	TMEM167A	Homo sapiens	transmembrane protein 167A	NP_777569.1
dd_Smed_v6_1751_0	0.181772	0.26631	1.46508	1.51398	1	KEAP1	Homo sapiens	kelch like ECH associated protein 1	NP_036421.2
dd_Smed_v6_6009_0	0.150781	0.228447	1.5151	1.5136	1	FAM136A	Homo sapiens	family with sequence similarity 136 member A	NP_116211.2
dd_Smed_v6_5178_0	0.529888	0.740253	1.397	1.51344	1	SFSWAP	Homo sapiens	splicing factor, suppressor of white-apricot family	XP_006719621.1
dd_Smed_v6_9831_0	0.278054	0.406882	1.46332	1.5121	1	FAM160A1	Homo sapiens	family with sequence similarity 160 member A1	NP_001103447.1
dd_Smed_v6_1923_0	0.179566	0.270043	1.50387	1.51185	1	SMAD4	Homo sapiens	SMAD family member 4	NP_005350.1
dd_Smed_v6_13548_0	0.194773	0.296697	1.5233	1.5073	1
dd_Smed_v6_5428_0	0.317195	0.438189	1.38145	1.5066	1	BAZ1B	Homo sapiens	bromodomain adjacent to zinc finger domain 1B	NP_115784.1
dd_Smed_v6_2887_0	0.263415	0.381915	1.44986	1.50612	1
dd_Smed_v6_1253_0	0.352536	0.462755	1.31265	1.5053	1	Sumo3	Mus musculus	SMT3 suppressor of mif two 3 homolog 3 (yeast)	XP_006513489.1
dd_Smed_v6_1961_0	0.432011	0.589923	1.36553	1.50293	1	ARCN1	Homo sapiens	archain 1	NP_001646.2
dd_Smed_v6_3967_0	0.628484	0.810861	1.29019	1.50217	1	CKAP5	Homo sapiens	cytoskeleton associated protein 5	NP_001008938.1
dd_Smed_v6_2833_0	0.135827	0.201204	1.48133	1.50145	1	TMED2	Homo sapiens	transmembrane emp24 domain trafficking protein 2	NP_006806.1
dd_Smed_v6_1867_0	0.202436	0.294601	1.45528	1.49955	1	ISCU	Homo sapiens	iron-sulfur cluster assembly enzyme	NP_998760.1
dd_Smed_v6_4555_0	0.188377	0.266394	1.41416	1.49802	1	AgaP	Anopheles gambiae str. PEST	AGAP005533-PA	XP_556172.2
dd_Smed_v6_2051_0	0.204007	0.295932	1.45059	1.49795	1	Ssr4	Mus musculus	signal sequence receptor, delta	NP_001159952.1
dd_Smed_v6_5194_0	0.122233	0.189006	1.54628	1.49738	1
dd_Smed_v6_741_0	0.138522	0.208382	1.50432	1.49728	1	SNRPE	Homo sapiens	small nuclear ribonucleoprotein polypeptide E	NP_003085.1
dd_Smed_v6_4231_0	0.229529	0.329675	1.43631	1.49553	1
dd_Smed_v6_309_0	1.18973	1.42049	1.19396	1.49489	1
dd_Smed_v6_5281_0	0.426142	0.554276	1.30069	1.49408	1	Lyar	Mus musculus	Ly1 antibody reactive clone	NP_079557.2
dd_Smed_v6_2532_0	0.215449	0.312378	1.44989	1.49351	1	SPAG1	Homo sapiens	sperm associated antigen 1	NP_003105.2
dd_Smed_v6_1168_0	0.842251	1.05589	1.25365	1.49338	1	MAEA	Homo sapiens	macrophage erythroblast attacher	NP_001017405.1
dd_Smed_v6_2956_0	0.131904	0.227088	1.72162	1.49238	1	SARS	Homo sapiens	seryl-tRNA synthetase	NP_006504.2
dd_Smed_v6_4747_0	0.123276	0.191626	1.55446	1.49215	1	EFTUD2	Homo sapiens	elongation factor Tu GTP binding domain containing 2	NP_004238.3
dd_Smed_v6_3458_0	0.205293	0.316579	1.54209	1.49154	1
dd_Smed_v6_7034_0	0.245413	0.34022	1.38632	1.4835	1	SIN3A	Homo sapiens	SIN3 transcription regulator family member A	NP_056292.1
dd_Smed_v6_682_0	0.360947	0.473185	1.31096	1.483	1	SYP	Homo sapiens	synaptophysin	NP_003170.1
dd_Smed_v6_900_0	0.56136	0.7216	1.28545	1.47866	1	Pes1	Mus musculus	pescadillo ribosomal biogenesis factor 1	NP_075027.1
dd_Smed_v6_2948_0	0.314204	0.433283	1.37899	1.47679	1	Ak1	Mus musculus	adenylate kinase 1	NP_001185719.1
dd_Smed_v6_1494_0	0.427452	0.559286	1.30842	1.47534	1	ATP6V1E1	Homo sapiens	ATPase H transporting V1 subunit E1	NP_001687.1
dd_Smed_v6_3485_0	0.237325	0.349197	1.47139	1.47449	1	RAB8A	Homo sapiens	RAB8A, member RAS oncogene family	NP_005361.2
dd_Smed_v6_3702_0	0.247732	0.360291	1.45436	1.47352	1	LCMT2	Homo sapiens	leucine carboxyl methyltransferase 2	NP_055608.2
dd_Smed_v6_4466_0	0.209435	0.297194	1.41903	1.47347	1	TMEM50B	Homo sapiens	transmembrane protein 50B	NP_006125.2
dd_Smed_v6_6188_0	1.94207	2.27349	1.17065	1.47224	1	dia	Apis mellifera	diaphanous	XP_395654.4
dd_Smed_v6_1559_0	0.199326	0.285555	1.4326	1.47135	1	IscW	Ixodes scapularis	B-cell receptor-associated protein, putative	XP_002403043.1
dd_Smed_v6_2034_0	0.251259	0.346925	1.38075	1.46493	1	EIF5	Homo sapiens	eukaryotic translation initiation factor 5	NP_001960.2
dd_Smed_v6_2657_0	0.207764	0.312321	1.50325	1.46306	1
dd_Smed_v6_1343_0	0.255353	0.347484	1.3608	1.46231	1	NAA15	Homo sapiens	N(alpha)-acetyltransferase 15, NatA auxiliary subunit	NP_476516.1
dd_Smed_v6_5146_0	0.14178	0.212188	1.49661	1.46144	1	TMEM147	Homo sapiens	transmembrane protein 147	NP_116024.1
dd_Smed_v6_905_0	0.747933	0.91765	1.22692	1.45927	1	ATPsyn-b	Drosophila melanogaster	ATP synthase, subunit b	NP_524011.1
dd_Smed_v6_12499_0	0.146858	0.262547	1.78777	1.45882	1
dd_Smed_v6_1302_0	0.346475	0.476974	1.37664	1.45811	1	PRMT1	Homo sapiens	protein arginine methyltransferase 1	NP_001527.3
dd_Smed_v6_2313_0	0.196835	0.283178	1.43866	1.45771	1	NNT	Homo sapiens	nicotinamide nucleotide transhydrogenase	NP_892022.2
dd_Smed_v6_3971_0	0.186122	0.267877	1.43925	1.4541	1	LONP1	Homo sapiens	lon peptidase 1, mitochondrial	NP_004784.2
dd_Smed_v6_3717_0	0.197643	0.289011	1.46229	1.452	1
dd_Smed_v6_1797_0	0.229789	0.313338	1.36359	1.44911	1	MANF	Homo sapiens	mesencephalic astrocyte derived neurotrophic factor	NP_006001.4
dd_Smed_v6_8950_0	0.190131	0.301161	1.58397	1.44757	1	PTRH2	Homo sapiens	peptidyl-tRNA hydrolase 2	NP_057161.1
dd_Smed_v6_4442_0	0.14419	0.217072	1.50546	1.44702	1	MRPS6	Homo sapiens	mitochondrial ribosomal protein S6	NP_115865.1
dd_Smed_v6_1239_0	0.568094	0.706765	1.2441	1.44661	1	RAP1B	Homo sapiens	RAP1B, member of RAS oncogene family	NP_056461.1
dd_Smed_v6_2432_0	0.177692	0.257281	1.4479	1.44548	1	AaeL	Aedes aegypti	hypothetical protein	XP_001651368.1
dd_Smed_v6_550_0	0.435236	0.556298	1.27815	1.44428	1	TKT	Homo sapiens	transketolase	NP_001055.1
dd_Smed_v6_2875_0	0.448228	0.612668	1.36687	1.44305	1	CBFB	Homo sapiens	core-binding factor, beta subunit	NP_001746.1
dd_Smed_v6_1134_0	0.22301	0.308614	1.38386	1.44196	1	Gnl2	Mus musculus	guanine nucleotide binding protein-like 2 (nucleolar)	XP_006503092.1
dd_Smed_v6_7667_0	0.330992	0.439409	1.32755	1.43899	1
dd_Smed_v6_1154_0	0.211305	0.291726	1.38059	1.43831	1	Psma5	Mus musculus	proteasome (prosome, macropain) subunit, alpha type 5	NP_036097.1
dd_Smed_v6_1110_0	0.87661	1.07495	1.22625	1.43645	1	TRAF5	Homo sapiens	TNF receptor-associated factor 5	XP_006711587.1
dd_Smed_v6_18600_0	0.174126	0.248117	1.42493	1.43642	1	LOC101305938	Fragaria vesca subsp. vesca	enzymatic polyprotein-like	XP_004297856.1
dd_Smed_v6_616_0	0.721022	0.883415	1.22523	1.43539	1	SEPW1	Homo sapiens	selenoprotein W, 1	NP_003000.1
dd_Smed_v6_2961_0	0.210001	0.298951	1.42357	1.43073	1
dd_Smed_v6_2059_0	0.212337	0.301647	1.42061	1.43044	1
dd_Smed_v6_3448_0	1.21164	1.48064	1.22202	1.42932	1
dd_Smed_v6_2346_0	0.15947	0.235473	1.4766	1.42793	1
dd_Smed_v6_2558_1	0.66251	0.87074	1.3143	1.42632	1	CCNK	Homo sapiens	cyclin K	NP_001092872.1
dd_Smed_v6_2347_0	0.281385	0.380161	1.35103	1.426	1	UQCC1	Homo sapiens	ubiquinol-cytochrome c reductase complex assembly factor 1	NP_001171906.1
dd_Smed_v6_2474_0	0.296092	0.393817	1.33005	1.42451	1	GTF2B	Homo sapiens	general transcription factor IIB	NP_001505.1
dd_Smed_v6_2829_0	0.208631	0.30252	1.45002	1.4206	1	LOC424919	Gallus gallus	deoxyribodipyrimidine photo-lyase-like	XP_422729.1
dd_Smed_v6_1136_0	0.556355	0.698305	1.25514	1.41912	1	RBX1	Homo sapiens	ring-box 1	NP_055063.1
dd_Smed_v6_1758_0	0.181803	0.260762	1.43432	1.41901	1	L2HGDH	Homo sapiens	L-2-hydroxyglutarate dehydrogenase	NP_079160.1
dd_Smed_v6_992_0	0.332565	0.44444	1.3364	1.41575	1	SPCS1	Homo sapiens	signal peptidase complex subunit 1 homolog (S. cerevisiae)	NP_054760.3
dd_Smed_v6_8668_0	0.281117	0.453879	1.61456	1.41467	1	fdxr	Stegastes partitus	ferredoxin reductase	XP_008303196.1
dd_Smed_v6_8285_0	0.359179	0.471563	1.31289	1.4124	1
dd_Smed_v6_2592_0	0.412794	0.533405	1.29218	1.41237	1	CELF5	Columba livia	CUGBP, Elav-like family member 5	XP_005511670.1
dd_Smed_v6_7685_0	0.281289	0.382859	1.36109	1.41193	1	RBM25	Homo sapiens	RNA binding motif protein 25	NP_067062.1
dd_Smed_v6_5837_0	0.410931	0.547669	1.33275	1.40853	1	KDM6A	Homo sapiens	lysine demethylase 6A	NP_001278350.1
dd_Smed_v6_6820_1	0.402698	0.555965	1.3806	1.40546	1	SART3	Homo sapiens	squamous cell carcinoma antigen recognized by T-cells 3	NP_055521.1
dd_Smed_v6_6432_0	0.834186	1.05618	1.26612	1.40511	1	Dsec	Drosophila sechellia	GM22122 gene product from transcript GM22122-RA	XP_002040843.1
dd_Smed_v6_676_0	0.366288	0.474618	1.29575	1.40478	1	LOC100741763	Bombus impatiens	guanine nucleotide-binding protein-like 3 homolog	XP_003494127.1
dd_Smed_v6_2448_0	0.206324	0.286404	1.38813	1.40397	1
dd_Smed_v6_11179_0	0.165912	0.250514	1.50992	1.40349	1	Paxbp1	Mus musculus	PAX3 and PAX7 binding protein 1	NP_080386.3
dd_Smed_v6_5100_0	0.206761	0.298365	1.44304	1.40331	1	IscW	Ixodes scapularis	DNA repair protein xp-C / rad4, putative	XP_002433931.1
dd_Smed_v6_2588_0	0.202626	0.282165	1.39254	1.40249	1	BAK1	Homo sapiens	BCL2 antagonist/killer 1	NP_001179.1
dd_Smed_v6_10808_0	0.303131	0.406839	1.34212	1.40176	1	Ercc5	Mus musculus	excision repair cross-complementing rodent repair deficiency, complementation group 5	NP_035859.2
dd_Smed_v6_908_0	0.28999	0.386953	1.33436	1.4011	1	PPM1A	Homo sapiens	protein phosphatase, Mg2 /Mn2 dependent 1A	NP_066283.1
dd_Smed_v6_11349_0	0.676489	0.891559	1.31792	1.39852	1	CELF2	Homo sapiens	CUGBP, Elav-like family member 2	XP_006717434.1
dd_Smed_v6_6839_0	0.179501	0.25932	1.44467	1.39848	1
dd_Smed_v6_1256_0	0.215841	0.299555	1.38785	1.39819	1	NDUFA13	Homo sapiens	NADH dehydrogenase (ubiquinone) 1 alpha subcomplex, 13	NP_057049.5
dd_Smed_v6_2890_0	0.236351	0.320257	1.35501	1.39319	1	ZNF333	Homo sapiens	zinc finger protein 333	XP_005260155.1
dd_Smed_v6_3666_0	0.272196	0.362499	1.33176	1.39306	1	ILK	Homo sapiens	integrin linked kinase	NP_004508.1
dd_Smed_v6_389_0	0.341033	0.443316	1.29992	1.38945	1	CD63	Homo sapiens	CD63 molecule	NP_001244321.1
dd_Smed_v6_12706_0	0.161569	0.262835	1.62676	1.38923	1	FGFR4	Eptesicus fuscus	fibroblast growth factor receptor 4	XP_008141159.1
dd_Smed_v6_7658_0	0.321029	0.432249	1.34645	1.38611	1	UBR5	Homo sapiens	ubiquitin protein ligase E3 component n-recognin 5	XP_005251019.1
dd_Smed_v6_2461_0	0.287782	0.388254	1.34913	1.3855	1	EMC3	Homo sapiens	ER membrane protein complex subunit 3	NP_060917.1
dd_Smed_v6_1231_0	0.192662	0.277891	1.44237	1.38419	1	PSMD4	Homo sapiens	proteasome 26S subunit, non-ATPase 4	NP_002801.1
dd_Smed_v6_335_0	0.363089	0.461139	1.27004	1.38233	1	CS	Homo sapiens	citrate synthase	NP_004068.2
dd_Smed_v6_5823_0	0.511666	0.66425	1.29821	1.3813	1	MYO7A	Homo sapiens	myosin VIIA	XP_005274069.1
dd_Smed_v6_8138_0	0.280604	0.39805	1.41855	1.38056	1	KCNMA1	Sus scrofa	potassium channel, calcium activated large conductance subfamily M alpha, member 1	NP_999384.1
dd_Smed_v6_5140_0	0.203686	0.289317	1.42041	1.37957	1	NUP50	Homo sapiens	nucleoporin 50kDa	NP_009103.2
dd_Smed_v6_5991_0	0.189915	0.27211	1.4328	1.37575	1	Appl	Apis mellifera	beta amyloid protein precursor-like	XP_006562952.1
dd_Smed_v6_4207_0	0.191397	0.27334	1.42813	1.37504	1	AgaP	Anopheles gambiae str. PEST	AGAP008503-PA	XP_316939.3
dd_Smed_v6_5257_0	0.152044	0.222054	1.46046	1.37359	1	TRA2B	Homo sapiens	transformer 2 beta homolog (Drosophila)	NP_001230808.1
dd_Smed_v6_5842_0	0.146931	0.21604	1.47035	1.3702	1	TDRD9	Homo sapiens	tudor domain containing 9	NP_694591.2
dd_Smed_v6_5124_0	0.437959	0.573802	1.31017	1.36105	1	MARK3	Homo sapiens	MAP/microtubule affinity-regulating kinase 3	NP_001122392.1
dd_Smed_v6_2309_0	0.404214	0.5322	1.31663	1.36045	1
dd_Smed_v6_9732_0	0.192375	0.294652	1.53165	1.35853	1	SLC40A1	Homo sapiens	solute carrier family 40 (iron-regulated transporter), member 1	NP_055400.1
dd_Smed_v6_3736_0	0.150826	0.21912	1.4528	1.35429	1	NUDCD1	Homo sapiens	NudC domain containing 1	NP_116258.2
dd_Smed_v6_5309_0	0.438817	0.570384	1.29982	1.35396	1	UPF3B	Homo sapiens	UPF3 regulator of nonsense transcripts homolog B (yeast)	XP_005262515.1
dd_Smed_v6_3366_0	0.186627	0.276273	1.48035	1.35385	1	WDR47	Homo sapiens	WD repeat domain 47	XP_006710524.1
dd_Smed_v6_3021_0	0.323375	0.419163	1.29621	1.35319	1	ACSL4	Homo sapiens	acyl-CoA synthetase long-chain family member 4	NP_004449.1
dd_Smed_v6_255_0	1.21184	1.4183	1.17037	1.34238	1	CALM2	Homo sapiens	calmodulin 2 (phosphorylase kinase, delta)	NP_001734.1
dd_Smed_v6_5000_0	0.147794	0.224084	1.5162	1.34121	1	EMC7	Homo sapiens	ER membrane protein complex subunit 7	NP_064539.1
dd_Smed_v6_9956_0	0.204969	0.284149	1.3863	1.33954	1
dd_Smed_v6_2071_0	0.32763	0.437612	1.33569	1.33945	1	GTF3C5	Homo sapiens	general transcription factor IIIC, polypeptide 5, 63kDa	XP_005272291.1
dd_Smed_v6_1151_0	0.38356	0.498468	1.29958	1.33853	1	COCSUDRAFT	Coccomyxa subellipsoidea C-169	hypothetical protein	XP_005648690.1
dd_Smed_v6_6163_0	0.202468	0.295031	1.45718	1.33729	1	DCP1A	Homo sapiens	decapping mRNA 1A	NP_001277133.1
dd_Smed_v6_6297_0	0.354774	0.473744	1.33534	1.33339	1	Rnf41	Mus musculus	ring finger protein 41	NP_080535.2
dd_Smed_v6_5613_0	0.187047	0.264766	1.41551	1.33317	1
dd_Smed_v6_710_0	0.201432	0.284767	1.41371	1.33227	1	Atp5e	Nasonia vitripennis	ATP synthase, H transporting, mitochondrial F1 complex, epsilon subunit	NP_001161441.1
dd_Smed_v6_1985_0	1.29626	1.55363	1.19854	1.33153	1	DDX4	Homo sapiens	DEAD-box helicase 4	NP_001160006.1
dd_Smed_v6_3526_0	0.160543	0.229105	1.42706	1.32587	1	KRR1	Homo sapiens	KRR1, small subunit processome component homolog	NP_008974.5
dd_Smed_v6_4891_0	0.302371	0.395084	1.30662	1.32567	1	NDUFAF3	Homo sapiens	NADH:ubiquinone oxidoreductase complex assembly factor 3	NP_951032.1
dd_Smed_v6_8499_0	0.347289	0.47803	1.37646	1.32142	1	UBAC1	Homo sapiens	UBA domain containing 1	NP_057256.2
dd_Smed_v6_9126_0	0.13798	0.223008	1.61624	1.32109	1
dd_Smed_v6_943_0	0.854075	1.0157	1.18924	1.32006	1	LOC101835150	Mesocricetus auratus	ATP synthase subunit e, mitochondrial-like	XP_005069600.1
dd_Smed_v6_1605_0	0.271528	0.358495	1.32029	1.32	1	Immt	Mus musculus	inner membrane protein, mitochondrial	NP_001240617.1
dd_Smed_v6_641_0	0.226414	0.303194	1.33912	1.31958	1	ARF5	Homo sapiens	ADP ribosylation factor 5	NP_001653.1
dd_Smed_v6_1032_0	0.244939	0.322075	1.31492	1.31722	1	CREB3L1	Homo sapiens	cAMP responsive element binding protein 3-like 1	NP_443086.1
dd_Smed_v6_2499_0	0.395442	0.502354	1.27036	1.3158	1
dd_Smed_v6_10906_0	0.167158	0.276142	1.65198	1.3134	1
dd_Smed_v6_5747_0	0.239373	0.323322	1.35071	1.31185	1
dd_Smed_v6_5271_0	0.271951	0.358714	1.31904	1.3082	1	ZMPSTE24	Homo sapiens	zinc metallopeptidase STE24	NP_005848.2
dd_Smed_v6_9680_0	0.164873	0.227123	1.37756	1.30634	1
dd_Smed_v6_2165_0	0.312262	0.406795	1.30274	1.30466	1	CBR1	Homo sapiens	carbonyl reductase 1	NP_001748.1
dd_Smed_v6_9029_0	0.169081	0.259293	1.53354	1.30339	1	LOC100185351	Ciona intestinalis	UPF0454 protein C12orf49 homolog	XP_002130011.1
dd_Smed_v6_7997_1	3.98066	4.76687	1.19751	1.3033	1
dd_Smed_v6_4969_0	0.340335	0.47378	1.3921	1.30224	1	TXNRD2	Homo sapiens	thioredoxin reductase 2	NP_006431.2
dd_Smed_v6_6173_0	0.137166	0.199878	1.45719	1.30107	1
dd_Smed_v6_4676_0	0.176648	0.248266	1.40543	1.30013	1	CpipJ	Culex quinquefasciatus	virilizer	XP_001864668.1
dd_Smed_v6_11267_0	0.307922	0.416261	1.35184	1.29706	1
dd_Smed_v6_1660_0	0.741921	0.957752	1.29091	1.29697	1
dd_Smed_v6_718_0	0.194246	0.27738	1.42798	1.29611	1	TUBA1A	Homo sapiens	tubulin alpha 1a	NP_001257329.1
dd_Smed_v6_1790_0	0.550972	0.677292	1.22927	1.2941	1	TPM3	Homo sapiens	tropomyosin 3	NP_001036818.1
dd_Smed_v6_2302_0	0.227535	0.307313	1.35062	1.28938	1	EIF3B	Homo sapiens	eukaryotic translation initiation factor 3 subunit B	NP_003742.2
dd_Smed_v6_147_0	2.74097	3.01799	1.10107	1.28818	1	DNAJA4	Homo sapiens	DnaJ heat shock protein family (Hsp40) member A4	NP_061072.3
dd_Smed_v6_5157_0	0.163049	0.230268	1.41226	1.28743	1	TFIP11	Homo sapiens	tuftelin interacting protein 11	NP_036275.1
dd_Smed_v6_4871_0	0.424777	0.533315	1.25552	1.28215	1
dd_Smed_v6_6277_0	0.197706	0.267055	1.35077	1.28145	1	LOC102308738	Haplochromis burtoni	unconventional myosin-XVIIIa-like	XP_005937218.1
dd_Smed_v6_6219_0	0.355726	0.461079	1.29616	1.2813	1	Arid1b	Mus musculus	AT rich interactive domain 1B (SWI-like)	XP_006523287.1
dd_Smed_v6_1800_0	0.3692	0.485114	1.31396	1.28085	1	CTNNBL1	Homo sapiens	catenin beta like 1	NP_001268424.1
dd_Smed_v6_4897_0	0.22366	0.303566	1.35727	1.27968	1	RBBP5	Homo sapiens	retinoblastoma binding protein 5	NP_005048.2
dd_Smed_v6_2199_0	0.266927	0.351218	1.31578	1.27775	1	OLA1	Homo sapiens	Obg-like ATPase 1	NP_037473.3
dd_Smed_v6_3464_0	0.180815	0.267626	1.48011	1.27603	1	SEL1L	Homo sapiens	SEL1L ERAD E3 ligase adaptor subunit	NP_005056.3
dd_Smed_v6_5804_0	0.149757	0.21062	1.40642	1.27501	1	PHF10	Homo sapiens	PHD finger protein 10	NP_060758.2
dd_Smed_v6_4563_0	0.885181	1.1138	1.25828	1.27363	1	TRAPPC11	Homo sapiens	trafficking protein particle complex 11	NP_068761.4
dd_Smed_v6_7629_0	0.241663	0.340621	1.40949	1.2736	1	DYM	Homo sapiens	dymeclin	XP_006722549.1
dd_Smed_v6_1537_0	0.377295	0.475067	1.25914	1.27133	1	PDIA5	Homo sapiens	protein disulfide isomerase family A member 5	NP_006801.1
dd_Smed_v6_3789_0	0.182058	0.257419	1.41394	1.27101	1	ANKZF1	Homo sapiens	ankyrin repeat and zinc finger domain containing 1	NP_060559.2
dd_Smed_v6_2321_0	0.174287	0.242729	1.3927	1.26637	1	CFDP1	Homo sapiens	craniofacial development protein 1	NP_006315.1
dd_Smed_v6_3623_0	0.26048	0.346595	1.3306	1.26384	1	C12orf65	Homo sapiens	chromosome 12 open reading frame 65	NP_689482.1
dd_Smed_v6_449_0	0.629898	0.748863	1.18886	1.26196	1	IDH2	Homo sapiens	isocitrate dehydrogenase (NADP( )) 2, mitochondrial	NP_002159.2
dd_Smed_v6_1135_0	0.280944	0.361078	1.28523	1.26165	1	DLD	Homo sapiens	dihydrolipoamide dehydrogenase	NP_000099.2
dd_Smed_v6_1142_0	0.209113	0.307894	1.47238	1.25874	1	LOC100376791	Saccoglossus kowalevskii	synembryn-A-like	XP_002739687.1
dd_Smed_v6_2481_0	0.145101	0.201507	1.38873	1.25714	1	PSMD2	Homo sapiens	proteasome 26S subunit, non-ATPase 2	NP_002799.3
dd_Smed_v6_2817_0	0.308677	0.400693	1.2981	1.25592	1	TRAF3	Homo sapiens	TNF receptor associated factor 3	NP_001186356.1
dd_Smed_v6_280_0	0.767226	0.900567	1.1738	1.25456	1	ODC1	Homo sapiens	ornithine decarboxylase 1	NP_002530.1
dd_Smed_v6_911_1	0.283455	0.372511	1.31418	1.25427	1
dd_Smed_v6_10087_0	0.218692	0.293893	1.34387	1.25226	1	Adck5	Mus musculus	aarF domain containing kinase 5	NP_766548.2
dd_Smed_v6_525_0	0.374707	0.468741	1.25095	1.2516	1	CCT2	Homo sapiens	chaperonin containing TCP1 subunit 2	NP_006422.1
dd_Smed_v6_6665_0	0.454299	0.602625	1.32649	1.24874	1	PELO	Homo sapiens	pelota homolog (Drosophila)	NP_057030.3
dd_Smed_v6_3169_0	1.21595	1.4223	1.16971	1.24764	1
dd_Smed_v6_5145_0	0.175202	0.254275	1.45132	1.2464	1
dd_Smed_v6_2144_0	0.40071	0.502788	1.25474	1.24598	1	LOC100159145	Acyrthosiphon pisum	acyl carrier protein, mitochondrial-like	NP_001233049.1
dd_Smed_v6_2730_0	0.513531	0.621777	1.21079	1.24521	1	ESD	Homo sapiens	esterase D	NP_001975.1
dd_Smed_v6_3110_0	0.159486	0.226773	1.4219	1.24269	1	ERCC6	Homo sapiens	excision repair cross-complementation group 6	NP_000115.1
dd_Smed_v6_5079_0	0.224113	0.301884	1.34702	1.24197	1
dd_Smed_v6_2118_0	0.195937	0.261702	1.33564	1.23727	1	LOC101860699	Aplysia californica	filaggrin-like	XP_005110299.1
dd_Smed_v6_4257_0	0.366452	0.471946	1.28788	1.23368	1	CLPX	Homo sapiens	caseinolytic mitochondrial matrix peptidase chaperone subunit	NP_006651.2
dd_Smed_v6_7431_0	0.533223	0.688276	1.29078	1.23182	1	KDM1A	Homo sapiens	lysine (K)-specific demethylase 1A	NP_055828.2
dd_Smed_v6_516_0	0.8454	0.98418	1.16416	1.2311	1	LOC100867738	Apis florea	polyubiquitin	XP_003697063.1
dd_Smed_v6_5228_0	0.346617	0.459971	1.32703	1.22886	1	LOC100680147	Nasonia vitripennis	zinc finger protein 346-like	XP_003424088.1
dd_Smed_v6_4240_0	0.206078	0.280574	1.3615	1.22872	1	TSFM	Homo sapiens	Ts translation elongation factor, mitochondrial	NP_005717.3
dd_Smed_v6_729_0	0.33785	0.425312	1.25888	1.22232	1	UQCRC1	Homo sapiens	ubiquinol-cytochrome c reductase core protein I	NP_003356.2
dd_Smed_v6_6298_0	0.402476	0.511411	1.27066	1.22212	1	EXD2	Homo sapiens	exonuclease 3'-5' domain containing 2	NP_001180289.1
dd_Smed_v6_545_0	0.250364	0.327241	1.30706	1.21863	1	ATP6V1G2	Homo sapiens	ATPase H transporting V1 subunit G2	NP_569730.1
dd_Smed_v6_5044_0	0.179443	0.245129	1.36605	1.21305	1	cnot3	Callorhinchus milii	CCR4-NOT transcription complex, subunit 3	XP_007908009.1
dd_Smed_v6_890_0	0.756067	0.88589	1.17171	1.21196	1
dd_Smed_v6_3914_0	0.448252	0.553621	1.23507	1.20881	1	MRPS35	Homo sapiens	mitochondrial ribosomal protein S35	NP_068593.2
dd_Smed_v6_2280_0	0.156751	0.215312	1.37359	1.20162	1	ADSL	Homo sapiens	adenylosuccinate lyase	NP_000017.1
dd_Smed_v6_6409_0	0.146547	0.205851	1.40468	1.19986	1	CG14903	Drosophila melanogaster	CG14903 gene product from transcript CG14903-RA	NP_650561.1
dd_Smed_v6_2504_0	0.371882	0.458935	1.23409	1.19447	1	PRPF8	Homo sapiens	pre-mRNA processing factor 8	NP_006436.3
dd_Smed_v6_1812_0	0.184748	0.244994	1.3261	1.19423	1	LRRC47	Homo sapiens	leucine rich repeat containing 47	NP_065761.1
dd_Smed_v6_746_0	0.38673	0.480707	1.24301	1.19345	1	TMED10	Homo sapiens	transmembrane emp24-like trafficking protein 10 (yeast)	NP_006818.3
dd_Smed_v6_2857_0	0.277249	0.357265	1.28861	1.19142	1	SDAD1	Homo sapiens	SDA1 domain containing 1	XP_005263159.1
dd_Smed_v6_5791_0	0.205737	0.278438	1.35337	1.1879	1
dd_Smed_v6_7537_0	0.523683	0.687414	1.31265	1.18712	1	LOC100887859	Strongylocentrotus purpuratus	transmembrane protein 128	XP_003725152.1
dd_Smed_v6_6615_0	0.188505	0.271509	1.44033	1.18591	1
dd_Smed_v6_9569_0	0.161573	0.22016	1.3626	1.18553	1	VPS13B	Homo sapiens	vacuolar protein sorting 13 homolog B (yeast)	NP_056058.2
dd_Smed_v6_5120_0	0.192313	0.2623	1.36392	1.1834	1	ASF1B	Homo sapiens	anti-silencing function 1B histone chaperone	NP_060624.1
dd_Smed_v6_10337_0	0.311269	0.425556	1.36716	1.18189	1	TOMM70A	Homo sapiens	translocase of outer mitochondrial membrane 70 homolog A (S. cerevisiae)	NP_055635.3
dd_Smed_v6_1264_0	0.848495	0.998563	1.17686	1.18188	1	PSMB7	Homo sapiens	proteasome subunit beta 7	NP_002790.1
dd_Smed_v6_8262_0	0.327177	0.41365	1.2643	1.18136	1	MRC2	Homo sapiens	mannose receptor C type 2	NP_006030.2
dd_Smed_v6_4233_0	0.167383	0.229249	1.36961	1.18114	1	AARS	Homo sapiens	alanyl-tRNA synthetase	NP_001596.2
dd_Smed_v6_2941_0	0.290445	0.373482	1.28589	1.18063	1	Tm1	Drosophila melanogaster	Tropomyosin 1	NP_001262590.1
dd_Smed_v6_1472_0	0.327815	0.409885	1.25036	1.18045	1	Pdcl3	Mus musculus	phosducin-like 3	NP_081126.2
dd_Smed_v6_3936_0	0.369505	0.47049	1.2733	1.17801	1
dd_Smed_v6_7857_0	0.299136	0.406142	1.35772	1.17447	1
dd_Smed_v6_2496_0	0.137359	0.188261	1.37058	1.17369	1	LOC100179410	Ciona intestinalis	proteasomal ubiquitin receptor ADRM1-like	XP_002131360.1
dd_Smed_v6_7072_0	0.303707	0.417222	1.37377	1.17163	1	TBC1D13	Homo sapiens	TBC1 domain family, member 13	XP_006717210.1
dd_Smed_v6_8782_0	0.133539	0.20367	1.52517	1.16862	1	LOC100648358	Bombus terrestris	rap guanine nucleotide exchange factor 6-like	XP_003395215.1
dd_Smed_v6_2017_0	0.26499	0.346904	1.30912	1.16573	1	ITGB1	Homo sapiens	integrin subunit beta 1	NP_002202.2
dd_Smed_v6_2808_0	0.35016	0.438451	1.25215	1.16187	1	STRN	Homo sapiens	striatin, calmodulin binding protein	XP_005264576.1
dd_Smed_v6_3564_0	0.146441	0.203492	1.38959	1.16109	1	Tdrd1	Chinchilla lanigera	tudor domain containing 1	XP_005387872.1
dd_Smed_v6_1257_0	0.184341	0.24522	1.33026	1.15894	1	CD151	Homo sapiens	CD151 molecule (Raph blood group)	NP_004348.2
dd_Smed_v6_8256_0	0.263275	0.3546	1.34688	1.15834	1	RBM18	Homo sapiens	RNA binding motif protein 18	NP_149108.1
dd_Smed_v6_3955_0	0.804112	0.942338	1.1719	1.15803	1	RBM25	Homo sapiens	RNA binding motif protein 25	NP_067062.1
dd_Smed_v6_528_0	0.274912	0.352081	1.2807	1.15769	1	Ybx1	Mus musculus	Y box protein 1	XP_006502996.1
dd_Smed_v6_781_0	0.187003	0.244723	1.30866	1.15663	1	ARPC5L	Homo sapiens	actin related protein 2/3 complex subunit 5-like	NP_112240.1
dd_Smed_v6_5036_0	0.210761	0.278482	1.32132	1.15399	1	ZC3H12C	Homo sapiens	zinc finger CCCH-type containing 12C	XP_005271774.1
dd_Smed_v6_6701_0	0.279988	0.410509	1.46616	1.15399	1
dd_Smed_v6_2422_0	0.460436	0.560241	1.21676	1.15225	1	UBR4	Homo sapiens	ubiquitin protein ligase E3 component n-recognin 4	XP_006710572.1
dd_Smed_v6_6031_0	0.302634	0.399572	1.32031	1.15128	1
dd_Smed_v6_1681_0	0.151275	0.21374	1.41293	1.14903	1	CG17737	Drosophila melanogaster	CG17737 gene product from transcript CG17737-RA	NP_647792.1
dd_Smed_v6_6172_0	0.257173	0.330535	1.28527	1.14815	1
dd_Smed_v6_368_0	0.403318	0.487693	1.2092	1.14766	1	TXNDC9	Homo sapiens	thioredoxin domain containing 9	NP_005774.2
dd_Smed_v6_1035_1	0.315371	0.410787	1.30255	1.14732	1	CBL	Homo sapiens	Cbl proto-oncogene	NP_005179.2
dd_Smed_v6_3391_0	0.467944	0.578994	1.23731	1.14678	1	LOC101074785	Takifugu rubripes	nephrin-like	XP_003966131.1
dd_Smed_v6_3140_0	0.233555	0.313914	1.34407	1.1451	1	MLX	Homo sapiens	MLX, MAX dimerization protein	NP_937848.1
dd_Smed_v6_9463_0	0.191072	0.258534	1.35307	1.14421	1	ARID2	Homo sapiens	AT-rich interaction domain 2	NP_689854.2
dd_Smed_v6_2505_0	0.216743	0.286859	1.3235	1.13901	1	USP14	Homo sapiens	ubiquitin specific peptidase 14	NP_005142.1
dd_Smed_v6_8417_0	1.29222	1.54341	1.19439	1.13888	1
dd_Smed_v6_747_0	0.689775	0.823768	1.19426	1.13867	1
dd_Smed_v6_1288_0	0.185899	0.240788	1.29526	1.13844	1	CCNT2	Erinaceus europaeus	cyclin T2	XP_007532756.1
dd_Smed_v6_1307_0	0.150995	0.2084	1.38018	1.138	1	SDF2	Homo sapiens	stromal cell derived factor 2	NP_008854.2
dd_Smed_v6_3565_0	0.143314	0.216787	1.51267	1.13708	1	RUNX1	Homo sapiens	runt-related transcription factor 1	NP_001116079.1
dd_Smed_v6_5096_0	0.316595	0.406546	1.28412	1.13697	1
dd_Smed_v6_5829_0	0.167909	0.223793	1.33282	1.13563	1	ENPP4	Python bivittatus	ectonucleotide pyrophosphatase/phosphodiesterase 4 (putative)	XP_007440744.1
dd_Smed_v6_1652_0	0.154535	0.210169	1.36001	1.13312	1
dd_Smed_v6_2680_0	0.333479	0.417329	1.25144	1.13169	1	EIF3M	Homo sapiens	eukaryotic translation initiation factor 3, subunit M	NP_006351.2
dd_Smed_v6_9974_1	0.236237	0.315251	1.33447	1.13158	1	CBG05275	Caenorhabditis briggsae	Hypothetical protein CBG05275	XP_002645577.1
dd_Smed_v6_2996_0	0.155365	0.213827	1.37629	1.13049	1	IscW	Ixodes scapularis	RAB GDP/GTP exchange factor, putative	XP_002414825.1
dd_Smed_v6_3533_0	0.240328	0.310509	1.29202	1.13019	1	NUP205	Homo sapiens	nucleoporin 205kDa	NP_055950.1
dd_Smed_v6_3168_0	0.185279	0.242684	1.30983	1.1289	1	ERLIN2	Homo sapiens	ER lipid raft associated 2	NP_009106.1
dd_Smed_v6_6794_0	0.219516	0.299178	1.3629	1.12757	1	LSM1	Homo sapiens	LSM1 homolog, mRNA degradation associated	NP_055277.1
dd_Smed_v6_4348_0	0.155239	0.213499	1.3753	1.12702	1	LETM1	Homo sapiens	leucine zipper and EF-hand containing transmembrane protein 1	XP_006713947.1
dd_Smed_v6_4272_0	0.214307	0.275712	1.28653	1.12676	1	EDF1	Homo sapiens	endothelial differentiation-related factor 1	NP_003783.1
dd_Smed_v6_4886_0	0.217811	0.280937	1.28982	1.12621	1	PIGT	Homo sapiens	phosphatidylinositol glycan anchor biosynthesis, class T	NP_057021.2
dd_Smed_v6_56_0	13.3058	14.3762	1.08044	1.12472	1	HSP90AA1	Homo sapiens	heat shock protein 90kDa alpha (cytosolic), class A member 1	NP_001017963.2
dd_Smed_v6_2001_0	0.305976	0.383849	1.25451	1.12269	1	UBB	Homo sapiens	ubiquitin B	NP_061828.1
dd_Smed_v6_5677_0	0.165696	0.229501	1.38507	1.12242	1	SETD8	Homo sapiens	SET domain containing (lysine methyltransferase) 8	XP_006719457.1
dd_Smed_v6_9754_0	0.165171	0.225335	1.36425	1.12142	1
dd_Smed_v6_1671_0	0.893733	1.03085	1.15342	1.12023	1
dd_Smed_v6_872_0	0.123236	0.170373	1.38249	1.11695	1	TXN2	Homo sapiens	thioredoxin 2	NP_036605.2
dd_Smed_v6_3525_0	0.245028	0.335164	1.36786	1.11605	1
dd_Smed_v6_1125_0	0.721385	0.839123	1.16321	1.11472	1	LSM14A	Homo sapiens	LSM14A mRNA processing body assembly factor	NP_056393.2
dd_Smed_v6_1364_0	0.184717	0.244832	1.32544	1.11217	1	UBQLN1	Homo sapiens	ubiquilin 1	NP_038466.2
dd_Smed_v6_2085_0	0.275311	0.342076	1.24251	1.11052	1	TECR	Homo sapiens	trans-2,3-enoyl-CoA reductase	NP_612510.1
dd_Smed_v6_6197_0	0.250633	0.346021	1.38059	1.10692	1
dd_Smed_v6_10101_0	0.229756	0.300051	1.30596	1.10683	1
dd_Smed_v6_7240_0	0.376825	0.478799	1.27061	1.09878	1	AGAP1	Homo sapiens	ArfGAP with GTPase domain, ankyrin repeat and PH domain 1	XP_005246116.1
dd_Smed_v6_7669_0	0.199257	0.264343	1.32664	1.0951	1	COPS3	Homo sapiens	COP9 signalosome subunit 3	NP_003644.2
dd_Smed_v6_488_0	0.277157	0.349677	1.26165	1.09068	1	RAB1A	Homo sapiens	RAB1A, member RAS oncogene family	NP_004152.1
dd_Smed_v6_1712_0	0.179845	0.236542	1.31526	1.08971	1	SPCS3	Homo sapiens	signal peptidase complex subunit 3	NP_068747.1
dd_Smed_v6_1038_0	0.390986	0.475771	1.21685	1.08922	1	PHB	Homo sapiens	prohibitin	NP_002625.1
dd_Smed_v6_2715_0	0.204703	0.262525	1.28247	1.08834	1	USP5	Homo sapiens	ubiquitin specific peptidase 5	NP_003472.2
dd_Smed_v6_4235_0	0.634918	0.766174	1.20673	1.08466	1	BAP1	Homo sapiens	BRCA1 associated protein-1 (ubiquitin carboxy-terminal hydrolase)	NP_004647.1
dd_Smed_v6_1879_0	0.29413	0.368789	1.25383	1.08313	1	GFM1	Homo sapiens	G elongation factor, mitochondrial 1	NP_079272.4
dd_Smed_v6_980_0	0.208644	0.269531	1.29183	1.08243	1	EIF2S3	Homo sapiens	eukaryotic translation initiation factor 2 subunit gamma	NP_001406.1
dd_Smed_v6_4203_0	0.169247	0.228134	1.34794	1.07904	1	DDRGK1	Homo sapiens	DDRGK domain containing 1	NP_076424.1
dd_Smed_v6_9444_0	0.147361	0.200086	1.3578	1.07726	1	HMG20A	Homo sapiens	high mobility group 20A	NP_060670.1
dd_Smed_v6_6781_0	0.138712	0.190926	1.37643	1.07578	1	LUC7L3	Homo sapiens	LUC7 like 3 pre-mRNA splicing factor	NP_057508.2
dd_Smed_v6_7344_0	0.40785	0.515716	1.26447	1.07575	1	SPTBN1	Homo sapiens	spectrin beta, non-erythrocytic 1	NP_003119.2
dd_Smed_v6_7444_0	0.3041	0.388397	1.2772	1.07553	1	TOB2	Homo sapiens	transducer of ERBB2, 2	NP_057356.1
dd_Smed_v6_4005_0	0.164605	0.221278	1.3443	1.07263	1	TOMM40	Homo sapiens	translocase of outer mitochondrial membrane 40	NP_006105.1
dd_Smed_v6_6651_0	0.343819	0.431991	1.25645	1.07123	1	CLIP1	Homo sapiens	CAP-Gly domain containing linker protein 1	NP_002947.1
dd_Smed_v6_1425_0	0.70457	0.817902	1.16085	1.07107	1	ADD1	Homo sapiens	adducin 1	NP_001110.2
dd_Smed_v6_4930_0	0.189855	0.255009	1.34318	1.0707	1	LOC103342112	Prunus mume	polyubiquitin-like	XP_008243902.1
dd_Smed_v6_6590_0	0.287867	0.363588	1.26304	1.0704	1	Asap	Drosophila melanogaster	ArfGAP with SH3 domain, ankyrin repeat and PH domain	NP_001163085.1
dd_Smed_v6_1150_0	0.188726	0.25046	1.32711	1.07011	1	MINOS1	Homo sapiens	mitochondrial inner membrane organizing system 1	NP_001027535.1
dd_Smed_v6_2324_0	0.26705	0.342419	1.28223	1.06819	1	Hyou1	Mus musculus	hypoxia up-regulated 1	XP_006510025.1
dd_Smed_v6_15344_0	0.317262	0.401982	1.26703	1.06727	1
dd_Smed_v6_3094_0	0.155097	0.206041	1.32847	1.06715	1	FRG1	Homo sapiens	FSHD region gene 1	NP_004468.1
dd_Smed_v6_15885_0	0.300763	0.402941	1.33973	1.06276	1
dd_Smed_v6_6196_0	0.162172	0.215985	1.33183	1.05802	1
dd_Smed_v6_730_0	0.536692	0.635665	1.18441	1.05789	1	ARHGDIA	Homo sapiens	Rho GDP dissociation inhibitor alpha	NP_004300.1
dd_Smed_v6_1325_0	0.256391	0.328709	1.28206	1.05637	1
dd_Smed_v6_9379_0	0.208979	0.288901	1.38244	1.05371	1	LOC100781764	Glycine max	mitogen-activated protein kinase kinase kinase YODA-like	XP_006581230.1
dd_Smed_v6_91_0	0.179588	0.243947	1.35837	1.0534	1	9530053A07Rik	Mus musculus	RIKEN cDNA 9530053A07 gene	NP_001158127.1
dd_Smed_v6_6383_0	0.38539	0.465982	1.20912	1.05139	1	EIF4G2	Homo sapiens	eukaryotic translation initiation factor 4 gamma 2	NP_001036024.3
dd_Smed_v6_4630_0	0.208779	0.278511	1.334	1.04552	1	4933427G17Rik	Mus musculus	RIKEN cDNA 4933427G17 gene	XP_006508317.1
dd_Smed_v6_1046_0	0.238438	0.303335	1.27218	1.04485	1
dd_Smed_v6_1220_0	0.2764	0.344998	1.24819	1.04274	1	EIF3H	Homo sapiens	eukaryotic translation initiation factor 3 subunit H	NP_003747.1
dd_Smed_v6_453_0	0.285115	0.352887	1.2377	1.03971	1	ACTR3	Homo sapiens	ARP3 actin-related protein 3 homolog (yeast)	NP_005712.1
dd_Smed_v6_1541_0	0.210999	0.267091	1.26584	1.03802	1	PSMA4	Homo sapiens	proteasome subunit alpha 4	NP_002780.1
dd_Smed_v6_598_0	0.42928	0.503916	1.17386	1.0371	1	CSDE1	Homo sapiens	cold shock domain containing E1, RNA-binding	NP_001007554.1
dd_Smed_v6_1034_0	0.256463	0.324583	1.26561	1.03485	1	DDX6	Homo sapiens	DEAD-box helicase 6	NP_004388.2
dd_Smed_v6_7289_0	0.492343	0.641164	1.30227	1.03458	1
dd_Smed_v6_1249_0	0.187541	0.237143	1.26449	1.02883	1	NPEPPS	Homo sapiens	aminopeptidase puromycin sensitive	NP_006301.3
dd_Smed_v6_4646_0	0.178948	0.247601	1.38365	1.02871	1	TXNDC11	Homo sapiens	thioredoxin domain containing 11	NP_056998.4
dd_Smed_v6_2363_0	0.273209	0.337811	1.23645	1.02792	1
dd_Smed_v6_6632_0	0.151308	0.213666	1.41213	1.02777	1	CRHR1	Homo sapiens	corticotropin releasing hormone receptor 1	NP_004373.2
dd_Smed_v6_522_0	0.192428	0.250184	1.30014	1.02767	1	RALA	Homo sapiens	RALA Ras like proto-oncogene A	NP_005393.2
dd_Smed_v6_277_0	0.197624	0.259554	1.31337	1.02675	1	Uqcrh	Mus musculus	ubiquinol-cytochrome c reductase hinge protein	NP_079917.1
dd_Smed_v6_1445_0	0.43079	0.522296	1.21241	1.02659	1	TRAP1	Homo sapiens	TNF receptor associated protein 1	NP_057376.2
dd_Smed_v6_1682_0	0.129189	0.171329	1.32619	1.02291	1	HSD17B10	Homo sapiens	hydroxysteroid (17-beta) dehydrogenase 10	NP_004484.1
dd_Smed_v6_8353_0	0.263303	0.358279	1.36071	1.02267	1	UBL5	Homo sapiens	ubiquitin like 5	NP_077268.1
dd_Smed_v6_1290_0	0.413332	0.495575	1.19898	1.02027	1	PRDX5	Homo sapiens	peroxiredoxin 5	NP_036226.1
dd_Smed_v6_4241_0	0.206683	0.259777	1.25688	1.01794	1	SF3B3	Homo sapiens	splicing factor 3b subunit 3	NP_036558.3
dd_Smed_v6_3239_0	0.139095	0.179218	1.28846	1.01712	1	GAR1	Homo sapiens	GAR1 ribonucleoprotein	NP_061856.1
dd_Smed_v6_5013_0	0.159866	0.210227	1.31502	1.0161	1
dd_Smed_v6_7039_0	0.219305	0.299304	1.36478	1.01351	1	DENND5B	Homo sapiens	DENN/MADD domain containing 5B	XP_005253387.1
dd_Smed_v6_6104_0	0.572594	0.725177	1.26648	1.01213	1	MIB1	Homo sapiens	mindbomb E3 ubiquitin protein ligase 1	NP_065825.1
dd_Smed_v6_8988_0	0.148846	0.208664	1.40188	1.01196	1
dd_Smed_v6_509_0	0.259849	0.322903	1.24266	1.0113	1	LOC702058	Macaca mulatta	cytochrome c oxidase subunit 7C, mitochondrial-like	XP_001093714.2
dd_Smed_v6_424_0	2.68836	2.94217	1.09441	1.01113	1	HSPA9	Homo sapiens	heat shock 70kDa protein 9 (mortalin)	NP_004125.3
dd_Smed_v6_4580_0	0.131093	0.175613	1.33961	1.00862	1	AaeL	Aedes aegypti	mitochondrial ribosomal protein, S34, putative	XP_001654332.1
dd_Smed_v6_2322_0	0.710139	0.834605	1.17527	1.00549	1	IntS1	Drosophila melanogaster	Integrator 1	NP_611875.1
dd_Smed_v6_11811_0	0.159167	0.225306	1.41553	1.0052	1	Fbxo40	Mus musculus	F-box protein 40	XP_006521946.1
dd_Smed_v6_1503_0	0.30653	0.378258	1.234	1.00508	1
dd_Smed_v6_4298_0	0.173517	0.226354	1.30451	1.00424	1	MRPS25	Homo sapiens	mitochondrial ribosomal protein S25	NP_071942.1
dd_Smed_v6_2174_0	0.100944	0.138898	1.37599	0.998174	1	CC1G	Coprinopsis cinerea okayama7#130	MIPC synthase	XP_001837254.2
dd_Smed_v6_14117_0	0.521705	0.6867	1.31626	0.997551	1	PCDH1	Homo sapiens	protocadherin 1	NP_001265542.1
dd_Smed_v6_2303_0	0.251152	0.315198	1.25501	0.996835	1	PRDX3	Homo sapiens	peroxiredoxin 3	NP_006784.1
dd_Smed_v6_7318_0	0.539257	0.64898	1.20347	0.988329	1	RECQL	Homo sapiens	RecQ like helicase	NP_116559.1
dd_Smed_v6_1963_0	0.324175	0.401348	1.23806	0.986128	1	SMARCB1	Homo sapiens	SWI/SNF related, matrix associated, actin dependent regulator of chromatin, subfamily b, member 1	NP_001007469.1
dd_Smed_v6_5874_0	0.212734	0.264355	1.24266	0.984571	1	COQ5	Homo sapiens	coenzyme Q5, methyltransferase	NP_115690.3
dd_Smed_v6_1539_0	0.202617	0.264284	1.30435	0.982326	1	MRPS16	Homo sapiens	mitochondrial ribosomal protein S16	NP_057149.1
dd_Smed_v6_20805_0	0.150528	0.197526	1.31222	0.979736	1	IscW	Ixodes scapularis	hypothetical protein	XP_002416346.1
dd_Smed_v6_9408_0	0.242632	0.317373	1.30804	0.978575	1
dd_Smed_v6_4168_0	0.237486	0.310685	1.30823	0.976659	1	COPS6	Homo sapiens	COP9 signalosome subunit 6	NP_006824.2
dd_Smed_v6_691_0	0.254998	0.316903	1.24277	0.975547	1	Romo1	Mus musculus	reactive oxygen species modulator 1	NP_080222.1
dd_Smed_v6_3651_0	0.260004	0.317929	1.22279	0.975448	1	RAB39B	Homo sapiens	RAB39B, member RAS oncogene family	NP_741995.1
dd_Smed_v6_5109_0	0.195027	0.256676	1.3161	0.974661	1	IVNS1ABP	Homo sapiens	influenza virus NS1A binding protein	NP_006460.2
dd_Smed_v6_3280_0	0.194341	0.248648	1.27944	0.97031	1	BRAFLDRAFT	Branchiostoma floridae	hypothetical protein	XP_002585530.1
dd_Smed_v6_2939_0	0.16091	0.209998	1.30506	0.968619	1	Ogt	Mus musculus	O-linked N-acetylglucosamine (GlcNAc) transferase (UDP-N-acetylglucosamine:polypeptide-N-acetylglucosaminyl transferase)	NP_631883.2
dd_Smed_v6_6185_0	0.209988	0.280913	1.33775	0.964724	1	DIP2A	Homo sapiens	DIP2 disco-interacting protein 2 homolog A (Drosophila)	NP_055966.2
dd_Smed_v6_9582_0	0.19356	0.26066	1.34666	0.96316	1
dd_Smed_v6_1208_0	0.363985	0.434698	1.19428	0.962543	1	COPB1	Homo sapiens	coatomer protein complex subunit beta 1	NP_057535.1
dd_Smed_v6_609_0	0.161672	2.66005	16.4534	0.961402	1	MRC1	Homo sapiens	mannose receptor, C type 1	NP_002429.1
dd_Smed_v6_1437_0	0.28454	0.347095	1.21985	0.959439	1	BRF1	Homo sapiens	BRF1, RNA polymerase III transcription initiation factor 90 kDa subunit	XP_005267618.1
dd_Smed_v6_3744_0	0.333358	0.403274	1.20973	0.958432	1
dd_Smed_v6_3776_0	0.245892	0.302439	1.22997	0.955292	1	ZMYM2	Homo sapiens	zinc finger, MYM-type 2	NP_003444.1
dd_Smed_v6_5501_0	0.155314	0.200067	1.28815	0.954723	1	LOC103486451	Cucumis melo	serine/threonine-protein kinase HT1-like	XP_008442647.1
dd_Smed_v6_515_0	0.014187	0.128615	9.06569	0.953742	1
dd_Smed_v6_4491_0	0.173818	0.242397	1.39454	0.952604	1	C14orf166	Homo sapiens	chromosome 14 open reading frame 166	NP_057123.1
dd_Smed_v6_2062_0	0.176685	0.226494	1.28191	0.950777	1	A1O7	Cladophialophora yegresii CBS 114405	carboxymethylenebutenolidase	XP_007761302.1
dd_Smed_v6_3709_0	0.176792	0.22845	1.29219	0.949567	1	CCDC124	Homo sapiens	coiled-coil domain containing 124	NP_612451.1
dd_Smed_v6_7155_0	0.172468	0.219543	1.27295	0.948134	1	fbxo38	Callorhinchus milii	F-box protein 38	XP_007904416.1
dd_Smed_v6_5098_0	0.27303	0.337591	1.23646	0.946761	1	IscW	Ixodes scapularis	hypothetical protein	XP_002407163.1
dd_Smed_v6_4263_0	0.16508	0.212165	1.28523	0.946619	1	LIN54	Homo sapiens	lin-54 DREAM MuvB core complex component	NP_001108479.1
dd_Smed_v6_6452_0	0.139708	0.181248	1.29734	0.946372	1	U2AF1	Homo sapiens	U2 small nuclear RNA auxiliary factor 1	NP_001020374.1
dd_Smed_v6_13399_0	0.476614	0.576121	1.20878	0.945377	1	GRIA1	Homo sapiens	glutamate ionotropic receptor AMPA type subunit 1	NP_001244949.1
dd_Smed_v6_13997_0	0.199775	0.251606	1.25945	0.944825	1
dd_Smed_v6_9064_0	0.280839	0.362595	1.29111	0.943447	1	TRMT1L	Homo sapiens	tRNA methyltransferase 1 homolog (S. cerevisiae)-like	NP_001189352.1
dd_Smed_v6_1600_0	0.166455	0.210213	1.26288	0.943271	1	EIF3E	Homo sapiens	eukaryotic translation initiation factor 3 subunit E	NP_001559.1
dd_Smed_v6_1597_0	0.383211	0.455364	1.18829	0.941958	1	CLUH	Homo sapiens	clustered mitochondria (cluA/CLU1) homolog	NP_056044.3
dd_Smed_v6_5713_0	0.32188	0.407239	1.26519	0.940938	1	SLC6A5	Homo sapiens	solute carrier family 6 (neurotransmitter transporter), member 5	NP_004202.2
dd_Smed_v6_1762_0	0.158094	0.202878	1.28328	0.940447	1	CHMP6	Homo sapiens	charged multivesicular body protein 6	NP_078867.2
dd_Smed_v6_1211_0	0.849144	0.96837	1.14041	0.940141	1	PNKP	Homo sapiens	polynucleotide kinase 3'-phosphatase	NP_009185.2
dd_Smed_v6_1006_0	0.256643	0.317417	1.23681	0.939985	1	Atp2a2	Mus musculus	ATPase, Ca transporting, cardiac muscle, slow twitch 2	NP_033852.1
dd_Smed_v6_2656_0	0.124566	0.165415	1.32793	0.93995	1	PHF5A	Homo sapiens	PHD finger protein 5A	NP_116147.1
dd_Smed_v6_3763_0	0.261065	0.33814	1.29523	0.939458	1	SLMAP	Homo sapiens	sarcolemma associated protein	XP_005265528.1
dd_Smed_v6_878_0	0.409275	0.483622	1.18165	0.938145	1	LOC101889659	Musca domestica	reticulon-4-like	XP_005189405.1
dd_Smed_v6_1717_0	0.18118	0.226532	1.25032	0.932644	1	SEPT4	Homo sapiens	septin 4	XP_006722013.1
dd_Smed_v6_1225_0	1.21227	1.3441	1.10874	0.932543	1	CSNK1A1	Homo sapiens	casein kinase 1 alpha 1	NP_001883.4
dd_Smed_v6_2834_0	0.144	0.187677	1.30332	0.930829	1	NDUFA6	Homo sapiens	NADH:ubiquinone oxidoreductase subunit A6	NP_002481.2
dd_Smed_v6_998_0	0.203404	0.252103	1.23942	0.928527	1	UBE2G1	Homo sapiens	ubiquitin conjugating enzyme E2 G1	NP_003333.1
dd_Smed_v6_2000_0	0.313875	0.376061	1.19812	0.92764	1
dd_Smed_v6_6376_0	0.213074	0.267108	1.25359	0.926285	1
dd_Smed_v6_6283_0	0.195985	0.245819	1.25427	0.924302	1	Kmt2a	Mus musculus	lysine (K)-specific methyltransferase 2A	NP_001074518.1
dd_Smed_v6_546_0	0.381565	0.453127	1.18755	0.923882	1	LOC100184001	Ciona intestinalis	tetraspanin-1-like	XP_002123087.1
dd_Smed_v6_4376_0	0.728511	0.871585	1.19639	0.923864	1	TEP1	Homo sapiens	telomerase associated protein 1	NP_009041.2
dd_Smed_v6_2754_0	0.18384	0.233739	1.27143	0.920572	1	SF3B1	Homo sapiens	splicing factor 3b subunit 1	NP_036565.2
dd_Smed_v6_14672_0	0.144567	0.190789	1.31973	0.919268	1
dd_Smed_v6_11674_0	0.167724	0.21192	1.2635	0.919008	1	RPS6KB1	Homo sapiens	ribosomal protein S6 kinase B1	NP_001258973.1
dd_Smed_v6_1716_0	0.548851	0.63866	1.16363	0.918986	1	LETM1	Homo sapiens	leucine zipper and EF-hand containing transmembrane protein 1	XP_006713947.1
dd_Smed_v6_7822_0	0.185129	0.242513	1.30997	0.918959	1	AQR	Homo sapiens	aquarius intron-binding spliceosomal factor	NP_055506.1
dd_Smed_v6_2752_0	0.188557	0.239897	1.27228	0.918136	1	VAPA	Homo sapiens	VAMP associated protein A	NP_919415.2
dd_Smed_v6_5924_0	0.360117	0.440026	1.2219	0.916444	1	MAPK10	Homo sapiens	mitogen-activated protein kinase 10	NP_620446.1
dd_Smed_v6_1417_0	0.319958	0.389672	1.21788	0.915021	1	CALU	Homo sapiens	calumenin	NP_001210.1
dd_Smed_v6_8078_0	0.284135	0.35737	1.25775	0.914516	1	EIF4G1	Gallus gallus	eukaryotic translation initiation factor 4 gamma, 1	XP_004943470.1
dd_Smed_v6_742_0	0.315354	0.376734	1.19464	0.914259	1	UQCRQ	Homo sapiens	ubiquinol-cytochrome c reductase complex III subunit VII	NP_055217.2
dd_Smed_v6_1438_0	0.364597	0.437112	1.19889	0.914246	1	AaeL	Aedes aegypti	AAEL014668-PA	XP_001649301.1
dd_Smed_v6_33732_0	0.346468	0.522415	1.50783	0.913964	1
dd_Smed_v6_798_0	0.317454	1.62953	5.1331	0.911532	1
dd_Smed_v6_4227_0	0.1799	0.233238	1.29649	0.910679	1	UBE2M	Homo sapiens	ubiquitin conjugating enzyme E2 M	NP_003960.1
dd_Smed_v6_11007_0	0.709911	0.892913	1.25778	0.907577	1	LOC100183438	Ciona intestinalis	general transcription factor 3C polypeptide 2-like	XP_002122492.2
dd_Smed_v6_484_0	0.46125	0.535834	1.1617	0.906498	1	eIF-5A	Drosophila melanogaster	CG3186 gene product from transcript CG3186-RB	NP_611878.1
dd_Smed_v6_1905_0	0.239766	0.291842	1.2172	0.90615	1	CpipJ	Culex quinquefasciatus	NADH dehydrogenase	XP_001846420.1
dd_Smed_v6_2931_0	0.206394	0.262966	1.27409	0.905045	1	GNA13	Homo sapiens	G protein subunit alpha 13	NP_006563.2
dd_Smed_v6_1081_0	0.305283	0.36616	1.19941	0.903851	1	CNOT7	Homo sapiens	CCR4-NOT transcription complex, subunit 7	NP_473367.2
dd_Smed_v6_2930_0	0.238461	0.296255	1.24236	0.903456	1	GTF2A2	Homo sapiens	general transcription factor IIA, 2, 12kDa	NP_004483.1
dd_Smed_v6_3787_0	0.365177	0.433365	1.18673	0.903178	1	mtl5	Poecilia formosa	metallothionein-like 5, testis-specific (tesmin)	XP_007541551.1
dd_Smed_v6_3495_0	0.235703	0.28804	1.22205	0.901097	1
dd_Smed_v6_2254_0	0.250534	0.30334	1.21078	0.900722	1	EIF3D	Homo sapiens	eukaryotic translation initiation factor 3 subunit D	NP_003744.1
dd_Smed_v6_12777_0	0.823577	0.995041	1.20819	0.894931	1
dd_Smed_v6_7981_0	0.371426	0.466089	1.25486	0.893611	1	AaeL	Aedes aegypti	AAEL003829-PA	XP_001657306.1
dd_Smed_v6_8529_0	0.296849	0.375927	1.26639	0.89325	1
dd_Smed_v6_3884_0	0.187024	0.244139	1.30539	0.890038	1	UTP14A	Homo sapiens	UTP14A small subunit processome component	XP_005262420.1
dd_Smed_v6_8341_0	0.137265	0.175836	1.28099	0.889884	1
dd_Smed_v6_12419_0	0.16757	0.215822	1.28795	0.889145	1	MDN1	Homo sapiens	MDN1, midasin homolog (yeast)	NP_055426.1
dd_Smed_v6_1733_0	1.68693	1.86315	1.10446	0.887354	1	C11orf54	Homo sapiens	chromosome 11 open reading frame 54	NP_001272999.1
dd_Smed_v6_799_0	0.336117	0.395955	1.17803	0.88734	1	DDX3X	Homo sapiens	DEAD (Asp-Glu-Ala-Asp) box helicase 3, X-linked	NP_001347.3
dd_Smed_v6_5269_0	0.187932	0.247258	1.31567	0.886832	1	Paxip1	Mus musculus	PAX interacting (with transcription-activation domain) protein 1	XP_006535821.1
dd_Smed_v6_6735_0	0.195156	0.255236	1.30786	0.886832	1	STX16	Homo sapiens	syntaxin 16	NP_003754.2
dd_Smed_v6_5682_0	0.305035	0.367633	1.20522	0.886062	1	LOC100533321	Aplysia californica	NMDA-type glutamate receptor	NP_001191411.1
dd_Smed_v6_2180_0	0.180084	0.228418	1.2684	0.885945	1	PRKAR1B	Homo sapiens	protein kinase cAMP-dependent type I regulatory subunit beta	NP_002726.1
dd_Smed_v6_10380_0	0.284818	0.356302	1.25098	0.885714	1	UNC5B	Homo sapiens	unc-5 homolog B (C. elegans)	NP_734465.2
dd_Smed_v6_567_0	0.176017	0.225472	1.28097	0.883926	1	CYB5A	Homo sapiens	cytochrome b5 type A	NP_683725.1
dd_Smed_v6_1607_0	0.183654	0.232982	1.26859	0.883372	1
dd_Smed_v6_2130_0	0.168981	0.237439	1.40513	0.882826	1
dd_Smed_v6_6143_0	0.180171	0.228226	1.26672	0.879959	1	DDX46	Homo sapiens	DEAD-box helicase 46	NP_055644.2
dd_Smed_v6_5608_0	0.211325	0.275014	1.30138	0.879748	1	ZBED8	Homo sapiens	zinc finger BED-type containing 8	NP_071373.2
dd_Smed_v6_1764_0	0.254249	0.32105	1.26274	0.875588	1	SEC24C	Homo sapiens	SEC24 homolog C, COPII coat complex component	NP_004913.2
dd_Smed_v6_11208_0	0.20182	0.272285	1.34915	0.873979	1
dd_Smed_v6_1031_0	0.338642	0.401681	1.18615	0.873695	1	DPP3	Homo sapiens	dipeptidyl peptidase 3	NP_005691.2
dd_Smed_v6_1675_0	0.34821	0.411078	1.18055	0.873622	1	Aimp1	Mus musculus	aminoacyl tRNA synthetase complex-interacting multifunctional protein 1	NP_031952.2
dd_Smed_v6_5205_0	0.167798	0.216053	1.28758	0.870464	1	DDX42	Homo sapiens	DEAD-box helicase 42	NP_031398.2
dd_Smed_v6_1278_0	0.147484	0.187542	1.27162	0.869219	1	PSMA1	Homo sapiens	proteasome subunit alpha 1	NP_002777.1
dd_Smed_v6_2691_0	0.223447	0.271395	1.21458	0.869169	1	NARS	Homo sapiens	asparaginyl-tRNA synthetase	NP_004530.1
dd_Smed_v6_2751_0	0.144885	0.185873	1.2829	0.867163	1	CSTF3	Homo sapiens	cleavage stimulation factor subunit 3	NP_001317.1
dd_Smed_v6_1815_0	0.127621	0.164116	1.28596	0.867052	1	NDUFA2	Homo sapiens	NADH:ubiquinone oxidoreductase subunit A2	NP_002479.1
dd_Smed_v6_10802_0	0.217827	0.267105	1.22622	0.86489	1	PDCD11	Homo sapiens	programmed cell death 11	NP_055791.1
dd_Smed_v6_11337_0	0.208274	0.264584	1.27037	0.861232	1
dd_Smed_v6_3463_0	0.280115	0.334844	1.19538	0.861078	1	XRN2	Homo sapiens	5'-3' exoribonuclease 2	NP_036387.2
dd_Smed_v6_7409_0	0.258991	0.312322	1.20592	0.860625	1	LOC101073438	Takifugu rubripes	nuclear receptor coactivator 4-like	XP_003963979.1
dd_Smed_v6_2214_0	0.141876	0.177231	1.2492	0.858872	1	COPG2	Homo sapiens	coatomer protein complex subunit gamma 2	NP_036265.3
dd_Smed_v6_1023_0	0.264684	0.32033	1.21024	0.858002	1	TMED4	Homo sapiens	transmembrane emp24 protein transport domain containing 4	NP_872353.2
dd_Smed_v6_5209_0	0.19836	0.25394	1.2802	0.85784	1	TSPAN11	Homo sapiens	tetraspanin 11	NP_001073978.1
dd_Smed_v6_2183_0	0.154758	0.193333	1.24926	0.85117	1	DUSP15	Homo sapiens	dual specificity phosphatase 15	NP_542178.2
dd_Smed_v6_4267_0	0.62398	0.752516	1.206	0.850858	1	GRIK3	Homo sapiens	glutamate ionotropic receptor kainate type subunit 3	NP_000822.2
dd_Smed_v6_8723_0	0.187077	0.231406	1.23695	0.848912	1	CLK2	Homo sapiens	CDC like kinase 2	XP_005244935.1
dd_Smed_v6_39713_0	0.162696	0.208621	1.28228	0.838469	1
dd_Smed_v6_552_0	0.129569	0.170391	1.31507	0.837477	1	CDK2AP2	Homo sapiens	cyclin-dependent kinase 2 associated protein 2	NP_001258778.1
dd_Smed_v6_3004_0	0.677144	0.769079	1.13577	0.836509	1	KIF5B	Homo sapiens	kinesin family member 5B	NP_004512.1
dd_Smed_v6_4283_0	0.187847	0.235289	1.25256	0.833059	1	MED19	Homo sapiens	mediator complex subunit 19	NP_703151.1
dd_Smed_v6_1591_0	0.458876	0.534921	1.16572	0.832951	1	EPS15L1	Homo sapiens	epidermal growth factor receptor pathway substrate 15 like 1	NP_001245304.1
dd_Smed_v6_1638_0	0.136375	0.174359	1.27852	0.832823	1	Mrpl24	Mus musculus	mitochondrial ribosomal protein L24	NP_080867.2
dd_Smed_v6_20985_0	0.202995	0.267722	1.31886	0.830688	1
dd_Smed_v6_2050_0	0.155483	0.193528	1.24469	0.830246	1	ALDH6A1	Homo sapiens	aldehyde dehydrogenase 6 family member A1	NP_005580.1
dd_Smed_v6_1918_0	0.323071	0.396778	1.22814	0.828282	1	SEPHS1	Homo sapiens	selenophosphate synthetase 1	NP_001182531.1
dd_Smed_v6_3315_0	0.202086	0.245734	1.21599	0.825406	1	NOMO2	Homo sapiens	NODAL modulator 2	NP_775885.1
dd_Smed_v6_13843_0	0.314658	0.379858	1.20721	0.824433	1	CUX1	Homo sapiens	cut-like homeobox 1	NP_853530.2
dd_Smed_v6_2795_0	0.27756	0.33883	1.22074	0.822559	1	PSENEN	Homo sapiens	presenilin enhancer gamma secretase subunit	NP_758844.1
dd_Smed_v6_6563_0	0.683972	0.785385	1.14827	0.822394	1	Dmoj	Drosophila mojavensis	GI11945 gene product from transcript GI11945-RA	XP_002012399.1
dd_Smed_v6_2025_0	0.339427	0.406093	1.19641	0.822277	1	TSPAN17	Homo sapiens	tetraspanin 17	NP_036303.1
dd_Smed_v6_3083_0	0.239292	0.290185	1.21268	0.821887	1
dd_Smed_v6_6154_0	0.71187	0.858594	1.20611	0.816893	1	PARP2	Homo sapiens	poly(ADP-ribose) polymerase 2	NP_001036083.1
dd_Smed_v6_982_0	0.406133	0.469089	1.15501	0.816421	1	SDHD	Homo sapiens	succinate dehydrogenase complex subunit D	NP_001263433.1
dd_Smed_v6_7807_0	0.35867	0.441096	1.22981	0.815188	1	PCDH11X	Homo sapiens	protocadherin 11 X-linked	NP_001161833.1
dd_Smed_v6_4289_0	0.37382	0.44808	1.19865	0.814682	1	Creld1	Mus musculus	cysteine-rich with EGF-like domains 1	NP_598691.1
dd_Smed_v6_4249_0	0.267208	0.319507	1.19572	0.812465	1	C4orf29	Homo sapiens	chromosome 4 open reading frame 29	XP_005263295.1
dd_Smed_v6_2341_0	0.377808	0.469887	1.24372	0.8108	1	ADAM10	Homo sapiens	ADAM metallopeptidase domain 10	NP_001101.1
dd_Smed_v6_4248_0	0.163046	0.208614	1.27948	0.808861	1	TMF1	Homo sapiens	TATA element modulatory factor 1	NP_009045.2
dd_Smed_v6_8702_1	0.250887	0.314379	1.25307	0.808507	1
dd_Smed_v6_5144_0	0.662444	0.789265	1.19144	0.807205	1	KIAA1324L	Homo sapiens	KIAA1324-like	NP_001136221.1
dd_Smed_v6_981_0	0.284625	0.336124	1.18094	0.806984	1	ATP5O	Homo sapiens	ATP synthase, H transporting, mitochondrial F1 complex, O subunit	NP_001688.1
dd_Smed_v6_6635_0	0.83236	0.944278	1.13446	0.805129	1	SCAPER	Homo sapiens	S-phase cyclin A-associated protein in the ER	NP_001139395.1
dd_Smed_v6_5207_0	0.165064	0.205649	1.24587	0.804064	1	LOC101163523	Oryzias latipes	macrophage mannose receptor 1-like	XP_004079567.1
dd_Smed_v6_858_0	0.419862	0.478945	1.14072	0.803382	1
dd_Smed_v6_1039_0	0.715917	0.807927	1.12852	0.802971	1	IscW	Ixodes scapularis	secreted salivary gland peptide, putative	XP_002411887.1
dd_Smed_v6_1461_0	0.269593	0.320796	1.18993	0.802718	1	ATPsyn-d	Drosophila melanogaster	ATP synthase, subunit d	NP_524402.1
dd_Smed_v6_8247_0	0.345815	0.429478	1.24193	0.797191	1
dd_Smed_v6_5933_0	0.168528	0.213947	1.26951	0.796743	1	LOC100167956	Acyrthosiphon pisum	zinc finger MYM-type protein 1-like	XP_001943532.2
dd_Smed_v6_3061_0	0.338137	0.395389	1.16932	0.795522	1	IscW	Ixodes scapularis	Ran-binding protein, putative	XP_002435675.1
dd_Smed_v6_2102_0	0.448632	0.51535	1.14872	0.795513	1	PA2G4	Homo sapiens	proliferation-associated 2G4	NP_006182.2
dd_Smed_v6_10700_0	0.21501	0.259994	1.20922	0.795508	1	GPATCH1	Homo sapiens	G-patch domain containing 1	NP_060495.2
dd_Smed_v6_5142_0	0.367831	0.424722	1.15467	0.79474	1
dd_Smed_v6_5929_0	0.281302	0.336835	1.19741	0.793327	1	GRK6	Homo sapiens	G protein-coupled receptor kinase 6	NP_001004105.1
dd_Smed_v6_4380_0	0.233614	0.327815	1.40324	0.792636	1
dd_Smed_v6_2152_0	0.337211	0.393418	1.16668	0.792613	1	CLPTM1	Homo sapiens	CLPTM1, transmembrane protein	NP_001285.1
dd_Smed_v6_720_0	0.144209	0.182879	1.26815	0.792428	1	Atp5c1	Mus musculus	ATP synthase, H transporting, mitochondrial F1 complex, gamma polypeptide 1	NP_065640.2
dd_Smed_v6_1913_0	0.17184	0.214821	1.25012	0.790417	1	PSMD13	Homo sapiens	proteasome 26S subunit, non-ATPase 13	NP_002808.3
dd_Smed_v6_4723_0	0.143317	0.177327	1.2373	0.789251	1	LOC100167671	Acyrthosiphon pisum	COP9 signalosome complex subunit 8	XP_001950002.1
dd_Smed_v6_434_0	1.2313	1.33556	1.08467	0.788917	1	Abcf2	Mus musculus	ATP-binding cassette, sub-family F (GCN20), member 2	NP_038881.1
dd_Smed_v6_5665_0	0.167451	0.209519	1.25122	0.788893	1	AgaP	Anopheles gambiae str. PEST	AGAP003004-PA	XP_311879.5
dd_Smed_v6_2722_0	0.137346	0.170994	1.24499	0.788296	1	TACO1	Homo sapiens	translational activator of cytochrome c oxidase I	NP_057444.2
dd_Smed_v6_2048_0	0.156721	0.194833	1.24319	0.787981	1
dd_Smed_v6_20599_0	0.2967	0.36168	1.21901	0.787031	1	ACA1	Acanthamoeba castellanii str. Neff	GapPol polyprotein	XP_004336571.1
dd_Smed_v6_5172_0	0.162752	0.201078	1.23548	0.782896	1	ASPSCR1	Homo sapiens	alveolar soft part sarcoma chromosome region, candidate 1	NP_076988.1
dd_Smed_v6_7185_0	0.255781	0.313405	1.22529	0.781117	1	KCNAB2	Homo sapiens	potassium voltage-gated channel subfamily A regulatory beta subunit 2	NP_742128.1
dd_Smed_v6_3359_0	0.189483	0.230025	1.21396	0.779582	1	PAFAH1B1	Homo sapiens	platelet activating factor acetylhydrolase 1b regulatory subunit 1	NP_000421.1
dd_Smed_v6_11145_0	0.63687	0.782094	1.22803	0.77813	1	RECQL5	Homo sapiens	RecQ protein-like 5	XP_005257875.1
dd_Smed_v6_700_0	0.214287	0.264422	1.23396	0.776761	1
dd_Smed_v6_3630_0	0.223568	0.280095	1.25284	0.776143	1	APMAP	Homo sapiens	adipocyte plasma membrane associated protein	NP_065392.1
dd_Smed_v6_17809_0	0.250256	0.302174	1.20746	0.775034	1	LOC101241532	Hydra vulgaris	uncharacterized LOC101241532	XP_004209177.1
dd_Smed_v6_435_0	0.497192	0.565816	1.13802	0.774478	1	Cct3	Mus musculus	chaperonin containing Tcp1, subunit 3 (gamma)	NP_033966.1
dd_Smed_v6_1101_0	0.242425	0.286345	1.18117	0.774227	1
dd_Smed_v6_4884_0	0.270322	0.331767	1.2273	0.773889	1
dd_Smed_v6_4590_0	0.183531	0.22305	1.21533	0.773859	1	UFC1	Homo sapiens	ubiquitin-fold modifier conjugating enzyme 1	NP_057490.2
dd_Smed_v6_3700_0	0.671484	0.771293	1.14864	0.773581	1
dd_Smed_v6_3741_0	0.497177	0.566633	1.1397	0.77325	1
dd_Smed_v6_2933_0	0.152988	0.188848	1.2344	0.773047	1
dd_Smed_v6_2233_0	0.201544	0.244703	1.21414	0.770842	1	DDX1	Homo sapiens	DEAD/H-box helicase 1	NP_004930.1
dd_Smed_v6_8258_0	0.381188	0.456364	1.19722	0.77023	1
dd_Smed_v6_5155_0	0.402902	0.491571	1.22008	0.768502	1
dd_Smed_v6_6640_0	0.194346	0.257447	1.32468	0.767544	1	LMF2	Homo sapiens	lipase maturation factor 2	NP_149977.2
dd_Smed_v6_993_0	0.171622	0.210698	1.22768	0.765519	1
dd_Smed_v6_721_0	0.225378	0.26808	1.18947	0.76503	1	EIF3I	Homo sapiens	eukaryotic translation initiation factor 3 subunit I	NP_003748.1
dd_Smed_v6_11756_0	0.349091	0.436909	1.25156	0.764854	1	IMG5	Ichthyophthirius multifiliis	protein kinase domain protein	XP_004027516.1
dd_Smed_v6_623_0	0.280392	0.329206	1.17409	0.762875	1	ACTR2	Homo sapiens	ARP2 actin-related protein 2 homolog (yeast)	NP_005713.1
dd_Smed_v6_458_0	0.685801	0.769355	1.12183	0.762693	1	UBB	Homo sapiens	ubiquitin B	NP_061828.1
dd_Smed_v6_3181_0	0.242182	0.288301	1.19044	0.761984	1	DDX46	Homo sapiens	DEAD-box helicase 46	NP_055644.2
dd_Smed_v6_12964_0	0.171167	0.208563	1.21848	0.761083	1	Slc13a2	Mus musculus	solute carrier family 13 (sodium-dependent dicarboxylate transporter), member 2	XP_006532708.1
dd_Smed_v6_3427_0	0.206692	0.250093	1.20998	0.760237	1	Uggt1	Mus musculus	UDP-glucose glycoprotein glucosyltransferase 1	XP_006496125.1
dd_Smed_v6_8225_0	0.247734	0.306841	1.23859	0.758752	1	RANBP10	Homo sapiens	RAN binding protein 10	NP_065901.1
dd_Smed_v6_6016_0	0.320354	0.383947	1.19851	0.757692	1
dd_Smed_v6_3574_2	0.778013	0.861511	1.10732	0.756317	1
dd_Smed_v6_2557_0	0.299787	0.352633	1.17628	0.752896	1	TMED7	Homo sapiens	transmembrane emp24 protein transport domain containing 7	NP_861974.1
dd_Smed_v6_12389_0	0.235588	0.278586	1.18251	0.751635	1
dd_Smed_v6_6564_0	0.240289	0.311127	1.2948	0.748695	1	LOC100120254	Nasonia vitripennis	myotubularin-related protein 14	XP_001603912.2
dd_Smed_v6_1690_0	0.526384	0.605289	1.1499	0.745641	1	CPPED1	Homo sapiens	calcineurin like phosphoesterase domain containing 1	NP_060810.2
dd_Smed_v6_1978_0	0.256293	0.30423	1.18704	0.743975	1	AP3B2	Homo sapiens	adaptor related protein complex 3 beta 2 subunit	NP_004635.2
dd_Smed_v6_7977_0	0.258299	0.305427	1.18246	0.743273	1	RAB3C	Homo sapiens	RAB3C, member RAS oncogene family	NP_612462.1
dd_Smed_v6_3625_0	0.168323	0.203374	1.20824	0.740136	1	HNRNPA2B1	Homo sapiens	heterogeneous nuclear ribonucleoprotein A2/B1	NP_002128.1
dd_Smed_v6_3866_0	1.02429	1.17858	1.15064	0.740081	1	SRSF1	Homo sapiens	serine/arginine-rich splicing factor 1	NP_001071634.1
dd_Smed_v6_9036_0	0.16122	0.195924	1.21526	0.740041	1	TCTEX1D4	Homo sapiens	Tctex1 domain containing 4	NP_001013654.1
dd_Smed_v6_1402_0	1.0075	1.10836	1.10011	0.739605	1	TPI1	Homo sapiens	triosephosphate isomerase 1	NP_000356.1
dd_Smed_v6_4610_0	0.233699	0.288303	1.23365	0.739107	1
dd_Smed_v6_3480_0	1.02859	1.21742	1.18358	0.738861	1	EXOC3	Homo sapiens	exocyst complex component 3	NP_009208.2
dd_Smed_v6_2236_0	0.510085	0.583506	1.14394	0.737914	1	Dgri	Drosophila grimshawi	GH13017 gene product from transcript GH13017-RA	XP_001993524.1
dd_Smed_v6_5689_0	0.152715	0.189383	1.24011	0.734218	1	TRAF3	Homo sapiens	TNF receptor associated factor 3	NP_003291.2
dd_Smed_v6_1280_0	0.336966	0.389872	1.15701	0.732782	1	PPP2CA	Homo sapiens	protein phosphatase 2 catalytic subunit alpha	NP_002706.1
dd_Smed_v6_1651_0	0.286059	0.333394	1.16547	0.731031	1	RRM1	Homo sapiens	ribonucleotide reductase catalytic subunit M1	NP_001024.1
dd_Smed_v6_4481_0	0.153608	0.187782	1.22248	0.728224	1	EEFSEC	Homo sapiens	eukaryotic elongation factor, selenocysteine-tRNA-specific	NP_068756.2
dd_Smed_v6_12951_0	0.17702	0.214538	1.21194	0.726598	1	ZBED5	Homo sapiens	zinc finger BED-type containing 5	NP_067034.2
dd_Smed_v6_539_0	0.864066	0.951778	1.10151	0.726186	1	ARFGAP2	Homo sapiens	ADP ribosylation factor GTPase activating protein 2	XP_005253225.1
dd_Smed_v6_1408_0	0.414703	0.471591	1.13718	0.725766	1
dd_Smed_v6_879_0	0.603039	0.672539	1.11525	0.725403	1	Hist1h2ba	Mus musculus	histone cluster 1, H2ba	NP_783594.1
dd_Smed_v6_3052_0	0.165024	0.207034	1.25457	0.725309	1
dd_Smed_v6_6398_0	0.186595	0.224293	1.20203	0.724573	1
dd_Smed_v6_1807_0	0.470874	0.535425	1.13709	0.723006	1	ATAD3B	Homo sapiens	ATPase family, AAA domain containing 3B	XP_005244863.1
dd_Smed_v6_12980_0	0.157187	0.193664	1.23206	0.722461	1	SENP7	Homo sapiens	SUMO1/sentrin specific peptidase 7	NP_001269732.1
dd_Smed_v6_2919_0	0.246092	0.289112	1.17481	0.722085	1	EIF4E1B	Homo sapiens	eukaryotic translation initiation factor 4E family member 1B	NP_001092878.1
dd_Smed_v6_9148_0	0.155182	0.194718	1.25477	0.721681	1
dd_Smed_v6_5675_0	9.14874	9.69357	1.05955	0.719066	1
dd_Smed_v6_3484_0	0.86587	1.00674	1.16269	0.718244	1	MPPED1	Homo sapiens	metallophosphoesterase domain containing 1	NP_001037835.1
dd_Smed_v6_3358_0	0.18403	0.221962	1.20612	0.715856	1	TMEM33	Homo sapiens	transmembrane protein 33	NP_060596.2
dd_Smed_v6_2667_0	0.53842	0.615905	1.14391	0.715081	1	ARL8B	Homo sapiens	ADP ribosylation factor like GTPase 8B	NP_060654.1
dd_Smed_v6_1442_0	0.197587	0.236467	1.19677	0.712327	1	Uqcrb	Mus musculus	ubiquinol-cytochrome c reductase binding protein	NP_080495.1
dd_Smed_v6_5870_0	0.166928	0.210066	1.25843	0.711205	1
dd_Smed_v6_11018_0	0.195138	0.240551	1.23272	0.710037	1
dd_Smed_v6_12213_0	0.173233	0.221757	1.2801	0.708045	1	RMDN1	Homo sapiens	regulator of microtubule dynamics 1	NP_057117.2
dd_Smed_v6_6481_0	0.382268	0.447475	1.17058	0.706134	1
dd_Smed_v6_2185_0	0.292208	0.347553	1.1894	0.704394	1
dd_Smed_v6_3868_0	0.281285	0.334474	1.18909	0.702893	1	LOC100267800	Vitis vinifera	RING-H2 finger protein ATL7-like	XP_002270058.1
dd_Smed_v6_5649_1	0.213805	0.253688	1.18654	0.701306	1	RNF123	Homo sapiens	ring finger protein 123	NP_071347.2
dd_Smed_v6_5741_0	0.468199	0.544247	1.16243	0.69883	1	PAK3	Homo sapiens	p21 protein (Cdc42/Rac)-activated kinase 3	NP_002569.1
dd_Smed_v6_2319_0	0.268327	0.314879	1.17349	0.698638	1	TMEM57	Homo sapiens	transmembrane protein 57	XP_005245988.1
dd_Smed_v6_7133_0	0.406604	0.478864	1.17772	0.695888	1	mapta	Danio rerio	microtubule-associated protein tau a	XP_001340566.4
dd_Smed_v6_2613_0	0.7262	0.81517	1.12251	0.695535	1	ppp2r5c	Xenopus tropicalis	protein phosphatase 2 regulatory subunit B', gamma	NP_989248.1
dd_Smed_v6_3543_0	0.275897	0.321027	1.16358	0.69499	1	UBE2B	Homo sapiens	ubiquitin conjugating enzyme E2 B	NP_003328.1
dd_Smed_v6_17011_0	0.204653	0.249472	1.219	0.694926	1
dd_Smed_v6_1531_0	0.257434	0.320797	1.24613	0.692385	1
dd_Smed_v6_854_0	0.922511	1.01821	1.10374	0.691898	1	DIP2C	Homo sapiens	disco interacting protein 2 homolog C	NP_055789.1
dd_Smed_v6_3540_0	0.644764	0.754513	1.17022	0.690306	1	CDK11B	Homo sapiens	cyclin-dependent kinase 11B	NP_277022.1
dd_Smed_v6_5734_0	0.538711	0.626937	1.16377	0.689912	1	Polg	Mus musculus	polymerase (DNA directed), gamma	XP_006540771.1
dd_Smed_v6_4686_0	0.212735	0.258033	1.21293	0.689267	1
dd_Smed_v6_6203_0	0.461939	0.534614	1.15733	0.688108	1	Edrf1	Mus musculus	erythroid differentiation regulatory factor 1	NP_835216.3
dd_Smed_v6_3020_0	0.443778	0.513956	1.15814	0.685504	1
dd_Smed_v6_2904_0	0.230159	0.268409	1.16619	0.685478	1	BRAFLDRAFT	Branchiostoma floridae	hypothetical protein	XP_002613931.1
dd_Smed_v6_9075_0	0.367685	0.427139	1.1617	0.684553	1	SYK	Homo sapiens	spleen tyrosine kinase	NP_003168.2
dd_Smed_v6_2617_0	0.319533	0.366159	1.14592	0.683556	1	LARP1B	Homo sapiens	La ribonucleoprotein domain family, member 1B	XP_005263157.1
dd_Smed_v6_3049_0	0.225883	0.267994	1.18643	0.683295	1	HTT	Homo sapiens	huntingtin	NP_002102.4
dd_Smed_v6_9006_0	0.216157	0.260028	1.20296	0.680674	1	INSR	Homo sapiens	insulin receptor	NP_001073285.1
dd_Smed_v6_7459_0	0.189083	0.228368	1.20777	0.675641	1
dd_Smed_v6_2141_0	0.401301	0.478783	1.19308	0.675637	1	ACTR10	Homo sapiens	actin-related protein 10 homolog (S. cerevisiae)	NP_060947.1
dd_Smed_v6_7246_0	0.46076	0.521541	1.13191	0.672685	1
dd_Smed_v6_2684_0	0.186103	0.221189	1.18853	0.66871	1	TOMM20	Homo sapiens	translocase of outer mitochondrial membrane 20	NP_055580.1
dd_Smed_v6_2253_0	0.227642	0.270713	1.1892	0.66502	1	LIN37	Homo sapiens	lin-37 DREAM MuvB core complex component	NP_061977.1
dd_Smed_v6_7529_0	0.177788	0.21245	1.19496	0.663385	1
dd_Smed_v6_2801_0	0.156305	0.189493	1.21233	0.658342	1	DNAJC11	Homo sapiens	DnaJ heat shock protein family (Hsp40) member C11	NP_060668.2
dd_Smed_v6_2612_0	0.264609	0.307613	1.16252	0.657475	1	rbms1	Astyanax mexicanus	RNA binding motif, single stranded interacting protein 1	XP_007237398.1
dd_Smed_v6_2579_0	0.591975	0.668397	1.1291	0.657438	1	Dnajc13	Mus musculus	DnaJ heat shock protein family (Hsp40) member C13	NP_001156498.1
dd_Smed_v6_2693_0	0.399227	0.452068	1.13236	0.657375	1	CD9	Homo sapiens	CD9 molecule	NP_001760.1
dd_Smed_v6_8147_0	0.231448	0.275017	1.18824	0.656741	1
dd_Smed_v6_2497_0	0.37106	0.421127	1.13493	0.655394	1	CG1416	Drosophila melanogaster	CG1416 gene product from transcript CG1416-RA	NP_610121.2
dd_Smed_v6_6366_0	0.197818	0.249265	1.26007	0.653151	1	B3GALTL	Homo sapiens	beta 1,3-galactosyltransferase-like	NP_919299.3
dd_Smed_v6_1873_0	0.391519	0.46578	1.18967	0.650235	1	LOC101470915	Maylandia zebra	protein transport protein Sec16B-like	XP_004552967.1
dd_Smed_v6_1096_0	0.439764	0.491911	1.11858	0.65016	1	NME1	Homo sapiens	NME/NM23 nucleoside diphosphate kinase 1	NP_000260.1
dd_Smed_v6_8152_0	0.252239	0.29065	1.15228	0.649791	1	Tcf7l2	Mus musculus	transcription factor 7 like 2, T cell specific, HMG box	NP_001136396.1
dd_Smed_v6_6479_0	0.159397	0.195562	1.22689	0.648549	1
dd_Smed_v6_9784_0	1.34671	1.49083	1.10702	0.648422	1
dd_Smed_v6_9377_0	0.35398	0.422908	1.19472	0.647923	1
dd_Smed_v6_5165_0	0.355803	0.408969	1.14942	0.646592	1	KMT2C	Homo sapiens	lysine (K)-specific methyltransferase 2C	NP_733751.2
dd_Smed_v6_152_0	0.197486	0.229731	1.16328	0.64634	1	TUBB4B	Homo sapiens	tubulin beta 4B class IVb	NP_006079.1
dd_Smed_v6_4151_0	0.15974	0.193468	1.21114	0.643484	1
dd_Smed_v6_11134_0	0.181825	0.225361	1.23944	0.643278	1
dd_Smed_v6_3372_0	0.186197	0.219189	1.17719	0.642105	1	MROH1	Homo sapiens	maestro heat like repeat family member 1	NP_115826.2
dd_Smed_v6_12594_0	0.204602	0.239178	1.16899	0.641792	1	RYK	Homo sapiens	receptor-like tyrosine kinase	NP_002949.2
dd_Smed_v6_3707_0	0.392567	0.449391	1.14475	0.641187	1	LMNA	Homo sapiens	lamin A/C	NP_005563.1
dd_Smed_v6_9938_0	0.146738	0.176377	1.20199	0.641063	1	LOC100180023	Ciona intestinalis	universal stress protein A-like protein	XP_002130444.1
dd_Smed_v6_4415_0	0.690069	0.760472	1.10202	0.637515	1	mxd3	Cynoglossus semilaevis	MAX dimerization protein 3	XP_008325468.1
dd_Smed_v6_8601_0	0.162498	0.194137	1.1947	0.635568	1	CXXC1	Homo sapiens	CXXC finger protein 1	NP_001095124.1
dd_Smed_v6_1527_0	0.188746	0.22014	1.16633	0.63329	1	DNAJA1	Homo sapiens	DnaJ (Hsp40) homolog, subfamily A, member 1	NP_001530.1
dd_Smed_v6_2640_0	0.241249	0.278174	1.15306	0.632561	1
dd_Smed_v6_5772_0	0.17831	0.209648	1.17575	0.6324	1	TXLNA	Homo sapiens	taxilin alpha	XP_005270651.1
dd_Smed_v6_3489_0	0.185617	0.219084	1.1803	0.631277	1	LOC100165510	Acyrthosiphon pisum	polyglutamine-binding protein 1	NP_001280384.1
dd_Smed_v6_1265_0	0.310631	0.35326	1.13723	0.629729	1	SSR3	Homo sapiens	signal sequence receptor subunit 3	NP_009038.1
dd_Smed_v6_6085_0	0.323182	0.37078	1.14728	0.626591	1	LOC101851026	Aplysia californica	uncharacterized LOC101851026	XP_005094522.1
dd_Smed_v6_2264_0	0.383269	0.442588	1.15477	0.623699	1	SRGAP3	Homo sapiens	SLIT-ROBO Rho GTPase activating protein 3	XP_005265679.1
dd_Smed_v6_4137_0	0.277617	0.316652	1.14061	0.623171	1	EIF4H	Chelonia mydas	eukaryotic translation initiation factor 4H	XP_007054257.1
dd_Smed_v6_2714_0	0.205888	0.241478	1.17286	0.623042	1	DESI2	Homo sapiens	desumoylating isopeptidase 2	NP_057160.2
dd_Smed_v6_12680_0	0.89706	1.0095	1.12535	0.622677	1
dd_Smed_v6_3402_0	0.360285	0.424407	1.17798	0.61892	1	NUB1	Homo sapiens	negative regulator of ubiquitin-like proteins 1	XP_005250069.1
dd_Smed_v6_649_0	0.196337	0.232645	1.18493	0.618657	1	col1a1	Maylandia zebra	collagen, type I, alpha 1	XP_004572576.1
dd_Smed_v6_4651_0	0.174001	0.212675	1.22226	0.618516	1	LOC101855839	Aplysia californica	prostaglandin F synthase-like	XP_005089972.1
dd_Smed_v6_10827_0	0.18602	0.225302	1.21117	0.616065	1	CPC735	Coccidioides posadasii C735 delta SOWgp	elongation factor, putative	XP_003065937.1
dd_Smed_v6_3715_0	0.120323	0.144279	1.1991	0.615803	1	LOC656088	Tribolium castaneum	39S ribosomal protein L38, mitochondrial	XP_967732.1
dd_Smed_v6_764_0	0.276806	0.317043	1.14536	0.615351	1	GTPBP4	Homo sapiens	GTP binding protein 4	NP_036473.2
dd_Smed_v6_11814_0	0.431559	0.486377	1.12702	0.614859	1
dd_Smed_v6_9859_1	0.163682	0.193326	1.18111	0.613403	1
dd_Smed_v6_9947_0	0.29009	0.357457	1.23223	0.612989	1
dd_Smed_v6_4021_0	0.490283	0.56182	1.14591	0.611337	1
dd_Smed_v6_9205_0	0.625245	0.71641	1.14581	0.609935	1	KIAA1432	Homo sapiens	KIAA1432	NP_001129392.2
dd_Smed_v6_20228_0	0.123984	0.147264	1.18776	0.609919	1	GfIV	Glypta fumiferanae ichnovirus	GfV-C17-ORF1	YP_001029420.1
dd_Smed_v6_2392_0	2.51255	2.68752	1.06964	0.608598	1	RBM10	Homo sapiens	RNA binding motif protein 10	NP_690595.1
dd_Smed_v6_4799_0	0.696346	0.789415	1.13365	0.605765	1	WAPAL	Homo sapiens	wings apart-like homolog (Drosophila)	NP_055860.1
dd_Smed_v6_8836_0	0.147173	0.175959	1.19559	0.603355	1	MED23	Homo sapiens	mediator complex subunit 23	NP_001257451.1
dd_Smed_v6_5190_0	0.160347	0.189631	1.18263	0.60244	1
dd_Smed_v6_8089_0	0.163499	0.190832	1.16718	0.59987	1	ABLIM1	Chrysemys picta bellii	actin binding LIM protein 1	XP_005293927.1
dd_Smed_v6_3662_0	0.188105	0.21743	1.1559	0.598752	1	XRN1	Homo sapiens	5'-3' exoribonuclease 1	NP_001269788.1
dd_Smed_v6_8467_0	1.08595	1.2042	1.1089	0.598095	1	Depdc5	Mus musculus	DEP domain containing 5	NP_808454.2
dd_Smed_v6_2525_0	0.959093	1.06744	1.11297	0.597509	1	TRIP12	Homo sapiens	thyroid hormone receptor interactor 12	NP_001271145.1
dd_Smed_v6_2398_0	0.252909	0.293272	1.15959	0.597231	1	AT2G43465	Arabidopsis thaliana	RNA-binding ASCH domain protein	NP_001154572.1
dd_Smed_v6_3077_0	0.306114	0.34772	1.13592	0.5972	1	ABCC1	Homo sapiens	ATP binding cassette subfamily C member 1	NP_004987.2
dd_Smed_v6_11184_0	0.260398	0.302982	1.16353	0.594461	1	PNPLA7	Homo sapiens	patatin like phospholipase domain containing 7	XP_006717165.1
dd_Smed_v6_990_0	0.155506	0.186427	1.19883	0.593127	1	CALU	Homo sapiens	calumenin	NP_001210.1
dd_Smed_v6_7610_0	0.302364	0.354728	1.17318	0.591878	1	PPFIBP1	Homo sapiens	PTPRF interacting protein, binding protein 1 (liprin beta 1)	XP_006719222.1
dd_Smed_v6_3471_0	0.118089	0.140621	1.1908	0.590927	1	MARS	Homo sapiens	methionyl-tRNA synthetase	NP_004981.2
dd_Smed_v6_8776_0	0.17963	0.217873	1.21289	0.588268	1	AT1G70150	Arabidopsis thaliana	zinc ion binding protein	NP_177172.6
dd_Smed_v6_2489_0	0.230959	0.266675	1.15464	0.584306	1	TM2D1	Homo sapiens	TM2 domain containing 1	NP_114416.1
dd_Smed_v6_4122_0	0.705198	0.789742	1.11989	0.580546	1
dd_Smed_v6_8973_0	0.135289	0.162511	1.20121	0.579302	1	LTK	Homo sapiens	leukocyte receptor tyrosine kinase	XP_005254439.1
dd_Smed_v6_2865_0	0.205228	0.238954	1.16433	0.57924	1	NDUFS4	Homo sapiens	NADH dehydrogenase (ubiquinone) Fe-S protein 4, 18kDa (NADH-coenzyme Q reductase)	NP_002486.1
dd_Smed_v6_4301_0	0.300159	0.351453	1.17089	0.578832	1	AGAP3	Homo sapiens	ArfGAP with GTPase domain, ankyrin repeat and PH domain 3	NP_001268229.1
dd_Smed_v6_4065_0	0.336129	0.376183	1.11916	0.578563	1	DCTN1	Homo sapiens	dynactin subunit 1	NP_001128512.1
dd_Smed_v6_12683_1	0.226419	0.262773	1.16056	0.578023	1
dd_Smed_v6_2953_0	0.156453	0.185137	1.18334	0.577408	1	Dvir	Drosophila virilis	GJ23832 gene product from transcript GJ23832-RA	XP_002053352.1
dd_Smed_v6_20214_0	0.261041	0.31188	1.19476	0.576694	1
dd_Smed_v6_24776_0	0.236168	0.273464	1.15793	0.575704	1
dd_Smed_v6_847_0	0.392794	0.437126	1.11286	0.575229	1	CCT7	Homo sapiens	chaperonin containing TCP1 subunit 7	NP_006420.1
dd_Smed_v6_17076_0	0.528948	0.606615	1.14683	0.573278	1	BRAFLDRAFT	Branchiostoma floridae	hypothetical protein	XP_002586118.1
dd_Smed_v6_1722_0	0.138146	0.163644	1.18458	0.571394	1	Ptcd3	Mus musculus	pentatricopeptide repeat domain 3	NP_081551.2
dd_Smed_v6_7863_0	0.201938	0.239116	1.18411	0.571272	1
dd_Smed_v6_470_0	0.254851	0.288976	1.1339	0.568714	1
dd_Smed_v6_3607_0	0.144719	0.168886	1.167	0.567155	1	Mrps33	Mus musculus	mitochondrial ribosomal protein S33	NP_034400.1
dd_Smed_v6_935_0	0.248345	0.282467	1.13739	0.565346	1	LOC102809578	Saccoglossus kowalevskii	uncharacterized LOC102809578	XP_006812323.1
dd_Smed_v6_2166_0	0.144604	0.170243	1.17731	0.564242	1	MRPL12	Homo sapiens	mitochondrial ribosomal protein L12	NP_002940.2
dd_Smed_v6_3937_0	0.21108	0.241171	1.14256	0.561388	1	LTN1	Homo sapiens	listerin E3 ubiquitin protein ligase 1	NP_056380.2
dd_Smed_v6_8703_0	0.237699	0.272204	1.14517	0.561338	1	MAN2A1	Homo sapiens	mannosidase alpha class 2A member 1	NP_002363.2
dd_Smed_v6_2601_0	0.190628	0.220546	1.15695	0.559298	1	LOC101460837	Ceratitis capitata	protein PET100 homolog, mitochondrial-like	XP_004522790.1
dd_Smed_v6_4588_0	0.358451	0.41075	1.1459	0.557979	1	PAN3	Homo sapiens	PAN3 poly(A) specific ribonuclease subunit	XP_006719865.1
dd_Smed_v6_6443_0	0.161778	0.191523	1.18386	0.556566	1
dd_Smed_v6_22256_0	0.419781	0.467492	1.11366	0.556545	1
dd_Smed_v6_6140_0	0.13894	0.163434	1.17629	0.555555	1	NCBP1	Homo sapiens	nuclear cap binding protein subunit 1	NP_002477.1
dd_Smed_v6_1811_0	0.256123	0.289854	1.1317	0.553782	1	DNAJC7	Homo sapiens	DnaJ heat shock protein family (Hsp40) member C7	NP_003306.3
dd_Smed_v6_4074_0	0.479325	0.545344	1.13773	0.553455	1	RNF31	Homo sapiens	ring finger protein 31	NP_060469.4
dd_Smed_v6_13855_0	0.20082	0.229746	1.14404	0.54999	1
dd_Smed_v6_4092_0	0.390358	0.441401	1.13076	0.549182	1
dd_Smed_v6_9922_0	0.154008	0.178469	1.15883	0.549037	1	LOC101887110	Danio rerio	NF-kappa-B inhibitor-like protein 1-like	XP_005155508.1
dd_Smed_v6_4002_0	0.365587	0.416232	1.13853	0.546605	1
dd_Smed_v6_668_0	0.876112	0.939826	1.07272	0.546528	1	ST13	Homo sapiens	suppression of tumorigenicity 13 (colon carcinoma) (Hsp70 interacting protein)	NP_001265518.1
dd_Smed_v6_1246_0	0.28987	0.32415	1.11826	0.541964	1
dd_Smed_v6_1019_0	0.264606	0.297021	1.1225	0.54118	1	LOC103524938	Diaphorina citri	type II inositol 1,4,5-trisphosphate 5-phosphatase-like	XP_008488201.1
dd_Smed_v6_10369_0	0.594698	0.655402	1.10208	0.540135	1	CNTRL	Homo sapiens	centriolin	XP_006717007.1
dd_Smed_v6_5541_0	0.151228	0.18213	1.20434	0.540009	1
dd_Smed_v6_9208_0	0.299985	0.337875	1.12631	0.539539	1	ABCC2	Homo sapiens	ATP binding cassette subfamily C member 2	NP_000383.1
dd_Smed_v6_10180_0	0.147059	0.171245	1.16446	0.538643	1	WDR46	Homo sapiens	WD repeat domain 46	NP_001157739.1
dd_Smed_v6_12317_0	0.195047	0.231858	1.18873	0.53697	1
dd_Smed_v6_7093_0	0.258197	0.291973	1.13081	0.536353	1
dd_Smed_v6_5813_0	0.152662	0.18203	1.19237	0.535426	1	PPME1	Homo sapiens	protein phosphatase methylesterase 1	NP_001258522.1
dd_Smed_v6_16446_0	0.239348	0.279492	1.16772	0.533478	1	LOC100890274	Strongylocentrotus purpuratus	latrophilin-1	XP_003727174.1
dd_Smed_v6_3250_0	0.307669	0.342838	1.11431	0.533469	1	Ddx54	Mus musculus	DEAD (Asp-Glu-Ala-Asp) box polypeptide 54	NP_082317.1
dd_Smed_v6_1055_0	0.175957	0.202816	1.15265	0.530102	1
dd_Smed_v6_4153_0	0.22893	0.25802	1.12707	0.528987	1	Acci	Bombyx mori	apoptotic chromatin condensation inducer-like protein	NP_001138798.1
dd_Smed_v6_8860_0	0.198159	0.232397	1.17278	0.528631	1	KIF26A	Homo sapiens	kinesin family member 26A	NP_056471.1
dd_Smed_v6_4187_0	0.175341	0.204455	1.16604	0.527369	1	RNF185	Homo sapiens	ring finger protein 185	NP_689480.2
dd_Smed_v6_979_0	0.340393	0.377485	1.10897	0.527188	1	Aco2	Mus musculus	aconitase 2, mitochondrial	NP_542364.1
dd_Smed_v6_6068_0	0.224574	0.25817	1.1496	0.523064	1	USP6NL	Homo sapiens	USP6 N-terminal like	NP_001073960.1
dd_Smed_v6_10689_0	0.203075	0.239376	1.17875	0.52195	1	hbs	Drosophila melanogaster	hibris	NP_524702.3
dd_Smed_v6_2154_0	0.205135	0.233929	1.14037	0.521467	1	Adss	Mus musculus	adenylosuccinate synthetase, non muscle	NP_031448.2
dd_Smed_v6_3395_0	0.282535	0.324895	1.14993	0.520112	1	TMEM30A	Homo sapiens	transmembrane protein 30A	NP_060717.1
dd_Smed_v6_8481_0	0.508473	0.576516	1.13382	0.518121	1	METTL25	Homo sapiens	methyltransferase like 25	XP_006719699.1
dd_Smed_v6_5651_0	0.228637	0.261287	1.1428	0.517451	1
dd_Smed_v6_2595_0	0.321736	0.357502	1.11117	0.516785	1	SUPT16H	Homo sapiens	suppressor of Ty 16 homolog (S. cerevisiae)	NP_009123.1
dd_Smed_v6_4425_0	0.550206	0.605007	1.0996	0.512748	1	MARK2	Homo sapiens	MAP/microtubule affinity-regulating kinase 2	XP_006718507.1
dd_Smed_v6_835_0	0.345653	0.390812	1.13065	0.512532	1	SNX2	Homo sapiens	sorting nexin 2	NP_001265128.1
dd_Smed_v6_9455_0	0.245491	0.289282	1.17838	0.511851	1	ZRSR2	Homo sapiens	zinc finger (CCCH type), RNA-binding motif and serine/arginine rich 2	XP_005274654.1
dd_Smed_v6_15778_0	0.284301	0.326793	1.14946	0.511679	1
dd_Smed_v6_2872_0	0.345881	0.385933	1.1158	0.510388	1	GNB4	Homo sapiens	G protein subunit beta 4	NP_067642.1
dd_Smed_v6_7403_0	0.179061	0.206083	1.15091	0.509399	1	nfia	Danio rerio	nuclear factor I/A	XP_005161768.1
dd_Smed_v6_7105_0	0.24061	0.272283	1.13164	0.507692	1	SNTB1	Homo sapiens	syntrophin beta 1	NP_066301.1
dd_Smed_v6_4859_0	0.142274	0.165754	1.16503	0.506162	1	C2H6orf203	Monodelphis domestica	chromosome 2 open reading frame, human C6orf203	XP_001378591.1
dd_Smed_v6_1069_0	0.204668	0.231252	1.12989	0.504738	1	DLAT	Homo sapiens	dihydrolipoamide S-acetyltransferase	NP_001922.2
dd_Smed_v6_1502_0	0.18262	0.208467	1.14153	0.504467	1	ERP29	Homo sapiens	endoplasmic reticulum protein 29	NP_006808.1
dd_Smed_v6_2439_0	0.16114	0.184065	1.14227	0.503905	1	CHAC1	Homo sapiens	ChaC glutathione specific gamma-glutamylcyclotransferase 1	NP_077016.2
dd_Smed_v6_83_0	14.1909	14.6035	1.02908	0.502299	1	TUBB4B	Homo sapiens	tubulin beta 4B class IVb	NP_006079.1
dd_Smed_v6_4664_0	0.361947	0.400852	1.10749	0.500769	1	Thoc5	Mus musculus	THO complex 5	XP_006514511.1
dd_Smed_v6_11377_0	0.263281	0.293935	1.11643	0.497606	1	Trpm3	Mus musculus	transient receptor potential cation channel, subfamily M, member 3	NP_001030320.1
dd_Smed_v6_3130_0	0.329011	0.362417	1.10153	0.492991	1	E2F4	Homo sapiens	E2F transcription factor 4	NP_001941.2
dd_Smed_v6_7309_0	0.220903	0.255547	1.15683	0.492965	1	SMYD1	Homo sapiens	SET and MYND domain containing 1	XP_005264213.1
dd_Smed_v6_6526_0	0.224484	0.250533	1.11604	0.489903	1	SLC30A9	Homo sapiens	solute carrier family 30 member 9	NP_006336.3
dd_Smed_v6_3335_0	0.358793	0.398036	1.10937	0.488915	1	Srsf2	Mus musculus	serine/arginine-rich splicing factor 2	NP_035488.1
dd_Smed_v6_5889_0	0.18304	0.215222	1.17582	0.484853	1	MNAT1	Homo sapiens	MNAT1, CDK activating kinase assembly factor	NP_001171434.1
dd_Smed_v6_6267_0	0.190544	0.214507	1.12576	0.482494	1	PSD3	Homo sapiens	pleckstrin and Sec7 domain containing 3	XP_006716383.1
dd_Smed_v6_6778_0	0.325035	0.361109	1.11098	0.474366	1	CASZ1	Homo sapiens	castor zinc finger 1	NP_060236.3
dd_Smed_v6_3798_0	0.491961	0.538797	1.0952	0.472687	1	AaeL	Aedes aegypti	AAEL012475-PA	XP_001662603.1
dd_Smed_v6_6822_0	0.56356	0.633116	1.12342	0.472547	1	Gsg2	Mus musculus	germ cell-specific gene 2	NP_034483.1
dd_Smed_v6_825_0	0.199191	0.225912	1.13415	0.47191	1	Timm23	Acyrthosiphon pisum	translocase of inner mitochondrial membrane 23 homolog	NP_001191871.1
dd_Smed_v6_8129_0	0.526378	0.586978	1.11513	0.471475	1	PPP1R12B	Homo sapiens	protein phosphatase 1 regulatory subunit 12B	NP_001161330.1
dd_Smed_v6_1994_0	0.24801	0.275196	1.10962	0.468624	1	IscW	Ixodes scapularis	NADH:ubiquinone oxidoreductase, NDUFB6/B17 subunit, putative	XP_002415842.1
dd_Smed_v6_8650_0	0.146764	0.173634	1.18308	0.468271	1	SLC25A44	Homo sapiens	solute carrier family 25, member 44	NP_055470.1
dd_Smed_v6_1147_0	2.8546	2.96941	1.04022	0.467807	1	Tcerg1	Mus musculus	transcription elongation regulator 1 (CA150)	XP_006526178.1
dd_Smed_v6_2354_0	0.171733	0.196676	1.14524	0.464593	1	TRAF3	Homo sapiens	TNF receptor associated factor 3	NP_003291.2
dd_Smed_v6_5201_0	0.250401	0.280404	1.11982	0.462949	1	Ifih1	Mus musculus	interferon induced with helicase C domain 1	NP_001157949.1
dd_Smed_v6_3381_0	0.397439	0.434156	1.09238	0.462582	1	LOC101933242	Chrysemys picta bellii	titin	XP_008176565.1
dd_Smed_v6_1113_0	0.283578	0.314285	1.10828	0.461554	1	RAB2A	Homo sapiens	RAB2A, member RAS oncogene family	NP_002856.1
dd_Smed_v6_1594_0	0.170162	0.192637	1.13208	0.461441	1	Lsm14b	Mus musculus	LSM family member 14B	NP_808395.2
dd_Smed_v6_261_0	0.455492	0.495148	1.08706	0.461354	1	cox17	Xenopus (Silurana) tropicalis	COX17 cytochrome c oxidase copper chaperone	NP_001165070.1
dd_Smed_v6_3368_0	0.230604	0.264164	1.14553	0.460263	1	MAP3K4	Homo sapiens	mitogen-activated protein kinase kinase kinase 4	XP_005267046.1
dd_Smed_v6_1579_0	0.905649	1.06431	1.17519	0.460214	1	col4a1	Xenopus (Silurana) tropicalis	collagen alpha-1(IV) chain	XP_002933064.2
dd_Smed_v6_9072_0	0.277764	0.311822	1.12262	0.459272	1	RNASEH1	Homo sapiens	ribonuclease H1	NP_001273766.1
dd_Smed_v6_543_0	0.404242	0.440827	1.0905	0.459159	1	Slc25a3	Mus musculus	solute carrier family 25 (mitochondrial carrier, phosphate carrier), member 3	XP_006513434.1
dd_Smed_v6_787_0	0.346834	0.380504	1.09708	0.458564	1	LOC100486217	Xenopus (Silurana) tropicalis	traf2 and NCK-interacting protein kinase-like	XP_002945238.2
dd_Smed_v6_5283_0	0.28472	0.316682	1.11226	0.458367	1
dd_Smed_v6_1885_0	0.168154	0.191226	1.13721	0.450436	1	LARP1	Homo sapiens	La ribonucleoprotein domain family, member 1	NP_056130.2
dd_Smed_v6_2897_0	0.227322	0.2534	1.11472	0.448333	1
dd_Smed_v6_89_0	1.23752	1.29876	1.04948	0.448231	1	TXN	Homo sapiens	thioredoxin	NP_003320.2
dd_Smed_v6_2158_0	0.193747	0.220496	1.13806	0.443958	1	CG6852	Drosophila melanogaster	CG6852 gene product from transcript CG6852-RC	NP_649065.1
dd_Smed_v6_102_0	0.412203	0.451306	1.09486	0.443756	1
dd_Smed_v6_3713_0	0.167189	0.190169	1.13745	0.44208	1	CNIH1	Homo sapiens	cornichon family AMPA receptor auxiliary protein 1	NP_005767.1
dd_Smed_v6_5908_0	0.247495	0.273624	1.10557	0.440956	1
dd_Smed_v6_4825_0	0.199458	0.225081	1.12846	0.440928	1	Dnajb3	Mus musculus	DnaJ heat shock protein family (Hsp40) member B3	NP_032325.2
dd_Smed_v6_1743_0	0.188338	0.21607	1.14725	0.440189	1	PTPLB	Homo sapiens	protein tyrosine phosphatase-like (proline instead of catalytic arginine), member b	NP_940684.1
dd_Smed_v6_1674_0	0.196807	0.219801	1.11684	0.43971	1	NDUFS5	Saimiri boliviensis boliviensis	NADH dehydrogenase (ubiquinone) Fe-S protein 5, 15kDa (NADH-coenzyme Q reductase)	XP_003937077.1
dd_Smed_v6_7986_0	0.215775	0.239866	1.11165	0.439225	1	ARIH2	Homo sapiens	ariadne RBR E3 ubiquitin protein ligase 2	NP_006312.1
dd_Smed_v6_1174_0	0.258341	0.282793	1.09465	0.43853	1	STT3A	Homo sapiens	STT3A, catalytic subunit of the oligosaccharyltransferase complex	NP_689926.1
dd_Smed_v6_311_0	2.04195	2.1396	1.04782	0.437923	1	EDI	Entamoeba dispar SAW760	protein kinase	XP_001738940.1
dd_Smed_v6_1508_0	0.16203	0.181185	1.11822	0.436763	1	LOC100177752	Ciona intestinalis	peptidyl-prolyl cis-trans isomerase-like	XP_002129564.1
dd_Smed_v6_1029_0	0.358614	0.393326	1.0968	0.435373	1	LOC103190579	Callorhinchus milii	misshapen-like kinase 1	XP_007909604.1
dd_Smed_v6_593_1	2.91435	3.03891	1.04274	0.433143	1	AaeL	Aedes aegypti	AAEL014668-PA	XP_001649301.1
dd_Smed_v6_5441_0	0.352364	0.389933	1.10662	0.432024	1
dd_Smed_v6_8839_0	0.412723	0.449782	1.08979	0.430169	1
dd_Smed_v6_4566_0	0.595141	0.646587	1.08644	0.43013	1
dd_Smed_v6_8502_0	0.208522	0.233078	1.11776	0.429365	1	DICER1	Homo sapiens	dicer 1, ribonuclease type III	NP_085124.2
dd_Smed_v6_3921_0	0.170439	0.191774	1.12518	0.428645	1	MTOR	Homo sapiens	mechanistic target of rapamycin (serine/threonine kinase)	NP_004949.1
dd_Smed_v6_3017_0	0.430639	0.463291	1.07582	0.428214	1	RAD23A	Homo sapiens	RAD23 homolog A, nucleotide excision repair protein	NP_005044.1
dd_Smed_v6_4994_0	0.254269	0.280028	1.10131	0.427638	1	NOP56	Homo sapiens	NOP56 ribonucleoprotein	NP_006383.2
dd_Smed_v6_5431_0	0.311796	0.343863	1.10284	0.427632	1
dd_Smed_v6_9273_0	0.204263	0.230499	1.12844	0.425003	1	Egr1	Mus musculus	early growth response 1	NP_031939.1
dd_Smed_v6_1143_0	0.230482	0.255624	1.10908	0.424499	1	NUDT9	Homo sapiens	nudix hydrolase 9	NP_932155.1
dd_Smed_v6_3512_0	0.120838	0.138513	1.14627	0.42429	1	Dhrs7b	Mus musculus	dehydrogenase/reductase (SDR family) member 7B	NP_001165583.1
dd_Smed_v6_1628_0	0.213828	0.236501	1.10604	0.422439	1	DYNC1I1	Homo sapiens	dynein cytoplasmic 1 intermediate chain 1	NP_001129029.1
dd_Smed_v6_4177_0	0.399525	0.441703	1.10557	0.420351	1	ANAPC4	Homo sapiens	anaphase promoting complex subunit 4	NP_037499.2
dd_Smed_v6_13335_0	0.215885	0.24739	1.14593	0.418167	1
dd_Smed_v6_2836_0	0.376537	0.414817	1.10167	0.413201	1	APBA1	Homo sapiens	amyloid beta precursor protein binding family A member 1	XP_005252025.1
dd_Smed_v6_9908_0	0.267916	0.296691	1.10741	0.409796	1	LOC100177200	Ciona intestinalis	uncharacterized protein F54H12.2-like	XP_002123084.2
dd_Smed_v6_2251_0	1.36037	1.43704	1.05636	0.406621	1	PRPF4B	Homo sapiens	pre-mRNA processing factor 4B	NP_003904.3
dd_Smed_v6_6489_0	0.301811	0.329675	1.09232	0.404142	1	LOC100367006	Saccoglossus kowalevskii	ubiquitin carboxyl-terminal hydrolase 8-like	XP_006814000.1
dd_Smed_v6_929_0	0.247591	0.273864	1.10611	0.402414	1	Gel	Drosophila melanogaster	Gelsolin	NP_524865.2
dd_Smed_v6_4164_0	0.191371	0.213166	1.11389	0.401341	1	ZCWPW1	Homo sapiens	zinc finger, CW type with PWWP domain 1	XP_005250536.1
dd_Smed_v6_751_0	0.346334	0.374048	1.08002	0.398634	1	PPP1CA	Homo sapiens	protein phosphatase 1 catalytic subunit alpha	NP_002699.1
dd_Smed_v6_8526_0	0.460183	0.514365	1.11774	0.397325	1	MAP3K3	Homo sapiens	mitogen-activated protein kinase kinase kinase 3	XP_006721972.1
dd_Smed_v6_8176_0	0.258759	0.285414	1.10301	0.397243	1	HELZ2	Homo sapiens	helicase with zinc finger 2	NP_001032412.2
dd_Smed_v6_11153_0	0.166209	0.188175	1.13216	0.397242	1
dd_Smed_v6_2082_0	0.180284	0.199642	1.10737	0.396111	1	DDX4	Monodelphis domestica	DEAD (Asp-Glu-Ala-Asp) box polypeptide 4	XP_007486389.1
dd_Smed_v6_2029_0	0.300624	0.327153	1.08825	0.395246	1	ZFAND5	Homo sapiens	zinc finger AN1-type containing 5	NP_005998.1
dd_Smed_v6_7632_0	0.243986	0.273589	1.12133	0.395237	1	Dana	Drosophila ananassae	GF13551 gene product from transcript GF13551-RA	XP_001960805.1
dd_Smed_v6_2812_0	0.238993	0.263463	1.10239	0.392661	1	LOC100878406	Megachile rotundata	sequestosome-1-like	XP_003702345.1
dd_Smed_v6_10631_0	0.447664	0.496735	1.10962	0.391324	1
dd_Smed_v6_7698_0	0.135514	0.151513	1.11806	0.390594	1	LSG1	Homo sapiens	large 60S subunit nuclear export GTPase 1	NP_060855.2
dd_Smed_v6_17019_0	0.163645	0.184094	1.12496	0.389237	1	PCDH1	Homo sapiens	protocadherin 1	NP_001265542.1
dd_Smed_v6_638_0	0.202582	0.223693	1.10421	0.387744	1	LYPLA1	Homo sapiens	lysophospholipase I	NP_006321.1
dd_Smed_v6_461_0	1.7552	1.816	1.03464	0.384432	1	YWHAE	Homo sapiens	tyrosine 3-monooxygenase/tryptophan 5-monooxygenase activation protein epsilon	NP_006752.1
dd_Smed_v6_8506_0	0.306248	0.351417	1.14749	0.384132	1				WP_012156299.1
dd_Smed_v6_904_0	0.840363	0.882061	1.04962	0.382516	1
dd_Smed_v6_7334_0	0.207647	0.230205	1.10864	0.380388	1	Pcbp3	Mus musculus	poly(rC) binding protein 3	XP_006513984.1
dd_Smed_v6_5397_0	0.283242	0.318608	1.12486	0.377801	1	REV1	Homo sapiens	REV1, polymerase (DNA directed)	NP_001032961.1
dd_Smed_v6_1374_0	0.204619	0.224924	1.09923	0.377612	1
dd_Smed_v6_4409_0	0.268001	0.298159	1.11253	0.377076	1
dd_Smed_v6_4515_0	0.343786	0.382017	1.1112	0.376685	1	DOT1L	Homo sapiens	DOT1-like histone H3K79 methyltransferase	XP_005259716.1
dd_Smed_v6_848_0	0.243225	0.26508	1.08985	0.3754	1
dd_Smed_v6_3378_0	0.446004	0.476412	1.06818	0.371491	1	HUWE1	Homo sapiens	HECT, UBA and WWE domain containing 1, E3 ubiquitin protein ligase	NP_113584.3
dd_Smed_v6_448_0	0.322394	0.347151	1.07679	0.369291	1	CORO1C	Homo sapiens	coronin, actin binding protein, 1C	NP_055140.1
dd_Smed_v6_5082_0	0.23586	0.260568	1.10476	0.367717	1	GNAQ	Homo sapiens	G protein subunit alpha q	NP_002063.2
dd_Smed_v6_4626_0	0.159078	0.179228	1.12666	0.367029	1	Xiap	Mus musculus	X-linked inhibitor of apoptosis	NP_033818.2
dd_Smed_v6_1410_0	0.232646	0.270158	1.16124	0.362921	1
dd_Smed_v6_238_1	1.39141	2.0589	1.47973	0.361792	1
dd_Smed_v6_519_0	0.291927	0.314562	1.07753	0.360321	1	Sod1	Mus musculus	superoxide dismutase 1, soluble	NP_035564.1
dd_Smed_v6_7771_0	0.185155	0.204491	1.10443	0.35941	1	SECISBP2L	Homo sapiens	SECIS binding protein 2 like	NP_055516.2
dd_Smed_v6_3657_0	0.225626	0.246758	1.09366	0.359027	1	PHKB	Homo sapiens	phosphorylase kinase regulatory subunit beta	NP_001027005.1
dd_Smed_v6_8465_0	0.263969	0.290534	1.10063	0.358414	1	PHTF2	Homo sapiens	putative homeodomain transcription factor 2	NP_065165.3
dd_Smed_v6_4637_0	0.303724	0.335072	1.10321	0.358184	1
dd_Smed_v6_4445_0	0.284072	0.306326	1.07834	0.355836	1
dd_Smed_v6_1359_0	0.222042	0.242854	1.09373	0.355364	1	BUD31	Homo sapiens	BUD31 homolog	NP_003901.2
dd_Smed_v6_774_0	0.253144	0.273568	1.08068	0.355221	1	HERPUD1	Homo sapiens	homocysteine-inducible, endoplasmic reticulum stress-inducible, ubiquitin-like domain member 1	NP_001010989.1
dd_Smed_v6_833_0	0.365831	0.403303	1.10243	0.353278	1	atp6v0a1	Xenopus (Silurana) tropicalis	ATPase, H transporting, lysosomal V0 subunit a1	NP_001090714.1
dd_Smed_v6_5650_0	0.237189	0.257471	1.08551	0.352907	1
dd_Smed_v6_11149_0	0.249067	0.2702	1.08485	0.347791	1	TAF1	Homo sapiens	TAF1 RNA polymerase II, TATA box binding protein (TBP)-associated factor, 250kDa	NP_620278.1
dd_Smed_v6_4242_0	0.157259	0.173654	1.10425	0.34596	1	LOC103444978	Malus domestica	serine/threonine-protein kinase HT1-like	XP_008382167.1
dd_Smed_v6_5042_0	0.275837	0.300109	1.08799	0.3447	1	ATP10A	Homo sapiens	ATPase phospholipid transporting 10A (putative)	NP_077816.1
dd_Smed_v6_3002_0	1.24561	1.30037	1.04396	0.338251	1
dd_Smed_v6_288_0	0.365144	0.391602	1.07246	0.337047	1
dd_Smed_v6_9709_0	0.227577	0.246476	1.08305	0.337043	1
dd_Smed_v6_3801_0	0.217201	0.236021	1.08665	0.336011	1	Dync1li2	Mus musculus	dynein, cytoplasmic 1 light intermediate chain 2	XP_006530944.1
dd_Smed_v6_9022_0	0.182596	0.198691	1.08815	0.334006	1	TBC1D31	Homo sapiens	TBC1 domain family, member 31	XP_005251160.1
dd_Smed_v6_2651_0	0.200087	0.217878	1.08892	0.333379	1	EEF2K	Homo sapiens	eukaryotic elongation factor 2 kinase	NP_037434.1
dd_Smed_v6_10427_0	0.17384	0.192073	1.10489	0.333053	1	NR6A1	Homo sapiens	nuclear receptor subfamily 6, group A, member 1	XP_005251975.1
dd_Smed_v6_5505_0	1.06359	1.12408	1.05688	0.331201	1	ITSN1	Homo sapiens	intersectin 1	XP_005261083.1
dd_Smed_v6_9699_0	0.356616	0.391236	1.09708	0.330852	1	LOC100548960	Meleagris gallopavo	anion exchange protein 3-like	XP_003207662.1
dd_Smed_v6_6503_0	0.189305	0.207616	1.09673	0.329853	1
dd_Smed_v6_4852_0	0.304614	0.332357	1.09108	0.32843	1	COG5	Homo sapiens	component of oligomeric golgi complex 5	NP_006339.3
dd_Smed_v6_4058_0	0.178645	0.194063	1.08631	0.328216	1	PGM2	Homo sapiens	phosphoglucomutase 2	NP_060760.2
dd_Smed_v6_1411_0	0.163512	0.178735	1.0931	0.326436	1	ACAA2	Homo sapiens	acetyl-CoA acyltransferase 2	NP_006102.2
dd_Smed_v6_3626_0	0.289442	0.312409	1.07935	0.326036	1	LEMD3	Homo sapiens	LEM domain containing 3	NP_001161086.1
dd_Smed_v6_3528_0	0.188026	0.20385	1.08416	0.325042	1
dd_Smed_v6_1697_0	0.425487	0.454709	1.06868	0.324819	1	LOC100872156	Apis florea	ubiquitin	XP_003699040.1
dd_Smed_v6_7014_0	0.375804	0.401315	1.06788	0.317465	1	LOC100868686	Apis florea	oligopeptidase A-like	XP_003693249.1
dd_Smed_v6_13935_0	0.296838	0.325352	1.09606	0.317386	1	LOC101172198	Oryzias latipes	piggyBac transposable element-derived protein 4-like	XP_004079965.1
dd_Smed_v6_6242_0	0.171469	0.187329	1.09249	0.316857	1	LIAS	Homo sapiens	lipoic acid synthetase	NP_006850.2
dd_Smed_v6_3045_0	0.190391	0.207234	1.08847	0.316423	1
dd_Smed_v6_5414_0	0.151328	0.166154	1.09798	0.314468	1
dd_Smed_v6_5253_0	0.183302	0.201713	1.10044	0.312976	1	dlgap4	Danio rerio	discs, large (Drosophila) homolog-associated protein 4	XP_005168764.1
dd_Smed_v6_5697_0	0.27974	0.299938	1.0722	0.312952	1	VPS45	Homo sapiens	vacuolar protein sorting 45 homolog	NP_009190.2
dd_Smed_v6_7433_0	0.212207	0.229579	1.08186	0.312258	1	COASY	Homo sapiens	Coenzyme A synthase	NP_001035994.1
dd_Smed_v6_438_0	0.252241	0.269189	1.06719	0.309559	1	LOC102807988	Saccoglossus kowalevskii	UPF0661 TPR repeat-containing protein C16D10.01c-like	XP_006811886.1
dd_Smed_v6_3562_0	0.276568	0.30001	1.08476	0.308544	1	TRAF3	Homo sapiens	TNF receptor associated factor 3	NP_001186356.1
dd_Smed_v6_14761_0	0.308112	0.328711	1.06685	0.307731	1	LOC100571609	Acyrthosiphon pisum	ATP-dependent DNA helicase pif1-like	XP_003240824.1
dd_Smed_v6_6230_0	0.77369	0.832479	1.07599	0.307202	1	CpipJ	Culex quinquefasciatus	traf2 and nck interacting kinase, tnik	XP_001862121.1
dd_Smed_v6_3975_0	0.327785	0.354183	1.08053	0.306036	1	ARHGAP15	Homo sapiens	Rho GTPase activating protein 15	NP_060930.3
dd_Smed_v6_1563_0	0.1362	0.14837	1.08935	0.304661	1	CLINT1	Homo sapiens	clathrin interactor 1	NP_055481.1
dd_Smed_v6_4657_0	0.246259	0.268187	1.08904	0.30385	1
dd_Smed_v6_4558_0	0.169272	0.183592	1.0846	0.302738	1	UBE4A	Homo sapiens	ubiquitination factor E4A	NP_001191006.1
dd_Smed_v6_6250_0	0.263668	0.280754	1.0648	0.302255	1	LOC101859907	Aplysia californica	brain tumor protein-like	XP_005112881.1
dd_Smed_v6_6706_0	0.197951	0.219458	1.10865	0.302222	1
dd_Smed_v6_5005_0	0.872264	0.911357	1.04482	0.301317	1	AgaP	Anopheles gambiae str. PEST	AGAP010422-PA	XP_311526.4
dd_Smed_v6_1709_0	0.262312	0.281676	1.07382	0.29957	1	IscW	Ixodes scapularis	fructose-1,6-bisphosphatase, putative	XP_002434662.1
dd_Smed_v6_589_0	0.479989	0.504319	1.05069	0.295978	1	SAR1A	Homo sapiens	secretion associated Ras related GTPase 1A	NP_064535.1
dd_Smed_v6_1018_0	0.213332	0.230282	1.07946	0.292206	1	BCL2L1	Ficedula albicollis	BCL2-like 1	XP_005057273.1
dd_Smed_v6_8254_0	0.213721	0.233322	1.09171	0.290763	1	DYRK1A	Homo sapiens	dual-specificity tyrosine-(Y)-phosphorylation regulated kinase 1A	NP_569120.1
dd_Smed_v6_5911_0	0.21471	0.234163	1.0906	0.288206	1	ANKRD44	Homo sapiens	ankyrin repeat domain 44	NP_710181.2
dd_Smed_v6_784_0	0.184328	0.199903	1.08449	0.286928	1	Atox1	Drosophila melanogaster	CG32446 gene product from transcript CG32446-RA	NP_730672.1
dd_Smed_v6_5512_0	0.292235	0.311178	1.06482	0.281411	1	CycY	Drosophila melanogaster	Cyclin Y	NP_609519.1
dd_Smed_v6_12259_2	0.260346	0.281757	1.08224	0.279518	1
dd_Smed_v6_6517_0	0.165599	0.178262	1.07646	0.278064	1	PNN	Homo sapiens	pinin, desmosome associated protein	NP_002678.2
dd_Smed_v6_124_0	0.135343	0.150869	1.11472	0.27276	1	Tuba3a	Mus musculus	tubulin, alpha 3A	NP_033472.1
dd_Smed_v6_2968_0	0.426584	0.451595	1.05863	0.271333	1	PICK1	Homo sapiens	protein interacting with PRKCA 1	XP_006724442.1
dd_Smed_v6_3176_0	0.162836	0.175046	1.07498	0.266205	1	TCEA2	Homo sapiens	transcription elongation factor A2	NP_003186.1
dd_Smed_v6_13045_0	0.264345	0.279926	1.05894	0.263316	1
dd_Smed_v6_2737_0	0.170702	0.183471	1.0748	0.262773	1	TM9SF3	Homo sapiens	transmembrane 9 superfamily member 3	NP_064508.3
dd_Smed_v6_5422_0	0.203484	0.218687	1.07472	0.262317	1	AaeL	Aedes aegypti	AAEL015099-PA	XP_001647814.1
dd_Smed_v6_5708_0	0.230258	0.247826	1.0763	0.26109	1
dd_Smed_v6_8676_0	0.193865	0.211554	1.09125	0.258541	1	Ptcd1	Mus musculus	pentatricopeptide repeat domain 1	NP_598496.3
dd_Smed_v6_231_0	0.27923	0.294841	1.05591	0.257415	1	TBCA	Homo sapiens	tubulin folding cofactor A	NP_004598.1
dd_Smed_v6_1775_0	0.185925	0.199446	1.07272	0.257176	1	CG7920	Drosophila melanogaster	CG7920 gene product from transcript CG7920-RA	NP_651762.1
dd_Smed_v6_2413_0	0.254255	0.270686	1.06462	0.256132	1	PRKACA	Homo sapiens	protein kinase, cAMP-dependent, catalytic, alpha	NP_002721.1
dd_Smed_v6_154_0	0.261095	0.276174	1.05775	0.255506	1	LOC100643850	Bombus terrestris	lipid storage droplets surface-binding protein 2-like	XP_003397449.1
dd_Smed_v6_2824_0	0.598971	0.625573	1.04441	0.255168	1	HECTD1	Equus caballus	HECT domain containing E3 ubiquitin protein ligase 1	XP_001489913.2
dd_Smed_v6_1286_0	0.16462	0.177112	1.07589	0.254566	1	MAP2K6	Homo sapiens	mitogen-activated protein kinase kinase 6	NP_002749.2
dd_Smed_v6_4347_0	0.209551	0.223402	1.0661	0.25176	1
dd_Smed_v6_8421_0	0.179701	0.192075	1.06886	0.250167	1	XRCC5	Homo sapiens	X-ray repair complementing defective repair in Chinese hamster cells 5	NP_066964.1
dd_Smed_v6_6878_0	0.43979	0.45922	1.04418	0.249894	1	RAF1	Homo sapiens	Raf-1 proto-oncogene, serine/threonine kinase	XP_005265416.1
dd_Smed_v6_2402_0	0.260296	0.27391	1.0523	0.24863	1	NDUFS1	Homo sapiens	NADH:ubiquinone oxidoreductase core subunit S1	NP_004997.4
dd_Smed_v6_6170_0	0.2012	0.217591	1.08147	0.24813	1	OGFR	Homo sapiens	opioid growth factor receptor	NP_031372.2
dd_Smed_v6_1596_0	0.351486	0.369134	1.05021	0.246957	1	NUDC	Homo sapiens	nudC nuclear distribution protein	NP_006591.1
dd_Smed_v6_4924_0	0.229054	0.2439	1.06481	0.245979	1	PPP3R1	Homo sapiens	protein phosphatase 3 regulatory subunit B, alpha	NP_000936.1
dd_Smed_v6_4962_0	0.334746	0.353371	1.05564	0.245393	1	FRYL	Homo sapiens	FRY-like	NP_055845.1
dd_Smed_v6_2107_0	2.33017	2.41914	1.03818	0.245081	1
dd_Smed_v6_5368_0	0.184291	0.195884	1.06291	0.243796	1	DICPUDRAFT	Dictyostelium purpureum	hypothetical protein	XP_003291523.1
dd_Smed_v6_1237_0	1.29099	1.33493	1.03403	0.242983	1	GNG7	Homo sapiens	G protein subunit gamma 7	NP_443079.1
dd_Smed_v6_11019_0	0.245416	0.26328	1.07279	0.242485	1	DDX26B	Homo sapiens	DEAD/H (Asp-Glu-Ala-Asp/His) box polypeptide 26B	XP_006724804.1
dd_Smed_v6_2119_0	0.1987	0.210948	1.06164	0.241945	1	VDAC1	Homo sapiens	voltage dependent anion channel 1	NP_003365.1
dd_Smed_v6_13305_1	0.194556	0.212739	1.09346	0.239325	1	LOC101733787	Xenopus (Silurana) tropicalis	zinc finger MYM-type protein 1-like	XP_004911475.1
dd_Smed_v6_8904_0	0.274289	0.292462	1.06625	0.235408	1	Mier3	Mus musculus	mesoderm induction early response 1, family member 3	XP_006517679.1
dd_Smed_v6_3307_0	0.734637	0.763109	1.03876	0.23233	1	SGSM1	Homo sapiens	small G protein signaling modulator 1	NP_001091967.1
dd_Smed_v6_2811_0	0.110613	0.119018	1.07599	0.230942	1	FBL	Homo sapiens	fibrillarin	NP_001427.2
dd_Smed_v6_6166_0	0.240489	0.25365	1.05472	0.228648	1	UBR3	Homo sapiens	ubiquitin protein ligase E3 component n-recognin 3 (putative)	XP_006712333.1
dd_Smed_v6_9986_0	0.181939	0.197753	1.08692	0.225725	1
dd_Smed_v6_3742_0	0.383734	0.40391	1.05258	0.21782	1	DDX58	Homo sapiens	DEAD (Asp-Glu-Ala-Asp) box polypeptide 58	NP_055129.2
dd_Smed_v6_2529_0	0.22723	0.238769	1.05078	0.216814	1	LOC100118626	Nasonia vitripennis	protein enabled	XP_008208049.1
dd_Smed_v6_2295_0	0.142287	0.152638	1.07275	0.213139	1
dd_Smed_v6_4030_0	0.673442	0.705145	1.04708	0.209087	1	TRIADDRAFT	Trichoplax adhaerens	hypothetical protein	XP_002113149.1
dd_Smed_v6_10633_0	0.919523	0.95785	1.04168	0.208619	1	ZNFX1	Homo sapiens	zinc finger NFX1-type containing 1	NP_066363.1
dd_Smed_v6_3037_0	0.275989	0.290961	1.05425	0.208116	1	GART	Homo sapiens	phosphoribosylglycinamide formyltransferase, phosphoribosylglycinamide synthetase, phosphoribosylaminoimidazole synthetase	NP_000810.1
dd_Smed_v6_400_0	0.3081	0.321544	1.04364	0.207303	1	ALDH2	Homo sapiens	aldehyde dehydrogenase 2 family (mitochondrial)	NP_000681.2
dd_Smed_v6_1259_0	0.159442	0.168937	1.05955	0.205992	1	SOD2	Homo sapiens	superoxide dismutase 2, mitochondrial	NP_000627.2
dd_Smed_v6_8834_0	0.171259	0.185167	1.08121	0.203545	1
dd_Smed_v6_4026_0	0.317016	0.332734	1.04958	0.201117	1	Gm5806	Mus musculus	predicted gene 5806	XP_006543330.1
dd_Smed_v6_209_0	2.08296	2.11928	1.01744	0.200145	1	YBX3	Homo sapiens	Y box binding protein 3	NP_003642.3
dd_Smed_v6_11717_0	0.22075	0.234812	1.0637	0.199323	1	KIF15	Homo sapiens	kinesin family member 15	XP_006713328.1
dd_Smed_v6_2861_0	0.166603	0.177521	1.06554	0.197782	1	FMRP	Aplysia californica	fragile X mental retardation protein	NP_001191563.1
dd_Smed_v6_3158_0	0.146062	0.154547	1.05809	0.195152	1	TMEM143	Homo sapiens	transmembrane protein 143	NP_060743.2
dd_Smed_v6_2243_0	0.178687	0.187561	1.04966	0.195043	1
dd_Smed_v6_10681_0	0.310774	0.326511	1.05064	0.193007	1	PTT	Pyrenophora teres f. teres 0-1	hypothetical protein	XP_003305714.1
dd_Smed_v6_12091_0	0.150643	0.162147	1.07636	0.192542	1	TIGD7	Homo sapiens	tigger transposable element derived 7	NP_149985.2
dd_Smed_v6_3490_0	0.373669	0.387474	1.03695	0.191676	1	RUVBL1	Homo sapiens	RuvB-like AAA ATPase 1	NP_003698.1
dd_Smed_v6_1059_0	0.13041	0.138038	1.05849	0.191248	1	RSL24D1	Homo sapiens	ribosomal L24 domain containing 1	NP_057388.1
dd_Smed_v6_1556_0	0.212035	0.222195	1.04792	0.187214	1	VPS4A	Homo sapiens	vacuolar protein sorting 4 homolog A	NP_037377.1
dd_Smed_v6_5859_0	0.177203	0.186438	1.05211	0.185994	1	NRBP2	Homo sapiens	nuclear receptor binding protein 2	NP_848659.2
dd_Smed_v6_2315_0	0.559692	0.576142	1.02939	0.183127	1	CLK4	Homo sapiens	CDC like kinase 4	XP_005266005.1
dd_Smed_v6_2819_0	0.426601	0.449211	1.053	0.181518	1	OGT	Homo sapiens	O-linked N-acetylglucosamine (GlcNAc) transferase	XP_006724777.1
dd_Smed_v6_2478_0	0.255071	0.26707	1.04704	0.18125	1	AGO1	Homo sapiens	argonaute RISC catalytic component 1	NP_036331.1
dd_Smed_v6_3375_0	0.380326	0.39699	1.04382	0.179587	1	APAF1	Homo sapiens	apoptotic peptidase activating factor 1	NP_001151.1
dd_Smed_v6_3327_0	0.151558	0.16039	1.05828	0.17879	1	Trmt6	Mus musculus	tRNA methyltransferase 6	NP_780322.2
dd_Smed_v6_3831_0	0.200676	0.211374	1.05331	0.177661	1	FGFR1OP2	Homo sapiens	FGFR1 oncogene partner 2	NP_001165358.1
dd_Smed_v6_1858_0	0.233894	0.244044	1.0434	0.177513	1	MTHFD1	Homo sapiens	methylenetetrahydrofolate dehydrogenase, cyclohydrolase and formyltetrahydrofolate synthetase 1	NP_005947.3
dd_Smed_v6_17517_0	0.194091	0.204815	1.05525	0.174846	1	Dmoj	Drosophila mojavensis	GI13361 gene product from transcript GI13361-RA	XP_002008205.1
dd_Smed_v6_1822_0	0.529002	0.544921	1.03009	0.173826	1	Dpse	Drosophila pseudoobscura pseudoobscura	GA15714 gene product from transcript GA15714-RA	XP_001355473.2
dd_Smed_v6_63_0	0.405241	0.419256	1.03458	0.17054	1	COTL1	Homo sapiens	coactosin like F-actin binding protein 1	NP_066972.1
dd_Smed_v6_11534_0	0.201413	0.211225	1.04872	0.169885	1	Rhbdf1	Mus musculus	rhomboid family 1 (Drosophila)	NP_034247.2
dd_Smed_v6_7624_0	0.166719	0.176381	1.05795	0.169646	1
dd_Smed_v6_6026_0	0.256099	0.267943	1.04625	0.168399	1	Taz	Mus musculus	tafazzin	NP_852657.1
dd_Smed_v6_4255_0	0.162418	0.170265	1.04832	0.16823	1	Srpk2	Mus musculus	serine/arginine-rich protein specific kinase 2	NP_033300.2
dd_Smed_v6_4866_0	1.10936	1.13593	1.02396	0.168178	1	CDK12	Homo sapiens	cyclin-dependent kinase 12	XP_005257515.1
dd_Smed_v6_6124_0	0.218219	0.227588	1.04293	0.167013	1	LOC100871276	Apis florea	protein cramped-like	XP_003696269.1
dd_Smed_v6_16808_0	0.230044	0.240143	1.0439	0.157502	1	LOC100370084	Saccoglossus kowalevskii	uncharacterized LOC100370084	XP_006822546.1
dd_Smed_v6_1195_0	0.160652	0.168082	1.04625	0.155389	1	SYNGR1	Homo sapiens	synaptogyrin 1	NP_004702.2
dd_Smed_v6_2098_0	0.295724	0.305427	1.03281	0.155024	1	CISD2	Homo sapiens	CDGSH iron sulfur domain 2	NP_001008389.1
dd_Smed_v6_7492_0	0.319025	0.334105	1.04727	0.153009	1	COQ2	Homo sapiens	coenzyme Q2 4-hydroxybenzoate polyprenyltransferase	NP_056512.5
dd_Smed_v6_3771_0	0.137583	0.144365	1.04929	0.152172	1	GMPPB	Homo sapiens	GDP-mannose pyrophosphorylase B	NP_068806.1
dd_Smed_v6_490_0	7.18207	7.26396	1.0114	0.151619	1
dd_Smed_v6_5305_0	0.247245	0.257268	1.04054	0.151362	1	FAF1	Homo sapiens	Fas (TNFRSF6) associated factor 1	NP_008982.1
dd_Smed_v6_3825_1	0.34487	0.359478	1.04236	0.151164	1
dd_Smed_v6_4855_0	0.402579	0.414973	1.03079	0.150646	1	CBX3	Homo sapiens	chromobox 3	NP_009207.2
dd_Smed_v6_6275_0	0.22084	0.228883	1.03642	0.150159	1
dd_Smed_v6_59_0	0.779735	0.797531	1.02282	0.149589	1	CLTC	Homo sapiens	clathrin heavy chain	NP_004850.1
dd_Smed_v6_286_0	0.656577	0.669934	1.02034	0.147684	1	PPM1A	Homo sapiens	protein phosphatase, Mg2 /Mn2 dependent 1A	NP_066283.1
dd_Smed_v6_329_0	0.221804	0.230414	1.03882	0.145651	1	CTSD	Homo sapiens	cathepsin D	NP_001900.1
dd_Smed_v6_7435_0	0.250209	0.260028	1.03924	0.144591	1	ZDHHC3	Homo sapiens	zinc finger, DHHC-type containing 3	NP_057682.1
dd_Smed_v6_5939_0	0.636387	0.652768	1.02574	0.144269	1	HIP1	Homo sapiens	huntingtin interacting protein 1	NP_005329.3
dd_Smed_v6_2473_0	0.199604	0.207014	1.03712	0.141442	1	SCAMP1	Homo sapiens	secretory carrier membrane protein 1	NP_001277158.1
dd_Smed_v6_6251_0	0.34507	0.356694	1.03369	0.139875	1	PCDH1	Homo sapiens	protocadherin 1	NP_001265542.1
dd_Smed_v6_12592_0	0.219995	0.229293	1.04226	0.137539	1	EPB41	Homo sapiens	erythrocyte membrane protein band 4.1	NP_004428.1
dd_Smed_v6_1221_0	0.437056	0.447949	1.02492	0.136037	1	DBNL	Homo sapiens	drebrin like	NP_001014436.1
dd_Smed_v6_922_1	0.165824	0.172032	1.03744	0.134029	1	SLMO2	Homo sapiens	slowmo homolog 2 (Drosophila)	NP_057129.2
dd_Smed_v6_883_0	0.215404	0.227733	1.05723	0.131334	1	CG44250	Drosophila melanogaster	CG44250 gene product from transcript CG44250-RB	NP_001163133.1
dd_Smed_v6_5459_0	0.19934	0.207635	1.04161	0.13075	1	OMA1	Homo sapiens	OMA1 zinc metallopeptidase	NP_660286.1
dd_Smed_v6_2629_0	0.181093	0.187742	1.03672	0.130727	1	SRP72	Homo sapiens	signal recognition particle 72kDa	NP_008878.3
dd_Smed_v6_2242_0	0.32483	0.334276	1.02908	0.130692	1	PPP2R1A	Homo sapiens	protein phosphatase 2, regulatory subunit A, alpha	NP_055040.2
dd_Smed_v6_10954_0	0.165075	0.171648	1.03982	0.129579	1
dd_Smed_v6_4386_0	0.194099	0.200644	1.03372	0.127779	1	PRPF38A	Homo sapiens	pre-mRNA processing factor 38A	NP_116253.2
dd_Smed_v6_3826_0	0.289474	0.297539	1.02786	0.126587	1	SUGT1	Homo sapiens	SGT1 homolog, MIS12 kinetochore complex assembly cochaperone	NP_006695.1
dd_Smed_v6_1980_0	0.330865	0.339237	1.0253	0.126528	1	COPA	Homo sapiens	coatomer protein complex, subunit alpha	NP_004362.2
dd_Smed_v6_3764_0	0.15557	0.161119	1.03567	0.122157	1	EIF2S2	Homo sapiens	eukaryotic translation initiation factor 2 subunit beta	NP_003899.2
dd_Smed_v6_4111_0	0.170313	0.17586	1.03257	0.12168	1	LOC100368194	Saccoglossus kowalevskii	coiled-coil-helix-coiled-coil-helix domain-containing protein 3, mitochondrial-like	XP_002737882.1
dd_Smed_v6_3026_1	0.250825	0.258652	1.03121	0.118223	1	GRIK2	Homo sapiens	glutamate ionotropic receptor kainate type subunit 2	NP_001159719.1
dd_Smed_v6_4795_0	0.195963	0.202384	1.03277	0.117951	1	NFX1	Homo sapiens	nuclear transcription factor, X-box binding 1	XP_005251530.1
dd_Smed_v6_6525_0	1.05238	1.0749	1.0214	0.116372	1	MAP4K5	Homo sapiens	mitogen-activated protein kinase kinase kinase kinase 5	XP_006720077.1
dd_Smed_v6_897_0	1.35608	1.37258	1.01217	0.114477	1	SDHA	Homo sapiens	succinate dehydrogenase complex flavoprotein subunit A	NP_004159.2
dd_Smed_v6_10171_0	0.320119	0.32995	1.03071	0.113853	1	Gabrg3	Mus musculus	gamma-aminobutyric acid (GABA) A receptor, subunit gamma 3	NP_032100.2
dd_Smed_v6_1377_0	0.250373	0.257583	1.0288	0.11285	1	ACAT1	Homo sapiens	acetyl-CoA acetyltransferase 1	NP_000010.1
dd_Smed_v6_3360_0	0.409106	0.418474	1.0229	0.112356	1
dd_Smed_v6_199_0	0.178123	0.183778	1.03174	0.110514	1
dd_Smed_v6_1642_0	0.176694	0.181592	1.02772	0.110423	1	EIF3F	Homo sapiens	eukaryotic translation initiation factor 3 subunit F	NP_003745.1
dd_Smed_v6_7719_0	0.216626	0.222645	1.02778	0.109247	1	Ep300	Mus musculus	E1A binding protein p300	NP_808489.4
dd_Smed_v6_2030_0	0.817267	0.833708	1.02012	0.109015	1	LOC100822172	Brachypodium distachyon	mitogen-activated protein kinase kinase kinase ANP1-like	XP_003578068.1
dd_Smed_v6_5873_0	0.16962	0.175379	1.03396	0.108803	1	PITRM1	Homo sapiens	pitrilysin metallopeptidase 1	NP_055704.2
dd_Smed_v6_8618_0	0.255145	0.261672	1.02558	0.107854	1	SRCAP	Homo sapiens	Snf2-related CREBBP activator protein	NP_006653.2
dd_Smed_v6_6515_0	0.20568	0.211464	1.02812	0.106272	1	LOC102354675	Latimeria chalumnae	golgin subfamily A member 2-like	XP_005992183.1
dd_Smed_v6_4949_0	0.507369	0.518697	1.02233	0.10621	1
dd_Smed_v6_3757_0	0.206736	0.212522	1.02799	0.103508	1	BTRC	Homo sapiens	beta-transducin repeat containing E3 ubiquitin protein ligase	NP_001243785.1
dd_Smed_v6_2912_0	3.24504	3.28172	1.0113	0.0989414	1	MYH11	Monodelphis domestica	myosin, heavy chain 11, smooth muscle	XP_001365978.1
dd_Smed_v6_568_0	0.629276	0.641343	1.01918	0.0972396	1	A2ML1	Homo sapiens	alpha-2-macroglobulin like 1	NP_001269353.1
dd_Smed_v6_805_0	0.23737	0.242966	1.02357	0.0970149	1	DNAJA3	Homo sapiens	DnaJ heat shock protein family (Hsp40) member A3	NP_005138.3
dd_Smed_v6_2926_0	1.94323	1.96686	1.01216	0.0934874	1	LENG8	Homo sapiens	leukocyte receptor cluster (LRC) member 8	NP_443157.1
dd_Smed_v6_3301_0	0.208859	0.213597	1.02268	0.0917508	1	DNAJC25	Homo sapiens	DnaJ heat shock protein family (Hsp40) member C25	NP_001015882.2
dd_Smed_v6_11294_0	0.168255	0.173194	1.02935	0.0914038	1
dd_Smed_v6_884_0	1.55072	1.56928	1.01197	0.0879542	1	LOC101164884	Oryzias latipes	interferon-induced GTP-binding protein Mx-like	XP_004068905.1
dd_Smed_v6_15045_0	0.195572	0.201019	1.02785	0.0873198	1
dd_Smed_v6_1781_0	0.159424	0.163134	1.02327	0.0858645	1	FLII	Homo sapiens	FLII, actin remodeling protein	NP_002009.1
dd_Smed_v6_7726_0	0.1597	0.163904	1.02632	0.082655	1	Traf2	Mus musculus	TNF receptor-associated factor 2	XP_006497913.1
dd_Smed_v6_13470_0	0.44053	0.449104	1.01946	0.0824809	1
dd_Smed_v6_836_0	0.287002	0.291481	1.01561	0.0818486	1	SEC13	Homo sapiens	SEC13 homolog, nuclear pore and COPII coat complex component	NP_899195.1
dd_Smed_v6_656_0	0.270322	0.275151	1.01786	0.0810476	1	MDH2	Homo sapiens	malate dehydrogenase 2	NP_005909.2
dd_Smed_v6_7488_0	0.212954	0.217258	1.02021	0.07901	1	UCHL3	Homo sapiens	ubiquitin C-terminal hydrolase L3	NP_005993.1
dd_Smed_v6_947_0	0.320086	0.325276	1.01621	0.077536	1	CNBP	Homo sapiens	CCHC-type zinc finger nucleic acid binding protein	NP_001120664.1
dd_Smed_v6_5685_0	0.249718	0.254275	1.01825	0.0723369	1	CUX1	Homo sapiens	cut like homeobox 1	NP_852477.1
dd_Smed_v6_1432_0	1.58395	1.60539	1.01353	0.072192	1	ANK3	Homo sapiens	ankyrin 3, node of Ranvier (ankyrin G)	NP_001191332.1
dd_Smed_v6_3935_0	0.107996	0.110817	1.02612	0.0710846	1
dd_Smed_v6_2594_0	0.246836	0.25349	1.02695	0.0663226	1	EMC10	Homo sapiens	ER membrane protein complex subunit 10	NP_996261.1
dd_Smed_v6_627_0	0.39478	0.399457	1.01185	0.0648505	1	LOC100636293	Amphimedon queenslandica	adenosine kinase-like	XP_003388939.1
dd_Smed_v6_3864_0	0.131266	0.133845	1.01965	0.0647146	1	CAPN5	Homo sapiens	calpain 5	NP_004046.2
dd_Smed_v6_1121_0	0.140101	0.142635	1.01809	0.0644612	1	Rpl7	Mus musculus	ribosomal protein L7	NP_035421.2
dd_Smed_v6_5548_0	0.388612	0.395393	1.01745	0.0642171	1
dd_Smed_v6_11507_0	0.189805	0.193875	1.02144	0.0631165	1	LOC100649348	Bombus terrestris	nucleolar pre-ribosomal-associated protein 1-like	XP_003399988.1
dd_Smed_v6_4906_0	0.138147	0.140772	1.019	0.061163	1	PDIA4	Homo sapiens	protein disulfide isomerase family A member 4	XP_006716248.1
dd_Smed_v6_6580_0	0.252056	0.255807	1.01488	0.059303	1
dd_Smed_v6_10693_0	0.513364	0.52061	1.01412	0.0586064	1	LOC100372234	Saccoglossus kowalevskii	phosphatidylinositol 4-phosphate 5-kinase type-1 gamma-like	XP_006821157.1
dd_Smed_v6_3475_0	0.322383	0.325959	1.01109	0.0573692	1	SPG7	Homo sapiens	SPG7, paraplegin matrix AAA peptidase subunit	NP_003110.1
dd_Smed_v6_3468_0	0.165863	0.168495	1.01587	0.0570145	1	ATAD1	Homo sapiens	ATPase family, AAA domain containing 1	NP_116199.2
dd_Smed_v6_5375_0	0.227433	0.230646	1.01413	0.0558562	1	CTPS1	Homo sapiens	CTP synthase 1	NP_001896.2
dd_Smed_v6_526_0	0.716554	0.722405	1.00817	0.0555797	1	AHCY	Homo sapiens	adenosylhomocysteinase	NP_000678.1
dd_Smed_v6_13633_0	0.6305	0.636055	1.00881	0.0545988	1
dd_Smed_v6_6055_0	0.132389	0.13637	1.03007	0.053797	1	ATRAID	Homo sapiens	all-trans retinoic acid-induced differentiation factor	NP_057169.2
dd_Smed_v6_3210_0	0.213143	0.215885	1.01286	0.052503	1	SYP	Homo sapiens	synaptophysin	NP_003170.1
dd_Smed_v6_1657_0	0.192676	0.195147	1.01282	0.0505016	1	SSR1	Homo sapiens	signal sequence receptor subunit 1	NP_003135.2
dd_Smed_v6_2682_0	0.166565	0.16912	1.01534	0.0486141	1	MCM6	Homo sapiens	minichromosome maintenance complex component 6	NP_005906.2
dd_Smed_v6_1760_1	0.944754	0.951639	1.00729	0.0466113	1	Pmar	Perkinsus marinus ATCC 50983	retrovirus polyprotein, putative	XP_002788040.1
dd_Smed_v6_590_0	0.505451	0.508908	1.00684	0.0441935	1	KPNA4	Homo sapiens	karyopherin subunit alpha 4	NP_002259.1
dd_Smed_v6_2547_0	0.214342	0.216798	1.01146	0.0428332	1	RUVBL2	Homo sapiens	RuvB-like AAA ATPase 2	NP_006657.1
dd_Smed_v6_5582_0	0.310995	0.313876	1.00926	0.0424394	1	RYR2	Homo sapiens	ryanodine receptor 2	NP_001026.2
dd_Smed_v6_3443_0	0.19352	0.195654	1.01103	0.0412583	1	ZNF878	Homo sapiens	zinc finger protein 878	NP_001073873.2
dd_Smed_v6_948_0	0.376631	0.379462	1.00752	0.039994	1	DDOST	Homo sapiens	dolichyl-diphosphooligosaccharide--protein glycosyltransferase non-catalytic subunit	NP_005207.2
dd_Smed_v6_3926_0	0.159215	0.161355	1.01344	0.0394435	1	WDR82	Homo sapiens	WD repeat domain 82	NP_079498.2
dd_Smed_v6_495_0	0.710539	0.714654	1.00579	0.0388648	1	QDPR	Homo sapiens	quinoid dihydropteridine reductase	NP_000311.2
dd_Smed_v6_5515_0	0.301212	0.303231	1.0067	0.033149	1	POLRMT	Homo sapiens	polymerase (RNA) mitochondrial	NP_005026.3
dd_Smed_v6_915_0	0.41286	0.41539	1.00613	0.0305688	1	Grn	Mus musculus	granulin	NP_032201.2
dd_Smed_v6_1931_0	0.324064	0.326179	1.00653	0.0305025	1
dd_Smed_v6_2660_0	0.865189	0.870538	1.00618	0.0302775	1	DOCK9	Alligator sinensis	dedicator of cytokinesis 9	XP_006027472.1
dd_Smed_v6_9475_0	0.463677	0.466308	1.00567	0.0288809	1	DAPK1	Homo sapiens	death-associated protein kinase 1	XP_006717051.1
dd_Smed_v6_15999_0	0.257024	0.259824	1.01089	0.0283131	1
dd_Smed_v6_5011_0	0.33584	0.337661	1.00542	0.027357	1	PAPD7	Homo sapiens	PAP associated domain containing 7	XP_005248291.1
dd_Smed_v6_4552_0	0.233493	0.235095	1.00686	0.0251715	1	Cbr-npp-11	Caenorhabditis briggsae	C. briggsae CBR-NPP-11 protein	XP_002646303.1
dd_Smed_v6_6167_0	0.24944	0.251067	1.00652	0.0248458	1	GNAS	Homo sapiens	GNAS complex locus	NP_001070957.1
dd_Smed_v6_997_0	0.237122	0.238271	1.00484	0.0216934	1	NAP1L1	Homo sapiens	nucleosome assembly protein 1-like 1	NP_004528.1
dd_Smed_v6_2498_0	0.200083	0.201002	1.00459	0.0174897	1	CELE	Caenorhabditis elegans	Protein Y41E3.7	NP_001041027.1
dd_Smed_v6_2720_0	0.178851	0.179574	1.00404	0.0148005	1	POLR2K	Homo sapiens	polymerase (RNA) II subunit K	NP_005025.1
dd_Smed_v6_4413_0	0.164803	0.165239	1.00264	0.00918361	1	BRD7	Homo sapiens	bromodomain containing 7	NP_037395.2
dd_Smed_v6_16428_0	0.293754	0.294271	1.00176	0.00819259	1	SLC38A11	Homo sapiens	solute carrier family 38 member 11	XP_005246407.1
dd_Smed_v6_8533_0	0.193876	0.194326	1.00232	0.0068568	1	NISCH	Homo sapiens	nischarin	NP_001263223.1
dd_Smed_v6_9501_0	0.262985	0.263273	1.00109	0.00409426	1	usp3	Strongylocentrotus purpuratus	ubiquitin specific peptidase 3	XP_781718.3
dd_Smed_v6_1510_0	0.397678	0.397841	1.00041	0.00221499	1	LRP4	Homo sapiens	low density lipoprotein receptor-related protein 4	NP_002325.2
dd_Smed_v6_3348_1	0.169911	0.170034	1.00072	0.00211601	1	MCEE	Homo sapiens	methylmalonyl-CoA epimerase	NP_115990.3
dd_Smed_v6_6341_0	0.198068	0.198068	1	0	1	RERE	Homo sapiens	arginine-glutamic acid dipeptide (RE) repeats	XP_005263522.1
dd_Smed_v6_10373_0	0.210736	0.210518	-1.00104	-0.00264241	1	Fggy	Mus musculus	FGGY carbohydrate kinase domain containing	XP_006503526.1
dd_Smed_v6_732_0	0.147126	0.146928	-1.00135	-0.00481816	1	CG9065	Drosophila melanogaster	CG9065 gene product from transcript CG9065-RA	NP_572998.1
dd_Smed_v6_4377_0	0.639446	0.638544	-1.00141	-0.0075395	1	4932438A13Rik	Mus musculus	RIKEN cDNA 4932438A13 gene	XP_006535520.1
dd_Smed_v6_7207_0	0.196733	0.196164	-1.0029	-0.00981879	1	CG1607	Drosophila melanogaster	CG1607 gene product from transcript CG1607-RA	NP_651865.1
dd_Smed_v6_9264_0	0.782988	0.781145	-1.00236	-0.0102065	1
dd_Smed_v6_9572_0	0.193437	0.192869	-1.00295	-0.0111962	1
dd_Smed_v6_1435_0	0.153436	0.152881	-1.00364	-0.0116069	1
dd_Smed_v6_2780_0	0.289613	0.288311	-1.00451	-0.0132631	1	GTPBP1	Homo sapiens	GTP binding protein 1	NP_004277.2
dd_Smed_v6_4706_1	0.257703	0.256653	-1.00409	-0.0135492	1	KAT5	Homo sapiens	lysine acetyltransferase 5	NP_001193762.1
dd_Smed_v6_1204_0	0.211013	0.21019	-1.00392	-0.014559	1	Eif4ebp2	Mus musculus	eukaryotic translation initiation factor 4E binding protein 2	NP_034254.1
dd_Smed_v6_2962_0	0.130114	0.129494	-1.00479	-0.0162076	1	Aats-asp	Drosophila melanogaster	Aspartyl-tRNA synthetase	NP_476609.1
dd_Smed_v6_2033_0	0.232136	0.230917	-1.00528	-0.0224245	1
dd_Smed_v6_11324_0	0.404336	0.40217	-1.00539	-0.0233312	1	ASNSD1	Homo sapiens	asparagine synthetase domain containing 1	NP_061921.1
dd_Smed_v6_2571_0	0.166316	0.16511	-1.00731	-0.0255846	1
dd_Smed_v6_4361_0	0.20355	0.202074	-1.0073	-0.0261327	1	DHX58	Homo sapiens	DEXH-box helicase 58	NP_077024.2
dd_Smed_v6_1186_0	0.340785	0.33885	-1.00571	-0.0283796	1	NDUFB9	Homo sapiens	NADH:ubiquinone oxidoreductase subunit B9	NP_004996.1
dd_Smed_v6_555_0	0.235506	0.233315	-1.00939	-0.0288092	1	LOC101236632	Hydra vulgaris	src substrate cortactin-like	XP_004205916.1
dd_Smed_v6_6447_0	0.152175	0.150678	-1.00993	-0.0302589	1	MLH1	Homo sapiens	mutL homolog 1	NP_000240.1
dd_Smed_v6_885_0	0.17743	0.175823	-1.00914	-0.032241	1	GYG2	Homo sapiens	glycogenin 2	NP_001171632.1
dd_Smed_v6_2191_0	1.26485	1.25968	-1.0041	-0.0325548	1
dd_Smed_v6_5483_0	1.48063	1.47288	-1.00526	-0.0331655	1	TRIO	Homo sapiens	trio Rho guanine nucleotide exchange factor	NP_009049.2
dd_Smed_v6_1152_2	1.03119	1.02629	-1.00477	-0.0359012	1
dd_Smed_v6_1474_0	0.300383	0.297935	-1.00821	-0.0369147	1	FKBP8	Homo sapiens	FK506 binding protein 8, 38kDa	XP_005259899.1
dd_Smed_v6_4017_0	0.231571	0.229331	-1.00977	-0.0371707	1	CYB561	Homo sapiens	cytochrome b561	NP_001906.3
dd_Smed_v6_3282_1	0.123707	0.122151	-1.01274	-0.0442065	1	eIF-4B	Drosophila melanogaster	Eukaryotic initiation factor 4B	NP_001015319.1
dd_Smed_v6_7781_0	0.485719	0.480052	-1.01181	-0.0447177	1	PRDX2	Homo sapiens	peroxiredoxin 2	NP_005800.3
dd_Smed_v6_6631_0	0.260582	0.257719	-1.01111	-0.0454416	1	EPC1	Homo sapiens	enhancer of polycomb homolog 1 (Drosophila)	NP_001258933.1
dd_Smed_v6_3739_0	0.195025	0.192064	-1.01541	-0.046937	1	GK	Homo sapiens	glycerol kinase	NP_976325.1
dd_Smed_v6_6390_0	0.477186	0.471638	-1.01176	-0.0479391	1	Ttll5	Mus musculus	tubulin tyrosine ligase-like family, member 5	XP_006516071.1
dd_Smed_v6_1613_0	0.39327	0.389499	-1.00968	-0.0491543	1	EPB41L3	Homo sapiens	erythrocyte membrane protein band 4.1 like 3	NP_001268464.1
dd_Smed_v6_4474_0	0.165991	0.16363	-1.01443	-0.0497441	1
dd_Smed_v6_1767_0	0.22947	0.226853	-1.01154	-0.0516513	1	BAK1	Homo sapiens	BCL2 antagonist/killer 1	NP_001179.1
dd_Smed_v6_7535_0	0.243057	0.239533	-1.01471	-0.0518561	1	HSF1	Homo sapiens	heat shock transcription factor 1	XP_005272374.1
dd_Smed_v6_3186_0	0.251087	0.248133	-1.01191	-0.0518562	1	FTSJ3	Homo sapiens	FtsJ homolog 3	NP_060117.3
dd_Smed_v6_1335_0	0.246606	0.243572	-1.01246	-0.0528079	1	CHMP2A	Homo sapiens	charged multivesicular body protein 2A	NP_055268.1
dd_Smed_v6_4493_0	0.209716	0.206753	-1.01433	-0.0543271	1	GNAL	Homo sapiens	G protein subunit alpha L	NP_001135811.1
dd_Smed_v6_5947_0	0.241964	0.238572	-1.01422	-0.0555402	1	OSBPL9	Homo sapiens	oxysterol binding protein like 9	NP_683706.3
dd_Smed_v6_18000_0	0.461335	0.45345	-1.01739	-0.0566351	1	ACA1	Acanthamoeba castellanii str. Neff	Reverse transcriptase	XP_004339617.1
dd_Smed_v6_1045_0	0.157567	0.155152	-1.01556	-0.0581545	1	LOC100641200	Amphimedon queenslandica	elongation factor 1-beta-like	XP_003383127.1
dd_Smed_v6_5482_0	0.288569	0.284648	-1.01377	-0.0590348	1	SRGAP3	Homo sapiens	SLIT-ROBO Rho GTPase activating protein 3	XP_005265679.1
dd_Smed_v6_9427_0	0.936508	0.926235	-1.01109	-0.0668328	1
dd_Smed_v6_12996_0	0.191256	0.187945	-1.01762	-0.0673682	1	beta-Spec	Drosophila melanogaster	beta Spectrin	NP_523388.1
dd_Smed_v6_876_0	0.96482	0.95435	-1.01097	-0.0684245	1	TLN1	Homo sapiens	talin 1	NP_006280.3
dd_Smed_v6_11194_0	0.469264	0.461063	-1.01779	-0.0688408	1
dd_Smed_v6_2451_0	0.405136	0.396904	-1.02074	-0.0702991	1	IscW	Ixodes scapularis	hypothetical protein	XP_002414877.1
dd_Smed_v6_7989_0	0.28464	0.27878	-1.02102	-0.071319	1
dd_Smed_v6_12660_2	0.434562	0.426684	-1.01846	-0.0722874	1	TIGD1	Homo sapiens	tigger transposable element derived 1	NP_663748.1
dd_Smed_v6_9138_0	0.400416	0.39289	-1.01915	-0.0730209	1	FAM58A	Homo sapiens	family with sequence similarity 58 member A	NP_689487.2
dd_Smed_v6_7152_0	0.283358	0.27796	-1.01942	-0.0765317	1	Pias2	Mus musculus	protein inhibitor of activated STAT 2	NP_001157640.1
dd_Smed_v6_3334_0	0.327492	0.32238	-1.01586	-0.0775393	1	KDM5D	Homo sapiens	lysine (K)-specific demethylase 5D	NP_004644.2
dd_Smed_v6_4236_0	0.193667	0.189501	-1.02199	-0.0780514	1	UBR2	Homo sapiens	ubiquitin protein ligase E3 component n-recognin 2	XP_005249022.1
dd_Smed_v6_5185_0	0.171381	0.167459	-1.02342	-0.0798632	1	UPF1	Homo sapiens	UPF1, RNA helicase and ATPase	NP_002902.2
dd_Smed_v6_6584_0	0.329844	0.323374	-1.02001	-0.0802709	1	INPP5F	Homo sapiens	inositol polyphosphate-5-phosphatase F	XP_006717783.1
dd_Smed_v6_569_0	0.392055	0.385814	-1.01618	-0.0823303	1
dd_Smed_v6_927_1	1.05636	1.04495	-1.01092	-0.0826622	1	FLOT2	Homo sapiens	flotillin 2	NP_004466.2
dd_Smed_v6_4025_0	0.222386	0.217137	-1.02418	-0.0885076	1	RNF31	Homo sapiens	ring finger protein 31	NP_060469.4
dd_Smed_v6_7562_0	0.294761	0.288526	-1.02161	-0.0903902	1	gria1	Xenopus tropicalis	glutamate receptor, ionotropic, AMPA 1	XP_002941535.1
dd_Smed_v6_1167_0	0.229462	0.224336	-1.02285	-0.0906936	1	CASP7	Homo sapiens	caspase 7	NP_001253987.1
dd_Smed_v6_1420_0	0.118916	0.115243	-1.03187	-0.092631	1	LARP6	Homo sapiens	La ribonucleoprotein domain family member 6	NP_060827.2
dd_Smed_v6_4016_0	0.21892	0.213587	-1.02497	-0.0933852	1	DNAJC3	Homo sapiens	DnaJ (Hsp40) homolog, subfamily C, member 3	NP_006251.1
dd_Smed_v6_8975_0	0.183526	0.178436	-1.02853	-0.0936944	1	PB000727.03.0	Plasmodium berghei ANKA	serine/threonine protein kinase	XP_676213.1
dd_Smed_v6_12249_0	0.166518	0.161901	-1.02851	-0.0939255	1	HINFP	Homo sapiens	histone H4 transcription factor	NP_945322.1
dd_Smed_v6_11492_0	0.207901	0.201319	-1.03269	-0.0973134	1	JADE1	Homo sapiens	jade family PHD finger 1	XP_005263286.1
dd_Smed_v6_1661_0	0.16759	0.162499	-1.03133	-0.103351	1	MGST3	Homo sapiens	microsomal glutathione S-transferase 3	NP_004519.1
dd_Smed_v6_3928_0	0.381223	0.370758	-1.02823	-0.10472	1	FMNL2	Homo sapiens	formin like 2	XP_005246322.1
dd_Smed_v6_4827_0	0.204372	0.197214	-1.03629	-0.105164	1	TRAF6	Homo sapiens	TNF receptor associated factor 6	NP_004611.1
dd_Smed_v6_828_0	0.35795	0.349994	-1.02273	-0.105913	1	Dgri	Drosophila grimshawi	GH15532 gene product from transcript GH15532-RA	XP_001983527.1
dd_Smed_v6_4638_0	0.210966	0.205698	-1.02561	-0.106167	1	LOC101929327	Homo sapiens	tudor domain-containing protein 12-like	XP_006723595.1
dd_Smed_v6_1869_0	0.422352	0.411128	-1.0273	-0.106832	1	OGDHL	Homo sapiens	oxoglutarate dehydrogenase-like	NP_060715.2
dd_Smed_v6_1255_0	0.207469	0.201381	-1.03023	-0.107222	1	ATP6V1C1	Homo sapiens	ATPase H transporting V1 subunit C1	NP_001686.1
dd_Smed_v6_1451_0	0.264294	0.258	-1.0244	-0.108757	1
dd_Smed_v6_4931_0	0.337821	0.329769	-1.02442	-0.109462	1	OSBP2	Homo sapiens	oxysterol binding protein 2	NP_001269671.1
dd_Smed_v6_12806_0	0.309319	0.301867	-1.02469	-0.113366	1	MSH4	Homo sapiens	mutS homolog 4	NP_002431.2
dd_Smed_v6_5180_0	0.188952	0.182996	-1.03255	-0.114037	1	CUL2	Homo sapiens	cullin 2	NP_003582.2
dd_Smed_v6_3422_0	0.219218	0.212921	-1.02957	-0.114422	1	Cp1	Drosophila melanogaster	Cysteine proteinase-1	NP_725347.1
dd_Smed_v6_5944_0	1.18785	1.16659	-1.01823	-0.116315	1	DMXL1	Homo sapiens	Dmx like 1	NP_005500.4
dd_Smed_v6_5341_0	0.270926	0.262531	-1.03198	-0.116935	1	HTR1A	Homo sapiens	5-hydroxytryptamine receptor 1A	NP_000515.2
dd_Smed_v6_3286_0	0.700099	0.682166	-1.02629	-0.117092	1	MAP3K2	Homo sapiens	mitogen-activated protein kinase kinase kinase 2	NP_006600.3
dd_Smed_v6_1814_0	0.177222	0.17166	-1.0324	-0.117425	1	CYFIP2	Homo sapiens	cytoplasmic FMR1 interacting protein 2	NP_055191.2
dd_Smed_v6_12956_0	0.169234	0.163865	-1.03276	-0.119687	1	RPIA	Homo sapiens	ribose 5-phosphate isomerase A	NP_653164.2
dd_Smed_v6_3491_0	0.268723	0.26173	-1.02672	-0.119937	1	YTHDC1	Homo sapiens	YTH domain containing 1	NP_001026902.1
dd_Smed_v6_406_0	0.387909	0.377581	-1.02735	-0.124263	1
dd_Smed_v6_6056_0	0.275272	0.265073	-1.03847	-0.128656	1	ACAD9	Homo sapiens	acyl-CoA dehydrogenase family member 9	NP_054768.2
dd_Smed_v6_7379_0	0.614393	0.593555	-1.03511	-0.130398	1	AaeL	Aedes aegypti	AAEL014668-PA	XP_001649301.1
dd_Smed_v6_4321_0	0.632999	0.616561	-1.02666	-0.13225	1	IMPDH1	Homo sapiens	IMP (inosine 5'-monophosphate) dehydrogenase 1	XP_006716036.1
dd_Smed_v6_2241_0	0.301223	0.291523	-1.03327	-0.1345	1	Rab14	Mus musculus	RAB14, member RAS oncogene family	NP_080973.1
dd_Smed_v6_492_0	0.456599	0.446195	-1.02332	-0.135237	1	FAM213B	Homo sapiens	family with sequence similarity 213 member B	NP_689584.2
dd_Smed_v6_2411_0	0.267026	0.258475	-1.03308	-0.13769	1	DDX3X	Homo sapiens	DEAD (Asp-Glu-Ala-Asp) box helicase 3, X-linked	NP_001347.3
dd_Smed_v6_2271_0	0.21455	0.206863	-1.03716	-0.142387	1	SNX32	Homo sapiens	sorting nexin 32	NP_689973.2
dd_Smed_v6_7908_0	0.169563	0.161237	-1.05164	-0.145358	1	SLC30A6	Homo sapiens	solute carrier family 30 member 6	NP_001180444.1
dd_Smed_v6_2749_0	0.155484	0.148311	-1.04836	-0.145688	1
dd_Smed_v6_5576_0	0.32913	0.295032	-1.11558	-0.146357	1	CG31221	Drosophila melanogaster	CG31221 gene product from transcript CG31221-RA	NP_732424.1
dd_Smed_v6_6117_0	0.469827	0.456288	-1.02967	-0.147183	1	dopey1	Poecilia formosa	dopey family member 1	XP_007565504.1
dd_Smed_v6_9156_0	0.175679	0.168617	-1.04189	-0.150174	1
dd_Smed_v6_2312_0	0.167359	0.160863	-1.04038	-0.151343	1	Shmt1	Mus musculus	serine hydroxymethyltransferase 1 (soluble)	NP_033197.2
dd_Smed_v6_768_0	0.183127	0.175425	-1.04391	-0.151948	1	Ptprf	Mus musculus	protein tyrosine phosphatase, receptor type, F	XP_006502939.1
dd_Smed_v6_5020_0	0.201871	0.192676	-1.04772	-0.153731	1	CASD1	Homo sapiens	CAS1 domain containing 1	NP_075051.4
dd_Smed_v6_2726_0	0.222805	0.214189	-1.04022	-0.157015	1	AGOS	Ashbya gossypii ATCC 10895	AAL139Cp	NP_982403.1
dd_Smed_v6_7175_0	0.366742	0.353556	-1.03729	-0.158854	1	LOC101162175	Oryzias latipes	piggyBac transposable element-derived protein 3-like	XP_004083158.1
dd_Smed_v6_4610_1	0.388875	0.373191	-1.04203	-0.160249	1
dd_Smed_v6_10553_0	0.140325	0.134133	-1.04616	-0.160707	1
dd_Smed_v6_489_0	0.554017	0.539703	-1.02652	-0.161194	1	TAOK2	Homo sapiens	TAO kinase 2	NP_004774.1
dd_Smed_v6_1805_0	0.341286	0.330637	-1.03221	-0.1613	1
dd_Smed_v6_1766_0	0.22881	0.219163	-1.04402	-0.162667	1	UBE2M	Homo sapiens	ubiquitin conjugating enzyme E2 M	NP_003960.1
dd_Smed_v6_6449_0	1.17392	1.14261	-1.0274	-0.163115	1	KLC2	Homo sapiens	kinesin light chain 2	XP_005274241.1
dd_Smed_v6_9048_0	0.172168	0.163521	-1.05288	-0.163599	1	DISP1	Homo sapiens	dispatched homolog 1 (Drosophila)	XP_005273393.1
dd_Smed_v6_4488_0	0.160799	0.153745	-1.04588	-0.163709	1
dd_Smed_v6_4831_0	0.226724	0.215215	-1.05348	-0.164788	1
dd_Smed_v6_7877_0	0.232472	0.221996	-1.04719	-0.167237	1	ONECUT1	Homo sapiens	one cut homeobox 1	NP_004489.1
[truncated: 1,780 more rows]

## Sheet: Cl 1.0
	mean.read.count.in.complement.to.Cl.1.0	mean.read.count.in.Cl.1.0	fc	z	lfdr	symbol	species	description	primaryIdentifier
dd_Smed_v6_1440_0	1.6944	11.9706	7.06483	8.65376	1.5073e-06
dd_Smed_v6_3862_0	0.873028	4.14983	4.75337	7.16293	0.000567117	7B2	Drosophila melanogaster	CG1168 gene product from transcript CG1168-RB	NP_620471.3
dd_Smed_v6_6859_0	2.44232	7.33068	3.00153	7.07688	0.000767497	Ston2	Mus musculus	stonin 2	XP_006515444.1
dd_Smed_v6_10835_0	2.67965	9.17448	3.42376	6.2952	0.0093604	AaeL	Aedes aegypti	AAEL011565-PA	XP_001661747.1
dd_Smed_v6_1566_0	0.498917	2.6081	5.22753	6.26977	0.0101677	PCSK2	Homo sapiens	proprotein convertase subtilisin/kexin type 2	NP_002585.2
dd_Smed_v6_4222_0	1.46928	4.12611	2.80826	6.01227	0.0204899	SYT1	Homo sapiens	synaptotagmin 1	NP_005630.1
dd_Smed_v6_3093_0	0.578086	2.95305	5.10832	5.52286	0.0665566	LOC102541208	Vicugna pacos	probable peptidyl-alpha-hydroxyglycine alpha-amidating lyase F21F3.1	XP_006219929.1
dd_Smed_v6_12112_0	0.0615136	1.37759	22.395	5.08751	0.157437	LOC100367603	Saccoglossus kowalevskii	guanine nucleotide-binding protein G(i) subunit alpha-like	XP_002730529.1
dd_Smed_v6_3795_0	0.891753	3.88917	4.36127	4.80354	0.25305
dd_Smed_v6_7108_0	0.573702	2.03752	3.55153	4.75534	0.272749	KIF1A	Homo sapiens	kinesin family member 1A	NP_004312.2
dd_Smed_v6_6730_0	0.9511	2.59927	2.73291	4.72842	0.283751	SYT1	Homo sapiens	synaptotagmin 1	NP_005630.1
dd_Smed_v6_2646_0	0.383718	1.55325	4.0479	4.71118	0.290799	LOC100161384	Acyrthosiphon pisum	peptidylglycine alpha-hydroxylating monooxygenase	NP_001280352.1
dd_Smed_v6_5761_0	0.138086	1.54601	11.196	4.69485	0.297471
dd_Smed_v6_17348_0	0.146149	4.83616	33.0907	4.60914	0.336103	PKD2	Homo sapiens	polycystin 2, transient receptor potential cation channel	NP_000288.1
dd_Smed_v6_8058_0	0.125369	1.04653	8.34754	4.57903	0.349857	LOC100870093	Apis florea	neuronal acetylcholine receptor subunit alpha-7	XP_003691111.1
dd_Smed_v6_5361_0	1.31022	3.18417	2.43026	4.48668	0.394753
dd_Smed_v6_2638_0	0.398075	1.60733	4.03777	4.39115	0.443353	fth1-b	Xenopus laevis	ferritin, heavy polypeptide 1	NP_001079580.1
dd_Smed_v6_2985_0	0.397767	1.39191	3.4993	4.37339	0.45286	LOC100375894	Saccoglossus kowalevskii	neural proliferation differentiation and control protein 1-like	XP_006824980.1
dd_Smed_v6_591_0	1.25246	2.78711	2.22531	4.16694	0.56621	Aldoa	Mus musculus	aldolase A, fructose-bisphosphate	NP_031464.1
dd_Smed_v6_11968_0	0.668724	4.26492	6.3777	4.13828	0.582351	CHAT	Eptesicus fuscus	choline O-acetyltransferase	XP_008147308.1
dd_Smed_v6_9493_0	0.0771937	1.25799	16.2965	4.00454	0.658882	Dper	Drosophila persimilis	GL18807 gene product from transcript GL18807-RA	XP_002014706.1
dd_Smed_v6_5311_0	0.341163	1.15863	3.39611	3.99511	0.664251	CG42450	Drosophila melanogaster	CG42450 gene product from transcript CG42450-RB	NP_573328.2
dd_Smed_v6_4389_0	0.279627	1.70237	6.088	3.9772	0.674459	SLC12A5	Homo sapiens	solute carrier family 12 (potassium/chloride transporter), member 5	NP_001128243.1
dd_Smed_v6_655_0	1.84785	4.94894	2.67821	3.95741	0.685733
dd_Smed_v6_1684_0	2.12374	3.98011	1.8741	3.77569	0.787369	beta-Spec	Drosophila melanogaster	beta Spectrin	NP_523388.1
dd_Smed_v6_3059_0	0.191384	0.728494	3.80645	3.74599	0.803735	CPE	Homo sapiens	carboxypeptidase E	NP_001864.1
dd_Smed_v6_3257_0	1.74648	3.85748	2.20872	3.7224	0.816051
dd_Smed_v6_4149_0	0.393108	1.10621	2.81401	3.70204	0.826554	Dwil	Drosophila willistoni	GK21830 gene product from transcript GK21830-RA	XP_002063266.1
dd_Smed_v6_3063_0	0.143834	0.997166	6.93277	3.69823	0.828518
dd_Smed_v6_3628_0	0.627659	1.54433	2.46047	3.67506	0.840472	KIAA0513	Homo sapiens	KIAA0513	NP_001273495.1
dd_Smed_v6_6990_0	0.274436	0.941885	3.43207	3.66896	0.84362	PTPRN2	Homo sapiens	protein tyrosine phosphatase, receptor type, N polypeptide 2	NP_570858.2
dd_Smed_v6_4540_0	0.13325	1.6217	12.1704	3.61989	0.868939	PRSS12	Homo sapiens	protease, serine 12	NP_003610.2
dd_Smed_v6_3122_0	0.669896	1.72278	2.5717	3.61418	0.871881	CLSTN2	Homo sapiens	calsyntenin 2	NP_071414.2
dd_Smed_v6_6854_0	2.15127	7.92071	3.68187	3.55903	0.897868
dd_Smed_v6_10646_0	0.0452975	0.843856	18.6292	3.53719	0.908022	MACF1	Homo sapiens	microtubule-actin crosslinking factor 1	NP_036222.3
dd_Smed_v6_4772_0	0.323004	1.05562	3.26814	3.52943	0.911629	LOC100635600	Amphimedon queenslandica	monocarboxylate transporter 9-like	XP_003384210.1
dd_Smed_v6_6478_0	0.602939	1.6502	2.73693	3.52311	0.914566	SYNGR2	Homo sapiens	synaptogyrin 2	NP_004701.1
dd_Smed_v6_8895_0	0.0699123	0.519376	7.42897	3.521	0.915546	KCTD16	Homo sapiens	potassium channel tetramerization domain containing 16	NP_065819.1
dd_Smed_v6_13730_0	0.115866	0.806043	6.95667	3.51499	0.918337
dd_Smed_v6_4147_0	0.208434	0.944374	4.53081	3.5134	0.919078	CLSTN1	Homo sapiens	calsyntenin 1	XP_005263489.1
dd_Smed_v6_7243_0	0.309671	0.982075	3.17135	3.50679	0.922148	SYT11	Homo sapiens	synaptotagmin 11	NP_689493.3
dd_Smed_v6_2635_0	2.52022	5.40204	2.14348	3.46809	0.939835	LOC100537530	Danio rerio	zinc finger protein 569-like	XP_003198544.1
dd_Smed_v6_703_0	1.04201	2.42868	2.33076	3.45237	0.946105	DOHH	Homo sapiens	deoxyhypusine hydroxylase/monooxygenase	NP_112594.1
dd_Smed_v6_6208_0	0.320055	1.68603	5.26795	3.43606	0.952615	CHAT	Homo sapiens	choline O-acetyltransferase	NP_066264.3
dd_Smed_v6_15771_0	0.00922615	0.802448	86.9755	3.39797	0.967808
dd_Smed_v6_17087_0	0.11238	0.575323	5.11945	3.38553	0.972774	Stom	Mus musculus	stomatin	NP_038543.1
dd_Smed_v6_1665_0	4.16044	8.02682	1.92932	3.36927	0.979259
dd_Smed_v6_12278_0	1.3763	3.06197	2.22478	3.34739	0.987986	ERC1	Homo sapiens	ELKS/RAB6-interacting/CAST family member 1	NP_829883.1
dd_Smed_v6_14010_0	0.0744199	0.611495	8.21681	3.28136	0.995197	CELF4	Homo sapiens	CUGBP, Elav-like family member 4	NP_001020260.1
dd_Smed_v6_11471_0	0.162974	0.809034	4.96418	3.24893	0.997198	UNC80	Homo sapiens	unc-80 homolog, NALCN activator	XP_005246533.1
dd_Smed_v6_8548_0	0.132752	0.556014	4.18835	3.24386	0.997511	Ncam2	Mus musculus	neural cell adhesion molecule 2	NP_035084.1
dd_Smed_v6_342_0	0.157059	0.617563	3.93204	3.20443	0.999944	HTATIP2	Homo sapiens	HIV-1 Tat interactive protein 2	NP_006401.3
dd_Smed_v6_510_0	1.28386	2.33723	1.82048	3.16815	1	ENO1	Homo sapiens	enolase 1, (alpha)	NP_001419.1
dd_Smed_v6_3230_0	0.0619199	0.441474	7.12976	3.16595	1	GRHPR	Homo sapiens	glyoxylate reductase/hydroxypyruvate reductase	NP_036335.1
dd_Smed_v6_3649_0	0.149695	0.561473	3.75077	3.15604	1	AGRN	Homo sapiens	agrin	XP_006710696.1
dd_Smed_v6_13469_0	0.0810062	0.897073	11.0741	3.14265	1
dd_Smed_v6_11255_0	0.250538	0.819173	3.26965	3.13325	1
dd_Smed_v6_12033_0	0.0335132	0.411861	12.2895	3.1285	1	CD82	Homo sapiens	CD82 molecule	NP_002222.1
dd_Smed_v6_21049_0	0.0210181	0.57733	27.4683	3.1248	1
dd_Smed_v6_2805_0	0.603511	5.83077	9.66141	3.12139	1
dd_Smed_v6_7383_0	0.369036	1.00196	2.71508	3.06972	1	HIST2H2AC	Homo sapiens	histone cluster 2, H2ac	NP_003508.1
dd_Smed_v6_13872_0	0.110183	0.567111	5.14698	3.0638	1
dd_Smed_v6_3190_0	0.506705	1.44635	2.85441	3.05682	1	SLC2A3	Homo sapiens	solute carrier family 2 member 3	NP_008862.1
dd_Smed_v6_8428_0	0.00986891	0.359517	36.4293	3.05175	1
dd_Smed_v6_4805_0	0.30303	0.796211	2.6275	3.04914	1	CpipJ	Culex quinquefasciatus	vacuolar proton ATPase	XP_001847258.1
dd_Smed_v6_4244_0	0.900713	1.86965	2.07574	3.03965	1	PRKCA	Homo sapiens	protein kinase C alpha	NP_002728.1
dd_Smed_v6_7323_0	0.263002	0.998611	3.79697	3.03463	1	MSI1	Homo sapiens	musashi RNA binding protein 1	XP_006719466.1
dd_Smed_v6_2789_0	0.335663	0.994753	2.96355	3.03136	1
dd_Smed_v6_7911_0	0.135111	0.547683	4.05358	3.023	1	ROR1	Homo sapiens	receptor tyrosine kinase-like orphan receptor 1	NP_005003.2
dd_Smed_v6_9324_0	0.754176	2.20806	2.92778	3.01947	1	PLCB4	Callithrix jacchus	phospholipase C, beta 4	XP_003732857.1
dd_Smed_v6_11039_0	0.10651	0.579027	5.43636	3.0086	1	LOC100376069	Saccoglossus kowalevskii	calcium/calmodulin-dependent 3',5'-cyclic nucleotide phosphodiesterase 1C-like	XP_006819270.1
dd_Smed_v6_1635_0	0.19821	0.809791	4.08551	2.98988	1
dd_Smed_v6_15876_0	0.0465084	0.307704	6.61608	2.98563	1	KCND1	Homo sapiens	potassium voltage-gated channel subfamily D member 1	NP_004970.3
dd_Smed_v6_13704_0	0.0230974	0.450834	19.5188	2.97802	1	PTF1A	Homo sapiens	pancreas specific transcription factor, 1a	NP_835455.1
dd_Smed_v6_5031_0	0.485631	1.22838	2.52946	2.94429	1
dd_Smed_v6_7792_0	1.45458	3.00365	2.06496	2.9334	1	DGKQ	Homo sapiens	diacylglycerol kinase, theta 110kDa	NP_001338.2
dd_Smed_v6_10294_0	0.385428	0.897501	2.32858	2.92392	1
dd_Smed_v6_1205_0	5.03238	11.9733	2.37925	2.91782	1	MACF1	Homo sapiens	microtubule-actin crosslinking factor 1	XP_005270757.1
dd_Smed_v6_8276_0	0.439394	1.29447	2.94602	2.89117	1	ECE2	Homo sapiens	endothelin converting enzyme 2	NP_001032401.1
dd_Smed_v6_13591_0	0.137673	0.61539	4.46993	2.88104	1	C11orf65	Homo sapiens	chromosome 11 open reading frame 65	XP_005271471.1
dd_Smed_v6_6994_0	0.182488	0.561105	3.07475	2.88017	1	SLC15A2	Homo sapiens	solute carrier family 15 member 2	NP_066568.3
dd_Smed_v6_19866_0	0.0298587	0.295817	9.90721	2.87326	1	FZD5	Homo sapiens	frizzled class receptor 5	NP_003459.2
dd_Smed_v6_12784_0	0.0402029	0.697567	17.3512	2.8448	1	TXN	Homo sapiens	thioredoxin	NP_003320.2
dd_Smed_v6_9461_0	0.065304	0.39718	6.08202	2.84241	1	Rbfox2	Mus musculus	RNA binding protein, fox-1 homolog (C. elegans) 2	NP_001273346.1
dd_Smed_v6_5118_0	0.0496192	0.302672	6.09989	2.84199	1	UNC80	Bos taurus	unc-80 homolog (C. elegans)	NP_001193492.1
dd_Smed_v6_7562_0	0.258108	0.693787	2.68797	2.83872	1	gria1	Xenopus tropicalis	glutamate receptor, ionotropic, AMPA 1	XP_002941535.1
dd_Smed_v6_2483_0	3.48581	5.964	1.71093	2.82524	1
dd_Smed_v6_5193_0	0.0242541	0.382185	15.7576	2.8175	1	PLAC8	Homo sapiens	placenta-specific 8	NP_057703.1
dd_Smed_v6_10176_0	0.544093	1.32276	2.43113	2.78277	1	LOC101021456	Papio anubis	receptor-type tyrosine-protein phosphatase delta-like	XP_003911762.1
dd_Smed_v6_2492_0	0.101182	1.50183	14.8428	2.78109	1	KLKB1	Homo sapiens	kallikrein B, plasma (Fletcher factor) 1	XP_006714276.1
dd_Smed_v6_5005_0	0.828823	1.59131	1.91996	2.77889	1	AgaP	Anopheles gambiae str. PEST	AGAP010422-PA	XP_311526.4
dd_Smed_v6_6396_0	0.189742	0.603695	3.18167	2.77392	1	CG42540	Drosophila melanogaster	CG42540 gene product from transcript CG42540-RB	NP_729016.2
dd_Smed_v6_2191_0	1.19296	2.17261	1.82118	2.76939	1
dd_Smed_v6_13255_0	0.0648139	0.371031	5.72456	2.74807	1	SNAP25	Homo sapiens	synaptosomal-associated protein, 25kDa	NP_003072.2
dd_Smed_v6_13082_0	0.257145	1.02688	3.99339	2.70711	1	CDKL1	Homo sapiens	cyclin dependent kinase like 1	NP_004187.2
dd_Smed_v6_11394_0	0.547262	1.62464	2.96867	2.70472	1	UNC13B	Homo sapiens	unc-13 homolog B (C. elegans)	NP_006368.3
dd_Smed_v6_10921_0	0.243409	0.960337	3.94537	2.6703	1	SKI	Homo sapiens	SKI proto-oncogene	NP_003027.1
dd_Smed_v6_16476_0	0.0359715	0.337828	9.39154	2.66872	1	Ir25a	Drosophila melanogaster	Ionotropic receptor 25a	NP_608863.2
dd_Smed_v6_3577_0	0.616811	1.24402	2.01686	2.66731	1
dd_Smed_v6_6252_0	0.184876	0.563107	3.04587	2.65942	1
dd_Smed_v6_14794_0	0.479923	1.48882	3.1022	2.65399	1	Ptprs	Mus musculus	protein tyrosine phosphatase, receptor type, S	NP_001239382.1
dd_Smed_v6_1604_0	0.242182	0.635603	2.62448	2.64656	1	AaeL	Aedes aegypti	AAEL006895-PA	XP_001652300.1
dd_Smed_v6_8187_0	0.346283	1.01933	2.94364	2.64406	1	GRIN1	Homo sapiens	glutamate receptor, ionotropic, N-methyl D-aspartate 1	NP_015566.1
dd_Smed_v6_3940_0	0.557814	1.38475	2.48246	2.6386	1	RABGAP1L	Homo sapiens	RAB GTPase activating protein 1-like	XP_005245737.1
dd_Smed_v6_196_0	2.67078	4.32583	1.61969	2.63083	1	PCK2	Homo sapiens	phosphoenolpyruvate carboxykinase 2, mitochondrial	NP_004554.3
dd_Smed_v6_10293_0	0.103319	0.371376	3.59447	2.6276	1	FHL3	Homo sapiens	four and a half LIM domains 3	NP_004459.2
dd_Smed_v6_7219_0	0.272398	0.665982	2.44488	2.62535	1
dd_Smed_v6_17008_0	0.0156056	0.219971	14.0956	2.62319	1	SSTR1	Homo sapiens	somatostatin receptor 1	NP_001040.1
dd_Smed_v6_2392_0	2.45611	4.13033	1.68166	2.61777	1	RBM10	Homo sapiens	RNA binding motif protein 10	NP_690595.1
dd_Smed_v6_815_0	0.452059	0.997006	2.20548	2.61757	1
dd_Smed_v6_7928_0	0.343687	0.787674	2.29184	2.6124	1	Golga3	Cricetulus griseus	golgin A3	XP_003501767.1
dd_Smed_v6_7723_0	0.637417	1.49886	2.35146	2.60974	1	CASK	Homo sapiens	calcium/calmodulin-dependent serine protein kinase (MAGUK family)	NP_001119527.1
dd_Smed_v6_11051_0	0.548432	1.30646	2.38218	2.59928	1	CG43729	Drosophila melanogaster	CG43729 gene product from transcript CG43729-RH	NP_001260994.1
dd_Smed_v6_3686_0	0.201926	0.594051	2.94192	2.58915	1
dd_Smed_v6_7422_0	0.170455	0.483401	2.83595	2.58381	1	NCAM1	Bos mutus	neural cell adhesion molecule 1	XP_005905179.1
dd_Smed_v6_17498_0	0.111447	0.471545	4.2311	2.57783	1
dd_Smed_v6_11513_1	0.0355217	0.313308	8.8202	2.57134	1	SEC14L2	Homo sapiens	SEC14 like lipid binding 2	NP_036561.1
dd_Smed_v6_3908_0	0.873239	1.77926	2.03754	2.55151	1
dd_Smed_v6_10718_0	0.162099	0.640958	3.95411	2.54981	1	Foxa2	Mus musculus	forkhead box A2	NP_001277996.1
dd_Smed_v6_7111_0	0.664311	1.29539	1.94998	2.54664	1	STXBP1	Homo sapiens	syntaxin binding protein 1	NP_003156.1
dd_Smed_v6_10171_0	0.278684	0.84183	3.02074	2.53721	1	Gabrg3	Mus musculus	gamma-aminobutyric acid (GABA) A receptor, subunit gamma 3	NP_032100.2
dd_Smed_v6_1147_0	2.81796	4.04291	1.43469	2.53288	1	Tcerg1	Mus musculus	transcription elongation regulator 1 (CA150)	XP_006526178.1
dd_Smed_v6_9830_0	0.125185	0.463614	3.70342	2.52577	1	Dsim	Drosophila simulans	GD16559 gene product from transcript GD16559-RA	XP_002105904.1
dd_Smed_v6_884_0	1.47832	2.61372	1.76803	2.52115	1	LOC101164884	Oryzias latipes	interferon-induced GTP-binding protein Mx-like	XP_004068905.1
dd_Smed_v6_8076_0	0.0806335	0.367018	4.55167	2.51665	1	PDE2A	Homo sapiens	phosphodiesterase 2A	NP_002590.1
dd_Smed_v6_9183_0	0.208499	0.610684	2.92895	2.51572	1	DPP6	Homo sapiens	dipeptidyl-peptidase 6	NP_001927.3
dd_Smed_v6_1187_0	0.784112	1.51313	1.92973	2.50901	1	LOC100868263	Apis florea	mitochondrial ubiquitin ligase activator of nfkb 1-like	XP_003698863.1
dd_Smed_v6_21902_0	0.0201583	0.230499	11.4344	2.5052	1	LOC100200582	Hydra vulgaris	NADPH azoreductase-like	XP_002154885.1
dd_Smed_v6_7141_0	0.0438379	0.493796	11.2641	2.49993	1
dd_Smed_v6_4154_0	0.230801	0.628126	2.7215	2.49919	1	GPC4	Homo sapiens	glypican 4	NP_001439.2
dd_Smed_v6_1737_0	0.104763	10.7389	102.507	2.49434	1
dd_Smed_v6_1140_0	1.99056	3.11757	1.56618	2.49012	1	DYNC1H1	Homo sapiens	dynein, cytoplasmic 1, heavy chain 1	NP_001367.2
dd_Smed_v6_18559_0	0.176498	0.518354	2.93689	2.48871	1	SCYL2	Homo sapiens	SCY1 like pseudokinase 2	NP_060458.3
dd_Smed_v6_6476_0	0.343496	0.883502	2.57208	2.48865	1	LOC103131740	Poecilia formosa	breast cancer anti-estrogen resistance protein 1-like	XP_007543513.1
dd_Smed_v6_10764_0	0.0880912	0.499626	5.67169	2.48002	1	LOC102670613	Apis dorsata	ankyrin repeat domain-containing protein 6-like	XP_006612024.1
dd_Smed_v6_4743_0	0.204769	0.636234	3.10708	2.47493	1	BRAFLDRAFT	Branchiostoma floridae	hypothetical protein	XP_002594633.1
dd_Smed_v6_9615_0	1.56294	2.8612	1.83065	2.47102	1
dd_Smed_v6_13460_0	0.230561	0.79309	3.43983	2.46998	1
dd_Smed_v6_6650_0	0.262071	0.636941	2.43041	2.46962	1	lap	Drosophila melanogaster	like-AP180	NP_524252.2
dd_Smed_v6_24316_0	0.179762	0.673793	3.74825	2.46866	1	BRAFLDRAFT	Branchiostoma floridae	hypothetical protein	XP_002613873.1
dd_Smed_v6_3211_0	0.395224	4.4957	11.3751	2.46844	1	LOC101732238	Xenopus (Silurana) tropicalis	tetra-peptide repeat homeobox protein 1-like	XP_004913182.1
dd_Smed_v6_10305_0	0.0985949	0.534464	5.42081	2.45697	1
dd_Smed_v6_2177_0	0.0404107	0.523659	12.9584	2.45443	1
dd_Smed_v6_13280_0	0.0694907	0.368122	5.29744	2.45317	1	NEMVEDRAFT	Nematostella vectensis	hypothetical protein	XP_001633449.1
dd_Smed_v6_4845_0	0.527851	1.27404	2.41363	2.44417	1	AT3G14250	Arabidopsis thaliana	RING/U-box superfamily protein	NP_188042.2
dd_Smed_v6_6863_0	0.787204	1.68685	2.14283	2.43884	1	Dnm1	Mus musculus	dynamin 1	NP_034195.2
dd_Smed_v6_2998_0	0.33429	0.808885	2.41971	2.43704	1	Adcy9	Mus musculus	adenylate cyclase 9	NP_033754.2
dd_Smed_v6_7731_0	1.92608	3.4698	1.80148	2.43128	1	Egr4	Mus musculus	early growth response 4	NP_065621.1
dd_Smed_v6_10518_0	0.270341	0.761136	2.81547	2.42955	1	Guk1	Mus musculus	guanylate kinase 1	NP_001152882.1
dd_Smed_v6_7644_0	0.123555	0.528629	4.27847	2.42627	1	NPR1	Homo sapiens	natriuretic peptide receptor 1	NP_000897.3
dd_Smed_v6_3400_0	0.203147	0.794583	3.91138	2.42374	1
dd_Smed_v6_8885_0	0.0441127	0.260156	5.89753	2.41133	1	LOC100576746	Apis mellifera	uncharacterized LOC100576746	XP_006568585.1
dd_Smed_v6_13306_0	0.625095	1.54177	2.46645	2.40692	1	DAGLB	Homo sapiens	diacylglycerol lipase beta	NP_631918.3
dd_Smed_v6_8262_0	0.322095	0.727049	2.25725	2.40447	1	MRC2	Homo sapiens	mannose receptor C type 2	NP_006030.2
dd_Smed_v6_101944_0	0.144619	0.481711	3.33089	2.4037	1
dd_Smed_v6_12929_0	0.142802	0.514132	3.60032	2.40316	1	DIRAS2	Homo sapiens	DIRAS family GTPase 2	NP_060064.2
dd_Smed_v6_1656_0	0.976567	1.80157	1.8448	2.40293	1	GNAO1	Homo sapiens	G protein subunit alpha o1	NP_066268.1
dd_Smed_v6_9630_0	0.317556	0.833967	2.6262	2.4022	1	LOC102687875	Lepisosteus oculatus	kinase D-interacting substrate of 220 kDa-like	XP_006626186.1
dd_Smed_v6_10356_0	0.552334	1.0923	1.97761	2.40134	1
dd_Smed_v6_14613_0	0.220211	0.697367	3.16681	2.40109	1	PCDH9	Homo sapiens	protocadherin 9	XP_005266465.1
dd_Smed_v6_13603_0	0.147023	0.590184	4.01422	2.40078	1
dd_Smed_v6_10515_0	0.0631003	0.29902	4.73881	2.38165	1	PRKG1	Homo sapiens	protein kinase, cGMP-dependent, type I	NP_006249.1
dd_Smed_v6_2164_0	3.45772	5.09717	1.47414	2.38133	1	llgl2	Anolis carolinensis	lethal giant larvae homolog 2 (Drosophila)	XP_003217256.1
dd_Smed_v6_14595_0	0.0387649	0.25535	6.58713	2.37942	1	KCNC2	Homo sapiens	potassium voltage-gated channel subfamily C member 2	NP_715624.1
dd_Smed_v6_1851_0	0.0263479	0.462098	17.5383	2.37819	1
dd_Smed_v6_6697_0	0.330203	0.92803	2.81049	2.36746	1	Khc-73	Drosophila melanogaster	Kinesin heavy chain 73	NP_788356.2
dd_Smed_v6_14790_0	0.0714254	0.433052	6.063	2.35293	1	BCHE	Homo sapiens	butyrylcholinesterase	NP_000046.1
dd_Smed_v6_15091_0	0.0304198	0.24665	8.1082	2.3528	1	CG13375	Drosophila melanogaster	CG13375 gene product from transcript CG13375-RB	NP_001284735.1
dd_Smed_v6_14566_0	0.082855	0.368775	4.45086	2.35079	1
dd_Smed_v6_5325_0	0.95835	2.31932	2.42012	2.35024	1	DMD	Homo sapiens	dystrophin	XP_006724535.1
dd_Smed_v6_13223_0	0.0501355	0.262132	5.22848	2.34922	1	Atp2b3	Mus musculus	ATPase, Ca transporting, plasma membrane 3	XP_006528149.1
dd_Smed_v6_3003_0	0.927134	1.66116	1.79171	2.33595	1	SLC4A10	Homo sapiens	solute carrier family 4 member 10	NP_001171487.1
dd_Smed_v6_5376_0	1.94017	3.41706	1.76122	2.33424	1	MPDZ	Homo sapiens	multiple PDZ domain crumbs cell polarity complex component	NP_001248335.1
dd_Smed_v6_1015_0	0.310969	5.35882	17.2326	2.3318	1
dd_Smed_v6_4922_0	0.0882197	0.340214	3.85644	2.3316	1	LOC101080000	Takifugu rubripes	putative acyl-CoA dehydrogenase AidB-like	XP_003975047.1
dd_Smed_v6_3617_0	0.48746	0.966473	1.98267	2.33081	1	DUSP10	Homo sapiens	dual specificity phosphatase 10	NP_009138.1
dd_Smed_v6_3135_0	1.80448	2.81935	1.56241	2.31882	1	SYN2	Homo sapiens	synapsin II	NP_003169.2
dd_Smed_v6_14331_0	0.0557643	0.316558	5.67671	2.31523	1	NPR1	Homo sapiens	natriuretic peptide receptor 1	NP_000897.3
dd_Smed_v6_10785_0	0.0988413	0.347827	3.51905	2.3151	1	ACA1	Acanthamoeba castellanii str. Neff	hypothetical protein	XP_004337779.1
dd_Smed_v6_6259_0	0.132436	0.416927	3.14815	2.30798	1	JPH3	Homo sapiens	junctophilin 3	NP_065706.2
dd_Smed_v6_2872_0	0.325889	0.747021	2.29226	2.29184	1	GNB4	Homo sapiens	G protein subunit beta 4	NP_067642.1
dd_Smed_v6_8717_0	0.100383	0.400136	3.9861	2.28091	1
dd_Smed_v6_10320_0	0.0630788	0.282484	4.47827	2.27693	1	Bcl11a	Mus musculus	B cell CLL/lymphoma 11A (zinc finger protein)	XP_006514570.1
dd_Smed_v6_5411_0	0.0661148	0.258047	3.90301	2.27657	1	AgaP	Anopheles gambiae str. PEST	AGAP002992-PB	XP_563117.1
dd_Smed_v6_12130_0	0.22574	0.614408	2.72175	2.27247	1	SGSM1	Homo sapiens	small G protein signaling modulator 1	NP_001035037.1
dd_Smed_v6_5132_0	0.0665167	0.262194	3.94177	2.26778	1	ARALYDRAFT	Arabidopsis lyrata subsp. lyrata	glycine-rich protein	XP_002866925.1
dd_Smed_v6_24408_0	0.101035	0.422617	4.18287	2.26699	1	HFM1	Homo sapiens	HFM1, ATP-dependent DNA helicase homolog (S. cerevisiae)	NP_001017975.4
dd_Smed_v6_6287_0	0.0534271	0.272271	5.09611	2.2666	1
dd_Smed_v6_9557_0	0.0906642	0.331065	3.65155	2.26528	1	LOC102680462	Apis dorsata	plasma membrane calcium-transporting ATPase 3-like	XP_006607478.1
dd_Smed_v6_1721_0	1.33307	2.18472	1.63886	2.25794	1	ATP2B3	Homo sapiens	ATPase plasma membrane Ca2 transporting 3	NP_001001344.1
dd_Smed_v6_12977_0	0.213498	0.767905	3.59678	2.25561	1	DOC2B	Homo sapiens	double C2 domain beta	NP_003576.2
dd_Smed_v6_12978_0	0.342367	1.02859	3.00434	2.24994	1	KCNH7	Homo sapiens	potassium voltage-gated channel subfamily H member 7	NP_150375.2
dd_Smed_v6_4713_0	0.404447	0.855832	2.11606	2.24836	1	RILPL1	Homo sapiens	Rab interacting lysosomal protein-like 1	NP_847884.2
dd_Smed_v6_5074_0	0.262256	0.621213	2.36873	2.23965	1	CG9674	Drosophila melanogaster	CG9674 gene product from transcript CG9674-RD	NP_648922.1
dd_Smed_v6_12440_0	0.0658482	0.335466	5.09453	2.23561	1	Kctd12b	Mus musculus	potassium channel tetramerisation domain containing 12b	NP_780638.1
dd_Smed_v6_8355_0	0.83366	2.41396	2.89562	2.23524	1	MADD	Homo sapiens	MAP kinase activating death domain	XP_005253263.1
dd_Smed_v6_7570_0	0.174167	0.627905	3.6052	2.23406	1	Slc1a2	Mus musculus	solute carrier family 1 (glial high affinity glutamate transporter), member 2	XP_006499108.1
dd_Smed_v6_4661_0	0.163843	0.417166	2.54614	2.22783	1	GPD1	Homo sapiens	glycerol-3-phosphate dehydrogenase 1	NP_005267.2
dd_Smed_v6_11815_0	0.11735	0.350656	2.98812	2.21415	1
dd_Smed_v6_7278_0	0.310397	0.646336	2.08229	2.21093	1	AgaP	Anopheles gambiae str. PEST	AGAP007789-PA	XP_317719.4
dd_Smed_v6_10013_0	0.119609	0.388015	3.24403	2.20767	1
dd_Smed_v6_13553_0	0.114383	0.33855	2.9598	2.20246	1
dd_Smed_v6_9013_0	0.279531	0.707775	2.53201	2.20132	1	NUCB1	Homo sapiens	nucleobindin 1	NP_006175.2
dd_Smed_v6_16420_0	0.122198	0.410067	3.35575	2.19948	1
dd_Smed_v6_2480_0	0.299978	0.626847	2.08964	2.19539	1	Napa	Mus musculus	N-ethylmaleimide sensitive fusion protein attachment protein alpha	NP_080174.1
dd_Smed_v6_13710_0	0.087235	0.288725	3.30974	2.19214	1	Kcnb1	Mus musculus	potassium voltage gated channel, Shab-related subfamily, member 1	NP_032446.2
dd_Smed_v6_2201_0	4.56035	6.94798	1.52356	2.18771	1	Hormad2	Mus musculus	HORMA domain containing 2	NP_083734.1
dd_Smed_v6_9612_0	0.0730335	0.284708	3.89832	2.18757	1	INPP1	Homo sapiens	inositol polyphosphate-1-phosphatase	NP_002185.1
dd_Smed_v6_16725_0	0.0278962	0.274187	9.82884	2.1864	1	NPFFR2	Homo sapiens	neuropeptide FF receptor 2	NP_444264.1
dd_Smed_v6_15331_0	0.0630378	0.28281	4.48635	2.18093	1	GLRA3	Homo sapiens	glycine receptor alpha 3	NP_006520.2
dd_Smed_v6_11474_0	0.0411584	0.224615	5.45733	2.17882	1
dd_Smed_v6_8648_0	0.33356	0.705856	2.11613	2.17671	1	RGS5	Homo sapiens	regulator of G-protein signaling 5	NP_003608.1
dd_Smed_v6_14980_0	0.0524151	0.229789	4.38403	2.1767	1	IGFn3-4	Apis mellifera	immunoglobulin-like and fibronectin type III domain containing 4	XP_006564421.1
dd_Smed_v6_15986_0	0.0663689	0.323025	4.86712	2.1657	1
dd_Smed_v6_1796_0	1.03102	1.65985	1.6099	2.16516	1	RTN1	Taeniopygia guttata	reticulon 1	XP_002200640.1
dd_Smed_v6_4632_0	0.0997583	0.615669	6.1716	2.16512	1	SAMHD1	Homo sapiens	SAM and HD domain containing deoxynucleoside triphosphate triphosphohydrolase 1	NP_056289.2
dd_Smed_v6_580_0	0.282503	0.577946	2.04581	2.15538	1	PITPNA	Homo sapiens	phosphatidylinositol transfer protein alpha	NP_006215.1
dd_Smed_v6_508_0	1.22703	2.44366	1.99153	2.15377	1	TUBA1C	Homo sapiens	tubulin alpha 1c	NP_116093.1
dd_Smed_v6_4454_0	0.419826	0.963133	2.29412	2.14402	1
dd_Smed_v6_5532_0	0.130102	0.406905	3.12759	2.14295	1	RNF150	Homo sapiens	ring finger protein 150	NP_065775.1
dd_Smed_v6_2575_0	0.0201351	6.07179	301.552	2.14246	1
dd_Smed_v6_7254_0	0.364263	0.716761	1.9677	2.12537	1	LOC100180023	Ciona intestinalis	universal stress protein A-like protein	XP_002130444.1
dd_Smed_v6_18313_0	0.285514	0.693152	2.42773	2.12166	1	RASGRF1	Homo sapiens	Ras protein specific guanine nucleotide releasing factor 1	NP_001139120.1
dd_Smed_v6_11459_0	0.129545	0.536006	4.13761	2.12033	1	TNFAIP8L1	Homo sapiens	tumor necrosis factor, alpha-induced protein 8-like 1	NP_001161414.1
dd_Smed_v6_477_0	0.0657686	0.362678	5.51445	2.11926	1	PLAC8	Homo sapiens	placenta-specific 8	NP_057703.1
dd_Smed_v6_1857_0	0.00835764	0.993829	118.913	2.11904	1
dd_Smed_v6_9716_1	0.360597	0.839822	2.32897	2.11417	1	PLCE1	Homo sapiens	phospholipase C epsilon 1	NP_001275918.1
dd_Smed_v6_13470_0	0.403246	0.921728	2.28577	2.11179	1
dd_Smed_v6_7142_0	0.0462649	0.317575	6.86429	2.11006	1
dd_Smed_v6_5156_0	0.412634	0.918338	2.22555	2.10531	1	HIST1H2AA	Homo sapiens	histone cluster 1, H2aa	NP_734466.1
dd_Smed_v6_7780_0	0.0631546	0.234003	3.70524	2.10496	1	B3galt5	Mus musculus	UDP-Gal:betaGlcNAc beta 1,3-galactosyltransferase, polypeptide 5	NP_149161.1
dd_Smed_v6_6922_0	0.178197	0.483181	2.7115	2.09745	1	STOM	Homo sapiens	stomatin	NP_004090.4
dd_Smed_v6_10267_0	0.0154877	0.309534	19.9858	2.08848	1	KLKB1	Homo sapiens	kallikrein B, plasma (Fletcher factor) 1	NP_000883.2
dd_Smed_v6_6290_0	0.0923624	0.306804	3.32174	2.08835	1
dd_Smed_v6_6534_0	0.257156	0.585781	2.27792	2.08619	1	PELI2	Homo sapiens	pellino E3 ubiquitin protein ligase family member 2	NP_067078.1
dd_Smed_v6_11876_0	0.0592605	0.252004	4.25249	2.08192	1	JAG1	Homo sapiens	jagged 1	NP_000205.1
dd_Smed_v6_5576_0	0.240276	1.2193	5.07457	2.07447	1	CG31221	Drosophila melanogaster	CG31221 gene product from transcript CG31221-RA	NP_732424.1
dd_Smed_v6_12951_0	0.169358	0.406125	2.39803	2.07341	1	ZBED5	Homo sapiens	zinc finger BED-type containing 5	NP_067034.2
dd_Smed_v6_7331_0	0.262119	0.598734	2.28421	2.07306	1	STOM	Homo sapiens	stomatin	NP_004090.4
dd_Smed_v6_11838_0	0.106501	0.355307	3.33617	2.07158	1	NEMVEDRAFT	Nematostella vectensis	hypothetical protein	XP_001631170.1
dd_Smed_v6_11905_0	0.365213	0.889155	2.43462	2.06992	1
dd_Smed_v6_11691_0	0.281559	0.882038	3.13269	2.06072	1
dd_Smed_v6_8916_0	0.114645	0.369729	3.22501	2.05347	1	VPS51	Homo sapiens	VPS51, GARP complex subunit	NP_037397.2
dd_Smed_v6_1532_0	0.352984	0.674005	1.90945	2.05325	1	PYGM	Homo sapiens	phosphorylase, glycogen, muscle	NP_005600.1
dd_Smed_v6_2842_0	2.62615	3.72182	1.41722	2.05247	1	SDSL	Camelus ferus	serine dehydratase-like	XP_006183901.1
dd_Smed_v6_9548_0	0.202442	0.565559	2.79369	2.0521	1	SYT14	Homo sapiens	synaptotagmin 14	NP_001242935.1
dd_Smed_v6_919_0	5.17887	6.69829	1.29339	2.05158	1	SPTAN1	Homo sapiens	spectrin, alpha, non-erythrocytic 1	NP_001182461.1
dd_Smed_v6_19631_0	0.046868	0.212623	4.53664	2.04983	1	ARRB2	Homo sapiens	arrestin, beta 2	NP_004304.1
dd_Smed_v6_13562_0	0.4802	0.983045	2.04716	2.04631	1	Kif26a	Mus musculus	kinesin family member 26A	XP_006516226.1
dd_Smed_v6_12771_0	1.01555	2.28832	2.25327	2.04453	1	Ptprf	Mus musculus	protein tyrosine phosphatase, receptor type, F	XP_006502928.1
dd_Smed_v6_4624_0	0.121374	1.39068	11.4579	2.042	1
dd_Smed_v6_7519_0	0.487167	0.86911	1.78401	2.03884	1	Traf6	Mus musculus	TNF receptor-associated factor 6	NP_033450.2
dd_Smed_v6_8899_0	8.41155	12.792	1.52077	2.03853	1	Cacna1f	Mus musculus	calcium channel, voltage-dependent, alpha 1F subunit	NP_062528.2
dd_Smed_v6_11266_0	0.0693937	0.242887	3.50012	2.03397	1	LRIG2	Homo sapiens	leucine-rich repeats and immunoglobulin like domains 2	NP_055628.1
dd_Smed_v6_4202_0	0.601698	1.02169	1.69801	2.02844	1	SRPK3	Homo sapiens	SRSF protein kinase 3	NP_001164232.1
dd_Smed_v6_11081_0	0.214033	0.666519	3.11409	2.02367	1
dd_Smed_v6_9790_0	0.0659788	0.296506	4.49395	2.01967	1	Scnn1g	Mus musculus	sodium channel, nonvoltage-gated 1 gamma	XP_006507540.1
dd_Smed_v6_4863_0	0.187132	0.448026	2.39417	2.01727	1	PAM	Homo sapiens	peptidylglycine alpha-amidating monooxygenase	XP_006714702.1
dd_Smed_v6_6756_0	0.111096	1.54983	13.9504	2.01058	1	Crispld2	Mus musculus	cysteine-rich secretory protein LCCL domain containing 2	NP_084485.1
dd_Smed_v6_5266_0	0.181716	0.479262	2.63742	2.01032	1	HPCAL1	Homo sapiens	hippocalcin like 1	NP_002140.2
dd_Smed_v6_8544_1	0.200106	0.565218	2.82459	2.00788	1	GRAMD1A	Leptonychotes weddellii	GRAM domain containing 1A	XP_006730823.1
dd_Smed_v6_8386_0	0.194086	0.480714	2.47681	2.00746	1	TRIM9	Homo sapiens	tripartite motif containing 9	NP_055978.4
dd_Smed_v6_13788_0	0.16002	0.412257	2.57629	2.00154	1	CDK5R1	Homo sapiens	cyclin-dependent kinase 5, regulatory subunit 1 (p35)	NP_003876.1
dd_Smed_v6_7168_1	0.198264	0.531042	2.67847	1.99993	1
dd_Smed_v6_8568_1	0.26962	0.589438	2.18618	1.99817	1
dd_Smed_v6_10315_0	0.320556	0.720575	2.24789	1.99781	1	LOC100287651	Homo sapiens	lipoxygenase homology domain-containing protein 1-like	XP_003403865.3
dd_Smed_v6_2270_0	0.0583319	3.45704	59.265	1.9943	1
dd_Smed_v6_2330_0	0.390362	0.841891	2.15669	1.9934	1
dd_Smed_v6_22794_0	0.0850638	0.279921	3.29072	1.99213	1	LOC101235587	Hydra vulgaris	uncharacterized LOC101235587	XP_004208818.1
dd_Smed_v6_1072_0	0.0235726	0.922565	39.1372	1.9885	1	Eppin	Mus musculus	epididymal peptidase inhibitor	NP_083601.1
dd_Smed_v6_13721_0	0.0424202	0.225928	5.32596	1.98681	1	nompc	Xenopus laevis	transient receptor potential channel-like	NP_001089174.1
dd_Smed_v6_16758_0	0.102604	0.372923	3.63457	1.98645	1
dd_Smed_v6_7756_0	0.223667	0.554249	2.47801	1.98618	1	STIM1	Homo sapiens	stromal interaction molecule 1	NP_001264891.1
dd_Smed_v6_16339_0	0.0275258	0.257833	9.36696	1.98499	1
dd_Smed_v6_4078_0	1.42366	2.56671	1.80289	1.98339	1	GPC6	Homo sapiens	glypican 6	NP_005699.1
dd_Smed_v6_12936_0	0.0844787	0.277701	3.28723	1.98309	1	ANKRD50	Homo sapiens	ankyrin repeat domain 50	NP_065070.1
dd_Smed_v6_2513_0	0.321907	0.630779	1.95951	1.9783	1	SNX27	Homo sapiens	sorting nexin family member 27	NP_112180.4
dd_Smed_v6_2701_0	0.0821348	0.552459	6.72625	1.97769	1	GRN	Homo sapiens	granulin	NP_002078.1
dd_Smed_v6_2566_0	0.0485095	1.17627	24.2482	1.97673	1	TMPRSS2	Homo sapiens	transmembrane protease, serine 2	XP_005261101.1
dd_Smed_v6_11981_0	0.557583	1.06868	1.91663	1.97281	1	UNC13B	Homo sapiens	unc-13 homolog B (C. elegans)	NP_006368.3
dd_Smed_v6_12933_0	0.130636	0.472683	3.61833	1.96953	1	NPR1	Homo sapiens	natriuretic peptide receptor 1	NP_000897.3
dd_Smed_v6_59338_0	0.0043548	0.341743	78.4751	1.96559	1
dd_Smed_v6_13741_0	0.170126	0.485688	2.85487	1.96441	1
dd_Smed_v6_5483_0	1.40492	2.46297	1.7531	1.95904	1	TRIO	Homo sapiens	trio Rho guanine nucleotide exchange factor	NP_009049.2
dd_Smed_v6_12647_0	0.139906	0.400864	2.86524	1.95236	1	SYT15	Homo sapiens	synaptotagmin XV	XP_006718070.1
dd_Smed_v6_3629_0	1.64499	2.56488	1.55921	1.94667	1	LOC100641111	Amphimedon queenslandica	protein F37C4.5-like	XP_003383296.1
dd_Smed_v6_2205_0	0.0776501	0.362886	4.67336	1.94348	1
dd_Smed_v6_5529_0	0.0158847	0.258056	16.2456	1.94198	1	SLC30A2	Homo sapiens	solute carrier family 30 member 2	NP_001004434.1
dd_Smed_v6_889_0	0.201976	1.23761	6.1275	1.93452	1
dd_Smed_v6_8110_0	0.249918	0.542258	2.16974	1.9331	1	GLRA3	Homo sapiens	glycine receptor alpha 3	NP_001036008.1
dd_Smed_v6_14606_0	0.0983583	0.318999	3.24323	1.93118	1	abts-3	Caenorhabditis elegans	Anion/Bicarbonate TranSporter family	NP_495228.1
dd_Smed_v6_10934_0	0.1189	0.314479	2.6449	1.92949	1	Dana	Drosophila ananassae	GF15825 gene product from transcript GF15825-RA	XP_001963190.1
dd_Smed_v6_10467_0	0.0793948	0.268628	3.38345	1.92722	1	PCDH11X	Homo sapiens	protocadherin 11 X-linked	NP_001161833.1
dd_Smed_v6_397_0	1.72348	2.47629	1.43679	1.92417	1
dd_Smed_v6_3312_0	0.0567347	3.17524	55.9665	1.92054	1	LOC102717123	Oryza brachyantha	uncharacterized LOC102717123	XP_006665076.1
dd_Smed_v6_3075_0	0.0293747	1.10391	37.5802	1.91845	1	KLKB1	Homo sapiens	kallikrein B, plasma (Fletcher factor) 1	XP_006714276.1
dd_Smed_v6_13840_0	0.0950856	0.300838	3.16387	1.91708	1	LOC101854574	Aplysia californica	girdin-like	XP_005098734.1
dd_Smed_v6_15930_0	0.14642	0.440938	3.01145	1.91394	1	BCHE	Homo sapiens	butyrylcholinesterase	NP_000046.1
dd_Smed_v6_5327_0	0.214721	0.455434	2.12106	1.90964	1	LOC100371219	Saccoglossus kowalevskii	RNA-binding motif, single-stranded-interacting protein 3-like	XP_006819317.1
dd_Smed_v6_12048_0	0.167811	0.424167	2.52765	1.90903	1	LOC100833425	Brachypodium distachyon	calmodulin-like protein 1-like	XP_003576349.1
dd_Smed_v6_1386_0	0.712332	1.16405	1.63414	1.90839	1
dd_Smed_v6_8926_0	0.490449	0.9149	1.86543	1.9072	1	CACNA2D3	Homo sapiens	calcium channel, voltage-dependent, alpha 2/delta subunit 3	XP_005265376.1
dd_Smed_v6_3394_0	0.0929536	0.297455	3.20003	1.90513	1	PDE4D	Bos taurus	phosphodiesterase 4D, cAMP-specific	XP_003583730.1
dd_Smed_v6_10334_0	0.13854	0.33213	2.39736	1.90369	1	BCHE	Zonotrichia albicollis	butyrylcholinesterase	XP_005495148.1
dd_Smed_v6_4439_0	0.321899	0.624483	1.93999	1.89773	1	Dere	Drosophila erecta	GG19448 gene product from transcript GG19448-RA	XP_001978159.1
dd_Smed_v6_1752_0	1.06407	1.85863	1.74672	1.89616	1	CAPN3	Homo sapiens	calpain 3	NP_775110.1
dd_Smed_v6_12323_0	0.291481	0.678979	2.32941	1.89431	1	CPNE5	Homo sapiens	copine 5	NP_065990.1
dd_Smed_v6_3306_0	0.0129926	1.29898	99.9785	1.89426	1
dd_Smed_v6_14220_0	0.00252739	0.117471	46.4793	1.89412	1	CG3604	Drosophila melanogaster	CG3604 gene product from transcript CG3604-RB	NP_608801.1
dd_Smed_v6_5944_0	1.12777	1.89955	1.68434	1.89337	1	DMXL1	Homo sapiens	Dmx like 1	NP_005500.4
dd_Smed_v6_8543_0	0.115991	0.363471	3.1336	1.89227	1	PCDH1	Homo sapiens	protocadherin 1	NP_002578.2
dd_Smed_v6_8312_0	0.0971304	0.366996	3.77839	1.88744	1	ARVCF	Homo sapiens	armadillo repeat gene deleted in velocardiofacial syndrome	XP_005261299.1
dd_Smed_v6_5385_0	0.0644766	0.302828	4.69672	1.88393	1	Bm1	Brugia malayi	Putative choline-phosphate cytidylyltransferase, putative	XP_001897964.1
dd_Smed_v6_12738_0	0.126155	0.337776	2.67746	1.88256	1	FBXL16	Homo sapiens	F-box and leucine-rich repeat protein 16	NP_699181.2
dd_Smed_v6_772_0	0.0940505	0.26494	2.817	1.88206	1
dd_Smed_v6_8376_0	0.129476	0.339056	2.61867	1.8816	1	ELAVL4	Homo sapiens	ELAV like neuron-specific RNA binding protein 4	NP_001138246.1
dd_Smed_v6_587_0	1.25197	1.78114	1.42268	1.87984	1	Bcl3	Mus musculus	B cell leukemia/lymphoma 3	XP_006539550.1
dd_Smed_v6_102_0	0.396606	0.776001	1.9566	1.87952	1
dd_Smed_v6_10_0	29.198	34.0311	1.16553	1.87817	1
dd_Smed_v6_1175_0	0.102483	1.28102	12.4998	1.87751	1
dd_Smed_v6_16650_0	0.158121	0.415285	2.62638	1.87593	1
dd_Smed_v6_6233_0	0.207801	0.494202	2.37825	1.87428	1	ZDHHC2	Homo sapiens	zinc finger DHHC-type containing 2	NP_057437.1
dd_Smed_v6_11743_0	0.185326	0.435059	2.34753	1.87228	1	Kidins220	Mus musculus	kinase D-interacting substrate 220	XP_006515319.1
dd_Smed_v6_9154_0	0.0711386	0.233258	3.27893	1.87108	1
dd_Smed_v6_3992_0	0.546686	0.976285	1.78582	1.87032	1	ITSN1	Homo sapiens	intersectin 1 (SH3 domain protein)	NP_003015.2
dd_Smed_v6_5153_0	0.0306805	0.321269	10.4714	1.86709	1	SLC39A10	Homo sapiens	solute carrier family 39 member 10	NP_065075.1
dd_Smed_v6_13053_0	0.183792	0.42556	2.31545	1.85978	1
dd_Smed_v6_9293_0	0.0707315	0.239186	3.38161	1.85876	1	CLUG	Clavispora lusitaniae ATCC 42720	hypothetical protein	XP_002615884.1
dd_Smed_v6_8575_0	0.224224	0.545377	2.43229	1.8578	1	HELZ	Homo sapiens	helicase with zinc finger	XP_005257946.1
dd_Smed_v6_3783_0	1.4605	2.3467	1.60678	1.85734	1	LOC101858203	Aplysia californica	uncharacterized LOC101858203	XP_005103866.1
dd_Smed_v6_7594_0	0.312767	0.642123	2.05304	1.85594	1	AGO2	Homo sapiens	argonaute 2, RISC catalytic component	NP_036286.2
dd_Smed_v6_6999_0	0.196847	0.444828	2.25976	1.85464	1	PTK7	Homo sapiens	protein tyrosine kinase 7 (inactive)	NP_690620.1
dd_Smed_v6_828_0	0.330923	0.65425	1.97705	1.85439	1	Dgri	Drosophila grimshawi	GH15532 gene product from transcript GH15532-RA	XP_001983527.1
dd_Smed_v6_991_0	1.4929	2.38981	1.60078	1.85184	1
dd_Smed_v6_5920_0	0.227823	0.459785	2.01817	1.84809	1	RAB3C	Homo sapiens	RAB3C, member RAS oncogene family	NP_612462.1
dd_Smed_v6_4145_0	0.426359	0.782265	1.83476	1.84601	1	ATP2B3	Homo sapiens	ATPase plasma membrane Ca2 transporting 3	NP_068768.2
dd_Smed_v6_10983_0	0.158148	0.389093	2.46031	1.84334	1	KCNH3	Bos taurus	potassium voltage-gated channel, subfamily H (eag-related), member 3	NP_001179300.1
dd_Smed_v6_14068_0	0.0561466	0.613317	10.9235	1.84229	1	NOG	Homo sapiens	noggin	NP_005441.1
dd_Smed_v6_22211_0	0.213349	0.715225	3.35237	1.84182	1
dd_Smed_v6_3390_0	0.1163	0.341008	2.93214	1.84037	1	BRAFLDRAFT	Branchiostoma floridae	hypothetical protein	XP_002611074.1
dd_Smed_v6_5963_0	0.356187	0.793429	2.22756	1.83934	1
dd_Smed_v6_21925_0	0.155868	0.414954	2.66222	1.83788	1	boc	Poecilia formosa	BOC cell adhesion associated, oncogene regulated	XP_007554606.1
dd_Smed_v6_13056_0	0.0729887	0.601596	8.24232	1.83283	1	Tcf7	Mus musculus	transcription factor 7, T cell specific	NP_033357.1
dd_Smed_v6_13744_0	0.256746	0.648655	2.52644	1.82838	1	acp6	Anolis carolinensis	acid phosphatase 6, lysophosphatidic	XP_003219140.1
dd_Smed_v6_6451_0	0.123926	0.335929	2.71072	1.82217	1	TNFAIP8	Homo sapiens	tumor necrosis factor, alpha-induced protein 8	XP_006714647.1
dd_Smed_v6_3928_0	0.345798	0.783205	2.26492	1.82207	1	FMNL2	Homo sapiens	formin like 2	XP_005246322.1
dd_Smed_v6_10946_0	0.723896	1.38542	1.91384	1.82065	1	EGFLAM	Homo sapiens	EGF like, fibronectin type III and laminin G domains	NP_877950.1
dd_Smed_v6_7089_0	0.31368	0.666241	2.12395	1.82032	1	AaeL	Aedes aegypti	AAEL001582-PA	XP_001653597.1
dd_Smed_v6_12109_0	0.0414357	0.201324	4.85871	1.82029	1
dd_Smed_v6_12879_0	0.229845	0.658918	2.8668	1.81746	1	POGK	Homo sapiens	pogo transposable element with KRAB domain	XP_005245429.1
dd_Smed_v6_10734_0	0.228973	0.51886	2.26603	1.8145	1	RIMS2	Homo sapiens	regulating synaptic membrane exocytosis 2	XP_006716761.1
dd_Smed_v6_1372_1	0.698767	1.31497	1.88185	1.81422	1	ATP8A1	Homo sapiens	ATPase phospholipid transporting 8A1	NP_006086.1
dd_Smed_v6_12927_0	0.0487124	0.266731	5.47563	1.81413	1	Pkn1	Mus musculus	protein kinase N1	NP_796236.2
dd_Smed_v6_3755_0	0.363785	0.650454	1.78802	1.81086	1	GNAQ	Homo sapiens	G protein subunit alpha q	NP_002063.2
dd_Smed_v6_12047_0	0.100187	0.343736	3.43094	1.81081	1
dd_Smed_v6_17564_0	0.0417166	0.281296	6.74302	1.80913	1
dd_Smed_v6_14852_0	0.021903	0.418108	19.0891	1.80884	1	NTN1	Homo sapiens	netrin 1	NP_004813.2
dd_Smed_v6_17359_0	0.050778	0.194594	3.83224	1.80743	1	KCNQ5	Homo sapiens	potassium voltage-gated channel, KQT-like subfamily, member 5	NP_062816.2
dd_Smed_v6_2975_0	0.0263073	0.520709	19.7933	1.80314	1
dd_Smed_v6_90717_0	0.205188	0.425706	2.07471	1.80008	1
dd_Smed_v6_5749_0	0.39645	0.749978	1.89174	1.79739	1
dd_Smed_v6_1029_0	0.344765	0.66721	1.93526	1.7959	1	LOC103190579	Callorhinchus milii	misshapen-like kinase 1	XP_007909604.1
dd_Smed_v6_17617_0	0.0758547	0.339282	4.47279	1.79509	1	POMGNT1	Homo sapiens	protein O-linked mannose N-acetylglucosaminyltransferase 1 (beta 1,2-)	NP_001277058.1
dd_Smed_v6_72786_0	0.10875	0.298118	2.74132	1.79491	1
dd_Smed_v6_16566_0	0.0930648	0.365401	3.92631	1.79395	1	PCDHGA7	Homo sapiens	protocadherin gamma subfamily A, 7	NP_114476.1
dd_Smed_v6_13295_0	0.647781	1.24108	1.91589	1.79017	1	AaeL	Aedes aegypti	AAEL004222-PA	XP_001648695.1
dd_Smed_v6_6445_0	0.0336038	0.352577	10.4922	1.78962	1
dd_Smed_v6_1237_0	1.26499	1.87544	1.48257	1.7854	1	GNG7	Homo sapiens	G protein subunit gamma 7	NP_443079.1
dd_Smed_v6_5781_0	0.109472	0.323473	2.95485	1.78408	1	PDZRN4	Homo sapiens	PDZ domain containing ring finger 4	NP_001158067.1
dd_Smed_v6_2499_0	0.405471	0.724136	1.78591	1.78381	1
dd_Smed_v6_5364_0	0.151216	0.34497	2.2813	1.78254	1	ACLY	Homo sapiens	ATP citrate lyase	NP_001087.2
dd_Smed_v6_760_0	0.0261372	1.21923	46.6475	1.77817	1
dd_Smed_v6_6470_0	0.0977046	0.342927	3.50983	1.77409	1	ANPEP	Homo sapiens	alanyl aminopeptidase, membrane	NP_001141.2
dd_Smed_v6_2574_0	0.0221521	0.667612	30.1376	1.77307	1
dd_Smed_v6_6116_0	0.0966716	0.269115	2.78381	1.76467	1	KCNK3	Homo sapiens	potassium two pore domain channel subfamily K member 3	NP_002237.1
dd_Smed_v6_11363_0	0.0982921	0.268058	2.72716	1.76121	1	LIG4	Homo sapiens	ligase IV, DNA, ATP-dependent	NP_002303.2
dd_Smed_v6_8860_0	0.185449	0.4755	2.56405	1.76048	1	KIF26A	Homo sapiens	kinesin family member 26A	NP_056471.1
dd_Smed_v6_10633_0	0.88317	1.54624	1.75079	1.76042	1	ZNFX1	Homo sapiens	zinc finger NFX1-type containing 1	NP_066363.1
dd_Smed_v6_8696_0	0.152164	0.434961	2.8585	1.75992	1
dd_Smed_v6_36585_0	0.00955894	0.244881	25.618	1.75954	1	LOC101067614	Takifugu rubripes	fucolectin-7-like	XP_003965861.1
dd_Smed_v6_8816_0	0.167597	0.395013	2.35692	1.75841	1	GRIK2	Homo sapiens	glutamate ionotropic receptor kainate type subunit 2	NP_068775.1
dd_Smed_v6_677_0	0.00571732	0.753044	131.713	1.75415	1
dd_Smed_v6_3170_0	0.271271	0.526032	1.93914	1.75079	1	ATP2B3	Homo sapiens	ATPase plasma membrane Ca2 transporting 3	NP_068768.2
dd_Smed_v6_10144_0	1.03407	2.00083	1.93491	1.75034	1	NEK8	Homo sapiens	NIMA related kinase 8	NP_835464.1
dd_Smed_v6_10020_0	0.192634	0.438796	2.27787	1.75014	1	AaeL	Aedes aegypti	neuropeptide f receptor 76f	XP_001658724.1
dd_Smed_v6_13200_0	0.125093	0.297656	2.37947	1.74902	1
dd_Smed_v6_8838_0	0.165081	0.39355	2.38397	1.7478	1	MAP3K12	Homo sapiens	mitogen-activated protein kinase kinase kinase 12	NP_006292.3
dd_Smed_v6_12240_0	0.0800724	0.223569	2.79209	1.73316	1	DPP6	Homo sapiens	dipeptidyl-peptidase 6	NP_001034439.1
dd_Smed_v6_1931_0	0.303639	0.578251	1.9044	1.73284	1
dd_Smed_v6_4536_0	1.17169	1.94218	1.6576	1.72908	1	LUC7L	Homo sapiens	LUC7-like (S. cerevisiae)	NP_060502.1
dd_Smed_v6_4296_0	0.71286	1.437	2.01582	1.72786	1	RBPMS	Homo sapiens	RNA binding protein with multiple splicing	XP_005273447.1
dd_Smed_v6_7863_0	0.188773	0.500218	2.64984	1.72439	1
dd_Smed_v6_3169_0	1.24084	1.82395	1.46993	1.72261	1
dd_Smed_v6_6056_0	0.243727	0.612365	2.51251	1.72228	1	ACAD9	Homo sapiens	acyl-CoA dehydrogenase family member 9	NP_054768.2
dd_Smed_v6_1898_0	0.139657	0.636997	4.56116	1.71841	1
dd_Smed_v6_3881_1	0.203426	0.436363	2.14507	1.71574	1	IscW	Ixodes scapularis	transmembrane protein 184B, putative	XP_002416205.1
dd_Smed_v6_512_0	2.01333	2.86413	1.42258	1.71507	1
dd_Smed_v6_2911_0	0.365398	0.670995	1.83634	1.71381	1	NDRG1	Homo sapiens	N-myc downstream regulated 1	NP_006087.2
dd_Smed_v6_763_0	0.30424	0.561921	1.84697	1.71025	1
dd_Smed_v6_11630_0	0.082384	0.275952	3.34958	1.7092	1	SLC18A3	Homo sapiens	solute carrier family 18 member A3	NP_003046.2
dd_Smed_v6_11969_0	0.20161	0.522231	2.5903	1.70641	1	RAB11FIP3	Homo sapiens	RAB11 family interacting protein 3 (class II)	XP_005255771.1
dd_Smed_v6_2902_0	0.407176	0.683318	1.67819	1.70337	1	PRKAR2A	Homo sapiens	protein kinase cAMP-dependent type II regulatory subunit alpha	NP_004148.1
dd_Smed_v6_15693_0	0.0372964	0.236212	6.33337	1.70291	1
dd_Smed_v6_20466_0	0.116696	0.372075	3.18841	1.70158	1	BRAFLDRAFT	Branchiostoma floridae	hypothetical protein	XP_002587857.1
dd_Smed_v6_2910_0	0.0350607	0.442767	12.6286	1.69888	1
dd_Smed_v6_600_0	0.309197	0.559243	1.8087	1.69316	1	GABARAP	Homo sapiens	GABA type A receptor-associated protein	NP_009209.1
dd_Smed_v6_9826_0	0.105301	0.286928	2.72483	1.69112	1	Bm1	Brugia malayi	L-asparaginase	XP_001901549.1
dd_Smed_v6_495_0	0.685231	1.06996	1.56146	1.68961	1	QDPR	Homo sapiens	quinoid dihydropteridine reductase	NP_000311.2
dd_Smed_v6_2850_0	0.209208	0.556443	2.65976	1.6855	1
dd_Smed_v6_13178_0	0.119555	0.288695	2.41475	1.68039	1	F32B5.7	Caenorhabditis elegans	Protein F32B5.7	NP_491022.2
dd_Smed_v6_15620_0	0.100688	0.298613	2.96572	1.67537	1	KCNN3	Homo sapiens	potassium calcium-activated channel subfamily N member 3	NP_002240.3
dd_Smed_v6_7444_0	0.30676	0.610467	1.99005	1.67501	1	TOB2	Homo sapiens	transducer of ERBB2, 2	NP_057356.1
dd_Smed_v6_2693_0	0.394076	0.681434	1.7292	1.67158	1	CD9	Homo sapiens	CD9 molecule	NP_001760.1
dd_Smed_v6_3811_0	0.396793	0.716211	1.805	1.67078	1	LOC100187307	Ciona intestinalis	chromosome 6 open reading frame 186-like	XP_002125782.1
dd_Smed_v6_6063_0	0.198517	0.460644	2.32042	1.6675	1	SIDT1	Homo sapiens	SID1 transmembrane family, member 1	NP_060169.2
dd_Smed_v6_5007_0	0.229275	0.519014	2.26372	1.66693	1	SLC30A2	Homo sapiens	solute carrier family 30 member 2	NP_001004434.1
dd_Smed_v6_5328_0	0.187501	0.405501	2.16267	1.662	1	UBL3	Homo sapiens	ubiquitin like 3	NP_009037.1
dd_Smed_v6_2529_0	0.214298	0.426472	1.99009	1.66005	1	LOC100118626	Nasonia vitripennis	protein enabled	XP_008208049.1
dd_Smed_v6_3970_0	0.01869	1.27304	68.1132	1.65804	1	CG31221	Drosophila melanogaster	CG31221 gene product from transcript CG31221-RA	NP_732424.1
dd_Smed_v6_10819_0	0.0234452	0.255004	10.8766	1.65489	1
dd_Smed_v6_7841_0	0.138106	0.327758	2.37323	1.65301	1	MGAT5	Homo sapiens	mannosyl (alpha-1,6-)-glycoprotein beta-1,6-N-acetyl-glucosaminyltransferase	NP_002401.1
dd_Smed_v6_10322_0	0.0984827	0.266509	2.70615	1.649	1	LOC100697749	Oreochromis niloticus	neuronal acetylcholine receptor subunit alpha-9-like	XP_005465180.1
dd_Smed_v6_1138_0	0.0132021	0.286042	21.6664	1.64256	1
dd_Smed_v6_10583_0	1.23993	1.95119	1.57363	1.63638	1
dd_Smed_v6_1067_0	0.224913	0.424585	1.88777	1.63011	1	AgaP	Anopheles gambiae str. PEST	AGAP003430-PA	XP_311717.4
dd_Smed_v6_12165_0	0.139201	0.339352	2.43785	1.62895	1
dd_Smed_v6_22256_0	0.413688	0.697799	1.68678	1.62774	1
dd_Smed_v6_2653_0	0.439507	0.753198	1.71373	1.62723	1	SF3A3	Homo sapiens	splicing factor 3a subunit 3	NP_006793.1
dd_Smed_v6_8704_0	0.108213	0.284873	2.63251	1.62394	1
dd_Smed_v6_11832_0	0.316203	0.612494	1.93703	1.62344	1	NRXN1	Homo sapiens	neurexin 1	XP_006712206.1
dd_Smed_v6_9955_0	0.137024	0.333095	2.43092	1.62244	1	NPR2	Homo sapiens	natriuretic peptide receptor 2	XP_005251536.1
dd_Smed_v6_4464_0	0.0883803	0.288491	3.2642	1.62127	1	PRKCA	Homo sapiens	protein kinase C alpha	NP_002728.1
dd_Smed_v6_4520_0	0.0746467	0.215389	2.88544	1.61922	1	MPDZ	Camelus ferus	multiple PDZ domain protein	XP_006191595.1
dd_Smed_v6_6375_0	0.0450907	0.355319	7.88009	1.6173	1
dd_Smed_v6_6033_1	0.104318	0.311686	2.98783	1.61539	1
dd_Smed_v6_7246_0	0.458067	0.750057	1.63744	1.61386	1
dd_Smed_v6_5762_0	0.0200402	0.52359	26.127	1.61106	1
dd_Smed_v6_3146_0	0.256593	0.52316	2.03887	1.60489	1	LOC100377856	Saccoglossus kowalevskii	putative leucine-rich repeat-containing protein DDB_G0290503-like	XP_002730512.2
dd_Smed_v6_6818_0	0.0274158	0.395351	14.4206	1.60207	1
dd_Smed_v6_783_0	0.081209	0.327681	4.03503	1.59981	1
dd_Smed_v6_3767_0	0.105659	0.265037	2.50841	1.59298	1
dd_Smed_v6_1076_0	0.0505023	1.11903	22.1579	1.5929	1
dd_Smed_v6_9410_0	0.315996	0.564666	1.78694	1.58999	1	zgc:175128	Danio rerio	zgc:175128	NP_001107925.1
dd_Smed_v6_3048_0	0.00699849	0.156737	22.3958	1.58161	1
dd_Smed_v6_18000_0	0.434571	0.774034	1.78114	1.58	1	ACA1	Acanthamoeba castellanii str. Neff	Reverse transcriptase	XP_004339617.1
dd_Smed_v6_6493_0	0.00538606	0.434787	80.7246	1.57998	1
dd_Smed_v6_359_0	0.1722	2.26919	13.1777	1.57942	1
dd_Smed_v6_4788_0	0.106884	0.246749	2.30858	1.57689	1	ISCA1	Homo sapiens	iron-sulfur cluster assembly 1	NP_112202.2
dd_Smed_v6_3486_0	0.135775	0.294332	2.1678	1.57605	1	Rbck1	Mus musculus	RanBP-type and C3HC4-type zinc finger containing 1	NP_062679.2
dd_Smed_v6_2004_0	0.369456	0.748867	2.02695	1.57498	1	GOT1	Homo sapiens	glutamic-oxaloacetic transaminase 1, soluble	NP_002070.1
dd_Smed_v6_9607_0	0.123042	0.268885	2.18531	1.57055	1
dd_Smed_v6_6236_0	0.162602	0.430021	2.64462	1.56402	1	ADA	Homo sapiens	adenosine deaminase	NP_000013.2
dd_Smed_v6_6170_0	0.186343	0.438333	2.3523	1.56206	1	OGFR	Homo sapiens	opioid growth factor receptor	NP_031372.2
dd_Smed_v6_406_0	0.364862	0.626619	1.71741	1.55883	1
dd_Smed_v6_9692_0	0.0329532	0.300332	9.1139	1.55741	1	TSPAN6	Columba livia	tetraspanin 6	XP_005500206.1
dd_Smed_v6_7796_0	0.0725565	0.223234	3.07669	1.55522	1
dd_Smed_v6_12275_0	0.27214	0.55634	2.04432	1.55415	1	DTNA	Homo sapiens	dystrobrevin, alpha	NP_001383.2
dd_Smed_v6_9799_0	0.137245	0.337028	2.45568	1.554	1	LOC100533250	Aplysia californica	nicotinic acetylcholine receptor alpha 2 subunit	NP_001191490.1
dd_Smed_v6_10333_0	0.0897504	0.226927	2.52843	1.55225	1	LOC101851072	Aplysia californica	putative transmembrane protein INAFM2	XP_005107620.1
dd_Smed_v6_3662_0	0.183814	0.352626	1.91838	1.55082	1	XRN1	Homo sapiens	5'-3' exoribonuclease 1	NP_001269788.1
dd_Smed_v6_467_0	0.716311	1.08727	1.51788	1.55077	1	MDH1	Homo sapiens	malate dehydrogenase 1	NP_005908.1
dd_Smed_v6_3116_0	0.101226	0.242787	2.39846	1.54949	1	LOC100223824	Taeniopygia guttata	tetraspanin-3-like	XP_002186574.2
dd_Smed_v6_2912_0	3.19899	4.3441	1.35796	1.54848	1	MYH11	Monodelphis domestica	myosin, heavy chain 11, smooth muscle	XP_001365978.1
dd_Smed_v6_337_0	0.0495074	0.424341	8.57126	1.5458	1
dd_Smed_v6_12883_0	0.156178	0.331287	2.12121	1.54453	1	SLC5A7	Homo sapiens	solute carrier family 5 (sodium/choline cotransporter), member 7	NP_068587.1
dd_Smed_v6_4949_0	0.48694	0.815904	1.67557	1.54339	1
dd_Smed_v6_1545_0	0.0224751	0.251318	11.182	1.54204	1
dd_Smed_v6_8259_0	0.0966268	0.291251	3.01419	1.54197	1	PRKG1	Homo sapiens	protein kinase, cGMP-dependent, type I	XP_005270027.1
dd_Smed_v6_8133_0	0.0176809	0.160057	9.05256	1.54185	1
dd_Smed_v6_2926_0	1.90366	2.67597	1.4057	1.54066	1	LENG8	Homo sapiens	leukocyte receptor cluster (LRC) member 8	NP_443157.1
dd_Smed_v6_1219_1	0.79982	1.22366	1.52993	1.5402	1	PLAC8L1	Homo sapiens	PLAC8-like 1	NP_001025040.1
dd_Smed_v6_10391_0	0.104372	0.248592	2.38179	1.53934	1	ADRBK2	Homo sapiens	adrenergic, beta, receptor kinase 2	NP_005151.2
dd_Smed_v6_11154_0	0.741069	1.15039	1.55234	1.53757	1	CpipJ	Culex quinquefasciatus	hypothetical protein	XP_001867418.1
dd_Smed_v6_6193_0	0.0113629	0.182558	16.0662	1.53674	1
dd_Smed_v6_2941_0	0.298114	0.531751	1.78372	1.53665	1	Tm1	Drosophila melanogaster	Tropomyosin 1	NP_001262590.1
dd_Smed_v6_1423_0	0.402473	0.648282	1.61075	1.53254	1	AP2A2	Homo sapiens	adaptor-related protein complex 2, alpha 2 subunit	NP_036437.1
dd_Smed_v6_6674_0	0.120381	0.353234	2.9343	1.53148	1
dd_Smed_v6_8962_0	0.148699	0.317112	2.13258	1.531	1	MAPK13	Homo sapiens	mitogen-activated protein kinase 13	NP_002745.1
dd_Smed_v6_3474_0	0.11813	0.26495	2.24287	1.52907	1	4933425L06Rik	Mus musculus	RIKEN cDNA 4933425L06 gene	NP_080027.1
dd_Smed_v6_2072_0	3.23007	4.7766	1.47879	1.52755	1	Ank3	Mus musculus	ankyrin 3, epithelial	NP_733924.2
dd_Smed_v6_6156_0	0.158209	0.329776	2.08444	1.52719	1	DOCK3	Homo sapiens	dedicator of cytokinesis 3	XP_005264973.1
dd_Smed_v6_911_1	0.291653	0.545755	1.87125	1.52505	1
dd_Smed_v6_10415_0	0.126282	0.416282	3.29646	1.52241	1	PAK1	Homo sapiens	p21 (RAC1) activated kinase 1	NP_001122092.1
dd_Smed_v6_2988_0	0.389859	0.623019	1.59806	1.5215	1	Gpt2	Mus musculus	glutamic pyruvate transaminase (alanine aminotransferase) 2	NP_776291.1
dd_Smed_v6_19123_0	0.195165	0.51481	2.63782	1.5203	1	ACA1	Acanthamoeba castellanii str. Neff	Reverse transcriptase	XP_004339617.1
dd_Smed_v6_1301_0	1.61313	2.22625	1.38008	1.51968	1
dd_Smed_v6_7394_0	0.51646	0.808172	1.56483	1.5178	1	Baz2b	Mus musculus	bromodomain adjacent to zinc finger domain, 2B	XP_006499924.1
dd_Smed_v6_4559_0	0.173936	0.333656	1.91827	1.51566	1	Atp2b1	Mus musculus	ATPase, Ca transporting, plasma membrane 1	XP_006514081.1
dd_Smed_v6_253_0	0.645184	0.960911	1.48936	1.51542	1	ATP6V0C	Homo sapiens	ATPase H transporting V0 subunit c	NP_001685.1
dd_Smed_v6_11067_0	0.305728	0.549307	1.79672	1.51357	1	STK36	Homo sapiens	serine/threonine kinase 36	NP_056505.2
dd_Smed_v6_2452_0	0.138342	0.290933	2.103	1.51352	1	cd63	Stegastes partitus	CD63 molecule	XP_008291891.1
dd_Smed_v6_17981_0	0.0858999	0.443295	5.1606	1.51339	1	TRPM6	Homo sapiens	transient receptor potential cation channel, subfamily M, member 6	NP_060132.3
dd_Smed_v6_10596_0	0.0542222	0.627466	11.5721	1.51182	1
dd_Smed_v6_422_0	0.519325	2.05821	3.96324	1.51145	1	UBB	Homo sapiens	ubiquitin B	NP_061828.1
dd_Smed_v6_9048_0	0.153905	0.342318	2.22421	1.50219	1	DISP1	Homo sapiens	dispatched homolog 1 (Drosophila)	XP_005273393.1
dd_Smed_v6_13075_0	0.160324	0.385654	2.40547	1.50078	1
dd_Smed_v6_7956_0	0.111437	0.237297	2.12943	1.50063	1	PITPNB	Homo sapiens	phosphatidylinositol transfer protein beta	NP_036531.1
dd_Smed_v6_12825_0	0.206361	0.48869	2.36813	1.50056	1	CNGA3	Homo sapiens	cyclic nucleotide gated channel alpha 3	NP_001073347.1
dd_Smed_v6_2116_0	0.0220454	0.143096	6.49098	1.499	1
dd_Smed_v6_6187_0	0.24376	0.50335	2.06494	1.49812	1	ZFYVE20	Homo sapiens	zinc finger, FYVE domain containing 20	NP_071735.2
dd_Smed_v6_8297_0	0.0745712	0.926456	12.4238	1.49794	1
dd_Smed_v6_13697_0	0.115981	0.282815	2.43846	1.49674	1	NRXN1	Homo sapiens	neurexin 1	XP_006712206.1
dd_Smed_v6_1040_0	0.662093	1.03031	1.55614	1.4927	1	CG10527	Drosophila melanogaster	CG10527 gene product from transcript CG10527-RA	NP_611544.1
dd_Smed_v6_6670_0	0.119086	0.289828	2.43378	1.49026	1	DYRK1B	Homo sapiens	dual specificity tyrosine phosphorylation regulated kinase 1B	NP_004705.1
dd_Smed_v6_9011_0	0.149403	0.32623	2.18355	1.48807	1
dd_Smed_v6_1274_0	0.0147135	2.66971	181.446	1.48749	1	Spint3	Mus musculus	serine peptidase inhibitor, Kunitz type, 3	NP_001170872.1
dd_Smed_v6_6584_0	0.307907	0.570694	1.85346	1.48644	1	INPP5F	Homo sapiens	inositol polyphosphate-5-phosphatase F	XP_006717783.1
dd_Smed_v6_6448_0	0.00600562	0.122237	20.3537	1.48288	1
dd_Smed_v6_7305_0	0.0679126	0.285876	4.20947	1.47647	1	Tenc1	Chinchilla lanigera	tensin like C1 domain containing phosphatase (tensin 2)	XP_005397193.1
dd_Smed_v6_10504_0	0.169726	0.361103	2.12756	1.47326	1
dd_Smed_v6_9728_0	0.246376	0.454627	1.84526	1.47105	1
dd_Smed_v6_3221_0	1.30779	1.95441	1.49444	1.47046	1	PLCB4	Homo sapiens	phospholipase C beta 4	NP_000924.3
dd_Smed_v6_34_0	3.12547	4.068	1.30156	1.47041	1	EHEL	Encephalitozoon hellem ATCC 50504	ubiquitin	XP_003886803.1
dd_Smed_v6_679_0	0.144488	0.308994	2.13855	1.46985	1	Nova2	Mus musculus	neuro-oncological ventral antigen 2	NP_001025048.2
dd_Smed_v6_8581_0	0.214587	0.391478	1.82433	1.46958	1	Spag9	Mus musculus	sperm associated antigen 9	XP_006534273.1
dd_Smed_v6_10495_0	0.110221	0.273371	2.48021	1.46725	1	PCDH9	Homo sapiens	protocadherin 9	XP_005266465.1
dd_Smed_v6_5982_0	0.122464	0.262828	2.14616	1.46718	1	TM2D2	Homo sapiens	TM2 domain containing 2	NP_510882.1
dd_Smed_v6_10696_0	0.289721	0.55895	1.92927	1.46561	1	ZNFX1	Homo sapiens	zinc finger NFX1-type containing 1	NP_066363.1
dd_Smed_v6_11296_0	0.22966	0.433282	1.88662	1.46433	1	LOC100162138	Acyrthosiphon pisum	partitioning defective 3 homolog B	XP_008186393.1
dd_Smed_v6_12777_0	0.833444	1.43272	1.71903	1.46379	1
dd_Smed_v6_25_0	0.0279728	0.194587	6.95628	1.46371	1	AgaP	Anopheles gambiae str. PEST	AGAP005941-PA	XP_001688756.1
dd_Smed_v6_12996_0	0.176251	0.343382	1.94826	1.46231	1	beta-Spec	Drosophila melanogaster	beta Spectrin	NP_523388.1
dd_Smed_v6_4017_0	0.216085	0.409767	1.89633	1.46165	1	CYB561	Homo sapiens	cytochrome b561	NP_001906.3
dd_Smed_v6_586_0	0.0108692	1.73862	159.958	1.45787	1
dd_Smed_v6_7201_0	0.365288	0.638767	1.74867	1.45712	1	PI4KA	Homo sapiens	phosphatidylinositol 4-kinase, catalytic, alpha	NP_477352.3
dd_Smed_v6_9190_0	0.679654	1.07126	1.57619	1.45663	1	LOC100641111	Amphimedon queenslandica	protein F37C4.5-like	XP_003383296.1
dd_Smed_v6_1650_0	0.199975	0.357262	1.78653	1.45563	1	Tspan17	Mus musculus	tetraspanin 17	NP_083117.2
dd_Smed_v6_8244_0	0.0745223	0.255158	3.42391	1.4548	1	SLC2A1	Homo sapiens	solute carrier family 2 (facilitated glucose transporter), member 1	NP_006507.2
dd_Smed_v6_2661_0	0.956305	1.48983	1.55791	1.4543	1	DHX58	Geospiza fortis	DEXH (Asp-Glu-X-His) box polypeptide 58	XP_005429686.1
dd_Smed_v6_5915_0	0.235918	0.562032	2.38232	1.45253	1	OTOF	Homo sapiens	otoferlin	NP_919224.1
dd_Smed_v6_10249_0	0.465277	0.790414	1.6988	1.45234	1
dd_Smed_v6_3408_0	0.207409	0.401139	1.93405	1.45108	1	AHCYL2	Homo sapiens	adenosylhomocysteinase-like 2	NP_001124195.1
dd_Smed_v6_3574_2	0.783312	1.10971	1.41668	1.45007	1
dd_Smed_v6_2226_1	0.095737	0.269545	2.81547	1.44776	1	EEF2K	Homo sapiens	eukaryotic elongation factor 2 kinase	NP_037434.1
dd_Smed_v6_10383_0	0.113032	0.253172	2.23982	1.44752	1
dd_Smed_v6_2712_3	0.677525	1.1459	1.6913	1.44673	1	Mrpl2	Mus musculus	mitochondrial ribosomal protein L2	XP_006524432.1
dd_Smed_v6_1955_0	0.41822	1.92216	4.59606	1.44337	1
dd_Smed_v6_14689_0	0.0882231	0.21759	2.46636	1.44004	1
dd_Smed_v6_13997_0	0.200866	0.390214	1.94266	1.43797	1
dd_Smed_v6_15923_0	0.201234	0.402304	1.99918	1.4379	1	Kcnq1	Mus musculus	potassium voltage-gated channel, subfamily Q, member 1	NP_032460.2
dd_Smed_v6_1511_0	0.695566	0.988442	1.42106	1.43744	1	Pkm	Mus musculus	pyruvate kinase, muscle	NP_001240812.1
dd_Smed_v6_4610_1	0.359858	0.679653	1.88867	1.43655	1
dd_Smed_v6_9784_0	1.34733	2.063	1.53118	1.43653	1
dd_Smed_v6_1385_0	0.0319884	1.4288	44.6663	1.43601	1
dd_Smed_v6_10213_0	0.00828855	0.509795	61.5059	1.43575	1
dd_Smed_v6_2160_0	1.33798	2.22195	1.66067	1.43447	1	DNM1	Homo sapiens	dynamin 1	XP_005251821.1
dd_Smed_v6_9434_0	0.227996	0.462312	2.02772	1.43418	1	Kcnip1	Mus musculus	Kv channel-interacting protein 1	NP_081674.2
dd_Smed_v6_8514_0	0.188255	0.505686	2.68618	1.43287	1	LOC102698271	Lepisosteus oculatus	WASP homolog-associated protein with actin, membranes and microtubules-like	XP_006628744.1
dd_Smed_v6_5734_0	0.537587	0.935354	1.73991	1.43104	1	Polg	Mus musculus	polymerase (DNA directed), gamma	XP_006540771.1
dd_Smed_v6_7987_0	0.364799	0.622767	1.70715	1.42805	1	AgaP	Anopheles gambiae str. PEST	AGAP008046-PA	XP_001689033.1
dd_Smed_v6_6314_0	0.058989	1.88005	31.8712	1.42804	1
dd_Smed_v6_11767_0	0.098816	0.255065	2.58121	1.42659	1	NPR1	Homo sapiens	natriuretic peptide receptor 1	NP_000897.3
dd_Smed_v6_11294_0	0.154186	0.345272	2.23932	1.4254	1
dd_Smed_v6_7872_0	0.209873	0.393353	1.87424	1.42275	1	HEATR5B	Homo sapiens	HEAT repeat containing 5B	NP_061897.1
dd_Smed_v6_2241_0	0.281211	0.509921	1.81331	1.42114	1	Rab14	Mus musculus	RAB14, member RAS oncogene family	NP_080973.1
dd_Smed_v6_5939_0	0.611988	1.03329	1.68841	1.41713	1	HIP1	Homo sapiens	huntingtin interacting protein 1	NP_005329.3
dd_Smed_v6_7316_0	0.152452	0.289935	1.90181	1.41675	1	LOC100313655	Saccoglossus kowalevskii	microphthalmia-associated transcription factor	NP_001161587.1
dd_Smed_v6_8593_0	0.175709	0.337811	1.92256	1.41598	1	SCAMP1	Homo sapiens	secretory carrier membrane protein 1	NP_001277158.1
dd_Smed_v6_10828_0	0.255569	0.570946	2.23402	1.41482	1	ARHGAP21	Homo sapiens	Rho GTPase activating protein 21	XP_006717552.1
dd_Smed_v6_25996_0	0.127877	0.335544	2.62395	1.41248	1	LOC100366494	Saccoglossus kowalevskii	lengsin-like	XP_002730900.1
dd_Smed_v6_7977_0	0.258505	0.443331	1.71498	1.41193	1	RAB3C	Homo sapiens	RAB3C, member RAS oncogene family	NP_612462.1
dd_Smed_v6_11999_0	0.00645857	0.335939	52.0145	1.41058	1
dd_Smed_v6_8889_0	0.114154	0.289285	2.53417	1.41018	1	CPEB3	Homo sapiens	cytoplasmic polyadenylation element binding protein 3	XP_006717781.1
dd_Smed_v6_2973_0	0.408228	0.675341	1.65433	1.4092	1	CLTA	Homo sapiens	clathrin light chain A	NP_001824.1
dd_Smed_v6_17743_0	0.104101	0.241772	2.32248	1.40824	1	LOC100908663	Metaseiulus occidentalis	protein turtle-like	XP_003745844.1
dd_Smed_v6_14203_0	0.113658	0.269003	2.36678	1.403	1
dd_Smed_v6_7289_0	0.508965	0.923563	1.81459	1.40293	1
dd_Smed_v6_16040_0	0.253369	0.473836	1.87014	1.40093	1	PGBD3	Homo sapiens	piggyBac transposable element derived 3	NP_736609.2
dd_Smed_v6_11937_0	0.0384709	0.163454	4.24877	1.40024	1
dd_Smed_v6_2691_0	0.225332	0.389963	1.73062	1.39987	1	NARS	Homo sapiens	asparaginyl-tRNA synthetase	NP_004530.1
dd_Smed_v6_11040_0	0.0718328	0.262861	3.65934	1.39763	1	ints10	Danio rerio	integrator complex subunit 10	NP_997804.1
dd_Smed_v6_10066_0	0.192692	0.367706	1.90826	1.39634	1	Evi5	Mus musculus	ecotropic viral integration site 5	XP_006534845.1
dd_Smed_v6_1630_0	1.80727	2.69431	1.49082	1.39548	1	PAS	Komagataella pastoris GS115	signal transducing MEK kinase	XP_002492697.1
dd_Smed_v6_15790_0	0.0315389	0.137891	4.37211	1.39207	1
dd_Smed_v6_2407_0	0.538927	0.863453	1.60217	1.39191	1	CG31195	Drosophila melanogaster	CG31195 gene product from transcript CG31195-RB	NP_732553.2
dd_Smed_v6_4377_0	0.614193	0.973279	1.58464	1.38745	1	4932438A13Rik	Mus musculus	RIKEN cDNA 4932438A13 gene	XP_006535520.1
dd_Smed_v6_4648_0	0.831064	1.89833	2.28422	1.38734	1	DYSF	Homo sapiens	dysferlin	NP_001124449.1
dd_Smed_v6_5478_0	1.38496	1.86326	1.34535	1.38713	1	LOC100378932	Saccoglossus kowalevskii	transcriptional regulator ATRX-like	XP_006823737.1
dd_Smed_v6_8081_0	0.155961	0.319567	2.04902	1.38629	1	LOC101851374	Aplysia californica	BTB/POZ domain-containing protein At5g03250-like	XP_005110255.1
dd_Smed_v6_9710_0	0.151646	0.306908	2.02384	1.38429	1	VAMP1	Homo sapiens	vesicle associated membrane protein 1	NP_055046.1
dd_Smed_v6_13935_0	0.27504	0.668629	2.43102	1.38059	1	LOC101172198	Oryzias latipes	piggyBac transposable element-derived protein 4-like	XP_004079965.1
dd_Smed_v6_9759_0	0.132229	0.535867	4.05256	1.37876	1	BRAFLDRAFT	Branchiostoma floridae	hypothetical protein	XP_002613189.1
dd_Smed_v6_2029_0	0.294471	0.48062	1.63215	1.37736	1	ZFAND5	Homo sapiens	zinc finger AN1-type containing 5	NP_005998.1
dd_Smed_v6_10729_0	0.104403	0.345679	3.311	1.37634	1
dd_Smed_v6_588_0	0.0524588	0.667861	12.7312	1.37462	1
dd_Smed_v6_16417_0	0.230018	0.461366	2.00578	1.37454	1
dd_Smed_v6_4755_0	0.348601	0.582756	1.6717	1.37428	1	NSD1	Homo sapiens	nuclear receptor binding SET domain protein 1	XP_005266019.1
dd_Smed_v6_11814_0	0.428176	0.694384	1.62172	1.37378	1
dd_Smed_v6_2393_0	0.18719	0.357423	1.90942	1.37197	1	PC	Homo sapiens	pyruvate carboxylase	NP_071504.2
dd_Smed_v6_1915_0	0.298359	0.494596	1.65772	1.37056	1	ATG3	Homo sapiens	autophagy related 3	NP_071933.2
dd_Smed_v6_4800_0	0.10206	0.274633	2.6909	1.36965	1	PRKCE	Homo sapiens	protein kinase C epsilon	NP_005391.1
dd_Smed_v6_8769_0	0.0736759	0.265958	3.60983	1.36919	1
dd_Smed_v6_4327_0	0.190962	0.35318	1.84947	1.36819	1	HK2	Homo sapiens	hexokinase 2	NP_000180.2
dd_Smed_v6_1622_0	0.321752	0.565727	1.75827	1.36749	1	ATP6V0B	Homo sapiens	ATPase H transporting V0 subunit b	NP_004038.1
dd_Smed_v6_895_0	0.036537	0.727388	19.9083	1.36589	1
dd_Smed_v6_13587_0	0.112654	0.266306	2.36394	1.36471	1
dd_Smed_v6_7481_0	0.020459	0.828661	40.5034	1.36441	1	KLKB1	Homo sapiens	kallikrein B, plasma (Fletcher factor) 1	NP_000883.2
dd_Smed_v6_5069_0	0.891438	1.68364	1.88868	1.3644	1	Clasp1	Mus musculus	CLIP associating protein 1	NP_001280230.1
dd_Smed_v6_6523_0	0.152298	0.329942	2.16642	1.36291	1
dd_Smed_v6_7917_0	0.387924	0.645822	1.66482	1.36032	1	Atp1b1	Mus musculus	ATPase, Na /K transporting, beta 1 polypeptide	NP_033851.1
dd_Smed_v6_12768_0	0.0753744	0.185814	2.46521	1.35886	1	SOCS7	Homo sapiens	suppressor of cytokine signaling 7	XP_005257322.1
dd_Smed_v6_4890_0	0.505324	1.03798	2.05409	1.35663	1	FAM135A	Homo sapiens	family with sequence similarity 135, member A	XP_005248807.1
dd_Smed_v6_21489_0	0.0897585	0.260571	2.90302	1.35604	1	PCDH1	Homo sapiens	protocadherin 1	NP_002578.2
dd_Smed_v6_3176_0	0.154321	0.302731	1.9617	1.35566	1	TCEA2	Homo sapiens	transcription elongation factor A2	NP_003186.1
dd_Smed_v6_5672_1	0.335698	0.537262	1.60043	1.35488	1	LOC100890026	Strongylocentrotus purpuratus	uncharacterized LOC100890026	XP_003727285.1
dd_Smed_v6_17978_0	0.137677	0.290169	2.10761	1.35008	1
dd_Smed_v6_5399_0	0.120651	0.29029	2.40604	1.34893	1	OXR1	Homo sapiens	oxidation resistance 1	NP_001185464.1
dd_Smed_v6_1891_0	0.179927	0.335018	1.86197	1.34782	1	SNX25	Homo sapiens	sorting nexin 25	NP_114159.2
dd_Smed_v6_4410_0	0.0439665	0.237076	5.39219	1.3473	1
dd_Smed_v6_3353_0	0.12351	0.247007	1.9999	1.34717	1	CMPK1	Homo sapiens	cytidine/uridine monophosphate kinase 1	NP_057392.1
dd_Smed_v6_9989_0	0.153067	0.315601	2.06185	1.34713	1	TRIM9	Homo sapiens	tripartite motif containing 9	NP_055978.4
dd_Smed_v6_8494_0	0.23828	0.442977	1.85906	1.34306	1	Robo1	Mus musculus	roundabout guidance receptor 1	NP_062286.2
dd_Smed_v6_15344_0	0.325593	0.549563	1.68788	1.34236	1
dd_Smed_v6_9601_0	0.0151875	4.05393	266.924	1.33999	1
dd_Smed_v6_11830_0	0.0225369	0.1926	8.54599	1.33867	1	FAM115C	Homo sapiens	family with sequence similarity 115, member C	NP_001123498.2
dd_Smed_v6_21981_0	0.150123	1.61199	10.7378	1.33752	1
dd_Smed_v6_19281_0	0.0635517	0.520676	8.19296	1.33743	1
dd_Smed_v6_3364_0	0.855472	1.25279	1.46444	1.33572	1	NSF	Homo sapiens	N-ethylmaleimide-sensitive factor	NP_006169.2
dd_Smed_v6_3742_0	0.367324	0.658611	1.793	1.33089	1	DDX58	Homo sapiens	DEAD (Asp-Glu-Ala-Asp) box polypeptide 58	NP_055129.2
dd_Smed_v6_5728_0	0.204075	0.387804	1.9003	1.33028	1
dd_Smed_v6_8011_0	0.241229	0.491979	2.03947	1.32837	1	AaeL	Aedes aegypti	golgi-specific brefeldin a-resistance factor	XP_001653922.1
dd_Smed_v6_8655_0	0.780819	1.3335	1.70782	1.32484	1	SPON1	Homo sapiens	spondin 1	NP_006099.2
dd_Smed_v6_2493_0	0.203321	0.382116	1.87938	1.32428	1	EML1	Homo sapiens	echinoderm microtubule associated protein like 1	NP_004425.2
dd_Smed_v6_18119_0	0.12498	0.263925	2.11174	1.31988	1
dd_Smed_v6_9105_0	0.234277	0.864294	3.68919	1.31857	1
dd_Smed_v6_2090_0	0.687024	1.05594	1.53698	1.31737	1
dd_Smed_v6_13321_0	0.0928719	0.273385	2.94367	1.31688	1	LOC100166494	Acyrthosiphon pisum	uncharacterized LOC100166494	XP_001945302.2
dd_Smed_v6_11605_0	0.14946	0.278729	1.86491	1.315	1	PCDH11X	Homo sapiens	protocadherin 11 X-linked	NP_001161833.1
dd_Smed_v6_7017_0	0.137211	0.260818	1.90085	1.31338	1	LOC102724788	Homo sapiens	proline dehydrogenase 1, mitochondrial	XP_006724998.1
dd_Smed_v6_26861_0	0.112426	0.265552	2.36203	1.31265	1	Kcnc2	Mus musculus	potassium voltage gated channel, Shaw-related subfamily, member 2	XP_006513754.1
dd_Smed_v6_3524_0	0.0499771	1.22859	24.5831	1.31248	1
dd_Smed_v6_6710_0	0.155051	0.314629	2.0292	1.31199	1	CG31221	Drosophila melanogaster	CG31221 gene product from transcript CG31221-RA	NP_732424.1
dd_Smed_v6_4083_0	0.802932	1.59733	1.98938	1.31025	1	BRAP	Homo sapiens	BRCA1 associated protein	NP_006759.3
dd_Smed_v6_6700_0	0.273128	0.468562	1.71554	1.30691	1
dd_Smed_v6_3898_0	0.478522	0.723205	1.51133	1.30478	1	CG6329	Drosophila melanogaster	CG6329 gene product from transcript CG6329-RE	NP_610904.1
dd_Smed_v6_12579_0	0.247942	0.578364	2.33266	1.30087	1	Dgkz	Mus musculus	diacylglycerol kinase zeta	NP_612179.2
dd_Smed_v6_3876_0	0.1788	0.344255	1.92536	1.3001	1	LOC100876933	Megachile rotundata	single-stranded DNA-binding protein 3-like	XP_003699942.1
dd_Smed_v6_6976_0	0.252701	0.440597	1.74355	1.29891	1	PDE2A	Homo sapiens	phosphodiesterase 2A	NP_002590.1
dd_Smed_v6_5084_0	0.158392	0.31954	2.01739	1.29793	1	CG8786	Drosophila melanogaster	CG8786 gene product from transcript CG8786-RG	NP_649138.2
dd_Smed_v6_9503_0	0.2755	0.462822	1.67993	1.29171	1	CHRNA4	Homo sapiens	cholinergic receptor nicotinic alpha 4 subunit	NP_000735.1
dd_Smed_v6_6631_0	0.245373	0.433399	1.76629	1.29156	1	EPC1	Homo sapiens	enhancer of polycomb homolog 1 (Drosophila)	NP_001258933.1
dd_Smed_v6_11403_0	0.109677	0.228253	2.08115	1.28987	1
dd_Smed_v6_12999_0	0.13619	0.27668	2.03157	1.28928	1	AaeL	Aedes aegypti	sodium-bile acid cotransporter	XP_001662576.1
dd_Smed_v6_3083_0	0.241974	0.414187	1.7117	1.28642	1
dd_Smed_v6_474_0	4.8723	6.40101	1.31376	1.28641	1
dd_Smed_v6_15437_0	0.185429	0.347941	1.87641	1.28429	1	RIMS2	Homo sapiens	regulating synaptic membrane exocytosis 2	XP_006716761.1
dd_Smed_v6_3944_0	0.0815058	0.213692	2.6218	1.27831	1	CG30419	Drosophila melanogaster	CG30419 gene product from transcript CG30419-RA	NP_611899.1
dd_Smed_v6_758_0	0.415232	0.628239	1.51298	1.27712	1	AgaP	Anopheles gambiae str. PEST	AGAP010206-PA	XP_554113.3
dd_Smed_v6_6600_0	1.77215	2.64606	1.49313	1.27688	1	Unc79	Mus musculus	unc-79 homolog (C. elegans)	XP_006515814.1
dd_Smed_v6_3525_0	0.257173	0.462673	1.79907	1.27597	1
dd_Smed_v6_9436_0	0.178404	0.336425	1.88575	1.27532	1	AMPD2	Homo sapiens	adenosine monophosphate deaminase 2	NP_631895.1
dd_Smed_v6_7827_0	0.133622	0.253123	1.89432	1.27381	1	TBC1D14	Homo sapiens	TBC1 domain family member 14	NP_001273734.1
dd_Smed_v6_13343_0	0.0249632	0.386105	15.467	1.2737	1	LHX2	Tupaia chinensis	LIM homeobox 2	XP_006158289.1
dd_Smed_v6_8154_0	0.10591	0.23497	2.21859	1.27263	1	GAS2L1	Homo sapiens	growth arrest specific 2 like 1	NP_001265659.1
dd_Smed_v6_541_0	0.344936	9.58042	27.7745	1.27225	1
dd_Smed_v6_2405_0	0.191634	0.350818	1.83067	1.27214	1	FUM-1	Micromonas commoda	putative fumarate hydratase class1-malate <=> fumarate H(2)O	XP_002501905.1
dd_Smed_v6_2980_0	0.0592235	0.847397	14.3084	1.27187	1
dd_Smed_v6_3493_0	0.390004	0.580966	1.48964	1.27175	1
dd_Smed_v6_3404_1	1.39797	1.88391	1.34761	1.27016	1	AKAP17A	Homo sapiens	A-kinase anchoring protein 17A	NP_005079.2
dd_Smed_v6_14700_0	0.193385	0.373725	1.93254	1.26843	1	Cdep	Drosophila melanogaster	Chondrocyte-derived ezrin-like domain containing protein ortholog (H. sapiens)	NP_649505.1
dd_Smed_v6_9230_0	0.155689	0.323459	2.07759	1.26543	1	FRMD5	Homo sapiens	FERM domain containing 5	XP_005254787.1
dd_Smed_v6_6029_0	0.00531195	0.185654	34.9503	1.26494	1
dd_Smed_v6_6420_0	0.151715	0.277407	1.82847	1.26358	1	Pim2	Mus musculus	proviral integration site 2	NP_613072.1
dd_Smed_v6_4798_0	0.597076	0.90251	1.51155	1.26347	1
dd_Smed_v6_7403_0	0.176393	0.313721	1.77853	1.26277	1	nfia	Danio rerio	nuclear factor I/A	XP_005161768.1
dd_Smed_v6_2641_0	0.30578	0.508805	1.66396	1.26142	1	SEPT7	Homo sapiens	septin 7	NP_001779.3
dd_Smed_v6_13873_0	0.14026	0.279144	1.99019	1.26123	1	CPNE9	Homo sapiens	copine family member 9	NP_705899.2
dd_Smed_v6_3483_0	0.152735	0.324427	2.12411	1.26122	1
dd_Smed_v6_1620_0	0.12877	0.365964	2.84199	1.26001	1	ULK2	Homo sapiens	unc-51 like autophagy activating kinase 2	XP_006721669.1
dd_Smed_v6_10954_0	0.156405	0.289281	1.84956	1.25984	1
dd_Smed_v6_22779_0	0.0975398	0.315936	3.23904	1.25869	1
dd_Smed_v6_4861_0	0.103324	0.249226	2.41207	1.2582	1	QPCT	Homo sapiens	glutaminyl-peptide cyclotransferase	NP_036545.1
dd_Smed_v6_9453_0	0.125427	0.294705	2.34962	1.25771	1	NPR1	Homo sapiens	natriuretic peptide receptor 1	NP_000897.3
dd_Smed_v6_8486_0	0.14577	0.291697	2.00107	1.25568	1	CHRNA9	Homo sapiens	cholinergic receptor nicotinic alpha 9 subunit	NP_060051.2
dd_Smed_v6_2370_0	0.0467418	0.361982	7.7443	1.25513	1
dd_Smed_v6_13241_0	0.131955	0.275971	2.09141	1.25485	1	IscW	Ixodes scapularis	reverse transcriptase, putative	XP_002404957.1
dd_Smed_v6_6432_0	0.876226	1.27135	1.45094	1.25349	1	Dsec	Drosophila sechellia	GM22122 gene product from transcript GM22122-RA	XP_002040843.1
dd_Smed_v6_11268_0	0.148789	0.296847	1.99509	1.25319	1
dd_Smed_v6_4406_0	0.20248	0.349966	1.72839	1.25058	1	VAPA	Homo sapiens	VAMP associated protein A	NP_919415.2
dd_Smed_v6_5852_0	0.0339525	0.477685	14.0692	1.25019	1	TMPRSS2	Homo sapiens	transmembrane protease, serine 2	XP_005261101.1
dd_Smed_v6_18739_0	0.110396	0.230912	2.09166	1.24987	1
dd_Smed_v6_4550_0	0.148344	0.287108	1.93543	1.24959	1	VPS18	Homo sapiens	VPS18, CORVET/HOPS core subunit	NP_065908.1
dd_Smed_v6_10116_0	0.293087	0.528605	1.80357	1.24743	1	SHANK3	Homo sapiens	SH3 and multiple ankyrin repeat domains 3	NP_277052.1
dd_Smed_v6_7598_0	0.162999	0.288426	1.7695	1.24613	1	Acaca	Mus musculus	acetyl-Coenzyme A carboxylase alpha	XP_006532014.1
dd_Smed_v6_8247_0	0.340892	0.748866	2.19678	1.24343	1
dd_Smed_v6_11155_0	0.466813	0.753197	1.61349	1.24128	1	CBG15913	Caenorhabditis briggsae	Hypothetical protein CBG15913	XP_002638251.1
dd_Smed_v6_6331_0	0.158668	0.311708	1.96452	1.24077	1	PORCN	Homo sapiens	porcupine homolog (Drosophila)	NP_001269096.1
dd_Smed_v6_4799_0	0.696963	1.1162	1.60152	1.23999	1	WAPAL	Homo sapiens	wings apart-like homolog (Drosophila)	NP_055860.1
dd_Smed_v6_16822_0	0.224374	0.423629	1.88805	1.23949	1	CACNA1H	Homo sapiens	calcium channel, voltage-dependent, T type, alpha 1H subunit	NP_001005407.1
dd_Smed_v6_8507_0	0.259185	0.440706	1.70035	1.23946	1	GCC2	Homo sapiens	GRIP and coiled-coil domain containing 2	XP_006712933.1
dd_Smed_v6_6522_0	0.0893413	0.177662	1.98858	1.23718	1
dd_Smed_v6_1871_0	0.225435	0.384457	1.7054	1.23451	1	Dmoj	Drosophila mojavensis	GI11945 gene product from transcript GI11945-RA	XP_002012399.1
dd_Smed_v6_876_0	0.934984	1.35059	1.4445	1.23356	1	TLN1	Homo sapiens	talin 1	NP_006280.3
dd_Smed_v6_8502_0	0.20352	0.36347	1.78592	1.23172	1	DICER1	Homo sapiens	dicer 1, ribonuclease type III	NP_085124.2
dd_Smed_v6_1742_0	0.289379	0.4611	1.59342	1.22862	1	gpmA	Dictyostelium discoideum AX4	phosphoglycerate mutase	XP_638289.1
dd_Smed_v6_3000_0	0.146667	0.274703	1.87298	1.22736	1
dd_Smed_v6_4591_0	0.348278	0.602776	1.73073	1.22628	1	GGT1	Homo sapiens	gamma-glutamyltransferase 1	NP_038347.2
dd_Smed_v6_12245_0	0.101667	0.282263	2.77633	1.22486	1
dd_Smed_v6_8148_0	0.163245	0.355975	2.18062	1.22472	1
dd_Smed_v6_3503_0	0.240527	0.419759	1.74516	1.22211	1	PGM1	Homo sapiens	phosphoglucomutase 1	NP_002624.2
dd_Smed_v6_10214_0	0.282389	0.533667	1.88983	1.22093	1
dd_Smed_v6_7836_0	0.23538	0.384632	1.63409	1.21914	1
dd_Smed_v6_3047_0	0.14819	0.27442	1.8518	1.21871	1	Imp	Drosophila melanogaster	IGF-II mRNA-binding protein	NP_511111.1
dd_Smed_v6_9276_0	0.140198	0.282229	2.01308	1.21667	1	PDE4D	Bos mutus	phosphodiesterase 4D, cAMP-specific	XP_005889112.1
dd_Smed_v6_2994_0	0.650832	0.879315	1.35106	1.21588	1	SNRPD2	Homo sapiens	small nuclear ribonucleoprotein D2 polypeptide	NP_004588.1
dd_Smed_v6_1615_0	0.320554	0.47733	1.48908	1.21501	1	GNB4	Homo sapiens	G protein subunit beta 4	NP_067642.1
dd_Smed_v6_5746_0	0.325492	0.51336	1.57718	1.21268	1	STOML3	Homo sapiens	stomatin (EPB72)-like 3	NP_660329.1
dd_Smed_v6_2618_0	0.208637	0.362159	1.73583	1.21196	1	NAV2	Homo sapiens	neuron navigator 2	XP_005253271.1
dd_Smed_v6_1902_0	0.024547	2.97018	121	1.20815	1
dd_Smed_v6_7031_0	0.682008	1.01528	1.48866	1.20797	1
dd_Smed_v6_1697_0	0.41872	0.633037	1.51184	1.20789	1	LOC100872156	Apis florea	ubiquitin	XP_003699040.1
dd_Smed_v6_4795_0	0.18471	0.357589	1.93595	1.20704	1	NFX1	Homo sapiens	nuclear transcription factor, X-box binding 1	XP_005251530.1
dd_Smed_v6_10421_0	0.120642	0.229494	1.90227	1.2067	1	CG13101	Drosophila melanogaster	CG13101 gene product from transcript CG13101-RB	NP_609264.1
dd_Smed_v6_5737_0	0.170625	0.322499	1.89011	1.20604	1
dd_Smed_v6_4375_0	0.120361	0.22876	1.90062	1.20491	1	LOC100203263	Hydra vulgaris	HIG1 domain family member 2A, mitochondrial-like	XP_002166360.1
dd_Smed_v6_7893_0	0.13793	0.287217	2.08234	1.20481	1
dd_Smed_v6_4640_0	0.036726	0.297178	8.09176	1.20391	1
dd_Smed_v6_2324_0	0.276788	0.461122	1.66597	1.20318	1	Hyou1	Mus musculus	hypoxia up-regulated 1	XP_006510025.1
dd_Smed_v6_4279_0	0.31759	0.680039	2.14125	1.20083	1
dd_Smed_v6_2507_0	0.0938575	0.19941	2.1246	1.1991	1	Bm1	Brugia malayi	PAP2 superfamily protein	XP_001895537.1
dd_Smed_v6_13765_0	0.126531	0.235955	1.8648	1.19823	1	RILPL1	Homo sapiens	Rab interacting lysosomal protein-like 1	NP_847884.2
dd_Smed_v6_9714_0	0.604137	0.873337	1.44559	1.19723	1
dd_Smed_v6_5431_0	0.306931	0.499679	1.62798	1.195	1
dd_Smed_v6_8526_0	0.455045	0.771031	1.6944	1.19034	1	MAP3K3	Homo sapiens	mitogen-activated protein kinase kinase kinase 3	XP_006721972.1
dd_Smed_v6_11149_0	0.243865	0.39601	1.62389	1.18691	1	TAF1	Homo sapiens	TAF1 RNA polymerase II, TATA box binding protein (TBP)-associated factor, 250kDa	NP_620278.1
dd_Smed_v6_7931_0	0.443989	0.69522	1.56585	1.18671	1
dd_Smed_v6_4931_0	0.31943	0.529709	1.6583	1.18572	1	OSBP2	Homo sapiens	oxysterol binding protein 2	NP_001269671.1
dd_Smed_v6_6288_0	0.153603	0.273464	1.78033	1.18407	1	Traf2	Mus musculus	TNF receptor-associated factor 2	NP_033448.2
dd_Smed_v6_11725_0	0.279346	0.443494	1.58762	1.18031	1	CADPS	Homo sapiens	Ca -dependent secretion activator	NP_003707.2
dd_Smed_v6_5249_0	0.0804798	0.680371	8.45393	1.17911	1
dd_Smed_v6_8686_0	0.0830116	0.483257	5.82155	1.17909	1
dd_Smed_v6_10719_0	0.420377	0.842933	2.00518	1.17792	1	Dper	Drosophila persimilis	GL18982 gene product from transcript GL18982-RA	XP_002014379.1
dd_Smed_v6_11656_0	0.188208	0.333193	1.77034	1.1745	1
dd_Smed_v6_6590_0	0.298943	0.46834	1.56665	1.17397	1	Asap	Drosophila melanogaster	ArfGAP with SH3 domain, ankyrin repeat and PH domain	NP_001163085.1
dd_Smed_v6_3469_0	0.378303	0.59284	1.56711	1.1735	1	hts	Drosophila melanogaster	hu li tai shao	NP_725889.1
dd_Smed_v6_3088_0	0.142482	0.269406	1.8908	1.17212	1	BTAF1	Homo sapiens	B-TFIID TATA-box binding protein associated factor 1	XP_005270323.1
dd_Smed_v6_947_0	0.310251	0.47054	1.51664	1.17159	1	CNBP	Homo sapiens	CCHC-type zinc finger nucleic acid binding protein	NP_001120664.1
dd_Smed_v6_11282_0	0.25014	0.473128	1.89145	1.17158	1
dd_Smed_v6_4783_0	5.15698	8.55614	1.65914	1.17127	1	LOC100373522	Saccoglossus kowalevskii	probable serine/threonine-protein kinase kinX-like	XP_006818977.1
dd_Smed_v6_12228_0	0.347194	0.56919	1.6394	1.1707	1	LOC100198531	Hydra vulgaris	centrosomal protein of 164 kDa-like	XP_002155639.2
dd_Smed_v6_10827_0	0.184454	0.352628	1.91174	1.16963	1	CPC735	Coccidioides posadasii C735 delta SOWgp	elongation factor, putative	XP_003065937.1
dd_Smed_v6_7356_0	0.145477	0.280379	1.9273	1.16288	1	CAMSAP1	Homo sapiens	calmodulin regulated spectrin-associated protein 1	XP_005263454.1
dd_Smed_v6_7632_0	0.239723	0.40798	1.70188	1.16165	1	Dana	Drosophila ananassae	GF13551 gene product from transcript GF13551-RA	XP_001960805.1
dd_Smed_v6_4610_0	0.235082	0.437558	1.8613	1.16151	1
dd_Smed_v6_4637_0	0.293097	0.549181	1.87372	1.16121	1
dd_Smed_v6_992_0	0.350605	0.585577	1.67019	1.16116	1	SPCS1	Homo sapiens	signal peptidase complex subunit 1 homolog (S. cerevisiae)	NP_054760.3
dd_Smed_v6_1337_0	0.493521	0.699118	1.41659	1.1598	1	SKP1	Homo sapiens	S-phase kinase-associated protein 1	NP_733779.1
dd_Smed_v6_3391_0	0.486163	0.712334	1.46522	1.15854	1	LOC101074785	Takifugu rubripes	nephrin-like	XP_003966131.1
dd_Smed_v6_2723_0	0.0575216	1.59977	27.8116	1.15418	1
dd_Smed_v6_9463_0	0.198031	0.369488	1.86581	1.15369	1	ARID2	Homo sapiens	AT-rich interaction domain 2	NP_689854.2
dd_Smed_v6_5482_0	0.27507	0.439486	1.59772	1.15179	1	SRGAP3	Homo sapiens	SLIT-ROBO Rho GTPase activating protein 3	XP_005265679.1
dd_Smed_v6_7133_0	0.411419	0.645946	1.57005	1.15176	1	mapta	Danio rerio	microtubule-associated protein tau a	XP_001340566.4
dd_Smed_v6_11349_0	0.713345	1.11335	1.56075	1.15104	1	CELF2	Homo sapiens	CUGBP, Elav-like family member 2	XP_006717434.1
dd_Smed_v6_1263_0	0.147792	0.265139	1.794	1.15014	1	ACTR1A	Homo sapiens	ARP1 actin-related protein 1 homolog A, centractin alpha (yeast)	NP_005727.1
dd_Smed_v6_1050_0	0.232162	0.371195	1.59886	1.14966	1	RAC2	Homo sapiens	ras-related C3 botulinum toxin substrate 2 (rho family, small GTP binding protein Rac2)	NP_002863.1
dd_Smed_v6_1248_0	0.24278	3.91061	16.1077	1.14791	1
dd_Smed_v6_339_0	0.10902	0.224805	2.06207	1.14671	1
dd_Smed_v6_7409_0	0.264352	0.405687	1.53465	1.14651	1	LOC101073438	Takifugu rubripes	nuclear receptor coactivator 4-like	XP_003963979.1
dd_Smed_v6_2724_0	0.173095	0.284386	1.64295	1.14583	1	BSDC1	Homo sapiens	BSD domain containing 1	NP_060515.3
dd_Smed_v6_5562_0	0.049032	0.391242	7.97932	1.14544	1
dd_Smed_v6_3128_1	0.127152	0.242717	1.90887	1.14464	1	Unk	Mus musculus	unkempt family zinc finger	XP_006533154.1
dd_Smed_v6_4734_0	0.48834	0.703133	1.43984	1.14461	1	WNK1	Homo sapiens	WNK lysine deficient protein kinase 1	NP_061852.3
dd_Smed_v6_20805_0	0.153557	0.289333	1.88421	1.14385	1	IscW	Ixodes scapularis	hypothetical protein	XP_002416346.1
dd_Smed_v6_2416_0	0.174436	0.300886	1.72491	1.14377	1	EDC4	Homo sapiens	enhancer of mRNA decapping 4	NP_055144.3
dd_Smed_v6_6116_1	0.205448	0.364738	1.77533	1.1432	1	BTBD10	Homo sapiens	BTB domain containing 10	NP_001284670.1
dd_Smed_v6_7966_0	0.152516	1.77027	11.6071	1.14077	1	TMPRSS9	Homo sapiens	transmembrane protease, serine 9	NP_892018.1
dd_Smed_v6_10030_0	0.447859	0.792842	1.77029	1.13879	1	Dvir	Drosophila virilis	GJ19632 gene product from transcript GJ19632-RA	XP_002052879.1
dd_Smed_v6_5756_0	0.00643316	0.38717	60.1836	1.1378	1
dd_Smed_v6_5351_0	0.204262	0.354852	1.73724	1.13509	1	LOC100635600	Amphimedon queenslandica	monocarboxylate transporter 9-like	XP_003384210.1
dd_Smed_v6_2253_0	0.227718	0.390624	1.71539	1.1323	1	LIN37	Homo sapiens	lin-37 DREAM MuvB core complex component	NP_061977.1
dd_Smed_v6_15741_0	0.106518	0.214825	2.01679	1.12995	1
dd_Smed_v6_4267_0	0.633996	1.04046	1.64111	1.1279	1	GRIK3	Homo sapiens	glutamate ionotropic receptor kainate type subunit 3	NP_000822.2
dd_Smed_v6_17904_0	0.131686	0.226627	1.72096	1.12743	1	LOC100498085	Xenopus tropicalis	zinc finger MYM-type protein 1-like	XP_002943657.1
dd_Smed_v6_1746_0	0.0123875	0.41973	33.8834	1.12723	1
dd_Smed_v6_8258_0	0.388735	0.609586	1.56813	1.12604	1
dd_Smed_v6_5682_0	0.311063	0.481646	1.54839	1.12585	1	LOC100533321	Aplysia californica	NMDA-type glutamate receptor	NP_001191411.1
dd_Smed_v6_2558_0	0.210625	0.365881	1.73712	1.12583	1
dd_Smed_v6_8858_0	0.0485251	0.260579	5.36999	1.12483	1	LOC101353095	Trichechus manatus latirostris	zinc finger protein 699-like	XP_004388040.1
dd_Smed_v6_1184_0	0.790472	1.07837	1.36421	1.12473	1	GNB4	Homo sapiens	G protein subunit beta 4	NP_067642.1
dd_Smed_v6_10486_0	0.131084	0.232751	1.77559	1.12428	1
dd_Smed_v6_6644_0	0.293821	0.468812	1.59557	1.12372	1	Usp50	Mus musculus	ubiquitin specific peptidase 50	NP_083439.2
dd_Smed_v6_17002_0	0.209208	0.337729	1.61432	1.12353	1	LOC101942473	Chrysemys picta bellii	putative golgin subfamily A member 6C	XP_005295324.1
dd_Smed_v6_6841_0	0.121654	0.237561	1.95275	1.12315	1	USP32	Homo sapiens	ubiquitin specific peptidase 32	NP_115971.2
dd_Smed_v6_3633_0	0.147975	0.270264	1.82641	1.12285	1
dd_Smed_v6_5929_0	0.287517	0.43174	1.50162	1.12163	1	GRK6	Homo sapiens	G protein-coupled receptor kinase 6	NP_001004105.1
dd_Smed_v6_11804_0	0.183445	0.34215	1.86514	1.12155	1
dd_Smed_v6_5143_0	0.17122	0.294289	1.71877	1.11939	1	AgaP	Anopheles gambiae str. PEST	AGAP013468-PA	XP_003436497.1
dd_Smed_v6_2251_0	1.36096	1.7774	1.30599	1.11928	1	PRPF4B	Homo sapiens	pre-mRNA processing factor 4B	NP_003904.3
dd_Smed_v6_11177_0	0.113667	0.263065	2.31435	1.11912	1	TTBK1	Homo sapiens	tau tubulin kinase 1	XP_006715292.1
dd_Smed_v6_5875_0	0.170262	0.28933	1.69932	1.11712	1
dd_Smed_v6_1178_0	0.436865	1.4137	3.23602	1.11662	1
dd_Smed_v6_6383_0	0.398302	0.567895	1.42579	1.11512	1	EIF4G2	Homo sapiens	eukaryotic translation initiation factor 4 gamma 2	NP_001036024.3
dd_Smed_v6_3410_0	0.165918	0.291896	1.75928	1.11444	1	MAX	Homo sapiens	MYC associated factor X	NP_660087.1
dd_Smed_v6_6514_0	0.504027	0.74801	1.48407	1.11292	1	CG16718	Drosophila melanogaster	CG16718 gene product from transcript CG16718-RA	NP_732439.1
dd_Smed_v6_275_0	0.292887	0.431583	1.47355	1.11223	1
dd_Smed_v6_9578_0	0.0406788	0.129295	3.17844	1.11038	1	ERI1	Homo sapiens	exoribonuclease 1	NP_699163.2
dd_Smed_v6_8075_0	0.137116	0.281625	2.05392	1.10983	1	COL5A2	Homo sapiens	collagen, type V, alpha 2	NP_000384.2
dd_Smed_v6_4882_0	0.391527	0.624895	1.59605	1.10973	1	FARS2	Homo sapiens	phenylalanyl-tRNA synthetase 2, mitochondrial	NP_006558.1
dd_Smed_v6_5990_0	0.15501	0.265263	1.71126	1.10891	1	Csp	Drosophila melanogaster	Cysteine string protein	NP_524213.1
dd_Smed_v6_2538_0	0.135178	0.24503	1.81264	1.10552	1	PRKAA2	Homo sapiens	protein kinase AMP-activated catalytic subunit alpha 2	NP_006243.2
dd_Smed_v6_17373_0	0.0973911	0.215171	2.20935	1.10422	1
dd_Smed_v6_9631_0	0.30511	0.470078	1.54069	1.10417	1	DGKQ	Homo sapiens	diacylglycerol kinase, theta 110kDa	NP_001338.2
dd_Smed_v6_5172_0	0.164848	0.286631	1.73876	1.10381	1	ASPSCR1	Homo sapiens	alveolar soft part sarcoma chromosome region, candidate 1	NP_076988.1
dd_Smed_v6_7073_0	0.102767	0.210874	2.05196	1.10368	1
dd_Smed_v6_4174_0	0.560638	0.815669	1.45489	1.10311	1
dd_Smed_v6_5004_0	0.0617161	0.20233	3.27839	1.09843	1	RNF185	Homo sapiens	ring finger protein 185	NP_689480.2
dd_Smed_v6_17226_0	0.21077	0.367978	1.74588	1.09843	1	CELF5	Homo sapiens	CUGBP, Elav-like family member 5	XP_006722897.1
dd_Smed_v6_1853_0	0.138072	0.234642	1.69942	1.0981	1	Dvir	Drosophila virilis	GJ18186 gene product from transcript GJ18186-RA	XP_002059289.1
dd_Smed_v6_8308_0	0.147647	0.251512	1.70347	1.09756	1	Exoc4	Mus musculus	exocyst complex component 4	NP_033174.2
dd_Smed_v6_6127_0	0.75556	1.01007	1.33685	1.0957	1	C1orf158	Homo sapiens	chromosome 1 open reading frame 158	NP_689503.3
dd_Smed_v6_1837_0	0.0690068	0.309524	4.48541	1.09555	1
dd_Smed_v6_10530_0	0.215571	0.364298	1.68992	1.09504	1
dd_Smed_v6_3540_0	0.654509	1.00411	1.53414	1.09494	1	CDK11B	Homo sapiens	cyclin-dependent kinase 11B	NP_277022.1
dd_Smed_v6_11891_0	0.150955	0.275524	1.8252	1.09493	1	Map3k15	Mus musculus	mitogen-activated protein kinase kinase kinase 15	NP_001156557.2
dd_Smed_v6_7450_0	0.130882	0.267641	2.0449	1.09172	1	LOC100709282	Oreochromis niloticus	ranBP-type and C3HC4-type zinc finger-containing protein 1-like	XP_003456132.1
dd_Smed_v6_1035_1	0.332103	0.509073	1.53287	1.08926	1	CBL	Homo sapiens	Cbl proto-oncogene	NP_005179.2
dd_Smed_v6_3315_0	0.205448	0.333709	1.6243	1.08903	1	NOMO2	Homo sapiens	NODAL modulator 2	NP_775885.1
dd_Smed_v6_2498_0	0.191503	0.303832	1.58657	1.08873	1	CELE	Caenorhabditis elegans	Protein Y41E3.7	NP_001041027.1
dd_Smed_v6_6610_0	0.319284	0.510297	1.59825	1.08824	1
dd_Smed_v6_22501_0	0.159764	0.26828	1.67923	1.08782	1	ZBED5	Homo sapiens	zinc finger BED-type containing 5	NP_067034.2
dd_Smed_v6_5051_0	0.229429	0.380304	1.65761	1.08697	1	ALKBH3	Homo sapiens	alkB, alkylation repair homolog 3 (E. coli)	NP_631917.1
dd_Smed_v6_14669_0	0.106894	0.246178	2.30301	1.08689	1
dd_Smed_v6_16434_0	0.125808	0.24275	1.92953	1.08669	1	PRKG1	Homo sapiens	protein kinase, cGMP-dependent, type I	NP_006249.1
dd_Smed_v6_1432_0	1.54981	2.26058	1.45862	1.08409	1	ANK3	Homo sapiens	ankyrin 3, node of Ranvier (ankyrin G)	NP_001191332.1
dd_Smed_v6_13272_0	0.00777385	0.0948079	12.1957	1.08388	1
dd_Smed_v6_5278_0	0.133353	0.360363	2.70233	1.08376	1	COG1	Homo sapiens	component of oligomeric golgi complex 1	NP_061184.1
dd_Smed_v6_10965_0	0.111085	0.210941	1.89892	1.08343	1	KIF16B	Homo sapiens	kinesin family member 16B	XP_006723651.1
dd_Smed_v6_25682_0	0.160907	0.264238	1.64218	1.08205	1	LOC100168850	Acyrthosiphon pisum	glutathione S-transferase-like	NP_001280393.1
dd_Smed_v6_2239_0	0.148652	0.259528	1.74588	1.08198	1	PTP4A3	Homo sapiens	protein tyrosine phosphatase type IVA, member 3	NP_116000.1
dd_Smed_v6_4065_0	0.33677	0.498325	1.47972	1.08191	1	DCTN1	Homo sapiens	dynactin subunit 1	NP_001128512.1
dd_Smed_v6_11839_0	0.14591	0.288055	1.9742	1.08129	1	CHRNA3	Homo sapiens	cholinergic receptor nicotinic alpha 3 subunit	XP_006720445.1
dd_Smed_v6_6913_0	0.1129	0.201373	1.78364	1.07879	1	RNF11	Homo sapiens	ring finger protein 11	NP_055187.1
dd_Smed_v6_2451_0	0.385965	0.624604	1.61829	1.07749	1	IscW	Ixodes scapularis	hypothetical protein	XP_002414877.1
dd_Smed_v6_9918_0	0.154981	0.338426	2.18366	1.07569	1	CPLX1	Homo sapiens	complexin 1	NP_006642.1
dd_Smed_v6_7982_0	0.130584	0.274531	2.10233	1.07569	1
dd_Smed_v6_2565_0	0.221044	0.358112	1.6201	1.0744	1	GPD1	Homo sapiens	glycerol-3-phosphate dehydrogenase 1	NP_005267.2
dd_Smed_v6_9734_0	0.241963	0.37947	1.5683	1.07354	1	LOC101021456	Papio anubis	receptor-type tyrosine-protein phosphatase delta-like	XP_003911762.1
dd_Smed_v6_8176_0	0.254071	0.420759	1.65607	1.07352	1	HELZ2	Homo sapiens	helicase with zinc finger 2	NP_001032412.2
dd_Smed_v6_8757_0	0.280099	0.420829	1.50243	1.07217	1	CpipJ	Culex quinquefasciatus	glycerol-3-phosphate acyltransferase	XP_001843210.1
dd_Smed_v6_8092_0	0.143934	0.262808	1.8259	1.06963	1	INPP5B	Homo sapiens	inositol polyphosphate-5-phosphatase, 75kDa	XP_006710683.1
dd_Smed_v6_4522_0	0.122681	0.210112	1.71268	1.06804	1	SNRK	Homo sapiens	SNF related kinase	NP_060189.3
dd_Smed_v6_11761_0	0.104823	0.201053	1.91802	1.06688	1	CG12567	Drosophila melanogaster	CG12567 gene product from transcript CG12567-RF	NP_001015384.1
dd_Smed_v6_1724_0	0.0138356	1.93101	139.568	1.06475	1
dd_Smed_v6_4474_0	0.156358	0.262448	1.67851	1.06236	1
dd_Smed_v6_2549_0	0.138223	0.263351	1.90526	1.05898	1	Rufy1	Mus musculus	RUN and FYVE domain containing 1	XP_006532904.1
dd_Smed_v6_11626_0	0.310382	0.550715	1.77431	1.05856	1	LOC100745107	Bombus impatiens	monocarboxylate transporter 14-like	XP_003493731.1
dd_Smed_v6_2948_0	0.338558	0.508373	1.50158	1.05764	1	Ak1	Mus musculus	adenylate kinase 1	NP_001185719.1
dd_Smed_v6_1475_0	0.869861	1.10596	1.27142	1.05716	1	Dip-B	Drosophila melanogaster	Dipeptidase B	NP_650318.1
dd_Smed_v6_7869_0	0.233863	0.368348	1.57506	1.05642	1	NF1	Homo sapiens	neurofibromin 1	XP_006721989.1
dd_Smed_v6_8417_0	1.34361	1.78914	1.33158	1.05412	1
dd_Smed_v6_2319_0	0.272029	0.414739	1.52461	1.054	1	TMEM57	Homo sapiens	transmembrane protein 57	XP_005245988.1
dd_Smed_v6_3651_0	0.266965	0.406606	1.52307	1.05333	1	RAB39B	Homo sapiens	RAB39B, member RAS oncogene family	NP_741995.1
dd_Smed_v6_10841_0	0.160872	0.27154	1.68792	1.05253	1	Lrsam1	Mus musculus	leucine rich repeat and sterile alpha motif containing 1	NP_955006.1
dd_Smed_v6_10458_0	0.159545	0.288611	1.80896	1.05232	1	SLC6A5	Homo sapiens	solute carrier family 6 (neurotransmitter transporter), member 5	NP_004202.2
dd_Smed_v6_427_0	0.23471	0.669649	2.85309	1.05052	1	Grn	Mus musculus	granulin	NP_032201.2
dd_Smed_v6_1760_1	0.929095	1.24033	1.33498	1.04765	1	Pmar	Perkinsus marinus ATCC 50983	retrovirus polyprotein, putative	XP_002788040.1
dd_Smed_v6_3707_0	0.397252	0.580156	1.46042	1.04656	1	LMNA	Homo sapiens	lamin A/C	NP_005563.1
dd_Smed_v6_1671_0	0.921596	1.16989	1.26942	1.04535	1
dd_Smed_v6_7314_0	0.233817	0.361234	1.54494	1.04504	1	NALCN	Homo sapiens	sodium leak channel, non-selective	NP_443099.1
dd_Smed_v6_3281_0	0.295847	0.492392	1.66435	1.04275	1	ARI3	Arabidopsis thaliana	putative E3 ubiquitin-protein ligase ARI3	NP_189408.1
dd_Smed_v6_2581_0	0.206664	0.330153	1.59754	1.04181	1	ZNFX1	Homo sapiens	zinc finger NFX1-type containing 1	NP_066363.1
dd_Smed_v6_9589_0	0.11401	0.213792	1.87521	1.04151	1
dd_Smed_v6_6856_0	0.0113628	0.523557	46.0765	1.04031	1
dd_Smed_v6_4085_0	0.127699	0.224806	1.76044	1.03982	1	ZDHHC7	Homo sapiens	zinc finger DHHC-type containing 7	NP_060210.2
dd_Smed_v6_11018_0	0.197231	0.343721	1.74273	1.03881	1
dd_Smed_v6_14237_0	0.00684496	0.830454	121.323	1.03751	1
dd_Smed_v6_8089_0	0.163244	0.267831	1.64068	1.03694	1	ABLIM1	Chrysemys picta bellii	actin binding LIM protein 1	XP_005293927.1
dd_Smed_v6_2321_0	0.184959	0.313726	1.69619	1.03624	1	CFDP1	Homo sapiens	craniofacial development protein 1	NP_006315.1
dd_Smed_v6_5947_0	0.231221	0.352803	1.52583	1.03618	1	OSBPL9	Homo sapiens	oxysterol binding protein like 9	NP_683706.3
dd_Smed_v6_1969_0	0.766269	1.08401	1.41467	1.03579	1
dd_Smed_v6_9119_0	0.159837	0.295757	1.85037	1.03568	1	CEP112	Homo sapiens	centrosomal protein 112	XP_005257176.1
dd_Smed_v6_6423_0	0.24057	0.445838	1.85326	1.0346	1	AaeL	Aedes aegypti	AAEL014742-PA	XP_001649474.1
dd_Smed_v6_8463_0	0.280984	0.431134	1.53437	1.03413	1	Rgs3	Mus musculus	regulator of G-protein signaling 3	XP_006538129.1
dd_Smed_v6_9006_0	0.219252	0.355123	1.6197	1.03349	1	INSR	Homo sapiens	insulin receptor	NP_001073285.1
dd_Smed_v6_1179_0	0.568226	0.761083	1.3394	1.03293	1	AaeL	Aedes aegypti	AAEL012062-PA	XP_001662216.1
dd_Smed_v6_2422_0	0.4796	0.652661	1.36084	1.0322	1	UBR4	Homo sapiens	ubiquitin protein ligase E3 component n-recognin 4	XP_006710572.1
dd_Smed_v6_11184_0	0.261447	0.418197	1.59955	1.02988	1	PNPLA7	Homo sapiens	patatin like phospholipase domain containing 7	XP_006717165.1
dd_Smed_v6_1542_0	0.181557	0.302538	1.66636	1.02933	1	Tmem45b	Mus musculus	transmembrane protein 45b	NP_659185.1
dd_Smed_v6_18934_0	0.120449	0.233339	1.93725	1.02876	1	TRPM3	Homo sapiens	transient receptor potential cation channel subfamily M member 3	NP_996829.3
dd_Smed_v6_3069_0	0.0130207	1.06593	81.8646	1.02727	1
dd_Smed_v6_2223_0	0.028892	5.23836	181.308	1.02725	1
dd_Smed_v6_5291_0	0.822234	1.16515	1.41705	1.02675	1	Ccdc88a	Mus musculus	coiled coil domain containing 88A	XP_006514516.1
dd_Smed_v6_199_0	0.171472	0.268479	1.56573	1.02224	1
dd_Smed_v6_3739_0	0.182547	0.325287	1.78193	1.02193	1	GK	Homo sapiens	glycerol kinase	NP_976325.1
dd_Smed_v6_1425_0	0.726751	0.939716	1.29304	1.02117	1	ADD1	Homo sapiens	adducin 1	NP_001110.2
dd_Smed_v6_11620_0	0.315279	0.511646	1.62284	1.02103	1
dd_Smed_v6_3815_0	0.0207982	0.527516	25.3635	1.02024	1
dd_Smed_v6_3709_0	0.183618	0.295899	1.61149	1.01829	1	CCDC124	Homo sapiens	coiled-coil domain containing 124	NP_612451.1
dd_Smed_v6_2586_0	0.249692	0.381361	1.52733	1.01706	1	CDC42BPA	Homo sapiens	CDC42 binding protein kinase alpha	NP_055641.3
dd_Smed_v6_7649_0	0.148708	0.303735	2.04249	1.01706	1	LIFR	Capra hircus	leukemia inhibitory factor receptor alpha	XP_005694832.1
dd_Smed_v6_11927_0	0.11071	0.21128	1.9084	1.01604	1	SUV420H1	Homo sapiens	suppressor of variegation 4-20 homolog 1 (Drosophila)	XP_005274093.2
dd_Smed_v6_6006_0	0.263418	0.415295	1.57657	1.01551	1	CACNB1	Homo sapiens	calcium channel, voltage-dependent, beta 1 subunit	NP_954855.1
dd_Smed_v6_7993_0	0.162682	0.259364	1.5943	1.01497	1
dd_Smed_v6_1185_0	0.41247	0.574695	1.3933	1.01323	1	DICSQDRAFT	Dichomitus squalens LYAD-421 SS1	hypothetical protein	XP_007370845.1
dd_Smed_v6_6621_0	0.430016	0.608927	1.41606	1.01293	1	Gtf2f1	Mus musculus	general transcription factor IIF, polypeptide 1	NP_598562.1
dd_Smed_v6_18042_0	0.128114	0.24425	1.9065	1.01264	1	LOC100176573	Ciona intestinalis	zinc finger MYM-type protein 1-like	XP_002124319.2
dd_Smed_v6_5503_0	0.124457	0.213123	1.71242	1.01167	1	CLASP1	Homo sapiens	cytoplasmic linker associated protein 1	XP_006712437.1
dd_Smed_v6_6504_0	0.30362	0.491049	1.61731	1.01027	1	RALGAPA1	Homo sapiens	Ral GTPase activating protein catalytic alpha subunit 1	XP_005267555.1
dd_Smed_v6_5427_0	1.0297	1.33179	1.29338	1.01013	1	LUC7L3	Homo sapiens	LUC7 like 3 pre-mRNA splicing factor	XP_005257511.1
dd_Smed_v6_8587_0	0.138759	0.251406	1.81182	1.00927	1	Fcho2	Mus musculus	FCH domain only 2	NP_766179.2
dd_Smed_v6_3614_0	0.154866	0.264348	1.70694	1.00834	1	LOC101291872	Fragaria vesca subsp. vesca	zinc finger MYM-type protein 1-like	XP_004308301.1
dd_Smed_v6_8419_0	0.150554	0.240166	1.59522	1.00641	1
dd_Smed_v6_7659_0	0.15496	0.253086	1.63323	1.00285	1	Grip1	Mus musculus	glutamate receptor interacting protein 1	NP_001264221.1
dd_Smed_v6_1847_0	1.2484	1.68833	1.3524	1.00076	1	USP7	Homo sapiens	ubiquitin specific peptidase 7 (herpes virus-associated)	NP_003461.2
dd_Smed_v6_8624_0	0.245166	0.362993	1.4806	1.00012	1	Ppp1r12a	Mus musculus	protein phosphatase 1, regulatory (inhibitor) subunit 12A	XP_006513390.1
dd_Smed_v6_3905_0	0.150637	0.262569	1.74306	0.998893	1	PIP4K2B	Homo sapiens	phosphatidylinositol-5-phosphate 4-kinase, type II, beta	NP_003550.1
dd_Smed_v6_10756_0	0.00956577	4.7258	494.033	0.996214	1
dd_Smed_v6_8973_0	0.135443	0.231611	1.71002	0.996194	1	LTK	Homo sapiens	leukocyte receptor tyrosine kinase	XP_005254439.1
dd_Smed_v6_8285_0	0.38292	0.539689	1.4094	0.992017	1
dd_Smed_v6_1817_0	0.410928	0.574093	1.39706	0.990554	1	ACSS2	Homo sapiens	acyl-CoA synthetase short-chain family member 2	NP_061147.1
dd_Smed_v6_1152_2	1.01603	1.28948	1.26914	0.990196	1
dd_Smed_v6_7244_0	0.835267	1.13238	1.35571	0.989738	1	SBF2	Homo sapiens	SET binding factor 2	NP_112224.1
dd_Smed_v6_1718_0	0.01333	1.02865	77.1683	0.98908	1
dd_Smed_v6_7196_0	0.344994	0.492684	1.4281	0.986651	1	Kif21a	Mus musculus	kinesin family member 21A	NP_057914.2
dd_Smed_v6_6736_0	0.181997	0.283418	1.55727	0.986299	1	LOC100178094	Ciona intestinalis	fibrillin-1-like	XP_002124086.2
dd_Smed_v6_4120_0	0.0303659	0.480337	15.8183	0.985383	1	INHBE	Homo sapiens	inhibin, beta E	NP_113667.1
dd_Smed_v6_6016_0	0.329298	0.489619	1.48686	0.983142	1
dd_Smed_v6_7105_0	0.240401	0.368418	1.53252	0.982036	1	SNTB1	Homo sapiens	syntrophin beta 1	NP_066301.1
dd_Smed_v6_67_0	0.172374	0.531519	3.08352	0.981058	1	GRN	Homo sapiens	granulin	NP_002078.1
dd_Smed_v6_7462_0	0.13562	0.227598	1.67821	0.977821	1
dd_Smed_v6_7240_0	0.395296	0.578686	1.46393	0.977666	1	AGAP1	Homo sapiens	ArfGAP with GTPase domain, ankyrin repeat and PH domain 1	XP_005246116.1
dd_Smed_v6_9673_0	0.00645937	0.310601	48.0854	0.977519	1
dd_Smed_v6_8225_0	0.253827	0.413319	1.62835	0.976867	1	RANBP10	Homo sapiens	RAN binding protein 10	NP_065901.1
dd_Smed_v6_10794_0	0.223378	0.354449	1.58676	0.976714	1	GLRA2	Homo sapiens	glycine receptor alpha 2	XP_006724550.1
dd_Smed_v6_1574_4	0.267571	0.413547	1.54556	0.975358	1	GPR107	Homo sapiens	G protein-coupled receptor 107	NP_001274275.1
dd_Smed_v6_14300_0	0.100356	0.211339	2.10589	0.974915	1	POGK	Homo sapiens	pogo transposable element with KRAB domain	XP_005245428.1
dd_Smed_v6_1727_0	0.204309	0.323565	1.58371	0.972449	1	VPS29	Homo sapiens	vacuolar protein sorting 29 homolog (S. cerevisiae)	NP_057310.1
dd_Smed_v6_8678_0	0.311628	0.50059	1.60637	0.971102	1	CG34408	Drosophila melanogaster	CG34408 gene product from transcript CG34408-RF	NP_001138184.1
dd_Smed_v6_8922_0	0.110336	0.210068	1.9039	0.968023	1	TBC1D25	Homo sapiens	TBC1 domain family member 25	NP_002527.1
dd_Smed_v6_1733_0	1.72071	2.14097	1.24424	0.967692	1	C11orf54	Homo sapiens	chromosome 11 open reading frame 54	NP_001272999.1
dd_Smed_v6_19328_0	0.13468	0.242808	1.80285	0.965935	1	SYT9	Homo sapiens	synaptotagmin 9	NP_783860.1
dd_Smed_v6_4812_2	0.150519	0.24895	1.65395	0.964666	1	LPCAT1	Homo sapiens	lysophosphatidylcholine acyltransferase 1	XP_005248430.1
dd_Smed_v6_1634_0	0.412183	0.568918	1.38026	0.964389	1	STK3	Homo sapiens	serine/threonine kinase 3	NP_006272.2
dd_Smed_v6_5523_0	0.172259	0.27428	1.59225	0.964036	1	LOC101864108	Aplysia californica	resistance to inhibitors of cholinesterase protein 3-like	XP_005111195.1
dd_Smed_v6_7871_0	0.146687	0.246007	1.67709	0.963803	1	Pcdh17	Mus musculus	protocadherin 17	XP_006518970.1
dd_Smed_v6_6249_0	0.204623	0.321078	1.56912	0.963009	1	DGKB	Homo sapiens	diacylglycerol kinase beta	XP_005249688.1
dd_Smed_v6_10628_0	0.175388	0.283123	1.61427	0.961332	1
dd_Smed_v6_2632_0	0.187541	0.307167	1.63786	0.959843	1	SMIM14	Homo sapiens	small integral membrane protein 14	NP_777581.1
dd_Smed_v6_23270_0	0.140211	0.247261	1.7635	0.95792	1	NRXN1	Homo sapiens	neurexin 1	NP_004792.1
dd_Smed_v6_9161_0	0.151442	0.94821	6.26123	0.957678	1	PCIF1	Homo sapiens	PDX1 C-terminal inhibiting factor 1	NP_071387.1
dd_Smed_v6_9365_0	0.428955	0.597258	1.39236	0.957489	1	LOC100375191	Saccoglossus kowalevskii	zinc finger protein Dzip1-like	XP_006823292.1
dd_Smed_v6_6969_0	0.109047	0.261683	2.39972	0.956296	1	Dvir	Drosophila virilis	GJ21915 gene product from transcript GJ21915-RA	XP_002050040.1
dd_Smed_v6_15778_0	0.285195	0.455277	1.59637	0.955655	1
dd_Smed_v6_8776_0	0.177791	0.349431	1.9654	0.955643	1	AT1G70150	Arabidopsis thaliana	zinc ion binding protein	NP_177172.6
dd_Smed_v6_7210_0	0.20347	0.309181	1.51954	0.955595	1	FZD4	Homo sapiens	frizzled class receptor 4	NP_036325.2
dd_Smed_v6_1751_0	0.199188	0.305516	1.53381	0.955031	1	KEAP1	Homo sapiens	kelch like ECH associated protein 1	NP_036421.2
dd_Smed_v6_6078_0	0.188474	0.304128	1.61363	0.954933	1	MRPL46	Homo sapiens	mitochondrial ribosomal protein L46	NP_071446.2
dd_Smed_v6_2039_0	0.215973	0.34269	1.58673	0.95313	1
dd_Smed_v6_9547_0	0.18705	0.299888	1.60325	0.953071	1	RAPGEF4	Homo sapiens	Rap guanine nucleotide exchange factor (GEF) 4	NP_008954.2
dd_Smed_v6_5439_0	0.644071	0.938894	1.45775	0.952396	1	TENM2	Homo sapiens	teneurin transmembrane protein 2	XP_006714961.1
dd_Smed_v6_6823_0	0.138467	0.253923	1.83382	0.948372	1	LOC101856271	Aplysia californica	uncharacterized LOC101856271	XP_005100611.1
dd_Smed_v6_248_0	0.951296	1.24499	1.30873	0.948314	1
dd_Smed_v6_6616_0	0.194824	0.314512	1.61434	0.944545	1	SLC6A5	Homo sapiens	solute carrier family 6 (neurotransmitter transporter), member 5	NP_004202.2
dd_Smed_v6_18031_0	0.167006	0.270767	1.6213	0.944338	1	AgaP	Anopheles gambiae str. PEST	AGAP009136-PA	XP_319897.4
dd_Smed_v6_964_0	0.335478	0.567291	1.691	0.942794	1
dd_Smed_v6_1051_0	0.785701	1.02253	1.30142	0.938548	1	ENY2	Homo sapiens	enhancer of yellow 2 homolog (Drosophila)	NP_064574.1
dd_Smed_v6_4877_0	0.137631	0.248167	1.80312	0.93701	1	PRKAG1	Homo sapiens	protein kinase AMP-activated non-catalytic subunit gamma 1	NP_002724.1
dd_Smed_v6_6002_0	0.231535	0.341796	1.47622	0.935677	1	LOC100313668	Saccoglossus kowalevskii	neuralized PATS1	NP_001161599.1
dd_Smed_v6_1132_0	0.122519	0.206065	1.6819	0.931444	1	LOC100198022	Hydra vulgaris	gelsolin-like protein 2	XP_002155137.2
dd_Smed_v6_5006_0	0.129487	0.223673	1.72739	0.930208	1	ERLEC1	Homo sapiens	endoplasmic reticulum lectin 1	NP_056516.2
dd_Smed_v6_6759_0	0.141918	0.218986	1.54305	0.929594	1
dd_Smed_v6_4018_0	0.196032	0.300836	1.53463	0.929492	1	Bm1	Brugia malayi	PH domain containing protein	XP_001893391.1
dd_Smed_v6_5797_0	0.868174	1.143	1.31656	0.929165	1	enok	Drosophila melanogaster	enoki mushroom	NP_523838.1
dd_Smed_v6_6612_0	0.249208	0.386086	1.54925	0.928973	1	MTSS1L	Homo sapiens	metastasis suppressor 1-like	XP_006721398.1
dd_Smed_v6_14547_0	0.149218	0.356621	2.38994	0.927896	1	EXO1	Homo sapiens	exonuclease 1	NP_003677.4
dd_Smed_v6_476_0	0.363539	0.512139	1.40876	0.925333	1	GDI1	Homo sapiens	GDP dissociation inhibitor 1	NP_001484.1
dd_Smed_v6_9345_0	0.380527	0.590511	1.55182	0.922363	1
dd_Smed_v6_4716_0	0.784106	1.0619	1.35428	0.921864	1	RIIAD1	Homo sapiens	regulatory subunit of type II PKA R-subunit (RIIa) domain containing 1	NP_001138428.1
dd_Smed_v6_6450_0	0.143015	0.234972	1.64299	0.920944	1	METTL3	Homo sapiens	methyltransferase like 3	NP_062826.2
dd_Smed_v6_12363_0	0.160185	0.259375	1.61922	0.919532	1	SYDE2	Homo sapiens	synapse defective 1, Rho GTPase, homolog 2 (C. elegans)	XP_005271309.1
dd_Smed_v6_5548_0	0.376138	0.58283	1.54951	0.91683	1
dd_Smed_v6_3955_0	0.833931	1.06148	1.27286	0.916448	1	RBM25	Homo sapiens	RNA binding motif protein 25	NP_067062.1
dd_Smed_v6_5423_0	0.123693	0.203233	1.64304	0.915657	1	LOC101469107	Maylandia zebra	oxysterol-binding protein-related protein 6-like	XP_004557836.1
dd_Smed_v6_3380_0	0.153151	0.247936	1.6189	0.915239	1	TBCB	Homo sapiens	tubulin folding cofactor B	NP_001272.2
dd_Smed_v6_4025_0	0.21199	0.318552	1.50267	0.914654	1	RNF31	Homo sapiens	ring finger protein 31	NP_060469.4
dd_Smed_v6_6563_0	0.703154	0.919102	1.30711	0.914437	1	Dmoj	Drosophila mojavensis	GI11945 gene product from transcript GI11945-RA	XP_002012399.1
dd_Smed_v6_8708_0	0.521446	0.724474	1.38936	0.914356	1	SRGAP1	Homo sapiens	SLIT-ROBO Rho GTPase activating protein 1	NP_065813.1
dd_Smed_v6_387_0	1.5438	1.83342	1.1876	0.914122	1	SDCBP	Homo sapiens	syndecan binding protein (syntenin)	NP_001007070.1
dd_Smed_v6_5020_0	0.188439	0.323422	1.71632	0.913091	1	CASD1	Homo sapiens	CAS1 domain containing 1	NP_075051.4
dd_Smed_v6_4996_0	0.187011	0.295109	1.57803	0.912672	1
dd_Smed_v6_2582_0	1.0521	1.32542	1.25978	0.912336	1	KDM3A	Homo sapiens	lysine demethylase 3A	XP_006712114.1
dd_Smed_v6_9859_1	0.165354	0.253056	1.53039	0.912213	1
dd_Smed_v6_4810_0	0.601372	0.85687	1.42486	0.91143	1	PLEKHM3	Homo sapiens	pleckstrin homology domain containing M3	NP_001073944.1
dd_Smed_v6_5641_0	0.191027	0.301696	1.57933	0.908356	1	SLC25A12	Homo sapiens	solute carrier family 25 member 12	NP_003696.2
dd_Smed_v6_12778_0	0.300877	0.420782	1.39852	0.90559	1
dd_Smed_v6_7964_0	0.155855	0.258836	1.66074	0.904719	1	ACTN2	Homo sapiens	actinin, alpha 2	NP_001265272.1
dd_Smed_v6_13138_0	0.140264	0.228324	1.62782	0.90149	1	AaeL	Aedes aegypti	ablim	XP_001653201.1
dd_Smed_v6_16935_0	0.189882	0.289145	1.52276	0.899476	1	LOC100496059	Xenopus tropicalis	zinc finger MYM-type protein 1-like	XP_002934849.2
dd_Smed_v6_1968_2	0.325201	0.484641	1.49028	0.899009	1	LOC100163890	Acyrthosiphon pisum	interference hedgehog	XP_001952576.1
dd_Smed_v6_10808_0	0.324974	0.465376	1.43204	0.897776	1	Ercc5	Mus musculus	excision repair cross-complementing rodent repair deficiency, complementation group 5	NP_035859.2
dd_Smed_v6_4552_0	0.221007	0.387327	1.75255	0.896368	1	Cbr-npp-11	Caenorhabditis briggsae	C. briggsae CBR-NPP-11 protein	XP_002646303.1
dd_Smed_v6_10742_0	0.246499	0.366363	1.48627	0.895388	1	SETD2	Homo sapiens	SET domain containing 2	XP_005265151.1
dd_Smed_v6_13835_0	0.0756827	0.146434	1.93484	0.893933	1	Rhbdl2	Mus musculus	rhomboid, veinlet-like 2 (Drosophila)	NP_898986.2
dd_Smed_v6_1878_0	0.219204	0.333136	1.51975	0.893255	1	CG6463	Drosophila melanogaster	CG6463 gene product from transcript CG6463-RA	NP_648409.1
dd_Smed_v6_16335_0	0.149226	0.268088	1.79652	0.892312	1
dd_Smed_v6_3491_0	0.258303	0.37018	1.43312	0.891032	1	YTHDC1	Homo sapiens	YTH domain containing 1	NP_001026902.1
dd_Smed_v6_11259_0	0.861103	1.18413	1.37514	0.890809	1	TRPM2	Homo sapiens	transient receptor potential cation channel, subfamily M, member 2	XP_006724113.1
dd_Smed_v6_2403_0	0.386374	0.520986	1.3484	0.890404	1	FAF2	Homo sapiens	Fas associated factor family member 2	NP_055428.1
dd_Smed_v6_2808_0	0.368525	0.503858	1.36723	0.889595	1	STRN	Homo sapiens	striatin, calmodulin binding protein	XP_005264576.1
dd_Smed_v6_7962_0	0.53121	0.753813	1.41905	0.888351	1
dd_Smed_v6_11948_0	0.148942	0.234746	1.57609	0.887728	1	ITGA8	Homo sapiens	integrin, alpha 8	NP_001278423.1
dd_Smed_v6_10244_0	0.21136	0.347903	1.64603	0.88593	1	Ttll3	Mus musculus	tubulin tyrosine ligase-like family, member 3	NP_598684.4
dd_Smed_v6_915_0	0.401731	0.583054	1.45136	0.885293	1	Grn	Mus musculus	granulin	NP_032201.2
dd_Smed_v6_4201_0	0.115991	0.201948	1.74106	0.885162	1	PDP2	Homo sapiens	pyruvate dehyrogenase phosphatase catalytic subunit 2	NP_065837.1
dd_Smed_v6_6617_0	0.14254	0.481511	3.37807	0.883344	1
dd_Smed_v6_4230_0	0.234164	0.358264	1.52997	0.880944	1	SEC31A	Homo sapiens	SEC31 homolog A (S. cerevisiae)	XP_006714208.1
dd_Smed_v6_4675_0	0.682708	0.934923	1.36943	0.879931	1
dd_Smed_v6_3142_0	0.249083	0.354183	1.42195	0.879373	1
dd_Smed_v6_5708_0	0.226728	0.335026	1.47766	0.877362	1
dd_Smed_v6_9646_0	0.123122	0.215639	1.75142	0.876805	1	TRAF3	Homo sapiens	TNF receptor associated factor 3	NP_001186356.1
dd_Smed_v6_10311_0	0.320909	0.476067	1.4835	0.875865	1	BPTF	Homo sapiens	bromodomain PHD finger transcription factor	NP_872579.2
dd_Smed_v6_12222_0	0.236992	0.361336	1.52468	0.875398	1	SCAP	Homo sapiens	SREBF chaperone	NP_036367.2
dd_Smed_v6_5911_0	0.210884	0.334892	1.58804	0.872872	1	ANKRD44	Homo sapiens	ankyrin repeat domain 44	NP_710181.2
dd_Smed_v6_1270_0	0.145084	0.223484	1.54037	0.872839	1	SLC20A1	Homo sapiens	solute carrier family 20 member 1	NP_005406.3
dd_Smed_v6_12993_0	0.439235	0.644206	1.46665	0.871762	1	Phum	Pediculus humanus corporis	enzymatic polyprotein, putative	XP_002431501.1
dd_Smed_v6_9455_0	0.240313	0.474323	1.97377	0.871575	1	ZRSR2	Homo sapiens	zinc finger (CCCH type), RNA-binding motif and serine/arginine rich 2	XP_005274654.1
dd_Smed_v6_10156_0	0.284962	0.441261	1.54849	0.871375	1	Cacna1d	Mus musculus	calcium channel, voltage-dependent, L type, alpha 1D subunit	NP_001077085.1
dd_Smed_v6_9865_1	0.149995	0.237683	1.58461	0.869759	1	CpipJ	Culex quinquefasciatus	hypothetical protein	XP_001868487.1
dd_Smed_v6_1648_0	0.512308	0.656077	1.28063	0.869161	1	VPS13C	Homo sapiens	vacuolar protein sorting 13 homolog C (S. cerevisiae)	NP_060154.3
dd_Smed_v6_1381_0	0.175292	0.274559	1.56629	0.867918	1	WSB1	Homo sapiens	WD repeat and SOCS box containing 1	NP_599027.1
dd_Smed_v6_7527_0	0.222296	0.32554	1.46445	0.867582	1	SEL1L3	Homo sapiens	SEL1L family member 3	NP_001284523.1
dd_Smed_v6_8216_0	0.234422	0.340063	1.45064	0.867421	1
dd_Smed_v6_13605_0	0.163752	0.267158	1.63148	0.865547	1	TTLL9	Homo sapiens	tubulin tyrosine ligase-like family, member 9	XP_006723782.1
dd_Smed_v6_16446_0	0.239591	0.391926	1.63581	0.865489	1	LOC100890274	Strongylocentrotus purpuratus	latrophilin-1	XP_003727174.1
dd_Smed_v6_10888_0	0.193194	0.289922	1.50067	0.864931	1
dd_Smed_v6_788_0	0.466	4.9255	10.5698	0.862658	1
dd_Smed_v6_645_0	0.651197	0.893078	1.37144	0.858804	1	ankrd52	Cynoglossus semilaevis	ankyrin repeat domain 52	XP_008317288.1
dd_Smed_v6_10422_0	0.152608	0.251482	1.6479	0.856715	1
dd_Smed_v6_6313_0	0.265109	0.396236	1.49462	0.854693	1	TIGD6	Homo sapiens	tigger transposable element derived 6	NP_112215.1
dd_Smed_v6_1032_0	0.260579	0.366592	1.40684	0.85449	1	CREB3L1	Homo sapiens	cAMP responsive element binding protein 3-like 1	NP_443086.1
dd_Smed_v6_14413_0	0.236003	0.362049	1.53409	0.852479	1
dd_Smed_v6_6117_0	0.453975	0.622762	1.3718	0.850968	1	dopey1	Poecilia formosa	dopey family member 1	XP_007565504.1
dd_Smed_v6_9022_0	0.18081	0.262139	1.44981	0.850124	1	TBC1D31	Homo sapiens	TBC1 domain family, member 31	XP_005251160.1
dd_Smed_v6_6832_0	0.172698	0.259315	1.50156	0.849975	1
dd_Smed_v6_2812_0	0.237725	0.348077	1.4642	0.848931	1	LOC100878406	Megachile rotundata	sequestosome-1-like	XP_003702345.1
dd_Smed_v6_3630_0	0.231433	0.357289	1.54381	0.848375	1	APMAP	Homo sapiens	adipocyte plasma membrane associated protein	NP_065392.1
dd_Smed_v6_9831_0	0.306655	0.456568	1.48887	0.845277	1	FAM160A1	Homo sapiens	family with sequence similarity 160 member A1	NP_001103447.1
dd_Smed_v6_10011_0	0.217418	0.332404	1.52887	0.844785	1
dd_Smed_v6_5713_0	0.337762	0.487082	1.44209	0.843795	1	SLC6A5	Homo sapiens	solute carrier family 6 (neurotransmitter transporter), member 5	NP_004202.2
dd_Smed_v6_4917_0	0.244976	0.342259	1.39711	0.841826	1	FERMT2	Homo sapiens	fermitin family member 2	NP_006823.1
dd_Smed_v6_8155_0	0.111858	0.185245	1.65607	0.841537	1	ZBED5	Homo sapiens	zinc finger BED-type containing 5	NP_067034.2
dd_Smed_v6_1203_0	0.383419	0.503226	1.31247	0.840291	1	HM13	Homo sapiens	histocompatibility (minor) 13	NP_110416.1
dd_Smed_v6_7818_0	0.398213	0.582643	1.46314	0.837638	1	MAPKBP1	Homo sapiens	mitogen-activated protein kinase binding protein 1	NP_055809.2
dd_Smed_v6_8902_0	0.215594	0.323774	1.50178	0.834169	1	MSI2	Homo sapiens	musashi RNA binding protein 2	XP_006721744.1
dd_Smed_v6_3020_0	0.454651	0.624674	1.37396	0.833122	1
dd_Smed_v6_3333_0	0.174011	0.258776	1.48713	0.831609	1
dd_Smed_v6_9208_0	0.303518	0.415544	1.36909	0.831284	1	ABCC2	Homo sapiens	ATP binding cassette subfamily C member 2	NP_000383.1
dd_Smed_v6_2482_0	0.155962	0.235038	1.50702	0.830714	1	TXNDC17	Homo sapiens	thioredoxin domain containing 17	NP_116120.1
dd_Smed_v6_7485_0	0.200476	0.309798	1.54531	0.830206	1
dd_Smed_v6_12032_0	0.24132	0.352146	1.45925	0.828246	1
dd_Smed_v6_4248_0	0.169351	0.260256	1.53678	0.82779	1	TMF1	Homo sapiens	TATA element modulatory factor 1	NP_009045.2
dd_Smed_v6_5924_0	0.375407	0.514921	1.37164	0.82723	1	MAPK10	Homo sapiens	mitogen-activated protein kinase 10	NP_620446.1
dd_Smed_v6_6809_0	0.1725	0.266936	1.54746	0.825438	1	ANO8	Homo sapiens	anoctamin 8	NP_066010.1
dd_Smed_v6_458_0	0.702241	0.875877	1.24726	0.825002	1	UBB	Homo sapiens	ubiquitin B	NP_061828.1
dd_Smed_v6_3484_0	0.88712	1.23193	1.38869	0.824951	1	MPPED1	Homo sapiens	metallophosphoesterase domain containing 1	NP_001037835.1
dd_Smed_v6_6928_0	0.180228	0.284633	1.5793	0.823947	1	PTPN4	Homo sapiens	protein tyrosine phosphatase, non-receptor type 4	NP_002821.1
dd_Smed_v6_8155_1	0.206966	0.331164	1.60008	0.821334	1	XIAP	Homo sapiens	X-linked inhibitor of apoptosis	NP_001158.2
dd_Smed_v6_5791_0	0.2194	0.327973	1.49486	0.820236	1
dd_Smed_v6_8933_0	0.201224	0.336836	1.67394	0.819717	1	TRAF3	Homo sapiens	TNF receptor associated factor 3	NP_001186356.1
dd_Smed_v6_3173_0	0.169208	0.251117	1.48408	0.819447	1	MAP2K4	Homo sapiens	mitogen-activated protein kinase kinase 4	NP_003001.1
dd_Smed_v6_10429_0	0.233987	0.381761	1.63155	0.819089	1	Dsim	Drosophila simulans	GD20399 gene product from transcript GD20399-RA	XP_002103407.1
dd_Smed_v6_2033_0	0.224512	0.315745	1.40636	0.818956	1
dd_Smed_v6_3847_0	0.41645	0.554763	1.33212	0.818631	1	atf6	Cynoglossus semilaevis	activating transcription factor 6	XP_008334680.1
dd_Smed_v6_10369_0	0.603296	0.781007	1.29457	0.818431	1	CNTRL	Homo sapiens	centriolin	XP_006717007.1
dd_Smed_v6_6104_0	0.604245	0.842407	1.39415	0.818393	1	MIB1	Homo sapiens	mindbomb E3 ubiquitin protein ligase 1	NP_065825.1
dd_Smed_v6_1764_0	0.265447	0.388673	1.46422	0.818321	1	SEC24C	Homo sapiens	SEC24 homolog C, COPII coat complex component	NP_004913.2
dd_Smed_v6_5076_0	0.138493	0.213463	1.54133	0.816825	1	COL4A3BP	Homo sapiens	collagen, type IV, alpha 3 (Goodpasture antigen) binding protein	NP_112729.1
dd_Smed_v6_5244_0	0.146853	0.228696	1.55731	0.815571	1	TTBK1	Homo sapiens	tau tubulin kinase 1	XP_006715292.1
dd_Smed_v6_13963_0	0.896613	1.52303	1.69865	0.81553	1	LOC101853922	Aplysia californica	WD repeat-containing protein 89-like	XP_005095487.1
dd_Smed_v6_4566_0	0.597738	0.796666	1.3328	0.811627	1
dd_Smed_v6_14761_0	0.306849	0.417651	1.3611	0.809669	1	LOC100571609	Acyrthosiphon pisum	ATP-dependent DNA helicase pif1-like	XP_003240824.1
dd_Smed_v6_6781_0	0.147851	0.227209	1.53674	0.80728	1	LUC7L3	Homo sapiens	LUC7 like 3 pre-mRNA splicing factor	NP_057508.2
dd_Smed_v6_2373_0	0.191079	0.300163	1.57089	0.804965	1	Cbr-tag-241	Caenorhabditis briggsae	C. briggsae CBR-TAG-241 protein	XP_002645442.1
dd_Smed_v6_6124_0	0.214177	0.299799	1.39977	0.802533	1	LOC100871276	Apis florea	protein cramped-like	XP_003696269.1
dd_Smed_v6_4361_0	0.194604	0.296425	1.52322	0.801594	1	DHX58	Homo sapiens	DEXH-box helicase 58	NP_077024.2
dd_Smed_v6_4235_0	0.66416	0.84984	1.27957	0.801218	1	BAP1	Homo sapiens	BRCA1 associated protein-1 (ubiquitin carboxy-terminal hydrolase)	NP_004647.1
dd_Smed_v6_14472_0	0.453224	0.609706	1.34526	0.801149	1
dd_Smed_v6_8184_0	0.139795	0.224625	1.60682	0.800811	1
dd_Smed_v6_2357_0	0.216209	0.305669	1.41377	0.797782	1
dd_Smed_v6_11134_0	0.186674	0.293038	1.56979	0.79724	1
dd_Smed_v6_4189_0	0.127489	0.200606	1.57351	0.796779	1	SPR	Homo sapiens	sepiapterin reductase (7,8-dihydrobiopterin:NADP oxidoreductase)	NP_003115.1
dd_Smed_v6_5582_0	0.30265	0.429884	1.4204	0.7966	1	RYR2	Homo sapiens	ryanodine receptor 2	NP_001026.2
dd_Smed_v6_3523_0	0.406481	0.543027	1.33592	0.795591	1	ANK2	Homo sapiens	ankyrin 2, neuronal	NP_066187.2
dd_Smed_v6_16208_0	0.146128	0.272308	1.8635	0.794494	1	Pus3	Mus musculus	pseudouridine synthase 3	NP_075781.3
dd_Smed_v6_4500_0	0.169448	0.247528	1.46079	0.794343	1	Foxk1	Mus musculus	forkhead box K1	XP_006504717.1
dd_Smed_v6_2579_0	0.606542	0.779751	1.28557	0.790942	1	Dnajc13	Mus musculus	DnaJ heat shock protein family (Hsp40) member C13	NP_001156498.1
dd_Smed_v6_5228_0	0.370821	0.522839	1.40995	0.790797	1	LOC100680147	Nasonia vitripennis	zinc finger protein 346-like	XP_003424088.1
dd_Smed_v6_6589_0	0.14815	0.221157	1.49279	0.790362	1	LOC102637973	Mus musculus	putative UDP-GlcNAc:betaGal beta-1,3-N-acetylglucosaminyltransferase LOC402377-like	XP_006543696.1
dd_Smed_v6_9949_0	0.134577	0.227622	1.69139	0.790002	1	AaeL	Aedes aegypti	AAEL011732-PA	XP_001661874.1
dd_Smed_v6_5360_0	0.335853	0.494722	1.47303	0.788731	1	CpipJ	Culex quinquefasciatus	diphosphomevalonate decarboxylase	XP_001844728.1
dd_Smed_v6_4168_0	0.2496	0.381469	1.52832	0.786751	1	COPS6	Homo sapiens	COP9 signalosome subunit 6	NP_006824.2
dd_Smed_v6_3823_0	0.31816	0.58671	1.84407	0.785174	1
dd_Smed_v6_12679_0	0.138623	0.225609	1.6275	0.784299	1	Kif26a	Mus musculus	kinesin family member 26A	XP_006516226.1
dd_Smed_v6_13328_0	0.381546	0.489293	1.2824	0.782402	1
dd_Smed_v6_7344_0	0.430236	0.577677	1.3427	0.781536	1	SPTBN1	Homo sapiens	spectrin beta, non-erythrocytic 1	NP_003119.2
dd_Smed_v6_1976_0	0.124067	0.186385	1.50229	0.779707	1	ATP6V0D1	Homo sapiens	ATPase H transporting V0 subunit d1	NP_004682.2
dd_Smed_v6_10128_0	0.484088	0.68515	1.41534	0.779302	1	LOC100114274	Nasonia vitripennis	mTERF domain-containing protein 1, mitochondrial	XP_008204450.1
dd_Smed_v6_2121_1	0.427418	0.578825	1.35424	0.778087	1	MOV10L1	Homo sapiens	Mov10 RISC complex RNA helicase like 1	XP_005261981.1
dd_Smed_v6_5650_0	0.236492	0.324795	1.37339	0.777151	1
dd_Smed_v6_4380_0	0.243622	0.493138	2.02419	0.774576	1
dd_Smed_v6_9699_0	0.354484	0.520042	1.46704	0.774221	1	LOC100548960	Meleagris gallopavo	anion exchange protein 3-like	XP_003207662.1
dd_Smed_v6_12594_0	0.207719	0.296849	1.42909	0.772945	1	RYK	Homo sapiens	receptor-like tyrosine kinase	NP_002949.2
dd_Smed_v6_1158_0	0.244945	0.340938	1.39189	0.772861	1	CHMP5	Homo sapiens	charged multivesicular body protein 5	NP_057494.3
dd_Smed_v6_10278_0	0.039748	0.132318	3.32892	0.771546	1	MAT1A	Homo sapiens	methionine adenosyltransferase 1A	NP_000420.1
dd_Smed_v6_12219_0	0.169064	0.24745	1.46365	0.771429	1	Helz2	Mus musculus	helicase with zinc finger 2, transcriptional coactivator	NP_898985.2
dd_Smed_v6_2064_0	3.0797	3.6432	1.18297	0.771098	1	PPIG	Homo sapiens	peptidylprolyl isomerase G	NP_004783.2
dd_Smed_v6_1212_0	0.113382	0.187816	1.65649	0.770445	1	MAP3K3	Homo sapiens	mitogen-activated protein kinase kinase kinase 3	NP_002392.2
dd_Smed_v6_988_0	0.363403	0.487013	1.34015	0.769808	1	NDUFA12	Homo sapiens	NADH:ubiquinone oxidoreductase subunit A12	NP_061326.1
dd_Smed_v6_6037_0	0.158204	0.234462	1.48202	0.769182	1	FEZ1	Homo sapiens	fasciculation and elongation protein zeta 1 (zygin I)	NP_005094.1
dd_Smed_v6_11005_0	0.170664	0.275199	1.61252	0.768824	1
dd_Smed_v6_3470_0	0.145146	0.218899	1.50813	0.767903	1	SCYL1	Homo sapiens	SCY1-like 1 (S. cerevisiae)	NP_065731.3
dd_Smed_v6_3744_0	0.347123	0.461046	1.32819	0.767662	1
dd_Smed_v6_1996_0	0.369273	0.494099	1.33803	0.766628	1
dd_Smed_v6_11534_0	0.195836	0.303954	1.55208	0.766286	1	Rhbdf1	Mus musculus	rhomboid family 1 (Drosophila)	NP_034247.2
dd_Smed_v6_6184_0	0.279121	0.400135	1.43355	0.766083	1	LOC100890087	Strongylocentrotus purpuratus	uncharacterized LOC100890087	XP_003730758.1
dd_Smed_v6_13719_0	0.14204	0.220692	1.55373	0.764482	1	TRAF3	Homo sapiens	TNF receptor associated factor 3	NP_003291.2
dd_Smed_v6_6114_0	0.62612	0.813735	1.29965	0.762957	1	MEIS2	Homo sapiens	Meis homeobox 2	XP_006720590.1
dd_Smed_v6_9824_0	0.451387	0.584412	1.2947	0.76271	1	BZRAP1	Mustela putorius furo	benzodiazapine receptor (peripheral) associated protein 1	XP_004747369.1
dd_Smed_v6_3587_1	0.319217	0.420264	1.31655	0.761825	1	DUSP10	Homo sapiens	dual specificity phosphatase 10	NP_009138.1
dd_Smed_v6_7397_0	0.143197	0.212259	1.48229	0.759732	1	Ccdc102b	Chinchilla lanigera	coiled-coil domain containing 102B	XP_005373106.1
dd_Smed_v6_6229_0	0.201531	0.279439	1.38658	0.758526	1
dd_Smed_v6_1225_0	1.24553	1.45368	1.16712	0.758429	1	CSNK1A1	Homo sapiens	casein kinase 1 alpha 1	NP_001883.4
dd_Smed_v6_6081_0	0.351542	0.495696	1.41006	0.7576	1	LMJF	Leishmania major strain Friedlin	putative protein kinase	XP_001681155.1
dd_Smed_v6_14132_0	0.129272	0.194494	1.50453	0.757553	1
dd_Smed_v6_6100_0	0.374356	0.533725	1.42572	0.757474	1	PIGP	Homo sapiens	phosphatidylinositol glycan anchor biosynthesis, class P	NP_710149.1
dd_Smed_v6_3449_0	0.184139	0.274469	1.49055	0.757307	1	FAM46C	Homo sapiens	family with sequence similarity 46 member C	NP_060179.2
dd_Smed_v6_8315_0	0.21621	0.303981	1.40595	0.756597	1	BIRC6	Homo sapiens	baculoviral IAP repeat containing 6	NP_057336.3
dd_Smed_v6_12268_0	0.266465	0.414233	1.55455	0.75189	1	LOC660006	Tribolium castaneum	actin-binding LIM protein 3	XP_008198001.1
dd_Smed_v6_14671_0	0.165555	0.247699	1.49617	0.750894	1	LOC102691859	Lepisosteus oculatus	regulator of G-protein signaling 7-binding protein-like	XP_006626883.1
dd_Smed_v6_13202_0	0.123505	0.183562	1.48628	0.748758	1	CLIC1	Homo sapiens	chloride intracellular channel 1	NP_001279.2
dd_Smed_v6_3977_0	0.975683	1.19587	1.22568	0.747793	1	SNAP25	Homo sapiens	synaptosomal-associated protein, 25kDa	NP_003072.2
dd_Smed_v6_2650_0	0.277886	0.372615	1.34089	0.747026	1	AP1M1	Homo sapiens	adaptor related protein complex 1 mu 1 subunit	NP_115882.1
dd_Smed_v6_14730_0	0.286755	0.397814	1.3873	0.746288	1	CACNA1H	Homo sapiens	calcium channel, voltage-dependent, T type, alpha 1H subunit	NP_001005407.1
dd_Smed_v6_12259_2	0.258606	0.374398	1.44776	0.744402	1
dd_Smed_v6_7736_0	0.241789	0.35324	1.46094	0.744308	1	SLC9B2	Homo sapiens	solute carrier family 9 member B2	NP_849155.2
dd_Smed_v6_6481_0	0.392809	0.526942	1.34147	0.739345	1
dd_Smed_v6_3997_0	0.59937	0.752851	1.25607	0.738966	1	CCAR1	Homo sapiens	cell division cycle and apoptosis regulator 1	NP_060707.2
dd_Smed_v6_9168_0	0.582593	0.740802	1.27156	0.736574	1	POLA1	Homo sapiens	polymerase (DNA) alpha 1, catalytic subunit	NP_058633.2
dd_Smed_v6_972_0	0.33965	0.443715	1.30639	0.735572	1	PGK1	Homo sapiens	phosphoglycerate kinase 1	NP_000282.1
dd_Smed_v6_4142_0	0.251533	0.354913	1.411	0.73533	1	Abcg1	Microtus ochrogaster	ATP-binding cassette, sub-family G (WHITE), member 1	XP_005360366.1
dd_Smed_v6_8465_0	0.263296	0.367603	1.39616	0.735247	1	PHTF2	Homo sapiens	putative homeodomain transcription factor 2	NP_065165.3
dd_Smed_v6_2233_0	0.20819	0.291436	1.39986	0.735024	1	DDX1	Homo sapiens	DEAD/H-box helicase 1	NP_004930.1
dd_Smed_v6_2130_0	0.17981	0.302167	1.68048	0.734148	1
dd_Smed_v6_6966_0	0.16697	0.244517	1.46444	0.733147	1	Apc	Mus musculus	adenomatosis polyposis coli	NP_031488.2
dd_Smed_v6_1397_0	2.87958	3.3331	1.1575	0.7331	1	ZRANB2	Homo sapiens	zinc finger RANBP2-type containing 2	NP_005446.2
dd_Smed_v6_2727_0	0.0562668	0.13391	2.37991	0.730758	1
dd_Smed_v6_1061_0	6.91373	7.72407	1.11721	0.729323	1
dd_Smed_v6_16850_0	0.576531	0.721089	1.25074	0.729306	1
dd_Smed_v6_1282_0	0.198998	0.272583	1.36977	0.728549	1	MAPK11	Homo sapiens	mitogen-activated protein kinase 11	NP_002742.3
dd_Smed_v6_5543_0	0.102721	0.166413	1.62004	0.728244	1	CHAF1B	Homo sapiens	chromatin assembly factor 1 subunit B	NP_005432.1
dd_Smed_v6_593_1	2.9456	3.38178	1.14808	0.728228	1	AaeL	Aedes aegypti	AAEL014668-PA	XP_001649301.1
dd_Smed_v6_3210_0	0.207441	0.285018	1.37397	0.727437	1	SYP	Homo sapiens	synaptophysin	NP_003170.1
dd_Smed_v6_6427_0	0.226421	0.329446	1.45502	0.725201	1	EXOC1	Homo sapiens	exocyst complex component 1	NP_839955.1
dd_Smed_v6_15639_0	0.162117	0.242386	1.49513	0.724605	1	ERCC4	Homo sapiens	excision repair cross-complementation group 4	NP_005227.1
dd_Smed_v6_7426_0	0.140923	0.26601	1.88762	0.72451	1	CBLL1	Homo sapiens	Cbl proto-oncogene-like 1, E3 ubiquitin protein ligase	NP_001271220.1
dd_Smed_v6_9057_0	0.252012	0.358483	1.42248	0.724129	1
dd_Smed_v6_7442_0	1.47319	1.83095	1.24285	0.723619	1
dd_Smed_v6_10693_0	0.503149	0.680254	1.35199	0.721438	1	LOC100372234	Saccoglossus kowalevskii	phosphatidylinositol 4-phosphate 5-kinase type-1 gamma-like	XP_006821157.1
dd_Smed_v6_6581_1	0.162259	0.251971	1.5529	0.720406	1	LOC101845083	Aplysia californica	sorting nexin-14-like	XP_005095368.1
dd_Smed_v6_6311_0	0.243466	0.34356	1.41112	0.720231	1	GCC1	Homo sapiens	GRIP and coiled-coil domain containing 1	NP_078799.2
dd_Smed_v6_2243_0	0.175253	0.248874	1.42008	0.719048	1
dd_Smed_v6_3064_0	0.243994	0.326345	1.33751	0.71602	1	ADD1	Homo sapiens	adducin 1	NP_001110.2
dd_Smed_v6_7128_0	0.258439	0.357118	1.38182	0.71545	1	Stat5a	Mus musculus	signal transducer and activator of transcription 5A	NP_035618.1
dd_Smed_v6_5410_0	0.328823	0.438726	1.33423	0.713751	1	AaeL	Aedes aegypti	ablim	XP_001653201.1
dd_Smed_v6_2390_0	0.654104	0.883233	1.35029	0.713692	1	MFN2	Homo sapiens	mitofusin 2	NP_055689.1
dd_Smed_v6_7318_0	0.56474	0.712756	1.2621	0.710182	1	RECQL	Homo sapiens	RecQ like helicase	NP_116559.1
dd_Smed_v6_15844_0	0.238936	0.335006	1.40207	0.709577	1	CCDC33	Homo sapiens	coiled-coil domain containing 33	XP_006720760.1
dd_Smed_v6_6251_0	0.34153	0.453766	1.32863	0.706664	1	PCDH1	Homo sapiens	protocadherin 1	NP_001265542.1
dd_Smed_v6_6166_0	0.238291	0.321985	1.35122	0.705643	1	UBR3	Homo sapiens	ubiquitin protein ligase E3 component n-recognin 3 (putative)	XP_006712333.1
dd_Smed_v6_5347_0	0.376303	0.490011	1.30217	0.701263	1	LOC100159941	Acyrthosiphon pisum	nuclear pore complex protein nup98	XP_008188663.1
dd_Smed_v6_5468_0	0.393797	0.519669	1.31964	0.701082	1	PPFIA2	Homo sapiens	PTPRF interacting protein alpha 2	NP_001207409.1
dd_Smed_v6_5783_0	0.267722	0.357535	1.33547	0.700675	1	Camk1d	Mus musculus	calcium/calmodulin-dependent protein kinase ID	NP_796317.2
dd_Smed_v6_2306_0	0.157494	0.230735	1.46504	0.700139	1	VPS37C	Homo sapiens	VPS37C, ESCRT-I subunit	NP_060436.4
dd_Smed_v6_4791_0	0.236103	0.334721	1.41769	0.699844	1	Unc119b	Mus musculus	unc-119 lipid binding chaperone B	NP_780561.1
dd_Smed_v6_10392_0	0.156888	0.229926	1.46554	0.698933	1	HDAC8	Homo sapiens	histone deacetylase 8	NP_001159891.1
dd_Smed_v6_13305_1	0.190985	0.295968	1.5497	0.69808	1	LOC101733787	Xenopus (Silurana) tropicalis	zinc finger MYM-type protein 1-like	XP_004911475.1
dd_Smed_v6_10192_0	0.271118	0.379084	1.39823	0.696964	1	slc17a7	Xenopus (Silurana) tropicalis	solute carrier family 17 (vesicular glutamate transporter), member 7	NP_001072608.1
dd_Smed_v6_1814_0	0.169649	0.238482	1.40573	0.696747	1	CYFIP2	Homo sapiens	cytoplasmic FMR1 interacting protein 2	NP_055191.2
dd_Smed_v6_4242_0	0.15672	0.218741	1.39575	0.69593	1	LOC103444978	Malus domestica	serine/threonine-protein kinase HT1-like	XP_008382167.1
dd_Smed_v6_6196_0	0.173234	0.238186	1.37494	0.695203	1
dd_Smed_v6_1827_0	0.130842	0.188818	1.4431	0.693947	1	NPTN	Homo sapiens	neuroplastin	NP_001154836.1
dd_Smed_v6_9709_0	0.227334	0.307024	1.35054	0.693544	1
dd_Smed_v6_2560_0	0.409372	0.523105	1.27782	0.691984	1	LOC101078428	Takifugu rubripes	pre-mRNA 3'-end-processing factor FIP1-like	XP_003976601.1
dd_Smed_v6_12946_0	0.283175	0.384628	1.35827	0.691135	1	Baiap3	Mus musculus	BAI1-associated protein 3	NP_001156742.1
dd_Smed_v6_12815_0	0.401856	0.515609	1.28307	0.690212	1	CHD6	Homo sapiens	chromodomain helicase DNA binding protein 6	XP_006723946.1
dd_Smed_v6_4537_0	0.14007	0.19582	1.39802	0.689303	1	GPN1	Homo sapiens	GPN-loop GTPase 1	NP_009197.2
dd_Smed_v6_2398_0	0.258075	0.349608	1.35467	0.688724	1	AT2G43465	Arabidopsis thaliana	RNA-binding ASCH domain protein	NP_001154572.1
dd_Smed_v6_11409_0	0.339884	0.450995	1.32691	0.686616	1	NEO1	Homo sapiens	neogenin 1	XP_005254470.1
dd_Smed_v6_4257_0	0.392061	0.497721	1.2695	0.684624	1	CLPX	Homo sapiens	caseinolytic mitochondrial matrix peptidase chaperone subunit	NP_006651.2
dd_Smed_v6_3056_0	0.256135	0.350074	1.36676	0.684383	1	Cdc73	Mus musculus	cell division cycle 73, Paf1/RNA polymerase II complex component	NP_666103.1
dd_Smed_v6_2540_0	0.159708	0.224885	1.4081	0.684205	1
dd_Smed_v6_5512_0	0.291337	0.382833	1.31406	0.683708	1	CycY	Drosophila melanogaster	Cyclin Y	NP_609519.1
dd_Smed_v6_1555_0	0.268278	0.349634	1.30325	0.683198	1
dd_Smed_v6_10640_0	0.200462	0.276195	1.37779	0.680792	1	MFSD6	Homo sapiens	major facilitator superfamily domain containing 6	XP_005246713.1
dd_Smed_v6_4223_0	0.309329	0.432283	1.39749	0.679901	1	CERS2	Homo sapiens	ceramide synthase 2	NP_071358.1
dd_Smed_v6_9279_0	0.250693	0.349901	1.39574	0.67919	1	CEP162	Homo sapiens	centrosomal protein 162kDa	NP_055710.2
dd_Smed_v6_6185_0	0.225045	0.322596	1.43347	0.677991	1	DIP2A	Homo sapiens	DIP2 disco-interacting protein 2 homolog A (Drosophila)	NP_055966.2
dd_Smed_v6_5720_0	0.359639	0.45406	1.26254	0.674423	1	STK10	Homo sapiens	serine/threonine kinase 10	NP_005981.3
dd_Smed_v6_10590_2	0.18124	0.279748	1.54352	0.672932	1
dd_Smed_v6_1775_0	0.184147	0.25271	1.37233	0.671447	1	CG7920	Drosophila melanogaster	CG7920 gene product from transcript CG7920-RA	NP_651762.1
dd_Smed_v6_3763_0	0.276904	0.380275	1.37331	0.671442	1	SLMAP	Homo sapiens	sarcolemma associated protein	XP_005265528.1
dd_Smed_v6_6735_0	0.206603	0.294092	1.42347	0.670755	1	STX16	Homo sapiens	syntaxin 16	NP_003754.2
dd_Smed_v6_4446_0	0.606553	0.780881	1.28741	0.670129	1	Dana	Drosophila ananassae	GF24861 gene product from transcript GF24861-RA	XP_001955900.1
dd_Smed_v6_4852_0	0.304247	0.428483	1.40834	0.669322	1	COG5	Homo sapiens	component of oligomeric golgi complex 5	NP_006339.3
dd_Smed_v6_13843_0	0.327346	0.432198	1.32031	0.669232	1	CUX1	Homo sapiens	cut-like homeobox 1	NP_853530.2
dd_Smed_v6_7182_0	0.829578	1.04925	1.2648	0.668116	1	LOC100372622	Saccoglossus kowalevskii	piezo-type mechanosensitive ion channel component 2-like	XP_006818270.1
dd_Smed_v6_489_0	0.543649	0.668131	1.22897	0.666736	1	TAOK2	Homo sapiens	TAO kinase 2	NP_004774.1
dd_Smed_v6_2203_0	0.220678	0.30514	1.38274	0.665271	1	AAMDC	Homo sapiens	adipogenesis associated, Mth938 domain containing	NP_078960.1
dd_Smed_v6_4999_0	0.191605	0.290647	1.51691	0.662508	1	Frmd4a	Mus musculus	FERM domain containing 4A	NP_766063.3
dd_Smed_v6_3359_0	0.196262	0.266865	1.35974	0.662471	1	PAFAH1B1	Homo sapiens	platelet activating factor acetylhydrolase 1b regulatory subunit 1	NP_000421.1
dd_Smed_v6_2700_0	0.377337	0.488528	1.29467	0.661597	1	TMEM57	Homo sapiens	transmembrane protein 57	XP_005245988.1
dd_Smed_v6_2968_0	0.425867	0.554292	1.30156	0.658471	1	PICK1	Homo sapiens	protein interacting with PRKCA 1	XP_006724442.1
dd_Smed_v6_1702_0	0.443178	0.558007	1.25911	0.658289	1	YWHAE	Homo sapiens	tyrosine 3-monooxygenase/tryptophan 5-monooxygenase activation protein epsilon	NP_006752.1
dd_Smed_v6_5755_0	0.156609	0.219429	1.40113	0.657203	1
dd_Smed_v6_922_0	0.725848	0.872384	1.20188	0.655782	1
dd_Smed_v6_11189_0	0.333422	0.447551	1.34229	0.654308	1	CC2D2A	Homo sapiens	coiled-coil and C2 domain containing 2A	NP_001073991.2
dd_Smed_v6_9795_0	0.172107	0.259002	1.50489	0.654209	1	NTN1	Homo sapiens	netrin 1	NP_004813.2
dd_Smed_v6_3375_0	0.375539	0.522996	1.39265	0.654045	1	APAF1	Homo sapiens	apoptotic peptidase activating factor 1	NP_001151.1
dd_Smed_v6_17128_0	0.189916	0.267024	1.40601	0.654	1	LOC100177200	Ciona intestinalis	uncharacterized protein F54H12.2-like	XP_002123084.2
dd_Smed_v6_5407_0	0.235993	0.308403	1.30683	0.653346	1	LOC100370729	Saccoglossus kowalevskii	protein scribble homolog	XP_006821778.1
dd_Smed_v6_6508_0	0.300972	0.390266	1.29668	0.652794	1	TBC1D30	Homo sapiens	TBC1 domain family, member 30	XP_006719364.1
dd_Smed_v6_1839_0	0.414917	0.525205	1.26581	0.652404	1	PRPF38B	Homo sapiens	pre-mRNA processing factor 38B	NP_060531.2
dd_Smed_v6_3366_0	0.207667	0.296938	1.42987	0.652022	1	WDR47	Homo sapiens	WD repeat domain 47	XP_006710524.1
dd_Smed_v6_1161_0	0.171852	0.236729	1.37752	0.650601	1	HMCN1	Homo sapiens	hemicentin 1	NP_114141.2
dd_Smed_v6_1096_0	0.448717	0.56027	1.2486	0.649498	1	NME1	Homo sapiens	NME/NM23 nucleoside diphosphate kinase 1	NP_000260.1
dd_Smed_v6_3787_0	0.380254	0.476217	1.25237	0.64909	1	mtl5	Poecilia formosa	metallothionein-like 5, testis-specific (tesmin)	XP_007541551.1
dd_Smed_v6_3140_0	0.250439	0.356804	1.42471	0.647607	1	MLX	Homo sapiens	MLX, MAX dimerization protein	NP_937848.1
dd_Smed_v6_4444_0	0.258449	0.343147	1.32772	0.646503	1	LOC101861132	Aplysia californica	testis-expressed sequence 2 protein-like	XP_005101302.1
dd_Smed_v6_3618_1	0.208343	0.282569	1.35627	0.64612	1	DOCK1	Homo sapiens	dedicator of cytokinesis 1	NP_001371.1
dd_Smed_v6_9377_0	0.366877	0.491284	1.3391	0.645316	1
dd_Smed_v6_3358_0	0.190115	0.256125	1.34721	0.643122	1	TMEM33	Homo sapiens	transmembrane protein 33	NP_060596.2
dd_Smed_v6_5008_0	0.189835	0.263005	1.38544	0.642921	1	OPLAH	Homo sapiens	5-oxoprolinase (ATP-hydrolysing)	NP_060040.1
dd_Smed_v6_1613_0	0.385881	0.485372	1.25783	0.641095	1	EPB41L3	Homo sapiens	erythrocyte membrane protein band 4.1 like 3	NP_001268464.1
dd_Smed_v6_6635_0	0.858572	1.03032	1.20004	0.640111	1	SCAPER	Homo sapiens	S-phase cyclin A-associated protein in the ER	NP_001139395.1
dd_Smed_v6_13855_0	0.203693	0.278138	1.36548	0.638578	1
dd_Smed_v6_8348_0	0.149969	0.216543	1.44392	0.637476	1	SIK2	Homo sapiens	salt-inducible kinase 2	NP_056006.1
dd_Smed_v6_129_2	0.723454	0.884072	1.22202	0.637186	1	LOC100891800	Strongylocentrotus purpuratus	uncharacterized LOC100891800	XP_003730851.1
dd_Smed_v6_3212_0	0.174121	0.241991	1.38979	0.634955	1	EFR3B	Homo sapiens	EFR3 homolog B	NP_055786.1
dd_Smed_v6_7586_0	0.433701	0.760291	1.75303	0.634362	1	CNA05510	Cryptococcus neoformans var. neoformans JEC21	cAMP-dependent protein kinase inhibitor	XP_566876.1
dd_Smed_v6_1494_0	0.462778	0.568726	1.22894	0.633935	1	ATP6V1E1	Homo sapiens	ATPase H transporting V1 subunit E1	NP_001687.1
dd_Smed_v6_17773_0	0.168979	0.239155	1.41529	0.633008	1	LOC103377303	Cynoglossus semilaevis	dynein heavy chain 5, axonemal-like	XP_008306285.1
dd_Smed_v6_13998_0	0.170741	0.232323	1.36067	0.632761	1	FCHSD2	Homo sapiens	FCH and double SH3 domains 2	NP_055639.2
dd_Smed_v6_11514_0	0.156269	0.228678	1.46336	0.632192	1
dd_Smed_v6_1927_0	0.178688	0.239527	1.34048	0.631873	1	PLEKHB2	Homo sapiens	pleckstrin homology domain containing B2	NP_060428.2
dd_Smed_v6_6289_0	1.03049	1.24727	1.21037	0.631752	1
dd_Smed_v6_7211_0	0.615019	0.785938	1.27791	0.630264	1	LOC100202951	Hydra vulgaris	protein retinal degeneration B-like	XP_002168443.2
dd_Smed_v6_4963_0	0.150071	0.503579	3.3556	0.629966	1
dd_Smed_v6_2180_0	0.189121	0.25787	1.36352	0.629621	1	PRKAR1B	Homo sapiens	protein kinase cAMP-dependent type I regulatory subunit beta	NP_002726.1
dd_Smed_v6_2762_0	0.263944	0.340227	1.28902	0.62881	1	ZC2HC1A	Homo sapiens	zinc finger, C2HC-type containing 1A	NP_057094.2
dd_Smed_v6_7187_0	0.30001	0.395971	1.31986	0.628303	1
dd_Smed_v6_8562_0	0.150111	0.214495	1.42891	0.627837	1	ADAR	Homo sapiens	adenosine deaminase, RNA-specific	NP_001020278.1
dd_Smed_v6_2756_0	0.808102	0.943687	1.16778	0.625267	1
dd_Smed_v6_5804_0	0.163398	0.221799	1.35741	0.625127	1	PHF10	Homo sapiens	PHD finger protein 10	NP_060758.2
dd_Smed_v6_7408_0	0.178498	0.248306	1.39109	0.624523	1	PAK1	Homo sapiens	p21 (RAC1) activated kinase 1	NP_002567.3
dd_Smed_v6_2904_0	0.236972	0.30601	1.29134	0.623503	1	BRAFLDRAFT	Branchiostoma floridae	hypothetical protein	XP_002613931.1
dd_Smed_v6_4251_0	0.506642	0.632925	1.24926	0.622548	1
dd_Smed_v6_4236_0	0.187234	0.252732	1.34982	0.622546	1	UBR2	Homo sapiens	ubiquitin protein ligase E3 component n-recognin 2	XP_005249022.1
dd_Smed_v6_366_0	0.668683	0.797301	1.19234	0.621267	1	PGD	Homo sapiens	phosphogluconate dehydrogenase	NP_002622.2
dd_Smed_v6_2153_0	0.74888	0.880108	1.17523	0.618873	1	ACSL3	Homo sapiens	acyl-CoA synthetase long-chain family member 3	NP_004448.2
dd_Smed_v6_17517_0	0.18986	0.279224	1.47068	0.618446	1	Dmoj	Drosophila mojavensis	GI13361 gene product from transcript GI13361-RA	XP_002008205.1
dd_Smed_v6_1673_0	0.102842	0.188732	1.83516	0.61687	1	Gel	Drosophila melanogaster	Gelsolin	NP_524865.2
dd_Smed_v6_8128_0	0.172175	0.23244	1.35002	0.616261	1
dd_Smed_v6_6665_0	0.490898	0.640561	1.30488	0.614743	1	PELO	Homo sapiens	pelota homolog (Drosophila)	NP_057030.3
dd_Smed_v6_14672_0	0.153526	0.214383	1.39639	0.612938	1
dd_Smed_v6_8948_0	0.172303	0.23795	1.381	0.610767	1	CG31323	Drosophila melanogaster	CG31323 gene product from transcript CG31323-RA	NP_651467.1
dd_Smed_v6_5176_0	0.203919	0.271685	1.33232	0.608026	1	CpipJ	Culex quinquefasciatus	microtubule binding protein	XP_001850012.1
dd_Smed_v6_4576_0	0.617422	1.44885	2.34661	0.607975	1
dd_Smed_v6_9408_0	0.258452	0.349563	1.35253	0.606756	1
dd_Smed_v6_537_0	0.178349	0.260633	1.46136	0.604335	1	LOC100263273	Vitis vinifera	pollen-specific protein SF3-like	XP_002279922.1
dd_Smed_v6_665_0	0.180088	0.241746	1.34237	0.603749	1	IPO5	Homo sapiens	importin 5	NP_002262.3
dd_Smed_v6_6201_0	0.511393	0.649968	1.27098	0.603722	1	TRPA1	Homo sapiens	transient receptor potential cation channel subfamily A member 1	NP_015628.2
dd_Smed_v6_8975_0	0.176596	0.244348	1.38366	0.602936	1	PB000727.03.0	Plasmodium berghei ANKA	serine/threonine protein kinase	XP_676213.1
dd_Smed_v6_4456_0	0.325505	0.406001	1.24729	0.602605	1	DNAJC1	Homo sapiens	DnaJ heat shock protein family (Hsp40) member C1	NP_071760.2
dd_Smed_v6_4227_0	0.189818	0.270005	1.42244	0.602317	1	UBE2M	Homo sapiens	ubiquitin conjugating enzyme E2 M	NP_003960.1
dd_Smed_v6_4386_0	0.190809	0.257368	1.34882	0.602018	1	PRPF38A	Homo sapiens	pre-mRNA processing factor 38A	NP_116253.2
dd_Smed_v6_11194_0	0.454906	0.632978	1.39145	0.598697	1
dd_Smed_v6_3927_0	1.23319	1.44389	1.17086	0.597612	1	NIPBL	Homo sapiens	NIPBL, cohesin loading factor	NP_597677.2
dd_Smed_v6_4493_0	0.202956	0.270681	1.33369	0.597558	1	GNAL	Homo sapiens	G protein subunit alpha L	NP_001135811.1
dd_Smed_v6_6822_0	0.573595	0.764621	1.33303	0.596191	1	Gsg2	Mus musculus	germ cell-specific gene 2	NP_034483.1
dd_Smed_v6_10238_0	0.259509	0.415312	1.60037	0.592131	1	Smarcal1	Mus musculus	SWI/SNF related matrix associated, actin dependent regulator of chromatin, subfamily a-like 1	XP_006496208.1
dd_Smed_v6_4321_0	0.617521	0.792665	1.28362	0.590386	1	IMPDH1	Homo sapiens	IMP (inosine 5'-monophosphate) dehydrogenase 1	XP_006716036.1
dd_Smed_v6_4298_0	0.184439	0.249291	1.35162	0.589275	1	MRPS25	Homo sapiens	mitochondrial ribosomal protein S25	NP_071942.1
dd_Smed_v6_8506_0	0.3065	0.484746	1.58155	0.588792	1				WP_012156299.1
dd_Smed_v6_4807_0	0.244656	0.321777	1.31522	0.584454	1	CC2D1A	Homo sapiens	coiled-coil and C2 domain containing 1A	XP_005260031.1
dd_Smed_v6_6732_0	0.0804969	0.142737	1.77321	0.584298	1	LMNA	Homo sapiens	lamin A/C	NP_005563.1
dd_Smed_v6_1574_6	21.3181	23.2163	1.08904	0.584005	1
dd_Smed_v6_5287_0	0.187392	0.262426	1.40041	0.583919	1	MPP2	Homo sapiens	membrane palmitoylated protein 2	NP_005365.4
dd_Smed_v6_9993_0	0.464201	0.60561	1.30463	0.582073	1	SUZ12	Homo sapiens	SUZ12 polycomb repressive complex 2 subunit	XP_006721857.1
dd_Smed_v6_9945_0	0.245049	0.311539	1.27133	0.576474	1	MYCBP2	Homo sapiens	MYC binding protein 2, E3 ubiquitin protein ligase	XP_005266357.1
dd_Smed_v6_864_0	0.287281	0.366332	1.27517	0.575896	1	ARF1	Homo sapiens	ADP ribosylation factor 1	NP_001649.1
dd_Smed_v6_8589_0	0.277326	0.373899	1.34823	0.575719	1	PDE2A	Equus caballus	phosphodiesterase 2A	XP_001499110.1
dd_Smed_v6_9475_0	0.458075	0.559194	1.22075	0.573865	1	DAPK1	Homo sapiens	death-associated protein kinase 1	XP_006717051.1
dd_Smed_v6_17867_0	0.152971	0.209136	1.36716	0.573416	1	CPNE8	Homo sapiens	copine 8	NP_705898.1
dd_Smed_v6_8984_0	0.165724	0.219773	1.32614	0.572822	1	Dnhd1	Mus musculus	dynein heavy chain domain 1	XP_006544311.1
dd_Smed_v6_372_0	0.211812	0.561343	2.65019	0.572261	1
dd_Smed_v6_2963_0	0.41668	0.501458	1.20346	0.572028	1	usp9	Danio rerio	ubiquitin specific peptidase 9	NP_001070917.1
dd_Smed_v6_2853_0	0.24724	0.320911	1.29798	0.57128	1	YPEL5	Homo sapiens	yippee-like 5 (Drosophila)	NP_057145.1
dd_Smed_v6_16018_0	0.31	0.410297	1.32354	0.57023	1	Spr	Bombyx mori	sex peptide receptor	NP_001108346.1
dd_Smed_v6_9273_0	0.206127	0.285637	1.38573	0.569974	1	Egr1	Mus musculus	early growth response 1	NP_031939.1
dd_Smed_v6_6394_0	0.226794	0.293058	1.29217	0.569566	1	LOC101805037	Anas platyrhynchos	vesicle-associated membrane protein 2-like	XP_005028667.1
dd_Smed_v6_11387_0	0.199386	0.268088	1.34457	0.568349	1	Nek4	Mus musculus	NIMA (never in mitosis gene a)-related expressed kinase 4	XP_006519074.1
dd_Smed_v6_3303_0	0.617975	0.735506	1.19019	0.568056	1	Slc8a3	Mus musculus	solute carrier family 8 (sodium/calcium exchanger), member 3	NP_001161392.1
dd_Smed_v6_3037_0	0.272054	0.383242	1.4087	0.56709	1	GART	Homo sapiens	phosphoribosylglycinamide formyltransferase, phosphoribosylglycinamide synthetase, phosphoribosylaminoimidazole synthetase	NP_000810.1
dd_Smed_v6_8904_0	0.273316	0.360816	1.32014	0.565737	1	Mier3	Mus musculus	mesoderm induction early response 1, family member 3	XP_006517679.1
dd_Smed_v6_4177_0	0.405081	0.513141	1.26676	0.56463	1	ANAPC4	Homo sapiens	anaphase promoting complex subunit 4	NP_037499.2
dd_Smed_v6_8254_0	0.213708	0.289379	1.35409	0.564329	1	DYRK1A	Homo sapiens	dual-specificity tyrosine-(Y)-phosphorylation regulated kinase 1A	NP_569120.1
dd_Smed_v6_12715_0	0.134344	0.19	1.41428	0.563348	1	FARP2	Homo sapiens	FERM, RhoGEF and pleckstrin domain protein 2	NP_001269913.1
dd_Smed_v6_1900_0	2.67652	3.05677	1.14207	0.563034	1	CCNL1	Homo sapiens	cyclin L1	XP_005247708.1
dd_Smed_v6_11944_0	0.168812	0.227091	1.34523	0.563008	1	EXT1	Homo sapiens	exostosin glycosyltransferase 1	NP_000118.2
dd_Smed_v6_2025_0	0.354213	0.438076	1.23676	0.560392	1	TSPAN17	Homo sapiens	tetraspanin 17	NP_036303.1
dd_Smed_v6_3964_0	0.152128	0.205808	1.35286	0.560201	1	HEXB	Homo sapiens	hexosaminidase B (beta polypeptide)	NP_000512.1
dd_Smed_v6_9834_0	0.204494	0.263203	1.2871	0.559337	1	LOC100368071	Saccoglossus kowalevskii	uncharacterized LOC100368071	XP_002734456.1
dd_Smed_v6_1071_0	0.146882	0.269302	1.83346	0.556954	1	Vit	Mus musculus	vitrin	XP_006525092.1
dd_Smed_v6_536_0	1.14377	1.30244	1.13872	0.556762	1	PCK1	Homo sapiens	phosphoenolpyruvate carboxykinase 1	NP_002582.3
dd_Smed_v6_6775_0	0.402199	0.496233	1.2338	0.55663	1
dd_Smed_v6_2411_0	0.259727	0.325345	1.25264	0.556356	1	DDX3X	Homo sapiens	DEAD (Asp-Glu-Ala-Asp) box helicase 3, X-linked	NP_001347.3
dd_Smed_v6_6669_0	0.276754	0.349867	1.26418	0.556344	1	AgaP	Anopheles gambiae str. PEST	AGAP007060-PA	XP_565144.3
dd_Smed_v6_662_0	0.217593	0.283638	1.30353	0.555972	1	GPX4	Homo sapiens	glutathione peroxidase 4	NP_002076.2
dd_Smed_v6_2612_0	0.272992	0.342794	1.25569	0.555707	1	rbms1	Astyanax mexicanus	RNA binding motif, single stranded interacting protein 1	XP_007237398.1
dd_Smed_v6_9974_1	0.253764	0.34016	1.34046	0.555578	1	CBG05275	Caenorhabditis briggsae	Hypothetical protein CBG05275	XP_002645577.1
dd_Smed_v6_7492_0	0.31436	0.430206	1.36851	0.555544	1	COQ2	Homo sapiens	coenzyme Q2 4-hydroxybenzoate polyprenyltransferase	NP_056512.5
dd_Smed_v6_1978_0	0.265656	0.338983	1.27602	0.555104	1	AP3B2	Homo sapiens	adaptor related protein complex 3 beta 2 subunit	NP_004635.2
dd_Smed_v6_11987_0	0.132668	0.193624	1.45946	0.554526	1	Dmoj	Drosophila mojavensis	GI18711 gene product from transcript GI18711-RA	XP_002006160.1
dd_Smed_v6_2413_0	0.253845	0.326875	1.2877	0.554062	1	PRKACA	Homo sapiens	protein kinase, cAMP-dependent, catalytic, alpha	NP_002721.1
dd_Smed_v6_2215_0	0.279535	0.364695	1.30465	0.553419	1	FAM46D	Homo sapiens	family with sequence similarity 46 member D	NP_689843.1
dd_Smed_v6_3917_0	0.936776	1.09985	1.17408	0.553357	1	FMNL2	Homo sapiens	formin-like 2	XP_006712292.1
dd_Smed_v6_893_0	0.624776	0.725919	1.16189	0.553275	1	AP-1-2beta	Drosophila melanogaster	Adaptor Protein complex 1/2, beta subunit	NP_523415.1
dd_Smed_v6_1899_0	2.86052	3.1484	1.10064	0.55204	1	LUC7L3	Homo sapiens	LUC7 like 3 pre-mRNA splicing factor	XP_005257511.1
dd_Smed_v6_12353_0	0.40479	0.48908	1.20823	0.546852	1
dd_Smed_v6_3581_0	0.422845	0.499765	1.18191	0.54525	1	Micu1	Mus musculus	mitochondrial calcium uptake 1	XP_006513534.1
dd_Smed_v6_1031_0	0.353266	0.436582	1.23585	0.545131	1	DPP3	Homo sapiens	dipeptidyl peptidase 3	NP_005691.2
dd_Smed_v6_3963_0	0.203902	0.264234	1.29589	0.544966	1
dd_Smed_v6_9063_0	0.71074	0.839369	1.18098	0.54493	1
dd_Smed_v6_6398_0	0.193056	0.252351	1.30714	0.544491	1
dd_Smed_v6_1558_0	0.175779	0.238435	1.35645	0.543679	1
dd_Smed_v6_6655_0	0.260946	0.336361	1.28901	0.543571	1	COPS7B	Homo sapiens	COP9 signalosome subunit 7B	NP_001269879.1
dd_Smed_v6_5109_0	0.208514	0.274368	1.31583	0.542849	1	IVNS1ABP	Homo sapiens	influenza virus NS1A binding protein	NP_006460.2
dd_Smed_v6_2362_0	0.844558	1.011	1.19707	0.542054	1	ILKAP	Homo sapiens	integrin-linked kinase-associated serine/threonine phosphatase	XP_005246163.1
dd_Smed_v6_2852_0	0.189337	0.24747	1.30704	0.538853	1	dazap2-like	Ciona intestinalis	DAZ associated protein 2-like	NP_001027839.1
dd_Smed_v6_8650_0	0.150078	0.210392	1.40189	0.537838	1	SLC25A44	Homo sapiens	solute carrier family 25, member 44	NP_055470.1
dd_Smed_v6_7617_0	0.235271	0.30598	1.30054	0.536776	1	STXBP5	Homo sapiens	syntaxin binding protein 5 (tomosyn)	XP_006715402.1
dd_Smed_v6_12592_0	0.2165	0.292521	1.35114	0.53609	1	EPB41	Homo sapiens	erythrocyte membrane protein band 4.1	NP_004428.1
dd_Smed_v6_5283_0	0.289451	0.361343	1.24837	0.535915	1
dd_Smed_v6_3842_3	0.158062	0.217461	1.37579	0.533841	1	LOC100786509	Glycine max	uncharacterized LOC100786509	XP_003540882.1
dd_Smed_v6_15038_0	0.300375	0.376884	1.25471	0.5325	1
dd_Smed_v6_11507_0	0.184134	0.272428	1.47951	0.528652	1	LOC100649348	Bombus terrestris	nucleolar pre-ribosomal-associated protein 1-like	XP_003399988.1
dd_Smed_v6_5323_0	0.208986	0.278246	1.33141	0.528281	1	RASSF1	Homo sapiens	Ras association domain family member 1	NP_733830.1
dd_Smed_v6_1867_0	0.225425	0.29177	1.29431	0.528126	1	ISCU	Homo sapiens	iron-sulfur cluster assembly enzyme	NP_998760.1
dd_Smed_v6_10005_0	0.120359	0.167755	1.39379	0.5269	1	CRE	Caenorhabditis remanei	hypothetical protein	XP_003091156.1
dd_Smed_v6_3181_0	0.25176	0.317487	1.26107	0.526406	1	DDX46	Homo sapiens	DEAD-box helicase 46	NP_055644.2
dd_Smed_v6_9075_0	0.380616	0.469619	1.23384	0.52629	1	SYK	Homo sapiens	spleen tyrosine kinase	NP_003168.2
dd_Smed_v6_3100_0	0.327095	0.407159	1.24477	0.524056	1
dd_Smed_v6_15701_0	0.182221	0.239131	1.31232	0.523276	1
dd_Smed_v6_1448_0	0.232816	0.296369	1.27298	0.521602	1	COPZ1	Homo sapiens	coatomer protein complex, subunit zeta 1	NP_057141.1
dd_Smed_v6_6565_0	0.206575	0.273122	1.32215	0.520908	1	LOC100706712	Oreochromis niloticus	gem-associated protein 6-like	XP_003459829.1
dd_Smed_v6_3654_0	2.69985	2.97485	1.10186	0.520392	1	LOC101851171	Aplysia californica	microtubule-associated protein futsch-like	XP_005091094.1
dd_Smed_v6_3130_0	0.33419	0.408514	1.2224	0.518472	1	E2F4	Homo sapiens	E2F transcription factor 4	NP_001941.2
dd_Smed_v6_4706_1	0.250697	0.346692	1.38291	0.516957	1	KAT5	Homo sapiens	lysine acetyltransferase 5	NP_001193762.1
dd_Smed_v6_3395_0	0.289978	0.368211	1.26979	0.516394	1	TMEM30A	Homo sapiens	transmembrane protein 30A	NP_060717.1
dd_Smed_v6_3722_0	0.441385	0.534176	1.21023	0.515277	1	RASSF8	Homo sapiens	Ras association domain family member 8	NP_009142.2
dd_Smed_v6_2107_0	2.35257	2.72192	1.157	0.515234	1
dd_Smed_v6_813_0	0.599643	0.699296	1.16619	0.514988	1	RHOA	Homo sapiens	ras homolog family member A	NP_001655.1
dd_Smed_v6_9138_0	0.390465	0.492858	1.26223	0.513444	1	FAM58A	Homo sapiens	family with sequence similarity 58 member A	NP_689487.2
dd_Smed_v6_5673_0	0.235937	0.313767	1.32988	0.512589	1
dd_Smed_v6_9136_0	0.452678	0.543368	1.20034	0.511938	1	DYNC2H1	Homo sapiens	dynein cytoplasmic 2 heavy chain 1	NP_001073932.1
dd_Smed_v6_11077_0	0.133735	0.182571	1.36517	0.511589	1	LOAG	Loa loa	INX-1 protein	XP_003147443.1
dd_Smed_v6_7638_0	0.225689	0.278587	1.23438	0.510289	1	FAT1	Homo sapiens	FAT atypical cadherin 1	NP_005236.2
dd_Smed_v6_2649_0	0.374934	0.508885	1.35727	0.50529	1	FBN2	Homo sapiens	fibrillin 2	NP_001990.2
dd_Smed_v6_8078_0	0.300091	0.384557	1.28147	0.505265	1	EIF4G1	Gallus gallus	eukaryotic translation initiation factor 4 gamma, 1	XP_004943470.1
dd_Smed_v6_8415_0	0.695241	0.809609	1.1645	0.504571	1	LZTFL1	Homo sapiens	leucine zipper transcription factor like 1	NP_065080.1
dd_Smed_v6_15015_0	0.207536	0.264149	1.27279	0.504324	1	BBS7	Homo sapiens	Bardet-Biedl syndrome 7	NP_789794.1
dd_Smed_v6_15885_0	0.325309	0.416762	1.28113	0.502545	1
dd_Smed_v6_2140_0	0.399455	0.493804	1.23619	0.502439	1	ME1	Homo sapiens	malic enzyme 1	NP_002386.1
dd_Smed_v6_4643_0	0.193041	0.246804	1.2785	0.502126	1	OTUD5	Homo sapiens	OTU deubiquitinase 5	NP_001129629.1
dd_Smed_v6_13954_0	0.226965	0.291487	1.28428	0.501071	1	LOC101464953	Maylandia zebra	piggyBac transposable element-derived protein 4-like	XP_004568704.1
dd_Smed_v6_1316_0	0.885183	1.0256	1.15863	0.500777	1	UBE2G2	Homo sapiens	ubiquitin conjugating enzyme E2 G2	NP_001189418.1
dd_Smed_v6_2076_0	0.160236	0.204085	1.27365	0.499501	1	PGRMC2	Homo sapiens	progesterone receptor membrane component 2	NP_006311.2
dd_Smed_v6_1666_0	0.234076	0.289351	1.23614	0.497895	1	SORT1	Homo sapiens	sortilin 1	NP_002950.3
dd_Smed_v6_8491_0	0.162115	0.230661	1.42282	0.496778	1	NCAPH	Homo sapiens	non-SMC condensin I complex subunit H	NP_001268640.1
dd_Smed_v6_8967_0	1.38288	1.59858	1.15598	0.496011	1	KIAA1407	Pelodiscus sinensis	KIAA1407 ortholog	XP_006112334.1
dd_Smed_v6_6500_0	0.505161	0.696673	1.37911	0.49468	1	POLH	Homo sapiens	polymerase (DNA) eta	NP_001278899.1
dd_Smed_v6_4164_0	0.193547	0.243518	1.25819	0.494627	1	ZCWPW1	Homo sapiens	zinc finger, CW type with PWWP domain 1	XP_005250536.1
dd_Smed_v6_20985_0	0.217222	0.288651	1.32883	0.494547	1
dd_Smed_v6_1598_0	0.303859	0.386306	1.27133	0.493283	1
dd_Smed_v6_6188_0	2.04501	2.28576	1.11773	0.493203	1	dia	Apis mellifera	diaphanous	XP_395654.4
dd_Smed_v6_1667_0	0.297351	0.357193	1.20125	0.493202	1	CHMP3	Homo sapiens	charged multivesicular body protein 3	NP_057163.1
dd_Smed_v6_2431_0	0.178657	0.226301	1.26668	0.49103	1	CNP	Homo sapiens	2',3'-cyclic nucleotide 3' phosphodiesterase	XP_006721764.1
dd_Smed_v6_3880_0	0.298361	0.362182	1.2139	0.48907	1	LRBA	Homo sapiens	LPS responsive beige-like anchor protein	NP_006717.2
dd_Smed_v6_1586_0	0.201498	0.25366	1.25887	0.488389	1	TMBIM1	Homo sapiens	transmembrane BAX inhibitor motif containing 1	NP_071435.2
dd_Smed_v6_3721_0	0.196353	0.253618	1.29164	0.486992	1	BCAT1	Homo sapiens	branched chain amino-acid transaminase 1, cytosolic	NP_005495.2
dd_Smed_v6_3591_0	0.477272	0.566726	1.18743	0.486217	1	CCDC88A	Homo sapiens	coiled-coil domain containing 88A	NP_001129069.1
dd_Smed_v6_8451_0	0.0810465	0.120715	1.48946	0.485348	1
dd_Smed_v6_1399_0	1.02032	1.15332	1.13036	0.485327	1
dd_Smed_v6_11669_0	0.202723	0.258148	1.2734	0.485088	1	ACA1	Acanthamoeba castellanii str. Neff	protein kinase domain containing protein	XP_004339596.1
dd_Smed_v6_1529_0	0.25542	0.317843	1.24439	0.4849	1	WDR83OS	Homo sapiens	WD repeat domain 83 opposite strand	NP_057229.1
dd_Smed_v6_12387_0	0.186267	0.235833	1.2661	0.482631	1	Birc6	Mus musculus	baculoviral IAP repeat-containing 6	XP_006523591.1
dd_Smed_v6_10078_0	0.169727	0.228467	1.34609	0.479588	1	FAN1	Homo sapiens	FANCD2/FANCI-associated nuclease 1	NP_055782.3
dd_Smed_v6_5013_0	0.17092	0.219988	1.28709	0.477448	1
dd_Smed_v6_3660_0	0.226619	0.284938	1.25734	0.477339	1	LOC100167773	Acyrthosiphon pisum	serrate RNA effector molecule homolog	XP_001950813.2
dd_Smed_v6_7924_0	0.510186	0.606085	1.18797	0.47521	1	LAMA1	Homo sapiens	laminin, alpha 1	NP_005550.2
dd_Smed_v6_1637_0	0.459982	0.536883	1.16718	0.473218	1	FLOT1	Homo sapiens	flotillin 1	NP_005794.1
dd_Smed_v6_2657_0	0.234855	0.301602	1.2842	0.471932	1
dd_Smed_v6_890_0	0.792669	0.899791	1.13514	0.470355	1
dd_Smed_v6_927_1	1.0503	1.16655	1.11068	0.470295	1	FLOT2	Homo sapiens	flotillin 2	NP_004466.2
dd_Smed_v6_5071_0	0.20909	0.261312	1.24976	0.466321	1
dd_Smed_v6_4969_0	0.37545	0.470453	1.25304	0.465627	1	TXNRD2	Homo sapiens	thioredoxin reductase 2	NP_006431.2
dd_Smed_v6_1034_0	0.273179	0.334455	1.22431	0.465573	1	DDX6	Homo sapiens	DEAD-box helicase 6	NP_004388.2
dd_Smed_v6_11208_0	0.219112	0.281304	1.28384	0.465255	1
dd_Smed_v6_8449_0	0.209893	0.270321	1.2879	0.464974	1	MAP3K11	Homo sapiens	mitogen-activated protein kinase kinase kinase 11	NP_002410.1
dd_Smed_v6_10681_0	0.311035	0.387234	1.24498	0.464916	1	PTT	Pyrenophora teres f. teres 0-1	hypothetical protein	XP_003305714.1
dd_Smed_v6_14064_0	0.238329	0.301697	1.26589	0.462851	1	TOP2A	Homo sapiens	topoisomerase (DNA) II alpha	NP_001058.2
dd_Smed_v6_12660_2	0.425032	0.521544	1.22707	0.460696	1	TIGD1	Homo sapiens	tigger transposable element derived 1	NP_663748.1
dd_Smed_v6_6933_0	0.403724	0.483475	1.19754	0.459968	1	CEP135	Chelonia mydas	centrosomal protein 135kDa	XP_007071105.1
dd_Smed_v6_3806_0	0.23621	0.301087	1.27466	0.455609	1	Mon2	Mus musculus	MON2 homolog, regulator of endosome to Golgi trafficking	NP_700444.2
dd_Smed_v6_2542_0	0.343101	0.411183	1.19843	0.454742	1	CG8243	Drosophila melanogaster	CG8243 gene product from transcript CG8243-RA	NP_610424.1
dd_Smed_v6_13734_0	0.351392	0.41736	1.18773	0.454687	1
dd_Smed_v6_3842_4	0.243014	0.303729	1.24984	0.453759	1	CRE	Caenorhabditis remanei	hypothetical protein	XP_003090602.1
dd_Smed_v6_8723_0	0.196627	0.242346	1.23252	0.453512	1	CLK2	Homo sapiens	CDC like kinase 2	XP_005244935.1
dd_Smed_v6_8618_0	0.252721	0.308967	1.22256	0.450528	1	SRCAP	Homo sapiens	Snf2-related CREBBP activator protein	NP_006653.2
dd_Smed_v6_8529_0	0.315775	0.389399	1.23315	0.450225	1
dd_Smed_v6_649_0	0.203261	0.253335	1.24635	0.450172	1	col1a1	Maylandia zebra	collagen, type I, alpha 1	XP_004572576.1
dd_Smed_v6_10689_0	0.209033	0.267681	1.28057	0.448439	1	hbs	Drosophila melanogaster	hibris	NP_524702.3
dd_Smed_v6_7379_0	0.594676	0.780001	1.31164	0.448274	1	AaeL	Aedes aegypti	AAEL014668-PA	XP_001649301.1
dd_Smed_v6_2345_0	0.582719	0.662196	1.13639	0.445234	1	ADD	Aplysia californica	nervous system adducin	NP_001191538.1
dd_Smed_v6_4382_0	0.221097	0.288971	1.30698	0.445192	1	LACE1	Homo sapiens	lactation elevated 1	XP_005266942.1
dd_Smed_v6_471_0	0.327252	0.388637	1.18758	0.443443	1	TUBB4B	Homo sapiens	tubulin beta 4B class IVb	NP_006079.1
dd_Smed_v6_12419_0	0.177433	0.237735	1.33986	0.443163	1	MDN1	Homo sapiens	MDN1, midasin homolog (yeast)	NP_055426.1
dd_Smed_v6_9427_0	0.928693	1.06083	1.14229	0.442998	1
dd_Smed_v6_7449_0	0.328177	0.408929	1.24606	0.442428	1	MAN2C1	Homo sapiens	mannosidase alpha class 2C member 1	NP_006706.2
dd_Smed_v6_7735_0	0.173367	0.223107	1.28691	0.442398	1	LOC100116102	Nasonia vitripennis	cAMP-specific 3',5'-cyclic phosphodiesterase, isoform I	XP_008205672.1
dd_Smed_v6_2288_0	0.180781	0.225575	1.24778	0.441487	1	ZRANB1	Homo sapiens	zinc finger RANBP2-type containing 1	NP_060050.2
dd_Smed_v6_2726_0	0.216115	0.267921	1.23971	0.440907	1	AGOS	Ashbya gossypii ATCC 10895	AAL139Cp	NP_982403.1
dd_Smed_v6_3045_0	0.191588	0.238883	1.24685	0.438642	1
dd_Smed_v6_5367_0	0.43494	0.509347	1.17107	0.438161	1	BRD3	Physeter catodon	bromodomain containing 3	XP_007111159.1
dd_Smed_v6_59_0	0.782721	0.881102	1.12569	0.43739	1	CLTC	Homo sapiens	clathrin heavy chain	NP_004850.1
dd_Smed_v6_8879_0	0.483807	0.604612	1.2497	0.436858	1
dd_Smed_v6_2652_0	0.199702	0.244776	1.2257	0.436236	1	VPS35	Homo sapiens	VPS35 retromer complex component	NP_060676.2
dd_Smed_v6_9411_0	0.203902	0.256329	1.25712	0.436047	1	9930021J03Rik	Mus musculus	RIKEN cDNA 9930021J03 gene	XP_006527138.1
dd_Smed_v6_13111_0	0.227998	0.289667	1.27048	0.436046	1	CAMSAP2	Homo sapiens	calmodulin regulated spectrin associated protein family member 2	XP_005245098.1
dd_Smed_v6_5443_0	0.325679	0.38156	1.17158	0.434877	1	SLU7	Homo sapiens	SLU7 homolog, splicing factor	NP_006416.3
dd_Smed_v6_4392_0	1.47292	1.64216	1.1149	0.432348	1	TRAF5	Homo sapiens	TNF receptor-associated factor 5	XP_006711587.1
dd_Smed_v6_8447_0	0.199012	0.263721	1.32515	0.431677	1
dd_Smed_v6_7432_0	0.167966	0.213655	1.27201	0.431649	1	C7orf63	Homo sapiens	chromosome 7 open reading frame 63	NP_001034795.2
dd_Smed_v6_12759_0	0.332506	0.394221	1.1856	0.430257	1	OSBPL2	Homo sapiens	oxysterol binding protein-like 2	NP_055650.1
dd_Smed_v6_1766_0	0.221164	0.280054	1.26627	0.429567	1	UBE2M	Homo sapiens	ubiquitin conjugating enzyme E2 M	NP_003960.1
dd_Smed_v6_1628_0	0.216381	0.270722	1.25113	0.428292	1	DYNC1I1	Homo sapiens	dynein cytoplasmic 1 intermediate chain 1	NP_001129029.1
dd_Smed_v6_2473_0	0.197863	0.24134	1.21973	0.428228	1	SCAMP1	Homo sapiens	secretory carrier membrane protein 1	NP_001277158.1
dd_Smed_v6_9947_0	0.304517	0.394222	1.29458	0.427313	1
dd_Smed_v6_8878_0	0.212326	0.257491	1.21272	0.426779	1
dd_Smed_v6_4871_0	0.454917	0.52503	1.15412	0.426058	1
dd_Smed_v6_14209_0	0.278972	0.344798	1.23596	0.423864	1	PCDH11X	Homo sapiens	protocadherin 11 X-linked	NP_001161833.1
dd_Smed_v6_4767_0	0.344393	0.416418	1.20914	0.423004	1	CNOT4	Homo sapiens	CCR4-NOT transcription complex subunit 4	NP_001008226.1
dd_Smed_v6_4709_0	0.403888	0.469716	1.16299	0.421413	1	LOC101460322	Ceratitis capitata	protein split ends-like	XP_004530297.1
dd_Smed_v6_3422_0	0.213214	0.263207	1.23447	0.420983	1	Cp1	Drosophila melanogaster	Cysteine proteinase-1	NP_725347.1
dd_Smed_v6_255_0	1.27284	1.39864	1.09884	0.419787	1	CALM2	Homo sapiens	calmodulin 2 (phosphorylase kinase, delta)	NP_001734.1
dd_Smed_v6_6615_0	0.20966	0.268679	1.2815	0.418625	1
dd_Smed_v6_2611_0	0.485374	0.559997	1.15374	0.418111	1	PARP3	Homo sapiens	poly (ADP-ribose) polymerase family, member 3	XP_005264836.2
dd_Smed_v6_1407_0	0.287248	0.343582	1.19612	0.418058	1	PPP1CA	Homo sapiens	protein phosphatase 1 catalytic subunit alpha	NP_002699.1
dd_Smed_v6_4425_0	0.563656	0.647801	1.14929	0.417379	1	MARK2	Homo sapiens	MAP/microtubule affinity-regulating kinase 2	XP_006718507.1
dd_Smed_v6_1156_0	0.316996	0.384574	1.21318	0.417354	1	VMP1	Homo sapiens	vacuole membrane protein 1	NP_112200.2
dd_Smed_v6_4866_0	1.11411	1.24511	1.11759	0.415343	1	CDK12	Homo sapiens	cyclin-dependent kinase 12	XP_005257515.1
dd_Smed_v6_6576_0	0.171575	0.216316	1.26076	0.414018	1	LRIG2	Homo sapiens	leucine-rich repeats and immunoglobulin like domains 2	XP_005271426.1
dd_Smed_v6_3954_0	0.285124	0.340972	1.19587	0.413709	1	KDELR2	Homo sapiens	KDEL endoplasmic reticulum protein retention receptor 2	NP_006845.1
dd_Smed_v6_3936_0	0.394368	0.478724	1.2139	0.413098	1
dd_Smed_v6_3473_0	0.237738	0.293415	1.23419	0.412761	1	SMARCA1	Homo sapiens	SWI/SNF related, matrix associated, actin dependent regulator of chromatin, subfamily a, member 1	NP_001269804.1
dd_Smed_v6_10236_0	0.210657	0.262784	1.24745	0.412075	1	LOC100370844	Saccoglossus kowalevskii	coiled-coil domain-containing protein 154-like	XP_006814680.1
dd_Smed_v6_6065_0	0.233813	0.285409	1.22067	0.411146	1	DAB2IP	Pelodiscus sinensis	DAB2 interacting protein	XP_006120875.1
dd_Smed_v6_11823_0	0.205398	0.253187	1.23266	0.410804	1	FZD5	Homo sapiens	frizzled class receptor 5	NP_003459.2
dd_Smed_v6_2561_0	0.287269	0.3438	1.19679	0.408904	1	APP	Homo sapiens	amyloid beta (A4) precursor protein	NP_958817.1
dd_Smed_v6_1087_0	0.956804	1.05881	1.10661	0.407811	1	HSPA4L	Homo sapiens	heat shock protein family A (Hsp70) member 4 like	NP_055093.2
dd_Smed_v6_10186_0	0.377374	0.453387	1.20143	0.407336	1	BBS2	Homo sapiens	Bardet-Biedl syndrome 2	XP_005256138.1
dd_Smed_v6_2082_0	0.183212	0.221172	1.20719	0.407106	1	DDX4	Monodelphis domestica	DEAD (Asp-Glu-Ala-Asp) box polypeptide 4	XP_007486389.1
dd_Smed_v6_9163_0	0.209829	0.256055	1.2203	0.406213	1	LOC101892736	Musca domestica	protein N-terminal glutamine amidohydrolase-like	XP_005186306.1
dd_Smed_v6_6574_0	0.392404	0.454028	1.15704	0.405917	1	Pabpc1	Mus musculus	poly(A) binding protein, cytoplasmic 1	NP_032800.2
dd_Smed_v6_4657_0	0.248616	0.304454	1.22459	0.405523	1
dd_Smed_v6_9988_0	0.231983	0.275675	1.18834	0.40318	1	LOAG	Loa loa	histone methyltransferase	XP_003146871.1
dd_Smed_v6_1310_0	0.556164	0.627607	1.12846	0.401899	1	Pdha1	Mus musculus	pyruvate dehydrogenase E1 alpha 1	NP_032836.1
dd_Smed_v6_2298_0	0.246703	0.292685	1.18639	0.400691	1	SUCLA2	Homo sapiens	succinate-CoA ligase ADP-forming beta subunit	NP_003841.1
dd_Smed_v6_968_0	0.51413	0.584479	1.13683	0.399992	1	CLCA4	Homo sapiens	chloride channel accessory 4	NP_036260.2
dd_Smed_v6_2714_0	0.213294	0.258246	1.21075	0.399767	1	DESI2	Homo sapiens	desumoylating isopeptidase 2	NP_057160.2
dd_Smed_v6_3406_0	0.212305	0.25448	1.19865	0.397003	1	bl	Drosophila melanogaster	bancal	NP_995907.1
dd_Smed_v6_10147_0	0.60653	0.715447	1.17957	0.39579	1	CG13907	Drosophila melanogaster	CG13907 gene product from transcript CG13907-RA	NP_612069.1
dd_Smed_v6_4423_0	0.461272	0.537536	1.16533	0.395649	1	AgaP	Anopheles gambiae str. PEST	AGAP007877-PA	XP_317615.4
dd_Smed_v6_1186_0	0.336535	0.390438	1.16017	0.394851	1	NDUFB9	Homo sapiens	NADH:ubiquinone oxidoreductase subunit B9	NP_004996.1
dd_Smed_v6_10101_0	0.247965	0.29286	1.18105	0.394275	1
dd_Smed_v6_7811_0	0.21746	0.277117	1.27433	0.393596	1	COL4A1	Homo sapiens	collagen, type IV, alpha 1	NP_001836.2
dd_Smed_v6_1417_0	0.338333	0.389504	1.15124	0.393065	1	CALU	Homo sapiens	calumenin	NP_001210.1
dd_Smed_v6_3951_0	0.274339	0.324521	1.18292	0.391563	1	YIF1B	Homo sapiens	Yip1 interacting factor homolog B (S. cerevisiae)	NP_291035.1
dd_Smed_v6_3968_0	0.615071	0.694983	1.12992	0.390118	1	SUPT6H	Homo sapiens	SPT6 homolog, histone chaperone	NP_003161.2
dd_Smed_v6_6939_0	0.589683	0.682641	1.15764	0.388692	1	LOC100374210	Saccoglossus kowalevskii	neuronal acetylcholine receptor subunit alpha-7-like	XP_006811692.1
dd_Smed_v6_1649_0	0.825098	0.955727	1.15832	0.388635	1	Dpse	Drosophila pseudoobscura pseudoobscura	GA20692 gene product from transcript GA20692-RA	XP_001353686.2
dd_Smed_v6_7701_0	0.680306	0.790676	1.16224	0.385425	1	NAV2	Homo sapiens	neuron navigator 2	NP_001104489.1
dd_Smed_v6_7309_0	0.227239	0.281206	1.23749	0.38489	1	SMYD1	Homo sapiens	SET and MYND domain containing 1	XP_005264213.1
dd_Smed_v6_854_0	0.952205	1.04897	1.10162	0.382871	1	DIP2C	Homo sapiens	disco interacting protein 2 homolog C	NP_055789.1
dd_Smed_v6_10941_0	2.08625	2.24796	1.07752	0.381681	1
dd_Smed_v6_4301_0	0.311122	0.377539	1.21348	0.380645	1	AGAP3	Homo sapiens	ArfGAP with GTPase domain, ankyrin repeat and PH domain 3	NP_001268229.1
dd_Smed_v6_21965_0	0.447193	0.528825	1.18254	0.379537	1
dd_Smed_v6_7072_0	0.333901	0.40512	1.21329	0.3791	1	TBC1D13	Homo sapiens	TBC1 domain family, member 13	XP_006717210.1
dd_Smed_v6_1168_0	0.905592	1.00862	1.11377	0.378887	1	MAEA	Homo sapiens	macrophage erythroblast attacher	NP_001017405.1
dd_Smed_v6_4209_0	0.370121	0.431812	1.16668	0.378878	1
dd_Smed_v6_7048_0	0.562115	0.645235	1.14787	0.378	1	HELZ2	Homo sapiens	helicase with zinc finger 2	NP_208384.3
dd_Smed_v6_10967_0	0.26661	0.316083	1.18556	0.375725	1	CCDC57	Latimeria chalumnae	coiled-coil domain containing 57	XP_005989173.1
dd_Smed_v6_4589_0	0.243061	0.287822	1.18416	0.373663	1
dd_Smed_v6_3011_0	1.95531	2.72121	1.3917	0.372798	1
dd_Smed_v6_14659_0	0.218437	0.280748	1.28526	0.372311	1
dd_Smed_v6_16523_0	0.326109	0.377895	1.1588	0.371507	1	HCN1	Homo sapiens	hyperpolarization activated cyclic nucleotide-gated potassium channel 1	NP_066550.2
dd_Smed_v6_3004_0	0.70416	0.779554	1.10707	0.371122	1	KIF5B	Homo sapiens	kinesin family member 5B	NP_004512.1
dd_Smed_v6_4126_0	0.329028	0.394391	1.19865	0.371051	1	ARPP19	Homo sapiens	cAMP regulated phosphoprotein 19kDa	NP_006619.1
dd_Smed_v6_1404_0	0.37097	0.460672	1.2418	0.370962	1	CROCC	Homo sapiens	ciliary rootlet coiled-coil, rootletin	XP_006711119.1
dd_Smed_v6_8839_0	0.421326	0.480814	1.14119	0.370925	1
dd_Smed_v6_885_0	0.173318	0.215201	1.24166	0.370029	1	GYG2	Homo sapiens	glycogenin 2	NP_001171632.1
dd_Smed_v6_1433_0	0.200821	0.241371	1.20192	0.369261	1	VAPA	Homo sapiens	VAMP associated protein A	NP_919415.2
dd_Smed_v6_5645_0	0.147296	0.187035	1.26979	0.368695	1	SH3GLB1	Homo sapiens	SH3-domain GRB2-like endophilin B1	NP_001193581.1
dd_Smed_v6_1398_1	0.335234	0.385554	1.1501	0.368184	1	GPI	Homo sapiens	glucose-6-phosphate isomerase	NP_000166.2
dd_Smed_v6_6172_0	0.276413	0.323603	1.17072	0.368056	1
dd_Smed_v6_5036_0	0.22849	0.266771	1.16754	0.366917	1	ZC3H12C	Homo sapiens	zinc finger CCCH-type containing 12C	XP_005271774.1
dd_Smed_v6_5568_0	0.279004	0.349216	1.25165	0.365888	1	DUS2	Homo sapiens	dihydrouridine synthase 2	NP_060273.1
dd_Smed_v6_13044_0	0.282622	0.365935	1.29479	0.365281	1
dd_Smed_v6_6870_0	0.198018	0.235982	1.19172	0.364793	1
dd_Smed_v6_10024_0	0.231617	0.276165	1.19233	0.364771	1	Znfx1	Mus musculus	zinc finger, NFX1-type containing 1	NP_001278091.1
dd_Smed_v6_7518_0	0.798891	0.932894	1.16774	0.362251	1	GPCPD1	Homo sapiens	glycerophosphocholine phosphodiesterase GDE1 homolog (S. cerevisiae)	NP_062539.1
dd_Smed_v6_7203_0	0.605459	0.693949	1.14615	0.362188	1	Ppip5k2	Mus musculus	diphosphoinositol pentakisphosphate kinase 2	XP_006529552.1
dd_Smed_v6_1197_0	0.211728	0.251304	1.18692	0.36189	1	GLG1	Homo sapiens	golgi glycoprotein 1	NP_036333.2
dd_Smed_v6_6878_0	0.443559	0.497195	1.12092	0.361683	1	RAF1	Homo sapiens	Raf-1 proto-oncogene, serine/threonine kinase	XP_005265416.1
dd_Smed_v6_9272_0	0.221008	0.258372	1.16906	0.361383	1	INSR	Homo sapiens	insulin receptor	XP_006722806.1
dd_Smed_v6_3746_0	0.247817	0.290822	1.17354	0.360981	1
dd_Smed_v6_3718_0	0.348049	0.406875	1.16902	0.360517	1	AOR	Aspergillus oryzae RIB40	gag-pol polyprotein	XP_003189096.1
dd_Smed_v6_7014_0	0.380894	0.438338	1.15081	0.358883	1	LOC100868686	Apis florea	oligopeptidase A-like	XP_003693249.1
dd_Smed_v6_6055_0	0.129239	0.178722	1.38288	0.358277	1	ATRAID	Homo sapiens	all-trans retinoic acid-induced differentiation factor	NP_057169.2
dd_Smed_v6_1449_0	0.349497	0.410055	1.17327	0.357693	1	PSMD3	Homo sapiens	proteasome 26S subunit, non-ATPase 3	NP_002800.2
dd_Smed_v6_4026_0	0.318474	0.374844	1.177	0.356747	1	Gm5806	Mus musculus	predicted gene 5806	XP_006543330.1
dd_Smed_v6_684_0	0.47338	0.539682	1.14006	0.356676	1	ATP6V1B2	Homo sapiens	ATPase H transporting V1 subunit B2	NP_001684.2
dd_Smed_v6_2236_0	0.529726	0.603953	1.14012	0.356554	1	Dgri	Drosophila grimshawi	GH13017 gene product from transcript GH13017-RA	XP_001993524.1
dd_Smed_v6_2943_0	0.887716	0.96768	1.09008	0.356107	1	Casp3	Mus musculus	caspase 3	NP_033940.1
dd_Smed_v6_5675_0	9.35887	9.90943	1.05883	0.35597	1
dd_Smed_v6_8640_0	0.302313	0.35385	1.17048	0.35321	1
dd_Smed_v6_6518_0	0.332657	0.383509	1.15287	0.352698	1	CCDC37	Homo sapiens	coiled-coil domain containing 37	NP_872434.2
dd_Smed_v6_2015_0	0.288557	0.340134	1.17874	0.351938	1	TRAF3	Homo sapiens	TNF receptor associated factor 3	NP_003291.2
dd_Smed_v6_4272_0	0.230357	0.268863	1.16716	0.351624	1	EDF1	Homo sapiens	endothelial differentiation-related factor 1	NP_003783.1
dd_Smed_v6_8703_0	0.244354	0.287577	1.17688	0.351492	1	MAN2A1	Homo sapiens	mannosidase alpha class 2A member 1	NP_002363.2
dd_Smed_v6_806_0	0.531239	0.589262	1.10922	0.350085	1	SEC11C	Homo sapiens	SEC11 homolog C, signal peptidase complex subunit	NP_150596.1
dd_Smed_v6_2933_0	0.161334	0.192088	1.19062	0.349996	1
dd_Smed_v6_4630_0	0.226855	0.273004	1.20343	0.348744	1	4933427G17Rik	Mus musculus	RIKEN cDNA 4933427G17 gene	XP_006508317.1
dd_Smed_v6_4639_0	0.437777	0.545689	1.2465	0.347959	1	DVL2	Homo sapiens	dishevelled segment polarity protein 2	XP_006721532.1
dd_Smed_v6_1680_0	0.214452	0.253312	1.18121	0.347926	1	ALDH3B1	Homo sapiens	aldehyde dehydrogenase 3 family member B1	NP_000685.1
dd_Smed_v6_23_0	1.34549	1.47911	1.09932	0.346019	1	ATP5G2	Homo sapiens	ATP synthase, H transporting, mitochondrial Fo complex subunit C2 (subunit 9)	NP_001002031.1
dd_Smed_v6_8062_0	0.199838	0.234244	1.17217	0.342806	1	ACSS3	Homo sapiens	acyl-CoA synthetase short-chain family member 3	NP_078836.1
dd_Smed_v6_1408_0	0.429378	0.482368	1.12341	0.342052	1
dd_Smed_v6_2630_0	1.00346	1.09495	1.09117	0.34111	1
dd_Smed_v6_7997_1	4.2281	4.60873	1.09003	0.341073	1
dd_Smed_v6_10403_0	0.163037	0.195727	1.2005	0.33948	1	ACA1	Acanthamoeba castellanii str. Neff	Actophorin, putative	XP_004368291.1
dd_Smed_v6_748_0	0.878299	0.955156	1.08751	0.339348	1	SDHC	Homo sapiens	succinate dehydrogenase complex subunit C	NP_002992.1
dd_Smed_v6_11874_0	0.540593	0.6244	1.15503	0.338171	1	PPEF1	Homo sapiens	protein phosphatase with EF-hand domain 1	NP_689410.1
dd_Smed_v6_2769_0	0.404851	0.456281	1.12703	0.338016	1	IGFALS	Ornithorhynchus anatinus	insulin-like growth factor binding protein, acid labile subunit	XP_001520129.3
dd_Smed_v6_3626_0	0.293858	0.338065	1.15044	0.337521	1	LEMD3	Homo sapiens	LEM domain containing 3	NP_001161086.1
dd_Smed_v6_10337_0	0.342708	0.399247	1.16498	0.336318	1	TOMM70A	Homo sapiens	translocase of outer mitochondrial membrane 70 homolog A (S. cerevisiae)	NP_055635.3
dd_Smed_v6_2819_0	0.428937	0.502593	1.17172	0.335878	1	OGT	Homo sapiens	O-linked N-acetylglucosamine (GlcNAc) transferase	XP_006724777.1
dd_Smed_v6_1143_0	0.235365	0.272133	1.15622	0.333669	1	NUDT9	Homo sapiens	nudix hydrolase 9	NP_932155.1
dd_Smed_v6_6376_0	0.226475	0.26273	1.16008	0.333417	1
dd_Smed_v6_5098_0	0.28946	0.335962	1.16065	0.333276	1	IscW	Ixodes scapularis	hypothetical protein	XP_002407163.1
dd_Smed_v6_3743_0	0.405683	0.467202	1.15164	0.329518	1	DDX17	Homo sapiens	DEAD (Asp-Glu-Ala-Asp) box helicase 17	NP_006377.2
dd_Smed_v6_1820_0	0.248146	0.286285	1.1537	0.32918	1	CYFIP2	Homo sapiens	cytoplasmic FMR1 interacting protein 2	NP_055191.2
dd_Smed_v6_3307_0	0.742276	0.815506	1.09866	0.328844	1	SGSM1	Homo sapiens	small G protein signaling modulator 1	NP_001091967.1
dd_Smed_v6_2062_0	0.189283	0.222247	1.17415	0.327676	1	A1O7	Cladophialophora yegresii CBS 114405	carboxymethylenebutenolidase	XP_007761302.1
dd_Smed_v6_4122_0	0.726775	0.831334	1.14387	0.32712	1
dd_Smed_v6_1692_0	3.52704	3.80837	1.07977	0.327004	1	MRPS5	Homo sapiens	mitochondrial ribosomal protein S5	NP_114108.1
dd_Smed_v6_6551_0	0.240975	0.284197	1.17936	0.326679	1
dd_Smed_v6_3351_0	0.924499	1.01515	1.09805	0.325349	1	PTPN23	Homo sapiens	protein tyrosine phosphatase, non-receptor type 23	NP_056281.1
dd_Smed_v6_2806_0	0.259351	0.29889	1.15245	0.325055	1	TM9SF4	Homo sapiens	transmembrane 9 superfamily member 4	NP_055557.2
dd_Smed_v6_6797_0	0.193645	0.22777	1.17622	0.322535	1
dd_Smed_v6_6672_1	0.299285	0.356921	1.19258	0.321747	1	LOC101309867	Fragaria vesca subsp. vesca	probable serine/threonine-protein kinase roco5-like	XP_004287761.1
dd_Smed_v6_7985_0	0.604608	0.671708	1.11098	0.320226	1	CHD9	Homo sapiens	chromodomain helicase DNA binding protein 9	XP_005256232.1
dd_Smed_v6_4779_0	0.61661	0.705943	1.14488	0.319419	1	EPN2	Homo sapiens	epsin 2	NP_683723.2
dd_Smed_v6_11786_0	0.188048	0.225117	1.19712	0.318855	1	PLCXD3	Homo sapiens	phosphatidylinositol specific phospholipase C X domain containing 3	NP_001005473.1
dd_Smed_v6_3685_0	0.433975	0.489395	1.1277	0.318567	1	MARK2	Homo sapiens	microtubule affinity regulating kinase 2	NP_001156768.1
dd_Smed_v6_5865_0	0.900556	1.01318	1.12506	0.317241	1	SMC4	Homo sapiens	structural maintenance of chromosomes 4	NP_001002800.1
dd_Smed_v6_470_0	0.262797	0.300972	1.14526	0.316189	1
dd_Smed_v6_10632_0	0.217042	0.249663	1.1503	0.315875	1	SMG6	Homo sapiens	SMG6, nonsense mediated mRNA decay factor	NP_060045.4
dd_Smed_v6_10700_0	0.225916	0.263799	1.16768	0.313958	1	GPATCH1	Homo sapiens	G-patch domain containing 1	NP_060495.2
dd_Smed_v6_2260_0	0.256412	0.295238	1.15142	0.313658	1
dd_Smed_v6_12059_0	0.205826	0.247468	1.20232	0.312286	1	DAXX	Homo sapiens	death-domain associated protein	NP_001341.1
dd_Smed_v6_10407_0	3.23373	3.4592	1.06972	0.311446	1
dd_Smed_v6_3754_0	0.317858	0.362113	1.13923	0.310579	1	ELMO2	Homo sapiens	engulfment and cell motility 2	XP_005260554.1
dd_Smed_v6_5908_0	0.253025	0.290112	1.14657	0.308678	1
dd_Smed_v6_4612_0	0.357968	0.406983	1.13692	0.308388	1	FNDC3A	Homo sapiens	fibronectin type III domain containing 3A	NP_055738.3
dd_Smed_v6_194_0	0.240348	0.287359	1.19559	0.307983	1	LOC102723843	Homo sapiens	apolipophorins-like	XP_006710064.1
dd_Smed_v6_6425_0	0.560283	0.632958	1.12971	0.306862	1
dd_Smed_v6_7619_0	0.352754	0.404027	1.14535	0.306288	1	NPR1	Homo sapiens	natriuretic peptide receptor 1	NP_000897.3
dd_Smed_v6_2489_0	0.238988	0.280189	1.1724	0.305066	1	TM2D1	Homo sapiens	TM2 domain containing 1	NP_114416.1
dd_Smed_v6_13424_0	0.254866	0.298352	1.17062	0.30252	1	KIF17	Homo sapiens	kinesin family member 17	XP_005246008.1
dd_Smed_v6_8353_0	0.28905	0.342018	1.18325	0.30215	1	UBL5	Homo sapiens	ubiquitin like 5	NP_077268.1
dd_Smed_v6_3002_0	1.2639	1.3664	1.08111	0.302062	1
dd_Smed_v6_8652_0	0.222449	0.254958	1.14614	0.301302	1	Slc7a1	Mus musculus	solute carrier family 7 (cationic amino acid transporter, y system), member 1	NP_031539.3
dd_Smed_v6_8226_0	0.213836	0.246989	1.15504	0.299654	1	CCNY	Homo sapiens	cyclin Y	NP_659449.3
dd_Smed_v6_4339_0	0.197652	0.228983	1.15852	0.298048	1	TPGS1	Alligator mississippiensis	tubulin polyglutamylase complex subunit 1	XP_006268771.1
dd_Smed_v6_6541_0	0.259997	0.298266	1.14719	0.29779	1	EMC1	Homo sapiens	ER membrane protein complex subunit 1	NP_001258357.1
[truncated: 2,162 more rows]

## Sheet: Cl 1.1
	mean.read.count.in.complement.to.Cl.1.1	mean.read.count.in.Cl.1.1	fc	z	lfdr	symbol	species	description	primaryIdentifier
[truncated: 3,772 more rows]

[truncated: 16 more sheets: Cl 1.2, Cl 1.3, Cl 1.4, Cl 1.5, Cl 2.0, Cl 2.1, Cl 3.0, Cl 3.1, Cl 4, Cl 5.0, Cl 5.1, Cl 5.2, Cl 6, Cl 7, Cl 8, Cl 9]
