# Supplementary material for: Smed-pou4-2 regulates mechanosensory neuron regeneration and function in planarians
Source: bioRxiv preprint, doi:10.1101/2025.05.15.654132, version 2 (2025-09-11)
Supplement: Supplementary File S3 [file 654132_file04.xlsx]

## Sheet: All Transcripts
Gene_ID	gfp-d12-4_Raw.Read.Count	gfp-d12-5_Raw.Read.Count	gfp-d12-6_Raw.Read.Count	pou4-2-d12-4_Raw.Read.Count	pou4-2-d12-5_Raw.Read.Count	pou4-2-d12-6_Raw.Read.Count	gfp-d12-4_Normalized.Read.Count	gfp-d12-5_Normalized.Read.Count	gfp-d12-6_Normalized.Read.Count	pou4-2-d12-4_Normalized.Read.Count	pou4-2-d12-5_Normalized.Read.Count	pou4-2-d12-6_Normalized.Read.Count	baseMean	log2FoldChange	lfcSE	stat	pvalue	padj	FC	FC<-1.4	DOWNREG pou4-2 meets FC and p-adj criteria	FC>1.4	UPREG pou4-2 meets FC and p-adj criteria
dd_Smed_v6_1_0_1	51814	53555	37008	49685	50687	64670	52624	49704.5	45454.8	51775	47374.9	55171.8	50350.8	0.0624323	0.0797347	0.783	0.433627	0.999994	1.04422	NO	NO	NO	NO		Color legend:
dd_Smed_v6_10_0_1	3686	4070	3299	4346	4050	7804	3743.62	3777.37	4051.97	4528.81	3785.36	6657.81	4424.16	0.371692	0.196586	1.89073	0.0586597	0.889003	1.29387	NO	NO	NO	NO			= Downregulated
dd_Smed_v6_10_1_1	2253	4676	4131	12411	2440	10119	2288.22	4339.8	5073.87	12933.1	2280.56	8632.8	5924.72	1.02704	0.730914	1.40515	0.159978	0.999994	2.03784	NO	NO	2.03784	NO			= Upregulated
dd_Smed_v6_100_0_1	26478	26704	20605	21475	25247	29271	26891.9	24784	25307.9	22378.3	23597.3	24971.9	24655.2	-0.117718	0.0585389	-2.01094	0.0443316	0.812352	-1.08502	NO	NO	NO	NO
dd_Smed_v6_1000_0_1	411	508	319	417	462	643	417.425	471.476	391.809	434.541	431.811	548.561	449.27	0.143402	0.162171	0.884262	0.376555	0.999994	1.10451	NO	NO	NO	NO
dd_Smed_v6_1000_0_2	3077	3146	2465	2734	3650	4055	3125.1	2919.81	3027.62	2849	3411.49	3459.43	3132.08	0.0999515	0.0944201	1.05858	0.28979	0.999994	1.07174	NO	NO	NO	NO
dd_Smed_v6_10001_0_1	73	62	49	75	68	91	74.1411	57.5423	60.1838	78.1549	63.5566	77.6346	68.5356	0.192466	0.277717	0.69303	0.488291	0.999994	1.14272	NO	NO	NO	NO
dd_Smed_v6_10002_0_1	161	200	150	177	184	205	163.517	185.62	184.236	184.445	171.977	174.891	177.448	-0.00589279	0.162226	-0.0363245	0.971024	0.999994	-1.00409	NO	NO	NO	NO
dd_Smed_v6_100023_0_1	0	0	0	0	0	0	0	0	0	0	0	0	0	#N/A	N/A	N/A	N/A	N/A	#N/A	#N/A	#N/A	#N/A	#N/A
dd_Smed_v6_100026_0_1	0	0	0	0	0	1	0	0	0	0	0	0.853128	0.142188	2.91349	4.80177	0.606754	0.544014	N/A	7.53439	NO	NO	7.53439	NO
dd_Smed_v6_10003_0_1	505	522	408	469	526	614	512.894	484.469	501.123	488.728	491.629	523.821	500.444	0.0068317	0.0982462	0.0695365	0.944563	0.999994	1.00475	NO	NO	NO	NO
dd_Smed_v6_10004_0_1	243	250	188	198	252	274	246.799	232.025	230.909	206.329	235.533	233.757	230.892	-0.069815	0.14645	-0.476716	0.633565	0.999994	-1.04958	NO	NO	NO	NO
dd_Smed_v6_100044_0_1	0	0	0	0	0	0	0	0	0	0	0	0	0	#N/A	N/A	N/A	N/A	N/A	#N/A	#N/A	#N/A	#N/A	#N/A
dd_Smed_v6_100047_0_1	0	0	0	0	0	0	0	0	0	0	0	0	0	#N/A	N/A	N/A	N/A	N/A	#N/A	#N/A	#N/A	#N/A	#N/A
dd_Smed_v6_100048_0_1	0	0	0	0	0	0	0	0	0	0	0	0	0	#N/A	N/A	N/A	N/A	N/A	#N/A	#N/A	#N/A	#N/A	#N/A
dd_Smed_v6_10005_0_1	0	9	0	16	15	19	0	8.35292	0	16.673	14.0198	16.2094	9.2092	2.45479	1.54626	1.58756	0.112385	0.999994	5.48233	NO	NO	5.48233	NO
dd_Smed_v6_10005_0_2	76	106	51	90	107	116	77.188	98.3788	62.6403	93.7858	100.008	98.9628	88.494	0.290887	0.27238	1.06794	0.285547	0.999994	1.22339	NO	NO	NO	NO
dd_Smed_v6_10005_0_4	37	55	35	46	73	46	37.5784	51.0456	42.9885	47.935	68.2299	39.2439	47.8369	0.236767	0.383847	0.616827	0.537349	0.999994	1.17835	NO	NO	NO	NO
dd_Smed_v6_10006_0_1	103	97	69	88	66	98	104.61	90.0259	84.7487	91.7017	61.6873	83.6065	86.0634	-0.240158	0.278105	-0.863552	0.387834	0.999994	-1.18112	NO	NO	NO	NO
dd_Smed_v6_100062_0_1	0	0	1	1	0	0	0	0	1.22824	1.04206	0	0	0.378384	-0.220848	4.20098	-0.0525705	0.958074	N/A	-1.16542	NO	NO	NO	NO
dd_Smed_v6_100065_0_1	1	0	0	0	2	0	1.01563	0	0	0	1.86931	0	0.480824	0.869286	4.13091	0.210435	0.833329	N/A	1.82676	NO	NO	1.82676	NO
dd_Smed_v6_10007_0_1	330	381	311	386	420	459	335.159	353.607	381.983	402.237	392.556	391.586	376.188	0.149682	0.115445	1.29656	0.194782	0.999994	1.10932	NO	NO	NO	NO
dd_Smed_v6_100074_0_1	0	0	0	0	0	0	0	0	0	0	0	0	0	#N/A	N/A	N/A	N/A	N/A	#N/A	#N/A	#N/A	#N/A	#N/A
dd_Smed_v6_100081_0_1	0	0	0	0	1	0	0	0	0	0	0.934656	0	0.155776	3.01414	4.78601	0.62978	0.528838	N/A	8.07877	NO	NO	8.07877	NO
dd_Smed_v6_100082_0_1	1	1	0	1	0	0	1.01563	0.928102	0	1.04206	0	0	0.497633	-0.966665	3.48665	-0.277248	0.78159	N/A	-1.95432	-1.95432	NO	NO	NO
dd_Smed_v6_100086_0_1	0	0	2	1	1	3	0	0	2.45648	1.04206	0.934656	2.55938	1.16543	0.967664	2.32122	0.416878	0.676768	N/A	1.95567	NO	NO	1.95567	NO
dd_Smed_v6_1001_0_1	2469	2643	1865	2297	3068	3214	2507.6	2452.97	2290.67	2393.62	2867.52	2741.95	2542.39	0.142326	0.0915347	1.55489	0.119973	0.999994	1.10368	NO	NO	NO	NO
dd_Smed_v6_10010_0_1	229	217	191	193	232	256	232.58	201.398	234.594	201.118	216.84	218.401	217.489	-0.067771	0.155076	-0.437017	0.662099	0.999994	-1.0481	NO	NO	NO	NO
dd_Smed_v6_10011_0_1	388	599	324	354	398	398	394.065	555.933	397.95	368.891	371.993	339.545	404.73	-0.321433	0.188431	-1.70584	0.0880383	0.999994	-1.24957	NO	NO	NO	NO
dd_Smed_v6_10011_0_2	181	142	132	329	253	173	183.829	131.79	162.128	342.839	236.468	147.591	200.774	0.604459	0.359417	1.68178	0.092612	0.999994	1.52041	NO	NO	1.52041	NO
dd_Smed_v6_100129_0_1	0	2	0	0	0	0	0	1.8562	0	0	0	0	0.309367	-4.18616	4.68779	-0.892993	0.371861	N/A	-18.2037	-18.2037	NO	NO	NO
dd_Smed_v6_10013_0_1	236	266	203	214	259	274	239.689	246.875	249.333	223.002	242.076	233.757	239.122	-0.0733878	0.134717	-0.544754	0.585923	0.999994	-1.05218	NO	NO	NO	NO
dd_Smed_v6_100131_0_1	0	2	0	0	0	0	0	1.8562	0	0	0	0	0.309367	-4.18616	4.68779	-0.892993	0.371861	N/A	-18.2037	-18.2037	NO	NO	NO
dd_Smed_v6_10014_0_1	98	110	68	125	93	86	99.5319	102.091	83.5204	130.258	86.923	73.369	95.9489	0.0210617	0.319699	0.0658797	0.947474	0.999994	1.01471	NO	NO	NO	NO
dd_Smed_v6_100143_0_1	0	0	0	0	0	0	0	0	0	0	0	0	0	#N/A	N/A	N/A	N/A	N/A	#N/A	#N/A	#N/A	#N/A	#N/A
dd_Smed_v6_100149_0_1	0	0	0	0	0	0	0	0	0	0	0	0	0	#N/A	N/A	N/A	N/A	N/A	#N/A	#N/A	#N/A	#N/A	#N/A
dd_Smed_v6_10015_0_1	317	397	270	370	379	353	321.955	368.456	331.625	385.564	354.235	301.154	343.832	0.0236511	0.156951	0.150691	0.88022	0.999994	1.01653	NO	NO	NO	NO
dd_Smed_v6_10016_0_1	482	509	361	552	592	401	489.535	472.404	443.395	575.22	553.316	342.104	479.329	0.064094	0.23039	0.278198	0.78086	0.999994	1.04543	NO	NO	NO	NO
dd_Smed_v6_10016_0_2	0	0	0	0	0	0	0	0	0	0	0	0	0	#N/A	N/A	N/A	N/A	N/A	#N/A	#N/A	#N/A	#N/A	#N/A
dd_Smed_v6_10017_0_1	50	58	42	26	39	48	50.7816	53.8299	51.5862	27.0937	36.4516	40.9501	43.4488	-0.574491	0.339606	-1.69164	0.0907147	0.999994	-1.48915	-1.48915	NO	NO	NO
dd_Smed_v6_100170_0_1	0	0	0	0	0	0	0	0	0	0	0	0	0	#N/A	N/A	N/A	N/A	N/A	#N/A	#N/A	#N/A	#N/A	#N/A
dd_Smed_v6_10018_0_1	71	59	40	100	105	38	72.1099	54.758	49.1297	104.206	98.1389	32.4189	68.4603	0.411953	0.53	0.777269	0.437	0.999994	1.33049	NO	NO	NO	NO
dd_Smed_v6_10018_0_2	380	399	313	283	366	469	385.94	370.313	384.44	294.904	342.084	400.117	362.966	-0.134882	0.160211	-0.841899	0.399844	0.999994	-1.098	NO	NO	NO	NO
dd_Smed_v6_100181_0_1	0	0	0	0	0	0	0	0	0	0	0	0	0	#N/A	N/A	N/A	N/A	N/A	#N/A	#N/A	#N/A	#N/A	#N/A
dd_Smed_v6_100188_0_1	0	0	0	1	0	0	0	0	0	1.04206	0	0	0.173677	3.13559	4.76834	0.657585	0.510805	N/A	8.78834	NO	NO	8.78834	NO
dd_Smed_v6_10019_0_1	111	88	51	62	82	92	112.735	81.673	62.6403	64.608	76.6418	78.4878	79.4643	-0.228464	0.327748	-0.697074	0.485757	0.999994	-1.17159	NO	NO	NO	NO
dd_Smed_v6_100192_0_1	1	0	0	0	1	0	1.01563	0	0	0	0.934656	0	0.325048	-0.12972	4.25555	-0.0304825	0.975682	N/A	-1.09408	NO	NO	NO	NO
dd_Smed_v6_1002_0_1	3403	3713	2946	3128	3719	4756	3456.2	3446.04	3618.4	3259.58	3475.99	4057.48	3552.28	0.037463	0.0960043	0.390222	0.696372	0.999994	1.02631	NO	NO	NO	NO
dd_Smed_v6_10020_0_1	294	284	243	233	333	384	298.596	263.581	298.463	242.801	311.24	327.601	290.38	0.0379063	0.179082	0.211669	0.832365	0.999994	1.02662	NO	NO	NO	NO
dd_Smed_v6_10021_0_1	73	89	64	94	116	147	74.1411	82.6011	78.6075	97.9541	108.42	125.41	94.5223	0.497499	0.234242	2.12387	0.0336808	0.727236	1.41176	NO	NO	1.41176	NO
dd_Smed_v6_100217_0_1	0	0	0	0	0	0	0	0	0	0	0	0	0	#N/A	N/A	N/A	N/A	N/A	#N/A	#N/A	#N/A	#N/A	#N/A
dd_Smed_v6_100219_0_1	1	1	1	0	1	0	1.01563	0.928102	1.22824	0	0.934656	0	0.684439	-1.75346	2.61451	-0.670664	0.502435	N/A	-3.37166	-3.37166	NO	NO	NO
dd_Smed_v6_10022_0_1	272	288	269	304	304	342	276.252	267.293	330.397	316.788	284.135	291.77	294.439	0.0332212	0.15297	0.217174	0.828072	0.999994	1.02329	NO	NO	NO	NO
dd_Smed_v6_100225_0_1	0	1	0	0	0	0	0	0.928102	0	0	0	0	0.154684	-3.20437	4.80681	-0.666631	0.505008	N/A	-9.21747	-9.21747	NO	NO	NO
dd_Smed_v6_100226_0_1	0	0	0	0	0	0	0	0	0	0	0	0	0	#N/A	N/A	N/A	N/A	N/A	#N/A	#N/A	#N/A	#N/A	#N/A
dd_Smed_v6_100232_0_1	1	2	0	0	0	0	1.01563	1.8562	0	0	0	0	0.478639	-4.80372	4.64446	-1.03429	0.301	N/A	-27.9295	-27.9295	NO	NO	NO
dd_Smed_v6_100234_0_1	0	0	0	0	0	0	0	0	0	0	0	0	0	#N/A	N/A	N/A	N/A	N/A	#N/A	#N/A	#N/A	#N/A	#N/A
dd_Smed_v6_10024_0_1	171	184	122	220	210	174	173.673	170.771	149.846	229.254	196.278	148.444	178.044	0.211519	0.235751	0.897213	0.369605	0.999994	1.15791	NO	NO	NO	NO
dd_Smed_v6_10024_0_2	383	419	273	397	377	319	388.987	388.875	335.31	413.7	352.365	272.148	358.564	-0.103447	0.202845	-0.509982	0.610064	0.999994	-1.07434	NO	NO	NO	NO
dd_Smed_v6_10024_0_3	17	36	10	43	29	16	17.2657	33.4117	12.2824	44.8088	27.105	13.65	24.7539	0.428769	0.701759	0.610992	0.541205	0.999994	1.34608	NO	NO	NO	NO
dd_Smed_v6_100246_0_1	0	0	0	0	0	0	0	0	0	0	0	0	0	#N/A	N/A	N/A	N/A	N/A	#N/A	#N/A	#N/A	#N/A	#N/A
dd_Smed_v6_10025_0_1	83	91	64	92	76	106	84.2975	84.4573	78.6075	95.8699	71.0339	90.4316	84.1163	0.0545546	0.250852	0.217477	0.827837	0.999994	1.03854	NO	NO	NO	NO
dd_Smed_v6_10026_0_1	80	102	81	84	90	66	81.2506	94.6664	99.4876	87.5334	84.119	56.3064	83.8939	-0.275321	0.295291	-0.932371	0.351145	0.999994	-1.21026	NO	NO	NO	NO
dd_Smed_v6_100263_0_1	0	1	1	1	0	0	0	0.928102	1.22824	1.04206	0	0	0.533068	-1.08468	3.45583	-0.31387	0.753619	N/A	-2.12091	-2.12091	NO	NO	NO
dd_Smed_v6_100265_0_1	0	0	0	0	0	0	0	0	0	0	0	0	0	#N/A	N/A	N/A	N/A	N/A	#N/A	#N/A	#N/A	#N/A	#N/A
dd_Smed_v6_100266_0_1	2	2	1	3	2	2	2.03126	1.8562	1.22824	3.12619	1.86931	1.70626	1.96958	0.366047	1.35478	0.270189	0.787015	N/A	1.28882	NO	NO	NO	NO
dd_Smed_v6_10027_0_1	274	286	217	245	267	290	278.283	265.437	266.528	255.306	249.553	247.407	260.419	-0.107788	0.127111	-0.847982	0.396448	0.999994	-1.07757	NO	NO	NO	NO
dd_Smed_v6_10027_0_2	0	15	4	0	9	17	0	13.9215	4.91297	0	8.4119	14.5032	6.95826	0.282851	1.93971	0.145821	0.884062	0.999994	1.2166	NO	NO	NO	NO
dd_Smed_v6_100278_0_1	1	0	0	0	0	0	1.01563	0	0	0	0	0	0.169272	-3.30343	4.791	-0.689508	0.490504	N/A	-9.8726	-9.8726	NO	NO	NO
dd_Smed_v6_10028_0_1	54	70	47	72	71	84	54.8441	64.9671	57.7274	75.0287	66.3606	71.6627	65.0984	0.260117	0.261104	0.996219	0.319144	0.999994	1.19758	NO	NO	NO	NO
dd_Smed_v6_10029_0_1	536	572	423	645	685	633	544.379	530.874	519.546	672.132	640.239	540.03	574.533	0.214286	0.125805	1.70332	0.0885083	0.999994	1.16013	NO	NO	NO	NO
dd_Smed_v6_1003_0_1	5545	5693	4704	4349	6421	6717	5631.68	5283.68	5777.65	4531.94	6001.43	5730.46	5492.81	-0.03726	0.115617	-0.322272	0.747247	0.999994	-1.02616	NO	NO	NO	NO
dd_Smed_v6_10030_0_1	0	0	15	13	0	23	0	0	18.4236	13.5468	0	19.6219	8.59873	0.856889	2.59264	0.330508	0.741016	0.999994	1.81113	NO	NO	1.81113	NO
dd_Smed_v6_10030_0_2	16	15	0	0	24	0	16.2501	13.9215	0	0	22.4317	0	8.76723	-0.42973	2.59017	-0.165908	0.868229	0.999994	-1.34698	NO	NO	NO	NO
dd_Smed_v6_10030_0_3	29	0	14	22	44	9	29.4533	0	17.1954	22.9254	41.1249	7.67815	19.7295	0.622466	1.36388	0.456395	0.648106	0.999994	1.5395	NO	NO	1.5395	NO
dd_Smed_v6_10030_0_4	15	34	21	12	8	30	15.2345	31.5555	25.7931	12.5048	7.47725	25.5938	19.6931	-0.665504	0.695396	-0.957013	0.338561	0.999994	-1.58612	-1.58612	NO	NO	NO
dd_Smed_v6_10030_0_5	15	48	0	0	0	53	15.2345	44.5489	0	0	0	45.2158	17.4999	-0.402719	2.58074	-0.156048	0.875995	0.999994	-1.322	NO	NO	NO	NO
dd_Smed_v6_10030_0_6	104	126	111	134	131	119	105.626	116.941	136.335	139.637	122.44	101.522	120.417	0.0188613	0.241281	0.0781715	0.937692	0.999994	1.01316	NO	NO	NO	NO
dd_Smed_v6_100300_0_1	0	0	0	0	0	0	0	0	0	0	0	0	0	#N/A	N/A	N/A	N/A	N/A	#N/A	#N/A	#N/A	#N/A	#N/A
dd_Smed_v6_10031_0_1	226	244	189	218	246	252	229.533	226.457	232.138	227.17	229.925	214.988	226.702	-0.0342633	0.136888	-0.250301	0.802354	0.999994	-1.02403	NO	NO	NO	NO
dd_Smed_v6_10031_0_2	19	39	16	43	35	50	19.297	36.196	19.6519	44.8088	32.713	42.6564	32.5538	0.667007	0.46372	1.43838	0.150326	0.999994	1.58778	NO	NO	1.58778	NO
dd_Smed_v6_100316_0_1	0	0	0	0	0	0	0	0	0	0	0	0	0	#N/A	N/A	N/A	N/A	N/A	#N/A	#N/A	#N/A	#N/A	#N/A
dd_Smed_v6_100318_0_1	0	0	0	0	0	0	0	0	0	0	0	0	0	#N/A	N/A	N/A	N/A	N/A	#N/A	#N/A	#N/A	#N/A	#N/A
dd_Smed_v6_100319_0_1	3	0	0	0	0	0	3.0469	0	0	0	0	0	0.507816	-4.88114	4.64019	-1.05193	0.292833	N/A	-29.4694	-29.4694	NO	NO	NO
dd_Smed_v6_10032_0_1	241	219	177	193	300	280	244.767	203.254	217.399	201.118	280.397	238.876	230.969	0.115959	0.199151	0.582266	0.560388	0.999994	1.08369	NO	NO	NO	NO
dd_Smed_v6_100326_0_1	0	2	0	0	0	0	0	1.8562	0	0	0	0	0.309367	-4.18616	4.68779	-0.892993	0.371861	N/A	-18.2037	-18.2037	NO	NO	NO
dd_Smed_v6_100327_0_1	0	0	3	0	0	0	0	0	3.68473	0	0	0	0.614121	-5.13146	4.62785	-1.10882	0.267507	N/A	-35.0529	-35.0529	NO	NO	NO
dd_Smed_v6_10033_0_1	198	206	198	214	280	290	201.095	191.189	243.192	223.002	261.704	247.407	227.931	0.209073	0.176227	1.18638	0.235472	0.999994	1.15594	NO	NO	NO	NO
dd_Smed_v6_10034_0_1	422	395	297	360	470	460	428.597	366.6	364.788	375.143	439.288	392.439	394.476	0.0569896	0.140197	0.406496	0.684378	0.999994	1.04029	NO	NO	NO	NO
dd_Smed_v6_100347_0_1	0	0	1	0	0	0	0	0	1.22824	0	0	0	0.204707	-3.51601	4.76036	-0.738603	0.460148	N/A	-11.44	-11.44	NO	NO	NO
dd_Smed_v6_10035_0_1	273	302	225	290	286	337	277.268	280.287	276.354	302.199	267.312	287.504	281.821	0.0383676	0.129198	0.296968	0.766491	0.999994	1.02695	NO	NO	NO	NO
dd_Smed_v6_100359_0_1	0	0	1	0	0	0	0	0	1.22824	0	0	0	0.204707	-3.51601	4.76036	-0.738603	0.460148	N/A	-11.44	-11.44	NO	NO	NO
dd_Smed_v6_10036_0_1	146	119	92	166	108	91	148.282	110.444	112.998	172.983	100.943	77.6346	120.547	-0.0838865	0.381038	-0.220153	0.825752	0.999994	-1.05987	NO	NO	NO	NO
dd_Smed_v6_100364_0_1	2	1	0	0	0	0	2.03126	0.928102	0	0	0	0	0.493228	-4.84286	4.64227	-1.04321	0.296852	N/A	-28.6976	-28.6976	NO	NO	NO
dd_Smed_v6_10037_0_1	209	231	187	209	222	237	212.267	214.391	229.681	217.792	207.494	202.191	213.969	-0.0642346	0.143963	-0.446188	0.655461	0.999994	-1.04553	NO	NO	NO	NO
dd_Smed_v6_100370_0_1	0	3	0	2	0	3	0	2.78431	0	2.08413	0	2.55938	1.23797	0.70819	2.91196	0.2432	0.80785	N/A	1.63375	NO	NO	1.63375	NO
dd_Smed_v6_100376_0_1	0	1	0	0	0	0	0	0.928102	0	0	0	0	0.154684	-3.20437	4.80681	-0.666631	0.505008	N/A	-9.21747	-9.21747	NO	NO	NO
dd_Smed_v6_10038_0_1	187	188	149	214	231	176	189.923	174.483	183.008	223.002	215.906	150.151	189.412	0.103796	0.225204	0.460897	0.644872	0.999994	1.0746	NO	NO	NO	NO
dd_Smed_v6_100387_0_1	0	1	0	0	1	1	0	0.928102	0	0	0.934656	0.853128	0.452648	0.902366	3.55679	0.253702	0.799725	N/A	1.86913	NO	NO	1.86913	NO
dd_Smed_v6_10039_0_1	157	145	119	158	162	204	159.454	134.575	146.161	164.646	151.414	174.038	155.048	0.156437	0.18235	0.857895	0.39095	0.999994	1.11453	NO	NO	NO	NO
dd_Smed_v6_1004_0_1	4343	4476	3613	3963	4611	5305	4410.89	4154.18	4437.64	4129.7	4309.7	4525.84	4327.99	-0.00338778	0.0586956	-0.0577177	0.953973	0.999994	-1.00235	NO	NO	NO	NO
dd_Smed_v6_10040_0_1	1	0	0	15	2	8	1.01563	0	0	15.631	1.86931	6.82502	4.22349	4.54697	2.01354	2.2582	0.0239331	N/A	23.3762	NO	NO	23.3762	NO
dd_Smed_v6_10040_0_2	47	40	35	42	44	55	47.7347	37.1241	42.9885	43.7667	41.1249	46.922	43.2768	0.0470242	0.321448	0.146289	0.883694	0.999994	1.03313	NO	NO	NO	NO
dd_Smed_v6_10040_0_3	4	22	8	0	14	0	4.06253	20.4182	9.82593	0	13.0852	0	7.89865	-1.39116	1.91498	-0.726463	0.467555	0.999994	-2.6229	-2.6229	NO	NO	NO
dd_Smed_v6_10040_0_4	5	2	0	0	0	11	5.07816	1.8562	0	0	0	9.38441	2.7198	0.436957	2.79502	0.156334	0.87577	N/A	1.35375	NO	NO	NO	NO
dd_Smed_v6_10040_0_5	0	1	4	0	0	0	0	0.928102	4.91297	0	0	0	0.973512	-5.80347	4.21332	-1.37741	0.168385	N/A	-55.8495	-55.8495	NO	NO	NO
dd_Smed_v6_10040_0_6	0	0	0	0	0	0	0	0	0	0	0	0	0	#N/A	N/A	N/A	N/A	N/A	#N/A	#N/A	#N/A	#N/A	#N/A
dd_Smed_v6_10040_0_7	0	9	2	0	0	5	0	8.35292	2.45648	0	0	4.26564	2.51251	-1.32999	2.74206	-0.485035	0.627652	N/A	-2.51401	-2.51401	NO	NO	NO
dd_Smed_v6_10040_0_8	2	0	0	8	0	0	2.03126	0	0	8.33652	0	0	1.72796	2.02475	3.8971	0.519554	0.603374	N/A	4.06922	NO	NO	4.06922	NO
dd_Smed_v6_10041_0_1	481	510	475	490	525	652	488.519	473.332	583.415	510.612	490.694	556.239	517.135	0.0144304	0.135016	0.106879	0.914885	0.999994	1.01005	NO	NO	NO	NO
dd_Smed_v6_10042_0_1	570	625	463	586	630	755	578.91	580.064	568.676	610.65	588.833	644.112	595.207	0.0938991	0.0913472	1.02794	0.30398	0.999994	1.06725	NO	NO	NO	NO
dd_Smed_v6_100427_0_1	0	0	0	0	0	1	0	0	0	0	0	0.853128	0.142188	2.91349	4.80177	0.606754	0.544014	N/A	7.53439	NO	NO	7.53439	NO
dd_Smed_v6_10043_0_1	109	118	82	107	90	98	110.704	109.516	100.716	111.501	84.119	83.6065	100.027	-0.206031	0.240117	-0.858046	0.390867	0.999994	-1.15351	NO	NO	NO	NO
dd_Smed_v6_10044_0_1	11	25	21	13	14	39	11.172	23.2025	25.7931	13.5468	13.0852	33.272	20.0119	0.0032204	0.685968	0.00469468	0.996254	0.999994	1.00223	NO	NO	NO	NO
dd_Smed_v6_10044_0_2	392	590	323	328	374	458	398.128	547.58	396.722	341.797	349.561	390.733	404.087	-0.312255	0.185903	-1.67967	0.0930218	0.999994	-1.24165	NO	NO	NO	NO
dd_Smed_v6_10045_0_1	348	321	335	356	394	412	353.44	297.921	411.461	370.975	368.254	351.489	358.923	0.0403408	0.164979	0.244521	0.806827	0.999994	1.02836	NO	NO	NO	NO
dd_Smed_v6_100457_0_1	0	0	0	0	0	0	0	0	0	0	0	0	0	#N/A	N/A	N/A	N/A	N/A	#N/A	#N/A	#N/A	#N/A	#N/A
dd_Smed_v6_100458_0_1	0	0	0	0	0	0	0	0	0	0	0	0	0	#N/A	N/A	N/A	N/A	N/A	#N/A	#N/A	#N/A	#N/A	#N/A
dd_Smed_v6_10046_0_1	176	210	172	174	213	261	178.751	194.901	211.258	181.319	199.082	222.666	197.996	0.0480973	0.175642	0.273837	0.78421	0.999994	1.0339	NO	NO	NO	NO
dd_Smed_v6_10047_0_1	68	52	47	69	52	64	69.063	48.2613	57.7274	71.9025	48.6021	54.6002	58.3594	-0.00129361	0.334172	-0.0038711	0.996911	0.999994	-1.0009	NO	NO	NO	NO
dd_Smed_v6_10048_0_1	421	496	355	491	608	589	427.581	460.338	436.026	511.654	568.271	502.492	484.394	0.256444	0.110989	2.31053	0.0208587	0.558318	1.19453	NO	NO	NO	NO
dd_Smed_v6_100481_0_1	0	1	0	0	1	0	0	0.928102	0	0	0.934656	0	0.31046	-0.0306605	4.27335	-0.00717482	0.994275	N/A	-1.02148	NO	NO	NO	NO
dd_Smed_v6_100485_0_1	0	0	0	1	0	0	0	0	0	1.04206	0	0	0.173677	3.13559	4.76834	0.657585	0.510805	N/A	8.78834	NO	NO	8.78834	NO
dd_Smed_v6_10049_0_1	298	315	222	280	338	331	302.658	292.352	272.67	291.778	315.914	282.385	292.96	0.0348193	0.132243	0.263298	0.792321	0.999994	1.02443	NO	NO	NO	NO
dd_Smed_v6_1005_0_1	1198	1225	1073	979	1135	1105	1216.73	1136.92	1317.9	1020.18	1060.83	942.706	1115.88	-0.279229	0.0974078	-2.8666	0.00414902	0.22951	-1.21355	NO	NO	NO	NO
dd_Smed_v6_10050_0_1	27	24	19	27	41	30	27.4221	22.2744	23.3366	28.1357	38.3209	25.5938	27.5139	0.333126	0.424049	0.785583	0.432112	0.999994	1.25974	NO	NO	NO	NO
dd_Smed_v6_10051_0_1	25	42	44	34	49	50	25.3908	38.9803	54.0426	35.4302	45.7981	42.6564	40.3831	0.0737859	0.429894	0.171638	0.863722	0.999994	1.05247	NO	NO	NO	NO
dd_Smed_v6_10051_0_2	313	358	310	331	400	398	317.893	332.26	380.755	344.923	373.862	339.545	348.206	0.0404203	0.135991	0.297228	0.766292	0.999994	1.02841	NO	NO	NO	NO
dd_Smed_v6_100519_0_1	0	0	0	1	0	0	0	0	0	1.04206	0	0	0.173677	3.13559	4.76834	0.657585	0.510805	N/A	8.78834	NO	NO	8.78834	NO
dd_Smed_v6_10052_0_1	159	165	123	148	169	207	161.485	153.137	151.074	154.226	157.957	176.597	159.079	0.0709937	0.171213	0.414651	0.678398	0.999994	1.05044	NO	NO	NO	NO
dd_Smed_v6_100524_0_1	0	0	0	0	0	0	0	0	0	0	0	0	0	#N/A	N/A	N/A	N/A	N/A	#N/A	#N/A	#N/A	#N/A	#N/A
dd_Smed_v6_10053_0_1	184	187	132	169	154	204	186.876	173.555	162.128	176.109	143.937	174.038	169.441	-0.0826962	0.184608	-0.447956	0.654185	0.999994	-1.059	NO	NO	NO	NO
dd_Smed_v6_10054_0_1	263	272	184	217	234	267	267.111	252.444	225.996	226.128	218.71	227.785	236.362	-0.150956	0.146276	-1.03199	0.302075	0.999994	-1.11031	NO	NO	NO	NO
dd_Smed_v6_10055_0_1	139	167	130	156	198	182	141.173	154.993	159.671	162.562	185.062	155.269	159.788	0.142481	0.180992	0.78722	0.431153	0.999994	1.1038	NO	NO	NO	NO
dd_Smed_v6_100558_0_1	3	0	0	0	0	0	3.0469	0	0	0	0	0	0.507816	-4.88114	4.64019	-1.05193	0.292833	N/A	-29.4694	-29.4694	NO	NO	NO
dd_Smed_v6_10056_0_1	208	187	160	173	202	247	211.251	173.555	196.519	180.277	188.801	210.723	193.521	-0.000758721	0.175386	-0.00432601	0.996548	0.999994	-1.00053	NO	NO	NO	NO
dd_Smed_v6_100573_0_1	0	0	0	0	0	0	0	0	0	0	0	0	0	#N/A	N/A	N/A	N/A	N/A	#N/A	#N/A	#N/A	#N/A	#N/A
dd_Smed_v6_100575_0_1	0	0	1	0	0	0	0	0	1.22824	0	0	0	0.204707	-3.51601	4.76036	-0.738603	0.460148	N/A	-11.44	-11.44	NO	NO	NO
dd_Smed_v6_10058_0_1	500	479	428	525	525	513	507.816	444.561	525.688	547.084	490.694	437.655	492.25	-0.00248198	0.14374	-0.0172672	0.986223	0.999994	-1.00172	NO	NO	NO	NO
dd_Smed_v6_10059_0_1	322	349	303	310	287	347	327.034	323.908	372.157	323.04	268.246	296.035	318.403	-0.204277	0.146571	-1.39371	0.163406	0.999994	-1.15211	NO	NO	NO	NO
dd_Smed_v6_1006_0_1	4201	4615	3411	3901	5470	6062	4266.67	4283.19	4189.53	4065.09	5112.57	5171.66	4514.79	0.171925	0.10479	1.64065	0.10087	0.999994	1.12656	NO	NO	NO	NO
dd_Smed_v6_10060_0_1	85	102	74	66	69	87	86.3287	94.6664	90.8899	68.7763	64.4913	74.2221	79.8958	-0.389277	0.233439	-1.66758	0.0954001	0.999994	-1.30974	NO	NO	NO	NO
dd_Smed_v6_10061_0_1	269	317	241	276	307	385	273.205	294.208	296.006	287.61	286.939	328.454	294.404	0.0666084	0.137134	0.485716	0.627169	0.999994	1.04725	NO	NO	NO	NO
dd_Smed_v6_100615_0_1	0	0	0	0	0	0	0	0	0	0	0	0	0	#N/A	N/A	N/A	N/A	N/A	#N/A	#N/A	#N/A	#N/A	#N/A
dd_Smed_v6_10062_0_1	733	802	604	742	808	843	744.458	744.338	741.858	773.212	755.202	719.187	746.376	0.00989759	0.0802751	0.123296	0.901873	0.999994	1.00688	NO	NO	NO	NO
dd_Smed_v6_100629_0_1	1	0	1	0	0	2	1.01563	0	1.22824	0	0	1.70626	0.658355	-0.348784	3.32253	-0.104975	0.916395	N/A	-1.27349	NO	NO	NO	NO
dd_Smed_v6_10064_0_1	209	181	149	164	234	293	212.267	167.986	183.008	170.899	218.71	249.966	200.473	0.185803	0.225302	0.824683	0.409551	0.999994	1.13745	NO	NO	NO	NO
dd_Smed_v6_100647_0_1	0	1	0	2	0	0	0	0.928102	0	2.08413	0	0	0.502039	1.10543	4.13778	0.267154	0.78935	N/A	2.15162	NO	NO	2.15162	NO
dd_Smed_v6_10065_0_1	398	449	344	419	505	565	404.222	416.718	422.515	436.625	472.001	482.017	439.016	0.163116	0.10629	1.53463	0.124875	0.999994	1.1197	NO	NO	NO	NO
dd_Smed_v6_100650_0_1	0	0	0	0	0	0	0	0	0	0	0	0	0	#N/A	N/A	N/A	N/A	N/A	#N/A	#N/A	#N/A	#N/A	#N/A
dd_Smed_v6_100658_0_1	0	2	0	1	0	1	0	1.8562	0	1.04206	0	0.853128	0.625233	-0.00949943	3.34303	-0.00284156	0.997733	N/A	-1.00661	NO	NO	NO	NO
dd_Smed_v6_10066_0_1	521	621	460	543	544	632	529.144	576.351	564.991	565.841	508.453	539.177	547.326	-0.0507502	0.102288	-0.496148	0.61979	0.999994	-1.0358	NO	NO	NO	NO
dd_Smed_v6_100663_0_1	0	0	0	0	0	0	0	0	0	0	0	0	0	#N/A	N/A	N/A	N/A	N/A	#N/A	#N/A	#N/A	#N/A	#N/A
dd_Smed_v6_10067_0_1	8	10	12	8	8	9	8.12506	9.28102	14.7389	8.33652	7.47725	7.67815	9.27282	-0.441592	0.686819	-0.642953	0.520255	0.999994	-1.3581	NO	NO	NO	NO
dd_Smed_v6_10068_0_1	103	141	109	109	140	134	104.61	130.862	133.878	113.585	130.852	114.319	121.351	-0.0404038	0.217499	-0.185765	0.852629	0.999994	-1.0284	NO	NO	NO	NO
dd_Smed_v6_10069_0_1	405	412	322	403	401	432	411.331	382.378	395.494	419.952	374.797	368.551	392.084	-0.0330156	0.119629	-0.275983	0.782561	0.999994	-1.02315	NO	NO	NO	NO
dd_Smed_v6_100699_0_1	0	0	0	2	0	0	0	0	0	2.08413	0	0	0.347355	4.15022	4.66537	0.88958	0.373691	N/A	17.7558	NO	NO	17.7558	NO
dd_Smed_v6_1007_0_1	2506	2561	2088	2092	2482	3108	2545.17	2376.87	2564.57	2180	2319.82	2651.52	2439.66	-0.0652308	0.0948781	-0.687522	0.491754	0.999994	-1.04625	NO	NO	NO	NO
dd_Smed_v6_10070_0_1	389	424	309	375	411	461	395.081	393.515	379.527	390.774	384.144	393.292	389.389	-0.000764572	0.10427	-0.00733264	0.994149	0.999994	-1.00053	NO	NO	NO	NO
dd_Smed_v6_100703_0_1	0	0	0	1	0	0	0	0	0	1.04206	0	0	0.173677	3.13559	4.76834	0.657585	0.510805	N/A	8.78834	NO	NO	8.78834	NO
dd_Smed_v6_100708_0_1	0	0	0	0	0	0	0	0	0	0	0	0	0	#N/A	N/A	N/A	N/A	N/A	#N/A	#N/A	#N/A	#N/A	#N/A
dd_Smed_v6_100712_0_1	0	0	0	0	0	0	0	0	0	0	0	0	0	#N/A	N/A	N/A	N/A	N/A	#N/A	#N/A	#N/A	#N/A	#N/A
dd_Smed_v6_10072_0_1	626	668	495	661	716	710	635.786	619.972	607.98	688.805	669.214	605.721	637.913	0.0736849	0.0983461	0.749241	0.453712	0.999994	1.0524	NO	NO	NO	NO
dd_Smed_v6_10073_0_1	196	273	139	200	211	231	199.064	253.372	170.726	208.413	197.212	197.073	204.31	-0.0526824	0.210172	-0.250664	0.802074	0.999994	-1.03719	NO	NO	NO	NO
dd_Smed_v6_10073_0_2	94	105	106	90	131	178	95.4694	97.4507	130.194	93.7858	122.44	151.857	115.199	0.194457	0.29546	0.658151	0.510441	0.999994	1.14429	NO	NO	NO	NO
dd_Smed_v6_10074_0_1	315	325	285	282	352	379	319.924	301.633	350.049	293.862	328.999	323.335	319.634	-0.0345609	0.134735	-0.25651	0.797557	0.999994	-1.02425	NO	NO	NO	NO
dd_Smed_v6_10075_0_1	368	385	310	390	426	399	373.753	357.319	380.755	406.405	398.163	340.398	376.132	0.0416611	0.131502	0.31681	0.751388	0.999994	1.0293	NO	NO	NO	NO
dd_Smed_v6_10076_0_1	14	18	16	22	26	28	14.2188	16.7058	19.6519	22.9254	24.3011	23.8876	20.2818	0.49834	0.45742	1.08946	0.275952	0.999994	1.41259	NO	NO	1.41259	NO
dd_Smed_v6_10078_0_1	327	132	80	235	259	287	332.112	122.509	98.2593	244.885	242.076	244.848	214.115	0.403409	0.47834	0.843352	0.399031	0.999994	1.32263	NO	NO	NO	NO
dd_Smed_v6_10078_0_2	34	226	195	52	90	146	34.5315	209.751	239.507	54.1874	84.119	124.557	124.442	-0.878266	0.702598	-1.25003	0.21129	0.999994	-1.83817	-1.83817	NO	NO	NO
dd_Smed_v6_100786_0_1	0	0	0	0	0	0	0	0	0	0	0	0	0	#N/A	N/A	N/A	N/A	N/A	#N/A	#N/A	#N/A	#N/A	#N/A
dd_Smed_v6_10079_0_1	320	339	267	282	321	410	325.002	314.626	327.941	293.862	300.025	349.782	318.54	-0.033617	0.137209	-0.245007	0.806451	0.999994	-1.02358	NO	NO	NO	NO
dd_Smed_v6_100790_0_1	1	0	0	0	1	0	1.01563	0	0	0	0.934656	0	0.325048	-0.12972	4.25555	-0.0304825	0.975682	N/A	-1.09408	NO	NO	NO	NO
dd_Smed_v6_100792_0_1	0	0	0	0	0	0	0	0	0	0	0	0	0	#N/A	N/A	N/A	N/A	N/A	#N/A	#N/A	#N/A	#N/A	#N/A
dd_Smed_v6_100799_0_1	0	0	0	2	3	1	0	0	0	2.08413	2.80397	0.853128	0.956871	5.62625	3.34364	1.68267	0.0924387	N/A	49.3934	NO	NO	49.3934	NO
dd_Smed_v6_1008_0_1	4526	4366	3761	3921	3932	4351	4596.75	4052.09	4619.42	4085.94	3675.07	3711.96	4123.54	-0.209613	0.0810981	-2.58469	0.00974672	0.361591	-1.15638	NO	NO	NO	NO
dd_Smed_v6_10081_0_1	68	70	48	58	76	100	69.063	64.9671	58.9556	60.4398	71.0339	85.3128	68.2954	0.169324	0.283317	0.59765	0.550073	0.999994	1.12453	NO	NO	NO	NO
dd_Smed_v6_100811_0_1	0	1	0	0	0	0	0	0.928102	0	0	0	0	0.154684	-3.20437	4.80681	-0.666631	0.505008	N/A	-9.21747	-9.21747	NO	NO	NO
dd_Smed_v6_10082_0_1	314	378	290	302	349	318	318.908	350.822	356.19	314.704	326.195	271.295	323.019	-0.170267	0.143176	-1.18922	0.234354	0.999994	-1.12527	NO	NO	NO	NO
dd_Smed_v6_10082_0_2	45	49	48	92	66	92	45.7034	45.477	58.9556	95.8699	61.6873	78.4878	64.3635	0.656169	0.32568	2.01477	0.043929	0.812108	1.57589	NO	NO	1.57589	NO
dd_Smed_v6_10082_0_3	12	18	13	31	12	34	12.1876	16.7058	15.9671	32.304	11.2159	29.0063	19.5645	0.692002	0.628606	1.10085	0.270961	0.999994	1.61552	NO	NO	1.61552	NO
dd_Smed_v6_100829_0_1	0	0	0	0	0	0	0	0	0	0	0	0	0	#N/A	N/A	N/A	N/A	N/A	#N/A	#N/A	#N/A	#N/A	#N/A
dd_Smed_v6_10083_0_1	122	163	147	128	127	194	123.907	151.281	180.552	133.384	118.701	165.507	145.555	-0.121995	0.256477	-0.475658	0.634318	0.999994	-1.08824	NO	NO	NO	NO
dd_Smed_v6_100839_0_1	1	1	0	0	0	0	1.01563	0.928102	0	0	0	0	0.323956	-4.24305	4.683	-0.906055	0.364907	N/A	-18.9359	-18.9359	NO	NO	NO
dd_Smed_v6_10084_0_1	0	0	0	0	0	0	0	0	0	0	0	0	0	#N/A	N/A	N/A	N/A	N/A	#N/A	#N/A	#N/A	#N/A	#N/A
dd_Smed_v6_10084_0_2	18	4	4	3	11	5	18.2814	3.71241	4.91297	3.12619	10.2812	4.26564	7.42997	-0.606647	1.06902	-0.56748	0.570388	0.999994	-1.52272	-1.52272	NO	NO	NO
dd_Smed_v6_10084_0_3	0	0	0	0	0	0	0	0	0	0	0	0	0	#N/A	N/A	N/A	N/A	N/A	#N/A	#N/A	#N/A	#N/A	#N/A
dd_Smed_v6_10084_0_4	22	22	18	14	30	21	22.3439	20.4182	22.1084	14.5889	28.0397	17.9157	20.9025	-0.0958276	0.503476	-0.190332	0.849049	0.999994	-1.06868	NO	NO	NO	NO
dd_Smed_v6_10084_0_5	5	16	11	13	5	9	5.07816	14.8496	13.5107	13.5468	4.67328	7.67815	9.88945	-0.375036	0.834642	-0.449337	0.653188	0.999994	-1.29687	NO	NO	NO	NO
dd_Smed_v6_100841_0_1	0	0	0	1	0	0	0	0	0	1.04206	0	0	0.173677	3.13559	4.76834	0.657585	0.510805	N/A	8.78834	NO	NO	8.78834	NO
dd_Smed_v6_100848_0_1	0	0	0	0	0	0	0	0	0	0	0	0	0	#N/A	N/A	N/A	N/A	N/A	#N/A	#N/A	#N/A	#N/A	#N/A
dd_Smed_v6_10086_0_1	326	357	197	386	336	312	331.096	331.332	241.964	402.237	314.044	266.176	314.475	0.115994	0.235801	0.491915	0.62278	0.999994	1.08372	NO	NO	NO	NO
dd_Smed_v6_100866_0_1	0	0	0	0	0	0	0	0	0	0	0	0	0	#N/A	N/A	N/A	N/A	N/A	#N/A	#N/A	#N/A	#N/A	#N/A
dd_Smed_v6_10087_0_1	502	581	399	456	519	541	509.847	539.227	490.068	475.181	485.086	461.542	493.492	-0.116521	0.100403	-1.16053	0.245832	0.999994	-1.08412	NO	NO	NO	NO
dd_Smed_v6_10088_0_1	47	74	42	57	62	66	47.7347	68.6795	51.5862	59.3977	57.9487	56.3064	56.9422	0.0424598	0.304078	0.139635	0.888949	0.999994	1.02987	NO	NO	NO	NO
dd_Smed_v6_10089_0_1	141	151	135	149	173	169	143.204	140.143	165.813	155.268	161.695	144.179	151.717	0.0408319	0.182253	0.22404	0.822726	0.999994	1.02871	NO	NO	NO	NO
dd_Smed_v6_1009_0_1	2355	2534	2029	2096	2402	2886	2391.81	2351.81	2492.1	2184.17	2245.04	2462.13	2354.51	-0.0692177	0.0713532	-0.970072	0.33201	0.999994	-1.04915	NO	NO	NO	NO
dd_Smed_v6_1009_1_1	426	411	371	426	433	508	432.659	381.45	455.678	443.92	404.706	433.389	425.3	0.0159633	0.126314	0.126378	0.899433	0.999994	1.01113	NO	NO	NO	NO
dd_Smed_v6_10090_0_1	77	78	59	58	65	67	78.2037	72.3919	72.4663	60.4398	60.7526	57.1596	66.9023	-0.324012	0.248619	-1.30325	0.19249	0.999994	-1.25181	NO	NO	NO	NO
dd_Smed_v6_10092_0_1	337	411	311	388	468	552	342.268	381.45	381.983	404.321	437.419	470.927	403.061	0.249405	0.127131	1.9618	0.0497856	0.847377	1.18872	NO	NO	NO	NO
dd_Smed_v6_100927_0_1	2	0	0	0	0	0	2.03126	0	0	0	0	0	0.338544	-4.29832	4.67852	-0.918736	0.358234	N/A	-19.6754	-19.6754	NO	NO	NO
dd_Smed_v6_100929_0_1	0	0	0	0	0	0	0	0	0	0	0	0	0	#N/A	N/A	N/A	N/A	N/A	#N/A	#N/A	#N/A	#N/A	#N/A
dd_Smed_v6_10093_0_1	121	141	91	115	126	161	122.891	130.862	111.77	119.837	117.767	137.354	123.414	0.0353134	0.201184	0.175528	0.860665	0.999994	1.02478	NO	NO	NO	NO
dd_Smed_v6_10093_0_2	16	16	2	14	22	9	16.2501	14.8496	2.45648	14.5889	20.5624	7.67815	12.731	0.335925	0.897883	0.37413	0.708308	0.999994	1.26219	NO	NO	NO	NO
dd_Smed_v6_100930_0_1	0	0	0	0	0	0	0	0	0	0	0	0	0	#N/A	N/A	N/A	N/A	N/A	#N/A	#N/A	#N/A	#N/A	#N/A
dd_Smed_v6_100932_0_1	0	0	1	0	0	0	0	0	1.22824	0	0	0	0.204707	-3.51601	4.76036	-0.738603	0.460148	N/A	-11.44	-11.44	NO	NO	NO
dd_Smed_v6_10094_0_1	340	359	231	289	361	351	345.315	333.189	283.724	301.157	337.411	299.448	316.707	-0.0393164	0.147681	-0.266225	0.790066	0.999994	-1.02763	NO	NO	NO	NO
dd_Smed_v6_100945_0_1	1	0	0	0	0	1	1.01563	0	0	0	0	0.853128	0.31146	-0.230366	4.27327	-0.0539086	0.957008	N/A	-1.17313	NO	NO	NO	NO
dd_Smed_v6_10095_0_1	224	275	191	230	278	325	227.502	255.228	234.594	239.675	259.834	277.267	249.017	0.115284	0.147276	0.782772	0.433761	0.999994	1.08319	NO	NO	NO	NO
dd_Smed_v6_100951_0_1	0	0	0	0	0	0	0	0	0	0	0	0	0	#N/A	N/A	N/A	N/A	N/A	#N/A	#N/A	#N/A	#N/A	#N/A
dd_Smed_v6_100959_0_1	0	0	0	0	0	2	0	0	0	0	0	1.70626	0.284376	3.89923	4.68472	0.832329	0.405223	N/A	14.9206	NO	NO	14.9206	NO
dd_Smed_v6_10096_0_1	348	369	325	287	371	463	353.44	342.47	399.179	299.073	346.757	394.998	355.986	-0.0697717	0.164588	-0.423918	0.671625	0.999994	-1.04955	NO	NO	NO	NO
dd_Smed_v6_100966_0_1	0	0	0	0	0	0	0	0	0	0	0	0	0	#N/A	N/A	N/A	N/A	N/A	#N/A	#N/A	#N/A	#N/A	#N/A
dd_Smed_v6_100967_0_1	1	1	0	1	0	0	1.01563	0.928102	0	1.04206	0	0	0.497633	-0.966665	3.48665	-0.277248	0.78159	N/A	-1.95432	-1.95432	NO	NO	NO
dd_Smed_v6_10097_0_1	338	334	289	292	401	457	343.284	309.986	354.962	304.283	374.797	389.879	346.198	0.0875742	0.158974	0.55087	0.581723	0.999994	1.06258	NO	NO	NO	NO
dd_Smed_v6_10098_0_1	12	12	8	17	12	8	12.1876	11.1372	9.82593	17.7151	11.2159	6.82502	11.4845	0.095393	0.682594	0.139751	0.888857	0.999994	1.06836	NO	NO	NO	NO
dd_Smed_v6_10098_0_2	153	180	151	152	181	193	155.392	167.058	185.465	158.394	169.173	164.654	166.689	-0.0419423	0.170642	-0.245791	0.805844	0.999994	-1.0295	NO	NO	NO	NO
dd_Smed_v6_100981_0_1	0	0	0	0	0	0	0	0	0	0	0	0	0	#N/A	N/A	N/A	N/A	N/A	#N/A	#N/A	#N/A	#N/A	#N/A
dd_Smed_v6_10099_0_1	133	138	122	112	150	167	135.079	128.078	149.846	116.711	140.198	142.472	135.397	-0.0430825	0.200542	-0.214831	0.829899	0.999994	-1.03031	NO	NO	NO	NO
dd_Smed_v6_100994_0_1	0	0	1	0	0	0	0	0	1.22824	0	0	0	0.204707	-3.51601	4.76036	-0.738603	0.460148	N/A	-11.44	-11.44	NO	NO	NO
dd_Smed_v6_100999_0_1	0	0	0	0	0	2	0	0	0	0	0	1.70626	0.284376	3.89923	4.68472	0.832329	0.405223	N/A	14.9206	NO	NO	14.9206	NO
dd_Smed_v6_101_0_1	5	29	52	70	30	60	5.07816	26.915	63.8686	72.9445	28.0397	51.1877	41.3389	0.671869	0.882799	0.761067	0.446617	0.999994	1.59314	NO	NO	1.59314	NO
dd_Smed_v6_101_0_2	2596	2603	2024	2151	2052	2374	2636.58	2415.85	2485.96	2241.48	1917.91	2025.33	2287.19	-0.285992	0.0842464	-3.39471	0.000687004	0.0786264	-1.21925	NO	NO	NO	NO
dd_Smed_v6_101_0_3	6345	5793	4831	5857	5825	6282	6444.19	5376.49	5933.64	6103.37	5444.37	5359.35	5776.9	-0.0706075	0.0917061	-0.769933	0.44134	0.999994	-1.05016	NO	NO	NO	NO
dd_Smed_v6_101_0_4	442	231	126	0	35	21	448.909	214.391	154.758	0	32.713	17.9157	144.781	-4.01014	1.00387	-3.99468	6.47808e-05	0.0144717	-16.1129	-16.1129	YES	NO	NO
dd_Smed_v6_1010_0_1	5133	5186	4518	4869	5961	7033	5213.24	4813.14	5549.2	5073.81	5571.48	6000.05	5370.15	0.0964163	0.0888523	1.08513	0.277864	0.999994	1.06911	NO	NO	NO	NO
dd_Smed_v6_10100_0_1	80	36	37	47	74	90	81.2506	33.4117	45.4449	48.977	69.1645	76.7815	59.1717	0.285988	0.464512	0.615675	0.538109	0.999994	1.21925	NO	NO	NO	NO
dd_Smed_v6_10100_0_2	164	212	160	186	169	147	166.564	196.758	196.519	193.824	157.957	125.41	172.838	-0.233065	0.237936	-0.979527	0.327319	0.999994	-1.17533	NO	NO	NO	NO
dd_Smed_v6_10101_0_1	156	214	118	251	179	126	158.439	198.614	144.933	261.558	167.303	107.494	173.057	0.0921323	0.377399	0.244124	0.807135	0.999994	1.06594	NO	NO	NO	NO
dd_Smed_v6_101014_0_1	0	0	0	0	0	0	0	0	0	0	0	0	0	#N/A	N/A	N/A	N/A	N/A	#N/A	#N/A	#N/A	#N/A	#N/A
dd_Smed_v6_10102_0_1	122	146	94	115	167	164	123.907	135.503	115.455	119.837	156.088	139.913	131.784	0.148598	0.211569	0.702362	0.482454	0.999994	1.10849	NO	NO	NO	NO
dd_Smed_v6_101021_0_1	0	0	0	0	0	0	0	0	0	0	0	0	0	#N/A	N/A	N/A	N/A	N/A	#N/A	#N/A	#N/A	#N/A	#N/A
dd_Smed_v6_10103_0_1	346	344	316	339	357	384	351.409	319.267	388.124	353.26	333.672	327.601	345.556	-0.0594039	0.135431	-0.438629	0.660931	0.999994	-1.04204	NO	NO	NO	NO
dd_Smed_v6_10104_0_1	36	27	11	20	11	10	36.5628	25.0587	13.5107	20.8413	10.2812	8.53128	19.131	-0.937027	0.685647	-1.36663	0.171741	0.999994	-1.91458	-1.91458	NO	NO	NO
dd_Smed_v6_101043_0_1	0	1	2	1	1	1	0	0.928102	2.45648	1.04206	0.934656	0.853128	1.03574	-0.221959	2.00339	-0.110792	0.911782	N/A	-1.16632	NO	NO	NO	NO
dd_Smed_v6_10105_0_1	425	493	384	394	430	492	431.644	457.554	471.645	410.573	401.902	419.739	432.176	-0.141979	0.104535	-1.3582	0.174401	0.999994	-1.10342	NO	NO	NO	NO
dd_Smed_v6_10106_0_1	206	211	173	212	219	202	209.22	195.829	212.486	220.918	204.69	172.332	202.579	-0.0478628	0.175315	-0.273011	0.784845	0.999994	-1.03373	NO	NO	NO	NO
dd_Smed_v6_10107_0_1	459	547	398	499	589	575	466.175	507.672	488.84	519.99	550.512	490.549	503.956	0.0929782	0.106819	0.870425	0.384068	0.999994	1.06657	NO	NO	NO	NO
dd_Smed_v6_101075_0_1	0	0	0	0	0	0	0	0	0	0	0	0	0	#N/A	N/A	N/A	N/A	N/A	#N/A	#N/A	#N/A	#N/A	#N/A
dd_Smed_v6_101079_0_1	0	0	0	0	0	0	0	0	0	0	0	0	0	#N/A	N/A	N/A	N/A	N/A	#N/A	#N/A	#N/A	#N/A	#N/A
dd_Smed_v6_10108_0_1	321	381	291	297	395	385	326.018	353.607	357.418	309.493	369.189	328.454	340.697	-0.0410022	0.135526	-0.30254	0.76224	0.999994	-1.02883	NO	NO	NO	NO
dd_Smed_v6_101083_0_1	0	0	0	1	0	0	0	0	0	1.04206	0	0	0.173677	3.13559	4.76834	0.657585	0.510805	N/A	8.78834	NO	NO	8.78834	NO
dd_Smed_v6_10109_0_1	91	69	61	74	83	89	92.4225	64.039	74.9228	77.1128	77.5765	75.9284	77.0003	-0.0038161	0.268423	-0.0142167	0.988657	0.999994	-1.00265	NO	NO	NO	NO
dd_Smed_v6_101099_0_1	0	0	0	1	2	0	0	0	0	1.04206	1.86931	0	0.485229	4.64667	4.63554	1.0024	0.316151	N/A	25.0488	NO	NO	25.0488	NO
dd_Smed_v6_1011_0_1	257	310	245	312	333	314	261.017	287.712	300.919	325.124	311.24	267.882	292.316	0.089294	0.152609	0.585115	0.55847	0.999994	1.06385	NO	NO	NO	NO
dd_Smed_v6_10110_0_1	38	41	32	39	50	39	38.594	38.0522	39.3037	40.6405	46.7328	33.272	39.4325	0.0557211	0.343553	0.162191	0.871156	0.999994	1.03938	NO	NO	NO	NO
dd_Smed_v6_10110_0_2	309	273	220	258	304	354	313.83	253.372	270.213	268.853	284.135	302.007	282.068	0.0312312	0.154564	0.20206	0.83987	0.999994	1.02188	NO	NO	NO	NO
dd_Smed_v6_10110_0_3	9	22	10	13	17	11	9.14069	20.4182	12.2824	13.5468	15.8892	9.38441	13.4436	-0.118984	0.651094	-0.182745	0.854998	0.999994	-1.08597	NO	NO	NO	NO
dd_Smed_v6_101106_0_1	2	0	0	0	0	0	2.03126	0	0	0	0	0	0.338544	-4.29832	4.67852	-0.918736	0.358234	N/A	-19.6754	-19.6754	NO	NO	NO
dd_Smed_v6_10111_0_1	72	98	58	73	81	104	73.1255	90.954	71.238	76.0707	75.7071	88.7253	79.3034	0.0290706	0.257459	0.112914	0.910099	0.999994	1.02035	NO	NO	NO	NO
dd_Smed_v6_10112_0_1	294	335	203	381	474	375	298.596	310.914	249.333	397.027	443.027	319.923	336.47	0.43065	0.191252	2.25174	0.0243387	0.612634	1.34784	NO	NO	NO	NO
dd_Smed_v6_10112_0_2	345	314	262	283	347	355	350.393	291.424	321.799	294.904	324.326	302.86	314.284	-0.062286	0.140044	-0.444761	0.656493	0.999994	-1.04412	NO	NO	NO	NO
dd_Smed_v6_101120_0_1	0	0	0	0	1	0	0	0	0	0	0.934656	0	0.155776	3.01414	4.78601	0.62978	0.528838	N/A	8.07877	NO	NO	8.07877	NO
dd_Smed_v6_101129_0_1	0	0	0	0	0	0	0	0	0	0	0	0	0	#N/A	N/A	N/A	N/A	N/A	#N/A	#N/A	#N/A	#N/A	#N/A
dd_Smed_v6_10113_0_1	287	289	197	238	296	314	291.486	268.221	241.964	248.011	276.658	267.882	265.704	-0.0178425	0.148329	-0.12029	0.904253	0.999994	-1.01244	NO	NO	NO	NO
dd_Smed_v6_101139_0_1	0	0	0	0	0	0	0	0	0	0	0	0	0	#N/A	N/A	N/A	N/A	N/A	#N/A	#N/A	#N/A	#N/A	#N/A
dd_Smed_v6_10115_0_1	785	877	665	838	984	900	797.271	813.945	816.781	873.25	919.702	767.815	831.461	0.0761163	0.103226	0.737373	0.460895	0.999994	1.05418	NO	NO	NO	NO
dd_Smed_v6_10116_0_1	459	391	181	355	430	358	466.175	362.888	222.312	369.933	401.902	305.42	354.772	0.0330784	0.300696	0.110006	0.912405	0.999994	1.02319	NO	NO	NO	NO
dd_Smed_v6_10116_0_2	162	337	290	281	281	258	164.532	312.77	356.19	292.82	262.638	220.107	268.176	-0.103471	0.327868	-0.315586	0.752316	0.999994	-1.07435	NO	NO	NO	NO
dd_Smed_v6_10117_0_1	414	427	322	387	429	413	420.472	396.299	395.494	403.279	400.967	352.342	394.809	-0.0695593	0.120968	-0.57502	0.565278	0.999994	-1.0494	NO	NO	NO	NO
dd_Smed_v6_101179_0_1	0	0	0	0	0	0	0	0	0	0	0	0	0	#N/A	N/A	N/A	N/A	N/A	#N/A	#N/A	#N/A	#N/A	#N/A
dd_Smed_v6_101183_0_1	0	0	0	0	0	0	0	0	0	0	0	0	0	#N/A	N/A	N/A	N/A	N/A	#N/A	#N/A	#N/A	#N/A	#N/A
dd_Smed_v6_101185_0_1	0	0	0	0	0	0	0	0	0	0	0	0	0	#N/A	N/A	N/A	N/A	N/A	#N/A	#N/A	#N/A	#N/A	#N/A
dd_Smed_v6_10119_0_1	463	480	309	414	507	455	470.238	445.489	379.527	431.415	473.871	388.173	431.452	-0.00445653	0.150955	-0.0295223	0.976448	0.999994	-1.00309	NO	NO	NO	NO
dd_Smed_v6_1012_0_1	3197	3531	2476	2715	2928	3544	3246.98	3277.13	3041.13	2829.21	2736.67	3023.49	3025.77	-0.15552	0.0657105	-2.36675	0.017945	0.514076	-1.11382	NO	NO	NO	NO
dd_Smed_v6_10120_0_1	411	405	364	404	407	499	417.425	375.881	447.08	420.994	380.405	425.711	411.249	-0.0131078	0.129678	-0.10108	0.919487	0.999994	-1.00913	NO	NO	NO	NO
dd_Smed_v6_101200_0_1	0	0	0	0	0	0	0	0	0	0	0	0	0	#N/A	N/A	N/A	N/A	N/A	#N/A	#N/A	#N/A	#N/A	#N/A
dd_Smed_v6_10121_0_1	386	415	354	374	475	496	392.034	385.162	434.798	389.732	443.962	423.151	411.473	0.0554664	0.122626	0.45232	0.651039	0.999994	1.03919	NO	NO	NO	NO
dd_Smed_v6_10122_0_1	61	79	72	72	71	100	61.9536	73.32	88.4334	75.0287	66.3606	85.3128	75.0682	0.0248538	0.283715	0.0876012	0.930194	0.999994	1.01738	NO	NO	NO	NO
dd_Smed_v6_10123_0_1	31	0	15	5	0	6	31.4846	0	18.4236	5.21032	0	5.11877	10.0396	-2.27199	1.87034	-1.21475	0.224462	0.999994	-4.8299	-4.8299	NO	NO	NO
dd_Smed_v6_10123_0_2	61	78	49	78	59	108	61.9536	72.3919	60.1838	81.281	55.1447	92.1378	70.5155	0.231065	0.323911	0.713362	0.475622	0.999994	1.1737	NO	NO	NO	NO
dd_Smed_v6_10123_0_3	10	15	8	8	20	5	10.1563	13.9215	9.82593	8.33652	18.6931	4.26564	10.8665	-0.122414	0.816815	-0.149868	0.880869	0.999994	-1.08855	NO	NO	NO	NO
dd_Smed_v6_10123_0_4	32	38	15	0	22	26	32.5002	35.2679	18.4236	0	20.5624	22.1813	21.4892	-1.00843	1.18114	-0.85378	0.393227	0.999994	-2.01172	-2.01172	NO	NO	NO
dd_Smed_v6_101239_0_1	2	1	0	0	0	2	2.03126	0.928102	0	0	0	1.70626	0.777604	-0.778863	3.17139	-0.245591	0.805999	N/A	-1.71578	-1.71578	NO	NO	NO
dd_Smed_v6_10124_0_1	161	159	134	133	156	171	163.517	147.568	164.584	138.595	145.806	145.885	150.993	-0.141848	0.171245	-0.828334	0.407481	0.999994	-1.10332	NO	NO	NO	NO
dd_Smed_v6_101254_0_1	1	0	0	1	0	0	1.01563	0	0	1.04206	0	0	0.342949	-0.00826442	4.23567	-0.00195115	0.998443	N/A	-1.00574	NO	NO	NO	NO
dd_Smed_v6_10126_0_1	0	23	0	0	8	37	0	21.3463	0	0	7.47725	31.5657	10.0649	0.867458	2.59313	0.334521	0.737986	0.999994	1.82445	NO	NO	1.82445	NO
dd_Smed_v6_10126_0_2	28	18	16	21	17	0	28.4377	16.7058	19.6519	21.8834	15.8892	0	17.0947	-0.784018	1.24272	-0.630888	0.528114	0.999994	-1.72192	-1.72192	NO	NO	NO
dd_Smed_v6_101269_0_1	0	0	1	2	0	2	0	0	1.22824	2.08413	0	1.70626	0.836438	1.70331	3.10938	0.547797	0.583831	N/A	3.25648	NO	NO	3.25648	NO
dd_Smed_v6_10127_0_1	121	135	125	110	180	192	122.891	125.294	153.53	114.627	168.238	163.801	141.397	0.158166	0.252082	0.627439	0.530371	0.999994	1.11587	NO	NO	NO	NO
dd_Smed_v6_10128_0_1	0	0	0	0	0	0	0	0	0	0	0	0	0	#N/A	N/A	N/A	N/A	N/A	#N/A	#N/A	#N/A	#N/A	#N/A
dd_Smed_v6_10128_0_2	0	0	0	0	0	0	0	0	0	0	0	0	0	#N/A	N/A	N/A	N/A	N/A	#N/A	#N/A	#N/A	#N/A	#N/A
dd_Smed_v6_10128_0_3	0	2	0	0	0	0	0	1.8562	0	0	0	0	0.309367	-4.18616	4.68779	-0.892993	0.371861	N/A	-18.2037	-18.2037	NO	NO	NO
dd_Smed_v6_10128_0_4	0	31	12	50	40	0	0	28.7712	14.7389	52.1032	37.3862	0	22.1666	1.03834	1.91254	0.542911	0.587191	0.999994	2.05386	NO	NO	2.05386	NO
dd_Smed_v6_10128_0_5	0	3	0	0	5	0	0	2.78431	0	0	4.67328	0	1.24293	0.730091	3.8826	0.188042	0.850844	N/A	1.65874	NO	NO	1.65874	NO
dd_Smed_v6_10128_0_6	39	61	13	34	5	25	39.6097	56.6142	15.9671	35.4302	4.67328	21.3282	28.9371	-0.876213	0.859163	-1.01985	0.307802	0.999994	-1.83555	-1.83555	NO	NO	NO
dd_Smed_v6_10128_0_7	21	0	0	0	0	33	21.3283	0	0	0	0	28.1532	8.24692	0.401169	3.49674	0.114727	0.908662	0.999994	1.32058	NO	NO	NO	NO
dd_Smed_v6_10128_0_8	172	175	143	185	187	166	174.689	162.418	175.639	192.782	174.781	141.619	170.321	-0.0118869	0.19916	-0.0596849	0.952407	0.999994	-1.00827	NO	NO	NO	NO
dd_Smed_v6_101280_0_1	1	0	0	0	0	0	1.01563	0	0	0	0	0	0.169272	-3.30343	4.791	-0.689508	0.490504	N/A	-9.8726	-9.8726	NO	NO	NO
dd_Smed_v6_10129_0_1	347	301	272	292	381	351	352.424	279.359	334.082	304.283	356.104	299.448	320.95	-0.00755762	0.165275	-0.0457275	0.963527	0.999994	-1.00525	NO	NO	NO	NO
dd_Smed_v6_101291_0_1	0	0	0	0	0	0	0	0	0	0	0	0	0	#N/A	N/A	N/A	N/A	N/A	#N/A	#N/A	#N/A	#N/A	#N/A
dd_Smed_v6_1013_0_1	1607	1594	1494	1239	1419	1571	1632.12	1479.39	1834.99	1291.12	1326.28	1340.26	1484.03	-0.320288	0.101471	-3.15645	0.00159704	0.125152	-1.24858	NO	NO	NO	NO
dd_Smed_v6_10130_0_1	567	632	485	535	570	597	575.863	586.56	595.697	557.505	532.754	509.317	559.616	-0.137139	0.0935887	-1.46534	0.142829	0.999994	-1.09972	NO	NO	NO	NO
dd_Smed_v6_101304_0_1	0	0	0	0	0	0	0	0	0	0	0	0	0	#N/A	N/A	N/A	N/A	N/A	#N/A	#N/A	#N/A	#N/A	#N/A
dd_Smed_v6_101308_0_1	0	1	0	0	0	0	0	0.928102	0	0	0	0	0.154684	-3.20437	4.80681	-0.666631	0.505008	N/A	-9.21747	-9.21747	NO	NO	NO
dd_Smed_v6_10131_0_1	269	306	221	261	280	250	273.205	283.999	271.441	271.979	261.704	213.282	262.602	-0.152531	0.161026	-0.947247	0.343513	0.999994	-1.11152	NO	NO	NO	NO
dd_Smed_v6_101314_0_1	0	0	0	0	0	0	0	0	0	0	0	0	0	#N/A	N/A	N/A	N/A	N/A	#N/A	#N/A	#N/A	#N/A	#N/A
dd_Smed_v6_101317_0_1	1	2	0	0	1	0	1.01563	1.8562	0	0	0.934656	0	0.634415	-1.63704	3.29389	-0.496993	0.619194	N/A	-3.11027	-3.11027	NO	NO	NO
dd_Smed_v6_10132_0_1	251	254	191	247	239	272	254.924	235.738	234.594	257.39	223.383	232.051	239.68	-0.0268541	0.146107	-0.183798	0.854172	0.999994	-1.01879	NO	NO	NO	NO
dd_Smed_v6_10133_0_1	320	340	265	277	379	417	325.002	315.555	325.484	288.652	354.235	355.754	327.447	0.0501781	0.145055	0.345923	0.7294	0.999994	1.03539	NO	NO	NO	NO
dd_Smed_v6_10134_0_1	147	150	134	121	0	119	149.298	139.215	164.584	126.09	0	101.522	113.452	-0.99341	1.2424	-0.799588	0.423949	0.999994	-1.99089	-1.99089	NO	NO	NO
dd_Smed_v6_10134_0_2	97	112	87	154	275	158	98.5163	103.947	106.857	160.478	257.03	134.794	143.604	0.836472	0.317929	2.631	0.00851346	0.335812	1.78568	NO	NO	1.78568	NO
dd_Smed_v6_10135_0_1	664	658	545	708	685	840	674.38	610.691	669.392	737.782	640.239	716.627	674.852	0.100611	0.107269	0.937932	0.348279	0.999994	1.07223	NO	NO	NO	NO
dd_Smed_v6_101351_0_1	0	0	1	0	1	0	0	0	1.22824	0	0.934656	0	0.360483	-0.342303	4.22103	-0.0810948	0.935367	N/A	-1.26778	NO	NO	NO	NO
dd_Smed_v6_10136_0_1	190	182	151	154	207	191	192.97	168.915	185.465	160.478	193.474	162.947	177.375	-0.081106	0.1793	-0.452349	0.651018	0.999994	-1.05783	NO	NO	NO	NO
dd_Smed_v6_101366_0_1	1	0	0	1	0	0	1.01563	0	0	1.04206	0	0	0.342949	-0.00826442	4.23567	-0.00195115	0.998443	N/A	-1.00574	NO	NO	NO	NO
dd_Smed_v6_10138_0_10	8	22	10	23	14	17	8.12506	20.4182	12.2824	23.9675	13.0852	14.5032	15.3969	0.324465	0.658847	0.492475	0.622384	0.999994	1.2522	NO	NO	NO	NO
dd_Smed_v6_10138_0_11	10	8	7	12	12	8	10.1563	7.42481	8.59769	12.5048	11.2159	6.82502	9.45408	0.216751	0.688008	0.315041	0.752731	0.999994	1.16211	NO	NO	NO	NO
dd_Smed_v6_10138_0_13	6	3	1	5	3	2	6.09379	2.78431	1.22824	5.21032	2.80397	1.70626	3.30448	-0.085169	1.23024	-0.0692294	0.944807	N/A	-1.06081	NO	NO	NO	NO
dd_Smed_v6_10138_0_17	0	0	0	0	1	1	0	0	0	0	0.934656	0.853128	0.297964	3.95702	4.67997	0.845521	0.39782	N/A	15.5303	NO	NO	15.5303	NO
dd_Smed_v6_10138_0_18	2	9	3	0	2	0	2.03126	8.35292	3.68473	0	1.86931	0	2.65637	-2.91385	1.89374	-1.53868	0.123883	N/A	-7.53628	-7.53628	NO	NO	NO
dd_Smed_v6_10138_0_19	21	29	11	17	14	13	21.3283	26.915	13.5107	17.7151	13.0852	11.0907	17.2741	-0.576463	0.570664	-1.01016	0.312418	0.999994	-1.49119	-1.49119	NO	NO	NO
dd_Smed_v6_10138_0_20	6	5	5	5	3	5	6.09379	4.64051	6.14121	5.21032	2.80397	4.26564	4.85924	-0.45813	0.906352	-0.505466	0.613232	N/A	-1.37376	NO	NO	NO	NO
dd_Smed_v6_10138_0_3	35	55	20	42	54	46	35.5471	51.0456	24.5648	43.7667	50.4714	39.2439	40.7733	0.253272	0.423086	0.598629	0.54942	0.999994	1.19191	NO	NO	NO	NO
dd_Smed_v6_10138_0_4	0	0	0	0	0	0	0	0	0	0	0	0	0	#N/A	N/A	N/A	N/A	N/A	#N/A	#N/A	#N/A	#N/A	#N/A
dd_Smed_v6_10138_0_7	9	10	9	8	4	9	9.14069	9.28102	11.0542	8.33652	3.73862	7.67815	8.20486	-0.575871	0.74447	-0.773531	0.439208	0.999994	-1.49058	-1.49058	NO	NO	NO
dd_Smed_v6_10138_0_8	0	0	0	0	0	0	0	0	0	0	0	0	0	#N/A	N/A	N/A	N/A	N/A	#N/A	#N/A	#N/A	#N/A	#N/A
dd_Smed_v6_10139_0_1	84	90	53	95	76	57	85.3131	83.5292	65.0968	98.9961	71.0339	48.6283	75.4329	-0.104344	0.371755	-0.280679	0.778956	0.999994	-1.07501	NO	NO	NO	NO
dd_Smed_v6_1014_0_1	310	327	279	193	205	225	314.846	303.489	342.679	201.118	191.604	191.954	257.615	-0.715471	0.137729	-5.19478	2.04964e-07	0.000110743	-1.64202	-1.64202	YES	NO	NO
dd_Smed_v6_10140_0_1	483	434	330	386	479	432	490.55	402.796	405.32	402.237	447.7	368.551	419.526	-0.0928671	0.1532	-0.606183	0.544393	0.999994	-1.06649	NO	NO	NO	NO
dd_Smed_v6_10140_0_2	34	172	98	134	110	139	34.5315	159.633	120.368	139.637	102.812	118.585	112.594	0.198296	0.558163	0.355265	0.722391	0.999994	1.14734	NO	NO	NO	NO
dd_Smed_v6_101404_0_1	0	1	0	0	0	1	0	0.928102	0	0	0	0.853128	0.296872	-0.131306	4.29099	-0.0306005	0.975588	N/A	-1.09528	NO	NO	NO	NO
dd_Smed_v6_10141_0_1	251	184	204	157	220	230	254.924	170.771	250.561	163.604	205.624	196.219	206.951	-0.254752	0.238871	-1.06648	0.286206	0.999994	-1.19313	NO	NO	NO	NO
dd_Smed_v6_10141_0_2	25	0	0	57	39	47	25.3908	0	0	59.3977	36.4516	40.097	26.8895	2.41699	1.65469	1.46069	0.144101	0.999994	5.34057	NO	NO	5.34057	NO
dd_Smed_v6_10141_0_3	0	48	0	41	34	41	0	44.5489	0	42.7247	31.7783	34.9782	25.6717	1.29179	1.79844	0.718288	0.47258	0.999994	2.44832	NO	NO	2.44832	NO
dd_Smed_v6_10141_0_4	0	29	25	0	0	0	0	26.915	30.706	0	0	0	9.6035	-9.11634	3.29296	-2.76843	0.00563263	0.267067	-554.998	-554.998	NO	NO	NO
dd_Smed_v6_101414_0_1	0	0	0	0	0	0	0	0	0	0	0	0	0	#N/A	N/A	N/A	N/A	N/A	#N/A	#N/A	#N/A	#N/A	#N/A
dd_Smed_v6_101417_0_1	0	0	0	0	0	0	0	0	0	0	0	0	0	#N/A	N/A	N/A	N/A	N/A	#N/A	#N/A	#N/A	#N/A	#N/A
dd_Smed_v6_10142_0_1	219	209	155	136	289	249	222.423	193.973	190.377	141.721	270.116	212.429	205.173	0.0420561	0.286101	0.146997	0.883134	0.999994	1.02958	NO	NO	NO	NO
dd_Smed_v6_10142_0_2	112	152	119	226	140	186	113.751	141.071	146.161	235.507	130.852	158.682	154.337	0.387771	0.301558	1.28589	0.198481	0.999994	1.30837	NO	NO	NO	NO
dd_Smed_v6_101424_0_1	0	0	1	1	1	2	0	0	1.22824	1.04206	0.934656	1.70626	0.818536	1.70889	2.49381	0.685253	0.493184	N/A	3.2691	NO	NO	3.2691	NO
dd_Smed_v6_10143_0_1	352	375	257	332	421	507	357.502	348.038	315.658	345.965	393.49	432.536	365.532	0.198877	0.146483	1.35769	0.174564	0.999994	1.1478	NO	NO	NO	NO
dd_Smed_v6_101436_0_1	0	0	0	0	0	0	0	0	0	0	0	0	0	#N/A	N/A	N/A	N/A	N/A	#N/A	#N/A	#N/A	#N/A	#N/A
dd_Smed_v6_101438_0_1	0	1	0	2	0	0	0	0.928102	0	2.08413	0	0	0.502039	1.10543	4.13778	0.267154	0.78935	N/A	2.15162	NO	NO	2.15162	NO
dd_Smed_v6_10144_0_1	0	4	22	0	136	0	0	3.71241	27.0213	0	127.113	0	26.3078	2.05012	3.73663	0.548655	N/A	N/A	4.14141	NO	NO	4.14141	NO
dd_Smed_v6_10144_0_2	0	5	20	0	0	47	0	4.64051	24.5648	0	0	40.097	11.5504	0.462652	2.68586	0.172254	0.863238	0.999994	1.37807	NO	NO	NO	NO
dd_Smed_v6_10144_0_3	145	175	87	164	25	145	147.267	162.418	106.857	170.899	23.3664	123.704	122.418	-0.391012	0.663667	-0.589169	0.555748	0.999994	-1.31131	NO	NO	NO	NO
dd_Smed_v6_10144_0_4	201	223	155	146	330	230	204.142	206.967	190.377	152.141	308.436	196.219	209.714	0.127229	0.306206	0.415499	0.677776	0.999994	1.09219	NO	NO	NO	NO
dd_Smed_v6_10144_0_5	0	0	0	0	0	0	0	0	0	0	0	0	0	#N/A	N/A	N/A	N/A	N/A	#N/A	#N/A	#N/A	#N/A	#N/A
dd_Smed_v6_10144_0_6	86	53	0	143	0	70	87.3444	49.1894	0	149.015	0	59.719	57.5447	0.611784	2.65227	0.230664	0.817576	0.999994	1.52815	NO	NO	1.52815	NO
dd_Smed_v6_10144_0_7	8	6	0	0	0	5	8.12506	5.56861	0	0	0	4.26564	2.99322	-1.67001	2.58592	-0.645809	0.518403	N/A	-3.18217	-3.18217	NO	NO	NO
dd_Smed_v6_10144_0_8	0	52	63	0	54	1	0	48.2613	77.3792	0	50.4714	0.853128	29.4942	-1.29075	2.17004	-0.594806	0.551973	0.999994	-2.44655	-2.44655	NO	NO	NO
dd_Smed_v6_10144_0_9	38	31	42	78	50	59	38.594	28.7712	51.5862	81.281	46.7328	50.3345	49.55	0.588719	0.431065	1.36573	0.172023	0.999994	1.50391	NO	NO	1.50391	NO
dd_Smed_v6_101440_0_1	0	0	3	0	0	0	0	0	3.68473	0	0	0	0.614121	-5.13146	4.62785	-1.10882	0.267507	N/A	-35.0529	-35.0529	NO	NO	NO
dd_Smed_v6_101443_0_1	0	0	0	0	0	0	0	0	0	0	0	0	0	#N/A	N/A	N/A	N/A	N/A	#N/A	#N/A	#N/A	#N/A	#N/A
dd_Smed_v6_10145_0_1	17	5	13	40	15	33	17.2657	4.64051	15.9671	41.6826	14.0198	28.1532	20.2882	1.15416	0.762506	1.51364	0.130116	0.999994	2.22555	NO	NO	2.22555	NO
dd_Smed_v6_10145_0_2	148	195	135	154	164	196	150.314	180.98	165.813	160.478	153.284	167.213	163.013	-0.0481835	0.176021	-0.273737	0.784286	0.999994	-1.03396	NO	NO	NO	NO
dd_Smed_v6_10146_0_1	9	6	5	4	7	8	9.14069	5.56861	6.14121	4.16826	6.54259	6.82502	6.39773	-0.243099	0.812394	-0.299237	0.764759	0.999994	-1.18353	NO	NO	NO	NO
dd_Smed_v6_10146_0_2	72	71	65	74	64	96	73.1255	65.8952	79.8357	77.1128	59.818	81.9003	72.9479	0.00371645	0.275615	0.0134842	0.989241	0.999994	1.00258	NO	NO	NO	NO
dd_Smed_v6_10147_0_1	0	0	14	0	0	11	0	0	17.1954	0	0	9.38441	4.42997	-0.864826	3.64608	-0.237193	0.812507	N/A	-1.82112	-1.82112	NO	NO	NO
dd_Smed_v6_10147_0_2	53	278	110	182	93	65	53.8285	258.012	135.107	189.656	86.923	55.4533	129.83	-0.431142	0.677259	-0.636598	0.524387	0.999994	-1.3483	NO	NO	NO	NO
dd_Smed_v6_10147_0_3	27	12	0	0	24	0	27.4221	11.1372	0	0	22.4317	0	10.1652	-0.782745	2.58317	-0.303018	0.761876	0.999994	-1.7204	-1.7204	NO	NO	NO
dd_Smed_v6_10147_0_4	318	157	116	178	353	441	322.971	145.712	142.476	185.488	329.934	376.229	250.468	0.54501	0.435529	1.25137	0.210798	0.999994	1.45903	NO	NO	1.45903	NO
dd_Smed_v6_10147_0_5	105	3	17	0	81	203	106.641	2.78431	20.8801	0	75.7071	173.185	63.1996	0.934048	1.64745	0.566967	0.570737	0.999994	1.91063	NO	NO	1.91063	NO
dd_Smed_v6_10147_0_6	126	384	243	307	166	105	127.97	356.391	298.463	319.914	155.153	89.5784	224.578	-0.472684	0.560145	-0.843861	0.398747	0.999994	-1.38769	NO	NO	NO	NO
dd_Smed_v6_10147_0_7	0	85	0	59	16	57	0	78.8886	0	61.4818	14.9545	48.6283	33.9922	0.662001	1.92892	0.343198	0.73145	0.999994	1.58228	NO	NO	1.58228	NO
dd_Smed_v6_10147_0_8	150	37	150	70	199	203	152.345	34.3398	184.236	72.9445	185.997	173.185	133.841	0.223164	0.658779	0.338754	0.734795	0.999994	1.16729	NO	NO	NO	NO
dd_Smed_v6_101474_0_1	0	0	0	0	0	0	0	0	0	0	0	0	0	#N/A	N/A	N/A	N/A	N/A	#N/A	#N/A	#N/A	#N/A	#N/A
dd_Smed_v6_10148_0_1	510	488	373	524	595	600	517.972	452.914	458.134	546.042	556.12	511.877	507.177	0.174717	0.112603	1.55163	0.120752	0.999994	1.12874	NO	NO	NO	NO
dd_Smed_v6_101482_0_1	0	1	0	0	0	0	0	0.928102	0	0	0	0	0.154684	-3.20437	4.80681	-0.666631	0.505008	N/A	-9.21747	-9.21747	NO	NO	NO
dd_Smed_v6_101489_0_1	1	0	0	1	0	0	1.01563	0	0	1.04206	0	0	0.342949	-0.00826442	4.23567	-0.00195115	0.998443	N/A	-1.00574	NO	NO	NO	NO
dd_Smed_v6_10149_0_1	209	307	184	243	287	305	212.267	284.927	225.996	253.222	268.246	260.204	250.81	0.109895	0.177677	0.618511	0.536239	0.999994	1.07915	NO	NO	NO	NO
dd_Smed_v6_101496_0_1	0	0	0	0	0	0	0	0	0	0	0	0	0	#N/A	N/A	N/A	N/A	N/A	#N/A	#N/A	#N/A	#N/A	#N/A
dd_Smed_v6_101497_0_1	0	0	1	0	0	0	0	0	1.22824	0	0	0	0.204707	-3.51601	4.76036	-0.738603	0.460148	N/A	-11.44	-11.44	NO	NO	NO
dd_Smed_v6_1015_0_1	1186	1429	1048	1051	1672	1858	1204.54	1326.26	1287.2	1095.21	1562.74	1585.11	1343.51	0.152868	0.16371	0.933778	0.350418	0.999994	1.11178	NO	NO	NO	NO
dd_Smed_v6_10150_0_1	81	120	90	116	122	86	82.2662	111.372	110.542	120.88	114.028	73.369	102.076	0.0171306	0.313187	0.0546976	0.956379	0.999994	1.01194	NO	NO	NO	NO
dd_Smed_v6_10150_0_2	5	12	5	10	11	16	5.07816	11.1372	6.14121	10.4206	10.2812	13.65	9.45142	0.609899	0.719958	0.847132	0.396922	0.999994	1.52615	NO	NO	1.52615	NO
dd_Smed_v6_101502_0_1	0	4	0	0	0	0	0	3.71241	0	0	0	0	0.618734	-5.17467	4.62593	-1.11862	0.263301	N/A	-36.1187	-36.1187	NO	NO	NO
dd_Smed_v6_10151_0_1	381	409	317	386	401	418	386.956	379.594	389.353	402.237	374.797	356.607	381.591	-0.029171	0.11407	-0.25573	0.798159	0.999994	-1.02043	NO	NO	NO	NO
dd_Smed_v6_10152_0_1	424	500	395	398	496	489	430.628	464.051	485.156	414.742	463.589	417.18	445.891	-0.0897195	0.117248	-0.765214	0.444144	0.999994	-1.06416	NO	NO	NO	NO
dd_Smed_v6_101528_0_1	3	1	1	2	0	0	3.0469	0.928102	1.22824	2.08413	0	0	1.21456	-1.37189	2.30532	-0.595099	0.551777	N/A	-2.5881	-2.5881	NO	NO	NO
dd_Smed_v6_10153_0_1	50	67	28	52	43	43	50.7816	62.1828	34.3908	54.1874	40.1902	36.6845	46.4029	-0.180031	0.399906	-0.450185	0.652577	0.999994	-1.13291	NO	NO	NO	NO
dd_Smed_v6_101533_0_1	0	0	0	0	0	0	0	0	0	0	0	0	0	#N/A	N/A	N/A	N/A	N/A	#N/A	#N/A	#N/A	#N/A	#N/A
dd_Smed_v6_101534_0_1	0	0	0	0	0	0	0	0	0	0	0	0	0	#N/A	N/A	N/A	N/A	N/A	#N/A	#N/A	#N/A	#N/A	#N/A
dd_Smed_v6_10155_0_1	264	284	224	262	317	384	268.127	263.581	275.126	273.021	296.286	327.601	283.957	0.155459	0.140889	1.10342	0.269846	0.999994	1.11378	NO	NO	NO	NO
dd_Smed_v6_101551_0_1	0	0	0	1	0	0	0	0	0	1.04206	0	0	0.173677	3.13559	4.76834	0.657585	0.510805	N/A	8.78834	NO	NO	8.78834	NO
dd_Smed_v6_101554_0_1	0	0	0	0	1	0	0	0	0	0	0.934656	0	0.155776	3.01414	4.78601	0.62978	0.528838	N/A	8.07877	NO	NO	8.07877	NO
dd_Smed_v6_101555_0_1	0	1	0	0	0	0	0	0.928102	0	0	0	0	0.154684	-3.20437	4.80681	-0.666631	0.505008	N/A	-9.21747	-9.21747	NO	NO	NO
dd_Smed_v6_101559_0_1	0	0	0	0	0	0	0	0	0	0	0	0	0	#N/A	N/A	N/A	N/A	N/A	#N/A	#N/A	#N/A	#N/A	#N/A
dd_Smed_v6_10156_0_1	574	600	384	568	655	530	582.973	556.861	471.645	591.893	612.2	452.158	544.621	0.0374493	0.173921	0.215324	0.829515	0.999994	1.0263	NO	NO	NO	NO
dd_Smed_v6_10156_0_2	106	95	137	234	173	149	107.657	88.1697	168.269	243.843	161.695	127.116	149.458	0.55113	0.384401	1.43374	0.151648	0.999994	1.46523	NO	NO	1.46523	NO
dd_Smed_v6_10157_0_1	80	95	75	86	86	93	81.2506	88.1697	92.1181	89.6176	80.3804	79.3409	85.1462	-0.0692524	0.22742	-0.304513	0.760737	0.999994	-1.04917	NO	NO	NO	NO
dd_Smed_v6_10158_0_1	72	77	60	79	88	102	73.1255	71.4638	73.6945	82.3231	82.2497	87.019	78.3126	0.206406	0.228487	0.903358	0.366336	0.999994	1.15381	NO	NO	NO	NO
dd_Smed_v6_10159_0_1	268	313	231	292	319	387	272.189	290.496	283.724	304.283	298.155	330.16	296.501	0.140688	0.127472	1.10368	0.269733	0.999994	1.10243	NO	NO	NO	NO
dd_Smed_v6_101597_0_1	0	1	0	0	1	0	0	0.928102	0	0	0.934656	0	0.31046	-0.0306605	4.27335	-0.00717482	0.994275	N/A	-1.02148	NO	NO	NO	NO
dd_Smed_v6_1016_0_1	196	100	192	154	197	217	199.064	92.8102	235.822	160.478	184.127	185.129	176.238	0.00893675	0.378222	0.0236283	0.981149	0.999994	1.00621	NO	NO	NO	NO
dd_Smed_v6_1016_0_2	573	707	496	558	616	790	581.957	656.168	609.208	581.472	575.748	673.971	613.087	-0.0122143	0.118735	-0.10287	0.918066	0.999994	-1.0085	NO	NO	NO	NO
dd_Smed_v6_10160_0_1	193	192	155	198	229	224	196.017	178.196	190.377	206.329	214.036	191.101	196.009	0.115195	0.155188	0.742291	0.457911	0.999994	1.08312	NO	NO	NO	NO
dd_Smed_v6_10161_0_1	201	226	152	202	201	224	204.142	209.751	186.693	210.497	187.866	191.101	198.342	-0.0307654	0.156752	-0.196268	0.844401	0.999994	-1.02155	NO	NO	NO	NO
dd_Smed_v6_10162_0_1	138	166	139	131	167	197	140.157	154.065	170.726	136.51	156.088	168.066	154.269	-0.00869945	0.195243	-0.044557	0.96446	0.999994	-1.00605	NO	NO	NO	NO
dd_Smed_v6_10163_0_1	0	0	0	0	0	0	0	0	0	0	0	0	0	#N/A	N/A	N/A	N/A	N/A	#N/A	#N/A	#N/A	#N/A	#N/A
dd_Smed_v6_10163_0_2	36	101	48	104	49	53	36.5628	93.7383	58.9556	108.375	45.7981	45.2158	64.7742	0.0704359	0.566892	0.124249	0.901118	0.999994	1.05003	NO	NO	NO	NO
dd_Smed_v6_10163_0_3	102	29	43	52	80	52	103.594	26.915	52.8144	54.1874	74.7725	44.3626	59.4411	-0.0806848	0.581374	-0.138783	0.889622	0.999994	-1.05752	NO	NO	NO	NO
dd_Smed_v6_10164_0_1	375	350	271	335	443	427	380.862	324.836	332.854	349.092	414.053	364.286	360.997	0.118677	0.144219	0.822897	0.410566	0.999994	1.08574	NO	NO	NO	NO
dd_Smed_v6_101642_0_1	0	1	0	1	0	0	0	0.928102	0	1.04206	0	0	0.328361	0.0907951	4.25355	0.0213457	0.98297	N/A	1.06496	NO	NO	NO	NO
dd_Smed_v6_101644_0_1	0	1	0	0	0	0	0	0.928102	0	0	0	0	0.154684	-3.20437	4.80681	-0.666631	0.505008	N/A	-9.21747	-9.21747	NO	NO	NO
dd_Smed_v6_101649_0_1	0	0	1	0	0	1	0	0	1.22824	0	0	0.853128	0.346895	-0.442949	4.23888	-0.104497	0.916775	N/A	-1.35938	NO	NO	NO	NO
dd_Smed_v6_10165_0_1	425	456	366	372	418	348	431.644	423.214	449.537	387.648	390.686	296.889	396.603	-0.279848	0.158545	-1.7651	0.0775462	0.981815	-1.21407	NO	NO	NO	NO
dd_Smed_v6_101654_0_1	0	0	0	0	0	1	0	0	0	0	0	0.853128	0.142188	2.91349	4.80177	0.606754	0.544014	N/A	7.53439	NO	NO	7.53439	NO
dd_Smed_v6_101655_0_1	1	0	0	1	0	0	1.01563	0	0	1.04206	0	0	0.342949	-0.00826442	4.23567	-0.00195115	0.998443	N/A	-1.00574	NO	NO	NO	NO
dd_Smed_v6_10166_0_10	2	0	7	0	13	13	2.03126	0	8.59769	0	12.1505	11.0907	5.64502	1.15034	1.97971	0.581067	0.561195	0.999994	2.21967	NO	NO	2.21967	NO
dd_Smed_v6_10166_0_11	15	14	23	14	12	16	15.2345	12.9934	28.2496	14.5889	11.2159	13.65	15.9887	-0.505007	0.598446	-0.843863	0.398746	0.999994	-1.41913	-1.41913	NO	NO	NO
dd_Smed_v6_10166_0_12	26	42	26	30	26	29	26.4064	38.9803	31.9343	31.2619	24.3011	24.7407	29.6041	-0.2835	0.408939	-0.693257	0.488148	0.999994	-1.21714	NO	NO	NO	NO
dd_Smed_v6_10166_0_13	17	13	7	11	22	15	17.2657	12.0653	8.59769	11.4627	20.5624	12.7969	13.7918	0.234618	0.63464	0.369686	0.711616	0.999994	1.17659	NO	NO	NO	NO
dd_Smed_v6_10166_0_15	0	0	1	3	1	0	0	0	1.22824	3.12619	0.934656	0	0.881515	1.78943	3.17202	0.564132	0.572665	N/A	3.45679	NO	NO	3.45679	NO
dd_Smed_v6_10166_0_2	0	0	0	10	0	0	0	0	0	10.4206	0	0	1.73677	6.48638	4.58272	1.4154	0.156951	N/A	89.6594	NO	NO	89.6594	NO
dd_Smed_v6_10166_0_4	0	7	0	0	0	0	0	6.49671	0	0	0	0	1.08279	-5.97645	4.59884	-1.29956	0.193753	N/A	-62.9638	-62.9638	NO	NO	NO
dd_Smed_v6_10166_0_5	51	67	47	37	50	72	51.7972	62.1828	57.7274	38.5564	46.7328	61.4252	53.0703	-0.222327	0.334956	-0.663751	0.50685	0.999994	-1.16661	NO	NO	NO	NO
dd_Smed_v6_10166_0_6	12	13	6	15	16	11	12.1876	12.0653	7.36945	15.631	14.9545	9.38441	11.932	0.321356	0.636473	0.504901	0.613629	0.999994	1.2495	NO	NO	NO	NO
dd_Smed_v6_10166_0_7	6	0	10	3	7	3	6.09379	0	12.2824	3.12619	6.54259	2.55938	5.10073	-0.572585	1.47725	-0.387602	0.698311	N/A	-1.48719	-1.48719	NO	NO	NO
dd_Smed_v6_10166_0_8	3	2	0	4	0	0	3.0469	1.8562	0	4.16826	0	0	1.51189	-0.262028	2.89925	-0.0903779	0.927987	N/A	-1.19916	NO	NO	NO	NO
dd_Smed_v6_10167_0_1	290	316	242	270	335	338	294.533	293.28	297.235	281.357	313.11	288.357	294.645	-0.00291003	0.125353	-0.0232148	0.981479	0.999994	-1.00202	NO	NO	NO	NO
dd_Smed_v6_101673_0_1	0	0	0	0	0	0	0	0	0	0	0	0	0	#N/A	N/A	N/A	N/A	N/A	#N/A	#N/A	#N/A	#N/A	#N/A
dd_Smed_v6_10168_0_1	108	113	71	80	87	84	109.688	104.875	87.2052	83.3652	81.3151	71.6627	89.6853	-0.358287	0.238009	-1.50535	0.132234	0.999994	-1.2819	NO	NO	NO	NO
dd_Smed_v6_101680_0_1	0	0	0	0	0	0	0	0	0	0	0	0	0	#N/A	N/A	N/A	N/A	N/A	#N/A	#N/A	#N/A	#N/A	#N/A
dd_Smed_v6_101683_0_1	1	0	0	0	0	0	1.01563	0	0	0	0	0	0.169272	-3.30343	4.791	-0.689508	0.490504	N/A	-9.8726	-9.8726	NO	NO	NO
dd_Smed_v6_10169_0_1	340	337	301	261	467	422	345.315	312.77	369.701	271.979	436.484	360.02	349.378	0.0580486	0.218175	0.266064	0.79019	0.999994	1.04106	NO	NO	NO	NO
dd_Smed_v6_1017_0_1	1278	1414	915	1311	1299	1530	1297.98	1312.34	1123.84	1366.15	1214.12	1305.29	1269.95	0.0557208	0.099703	0.558867	0.576252	0.999994	1.03938	NO	NO	NO	NO
dd_Smed_v6_10170_0_1	357	377	276	360	373	419	362.581	349.894	338.995	375.143	348.627	357.461	355.45	0.0385975	0.113665	0.339572	0.734179	0.999994	1.02711	NO	NO	NO	NO
dd_Smed_v6_101703_0_1	0	0	0	1	0	0	0	0	0	1.04206	0	0	0.173677	3.13559	4.76834	0.657585	0.510805	N/A	8.78834	NO	NO	8.78834	NO
dd_Smed_v6_10171_0_1	287	285	208	277	341	286	291.486	264.509	255.474	288.652	318.718	243.995	277.139	0.06732	0.169693	0.396716	0.691577	0.999994	1.04777	NO	NO	NO	NO
dd_Smed_v6_10171_0_2	39	89	46	84	76	101	39.6097	82.6011	56.4991	87.5334	71.0339	86.1659	70.5738	0.449902	0.375127	1.19933	0.230398	0.999994	1.36595	NO	NO	NO	NO
dd_Smed_v6_101722_0_1	0	0	0	0	0	0	0	0	0	0	0	0	0	#N/A	N/A	N/A	N/A	N/A	#N/A	#N/A	#N/A	#N/A	#N/A
dd_Smed_v6_101724_0_1	1	0	1	0	0	0	1.01563	0	1.22824	0	0	0	0.373979	-4.42187	4.66909	-0.947053	0.343612	N/A	-21.4346	-21.4346	NO	NO	NO
dd_Smed_v6_10173_0_1	155	166	125	126	156	187	157.423	154.065	153.53	131.3	145.806	159.535	150.277	-0.0884225	0.180031	-0.491151	0.623319	0.999994	-1.06321	NO	NO	NO	NO
dd_Smed_v6_10174_0_1	93	113	88	132	142	143	94.4538	104.875	108.085	137.553	132.721	121.997	116.614	0.351562	0.199146	1.76535	0.0775049	0.981815	1.27594	NO	NO	NO	NO
dd_Smed_v6_10175_0_1	209	223	214	204	245	306	212.267	206.967	262.844	212.581	228.991	261.057	230.784	0.0478477	0.185813	0.257504	0.796789	0.999994	1.03372	NO	NO	NO	NO
dd_Smed_v6_10175_0_2	14	19	0	3	16	4	14.2188	17.6339	0	3.12619	14.9545	3.41251	8.891	-0.574829	1.45325	-0.395547	0.692439	0.999994	-1.4895	-1.4895	NO	NO	NO
dd_Smed_v6_10176_0_1	342	418	217	386	467	366	347.346	387.947	266.528	402.237	436.484	312.245	358.798	0.197184	0.220834	0.892908	0.371907	0.999994	1.14646	NO	NO	NO	NO
dd_Smed_v6_10176_0_2	643	786	581	650	767	688	653.051	729.488	713.609	677.342	716.881	586.952	679.554	-0.0821705	0.121501	-0.676295	0.498853	0.999994	-1.05861	NO	NO	NO	NO
dd_Smed_v6_101761_0_1	0	0	0	3	0	0	0	0	0	3.12619	0	0	0.521032	4.7408	4.63094	1.02372	0.305966	N/A	26.7377	NO	NO	26.7377	NO
dd_Smed_v6_10177_0_1	119	103	70	94	117	152	120.86	95.5945	85.9769	97.9541	109.355	129.675	106.569	0.155964	0.260459	0.598806	0.549302	0.999994	1.11417	NO	NO	NO	NO
dd_Smed_v6_101770_0_1	0	0	0	0	0	0	0	0	0	0	0	0	0	#N/A	N/A	N/A	N/A	N/A	#N/A	#N/A	#N/A	#N/A	#N/A
dd_Smed_v6_101775_0_1	0	0	0	0	0	0	0	0	0	0	0	0	0	#N/A	N/A	N/A	N/A	N/A	#N/A	#N/A	#N/A	#N/A	#N/A
dd_Smed_v6_101776_0_1	0	0	0	0	0	0	0	0	0	0	0	0	0	#N/A	N/A	N/A	N/A	N/A	#N/A	#N/A	#N/A	#N/A	#N/A
dd_Smed_v6_101779_0_1	0	0	0	0	0	0	0	0	0	0	0	0	0	#N/A	N/A	N/A	N/A	N/A	#N/A	#N/A	#N/A	#N/A	#N/A
dd_Smed_v6_10178_0_1	10	18	6	12	6	5	10.1563	16.7058	7.36945	12.5048	5.60794	4.26564	9.43499	-0.637222	0.823378	-0.773913	0.438982	0.999994	-1.55533	-1.55533	NO	NO	NO
dd_Smed_v6_10179_0_1	40	57	24	86	55	53	40.6253	52.9018	29.4778	89.6176	51.4061	45.2158	51.5407	0.588387	0.456939	1.28767	0.197861	0.999994	1.50356	NO	NO	1.50356	NO
dd_Smed_v6_10179_0_2	0	4	4	2	2	0	0	3.71241	4.91297	2.08413	1.86931	0	2.09647	-1.1349	2.06023	-0.550863	0.581728	N/A	-2.19604	-2.19604	NO	NO	NO
dd_Smed_v6_1018_0_1	1587	1633	1279	1330	1465	1880	1611.81	1515.59	1570.92	1385.95	1369.27	1603.88	1509.57	-0.107207	0.0920198	-1.16505	0.244	0.999994	-1.07714	NO	NO	NO	NO
dd_Smed_v6_10180_0_1	328	389	270	281	360	394	333.127	361.032	331.625	292.82	336.476	336.132	331.869	-0.0871651	0.131801	-0.661338	0.508396	0.999994	-1.06228	NO	NO	NO	NO
dd_Smed_v6_10181_0_1	52	55	51	44	36	56	52.8129	51.0456	62.6403	45.8508	33.6476	47.7752	48.9621	-0.383411	0.32847	-1.16726	0.243104	0.999994	-1.30442	NO	NO	NO	NO
dd_Smed_v6_101818_0_1	0	0	0	0	0	0	0	0	0	0	0	0	0	#N/A	N/A	N/A	N/A	N/A	#N/A	#N/A	#N/A	#N/A	#N/A
dd_Smed_v6_10182_0_1	12	0	20	0	22	35	12.1876	0	24.5648	0	20.5624	29.8595	14.5291	0.462581	1.90792	0.242453	0.808429	0.999994	1.37801	NO	NO	NO	NO
dd_Smed_v6_10182_0_2	0	36	0	38	0	0	0	33.4117	0	39.5985	0	0	12.1684	0.241888	3.44178	0.07028	0.943971	0.999994	1.18254	NO	NO	NO	NO
dd_Smed_v6_10182_0_3	35	162	85	57	165	159	35.5471	150.352	104.401	59.3977	154.218	135.647	106.594	0.267192	0.615634	0.434011	0.664281	0.999994	1.20346	NO	NO	NO	NO
dd_Smed_v6_10182_0_4	133	47	47	58	18	61	135.079	43.6208	57.7274	60.4398	16.8238	52.0408	60.9553	-0.871826	0.672551	-1.2963	0.194873	0.999994	-1.82998	-1.82998	NO	NO	NO
dd_Smed_v6_10183_0_1	358	340	250	319	428	440	363.596	315.555	307.06	332.419	400.033	375.376	349.007	0.167855	0.148413	1.131	0.258056	0.999994	1.12339	NO	NO	NO	NO
dd_Smed_v6_10184_0_1	451	503	368	426	501	555	458.05	466.835	451.993	443.92	468.263	473.486	460.424	0.00942587	0.0988624	0.0953433	0.924042	0.999994	1.00655	NO	NO	NO	NO
dd_Smed_v6_10184_0_2	0	0	0	0	0	0	0	0	0	0	0	0	0	#N/A	N/A	N/A	N/A	N/A	#N/A	#N/A	#N/A	#N/A	#N/A
dd_Smed_v6_101842_0_1	0	0	0	0	0	0	0	0	0	0	0	0	0	#N/A	N/A	N/A	N/A	N/A	#N/A	#N/A	#N/A	#N/A	#N/A
dd_Smed_v6_10185_0_1	316	344	257	322	298	315	320.94	319.267	315.658	335.545	278.527	268.735	306.445	-0.117183	0.148463	-0.789309	0.429931	0.999994	-1.08461	NO	NO	NO	NO
dd_Smed_v6_10186_0_1	39	47	15	53	34	18	39.6097	43.6208	18.4236	55.2294	31.7783	15.3563	34.003	-0.000509843	0.657416	-0.000775525	0.999381	0.999994	-1.00035	NO	NO	NO	NO
dd_Smed_v6_10186_0_2	4	0	14	0	7	23	4.06253	0	17.1954	0	6.54259	19.6219	7.90374	0.312685	2.01081	0.155502	0.876426	0.999994	1.24202	NO	NO	NO	NO
dd_Smed_v6_10186_0_3	6	27	1	0	32	3	6.09379	25.0587	1.22824	0	29.909	2.55938	10.8082	-0.00112326	1.77762	-0.000631891	0.999496	0.999994	-1.00078	NO	NO	NO	NO
dd_Smed_v6_10186_0_4	340	311	283	328	331	405	345.315	288.64	347.592	341.797	309.371	345.517	329.705	0.0243567	0.145478	0.167426	0.867035	0.999994	1.01703	NO	NO	NO	NO
dd_Smed_v6_10186_0_5	3	7	3	0	0	20	3.0469	6.49671	3.68473	0	0	17.0626	5.04848	0.371965	2.07515	0.179247	0.857744	N/A	1.29411	NO	NO	NO	NO
dd_Smed_v6_10186_0_6	0	10	0	4	12	0	0	9.28102	0	4.16826	11.2159	0	4.11086	0.716563	2.67482	0.267892	0.788782	N/A	1.64326	NO	NO	1.64326	NO
dd_Smed_v6_10187_0_1	249	302	211	254	290	363	252.892	280.287	259.159	264.684	271.05	309.685	272.96	0.0941177	0.14579	0.645572	0.518557	0.999994	1.06741	NO	NO	NO	NO
dd_Smed_v6_101878_0_1	0	0	0	0	0	2	0	0	0	0	0	1.70626	0.284376	3.89923	4.68472	0.832329	0.405223	N/A	14.9206	NO	NO	14.9206	NO
dd_Smed_v6_10188_0_1	70	62	63	67	58	67	71.0942	57.5423	77.3792	69.8183	54.2101	57.1596	64.534	-0.183281	0.292086	-0.627489	0.530338	0.999994	-1.13546	NO	NO	NO	NO
dd_Smed_v6_101884_0_1	0	0	0	0	0	0	0	0	0	0	0	0	0	#N/A	N/A	N/A	N/A	N/A	#N/A	#N/A	#N/A	#N/A	#N/A
dd_Smed_v6_101885_0_1	0	2	1	0	0	0	0	1.8562	1.22824	0	0	0	0.514074	-4.89494	4.63946	-1.05507	0.291395	N/A	-29.7524	-29.7524	NO	NO	NO
dd_Smed_v6_10189_0_1	307	361	246	317	390	378	311.799	335.045	302.147	330.334	364.516	322.482	327.721	0.0983643	0.129473	0.759726	0.447419	0.999994	1.07056	NO	NO	NO	NO
dd_Smed_v6_101893_0_1	0	0	0	0	0	1	0	0	0	0	0	0.853128	0.142188	2.91349	4.80177	0.606754	0.544014	N/A	7.53439	NO	NO	7.53439	NO
dd_Smed_v6_101897_0_1	0	0	1	0	0	0	0	0	1.22824	0	0	0	0.204707	-3.51601	4.76036	-0.738603	0.460148	N/A	-11.44	-11.44	NO	NO	NO
dd_Smed_v6_1019_0_1	3423	3474	2857	2845	3783	4478	3476.51	3224.23	3509.09	2964.67	3535.8	3820.31	3421.77	0.0161758	0.108426	0.149187	0.881406	0.999994	1.01128	NO	NO	NO	NO
dd_Smed_v6_10190_0_1	50	58	45	51	34	42	50.7816	53.8299	55.2709	53.1453	31.7783	35.8314	46.7729	-0.409725	0.357302	-1.14672	0.251497	0.999994	-1.32843	NO	NO	NO	NO
dd_Smed_v6_10190_0_2	63	90	51	62	70	54	63.9848	83.5292	62.6403	64.608	65.4259	46.0689	64.3762	-0.261989	0.316892	-0.826745	0.408381	0.999994	-1.19913	NO	NO	NO	NO
dd_Smed_v6_10190_0_3	25	36	26	30	26	24	25.3908	33.4117	31.9343	31.2619	24.3011	20.4751	27.7958	-0.260657	0.423413	-0.615608	0.538153	0.999994	-1.19802	NO	NO	NO	NO
dd_Smed_v6_10190_0_4	2	1	1	2	3	3	2.03126	0.928102	1.22824	2.08413	2.80397	2.55938	1.93918	0.835391	1.38752	0.602074	0.547125	N/A	1.78434	NO	NO	1.78434	NO
dd_Smed_v6_10190_0_5	8	15	3	12	6	2	8.12506	13.9215	3.68473	12.5048	5.60794	1.70626	7.59171	-0.402387	1.06824	-0.376682	0.70641	0.999994	-1.32169	NO	NO	NO	NO
dd_Smed_v6_10190_0_6	0	0	0	0	0	0	0	0	0	0	0	0	0	#N/A	N/A	N/A	N/A	N/A	#N/A	#N/A	#N/A	#N/A	#N/A
dd_Smed_v6_101901_0_1	0	1	3	0	0	0	0	0.928102	3.68473	0	0	0	0.768805	-5.46281	4.36727	-1.25085	0.210988	N/A	-44.1033	-44.1033	NO	NO	NO
dd_Smed_v6_10191_0_1	159	143	112	146	92	65	161.485	132.719	137.563	152.141	85.9884	55.4533	120.892	-0.560213	0.418825	-1.33758	0.181033	0.999994	-1.47449	-1.47449	NO	NO	NO
dd_Smed_v6_101910_0_1	0	2	1	0	1	3	0	1.8562	1.22824	0	0.934656	2.55938	1.09641	0.197675	2.33877	0.0845209	0.932642	N/A	1.14685	NO	NO	NO	NO
dd_Smed_v6_101914_0_1	0	1	1	0	0	0	0	0.928102	1.22824	0	0	0	0.359391	-4.37004	4.67295	-0.93518	0.349696	N/A	-20.6783	-20.6783	NO	NO	NO
dd_Smed_v6_10192_0_1	770	783	613	662	903	986	782.037	726.704	752.912	689.847	843.994	841.184	772.78	0.0718732	0.11926	0.602658	0.546737	0.999994	1.05108	NO	NO	NO	NO
dd_Smed_v6_10193_0_1	28	56	21	62	43	63	28.4377	51.9737	25.7931	64.608	40.1902	53.7471	44.125	0.568202	0.457902	1.24088	0.21465	0.999994	1.48267	NO	NO	1.48267	NO
dd_Smed_v6_10193_0_2	116	103	104	94	113	134	117.813	95.5945	127.737	97.9541	105.616	114.319	109.839	-0.0956926	0.229845	-0.416336	0.677164	0.999994	-1.06858	NO	NO	NO	NO
dd_Smed_v6_101932_0_1	0	1	0	1	0	3	0	0.928102	0	1.04206	0	2.55938	0.754925	1.89844	3.22621	0.588442	0.556236	N/A	3.72809	NO	NO	3.72809	NO
dd_Smed_v6_10194_0_1	186	221	156	188	255	304	188.908	205.11	191.606	195.908	238.337	259.351	213.203	0.245635	0.181314	1.35475	0.175498	0.999994	1.18561	NO	NO	NO	NO
dd_Smed_v6_101944_0_1	0	0	0	0	0	0	0	0	0	0	0	0	0	#N/A	N/A	N/A	N/A	N/A	#N/A	#N/A	#N/A	#N/A	#N/A
dd_Smed_v6_10195_0_1	79	117	80	76	78	129	80.2349	108.588	98.2593	79.1969	72.9032	110.053	91.5393	-0.128839	0.296289	-0.434842	0.663677	0.999994	-1.09341	NO	NO	NO	NO
dd_Smed_v6_10196_0_1	20	26	22	31	17	23	20.3126	24.1306	27.0213	32.304	15.8892	19.6219	23.2133	-0.0792539	0.508021	-0.156005	0.876029	0.999994	-1.05647	NO	NO	NO	NO
dd_Smed_v6_101969_0_1	0	0	0	0	0	0	0	0	0	0	0	0	0	#N/A	N/A	N/A	N/A	N/A	#N/A	#N/A	#N/A	#N/A	#N/A
dd_Smed_v6_10198_0_1	368	387	323	380	380	303	373.753	359.175	396.722	395.985	355.169	258.498	356.55	-0.163202	0.201482	-0.810007	0.417936	0.999994	-1.11977	NO	NO	NO	NO
dd_Smed_v6_10199_0_1	397	386	275	299	388	433	403.206	358.247	337.767	311.577	362.647	369.404	357.141	-0.0746215	0.146487	-0.509406	0.610467	0.999994	-1.05308	NO	NO	NO	NO
dd_Smed_v6_101992_0_1	0	0	0	0	1	0	0	0	0	0	0.934656	0	0.155776	3.01414	4.78601	0.62978	0.528838	N/A	8.07877	NO	NO	8.07877	NO
dd_Smed_v6_102_0_1	1558	1583	1180	1298	1001	1275	1582.35	1469.19	1449.33	1352.6	935.591	1087.74	1312.8	-0.41564	0.152329	-2.72857	0.00636101	0.286009	-1.33389	NO	NO	NO	NO
dd_Smed_v6_1020_0_1	1841	1939	1578	1745	1803	2063	1869.78	1799.59	1938.17	1818.4	1685.18	1760	1811.85	-0.090718	0.0651546	-1.39235	0.163816	0.999994	-1.0649	NO	NO	NO	NO
dd_Smed_v6_10200_0_1	267	246	195	234	270	294	271.174	228.313	239.507	243.843	252.357	250.82	247.669	0.0160649	0.145868	0.110133	0.912304	0.999994	1.0112	NO	NO	NO	NO
dd_Smed_v6_102007_0_1	0	0	0	0	0	0	0	0	0	0	0	0	0	#N/A	N/A	N/A	N/A	N/A	#N/A	#N/A	#N/A	#N/A	#N/A
dd_Smed_v6_10201_0_1	342	334	259	355	349	297	347.346	309.986	318.115	369.933	326.195	253.379	320.826	-0.0408954	0.191526	-0.213524	0.830918	0.999994	-1.02875	NO	NO	NO	NO
dd_Smed_v6_102010_0_1	0	0	0	0	0	0	0	0	0	0	0	0	0	#N/A	N/A	N/A	N/A	N/A	#N/A	#N/A	#N/A	#N/A	#N/A
dd_Smed_v6_102015_0_1	0	1	2	0	1	0	0	0.928102	2.45648	0	0.934656	0	0.719874	-1.83582	3.25461	-0.564066	0.572709	N/A	-3.56973	-3.56973	NO	NO	NO
dd_Smed_v6_10203_0_1	274	320	239	317	338	355	278.283	296.993	293.55	330.334	315.914	302.86	302.989	0.126403	0.123632	1.02241	0.306587	0.999994	1.09157	NO	NO	NO	NO
dd_Smed_v6_102032_0_1	1	0	0	0	0	1	1.01563	0	0	0	0	0.853128	0.31146	-0.230366	4.27327	-0.0539086	0.957008	N/A	-1.17313	NO	NO	NO	NO
dd_Smed_v6_102047_0_1	0	1	0	0	0	0	0	0.928102	0	0	0	0	0.154684	-3.20437	4.80681	-0.666631	0.505008	N/A	-9.21747	-9.21747	NO	NO	NO
dd_Smed_v6_10205_0_1	628	672	548	629	708	879	637.817	623.684	673.077	655.459	661.736	749.899	666.945	0.0978467	0.104181	0.939196	0.34763	0.999994	1.07017	NO	NO	NO	NO
dd_Smed_v6_102050_0_1	0	0	1	0	0	0	0	0	1.22824	0	0	0	0.204707	-3.51601	4.76036	-0.738603	0.460148	N/A	-11.44	-11.44	NO	NO	NO
dd_Smed_v6_10206_0_1	221	213	198	216	230	271	224.455	197.686	243.192	225.086	214.971	231.198	222.764	0.016558	0.158744	0.104306	0.916926	0.999994	1.01154	NO	NO	NO	NO
dd_Smed_v6_102062_0_1	0	1	0	0	0	0	0	0.928102	0	0	0	0	0.154684	-3.20437	4.80681	-0.666631	0.505008	N/A	-9.21747	-9.21747	NO	NO	NO
dd_Smed_v6_10207_0_1	228	257	216	234	268	284	231.564	238.522	265.3	243.843	250.488	242.288	245.334	0.00502197	0.139602	0.0359735	0.971303	0.999994	1.00349	NO	NO	NO	NO
dd_Smed_v6_102076_0_1	1	0	0	0	1	0	1.01563	0	0	0	0.934656	0	0.325048	-0.12972	4.25555	-0.0304825	0.975682	N/A	-1.09408	NO	NO	NO	NO
dd_Smed_v6_10208_0_1	20	32	18	19	26	27	20.3126	29.6993	22.1084	19.7992	24.3011	23.0345	23.2092	-0.106411	0.446206	-0.23848	0.811509	0.999994	-1.07655	NO	NO	NO	NO
dd_Smed_v6_10208_0_2	312	381	282	337	380	400	316.877	353.607	346.364	351.176	355.169	341.251	344.074	0.0427015	0.118556	0.360181	0.718712	0.999994	1.03004	NO	NO	NO	NO
dd_Smed_v6_102081_0_1	0	0	0	0	2	0	0	0	0	0	1.86931	0	0.311552	4.01314	4.67553	0.858328	0.390711	N/A	16.1464	NO	NO	16.1464	NO
dd_Smed_v6_102084_0_1	0	0	0	0	0	0	0	0	0	0	0	0	0	#N/A	N/A	N/A	N/A	N/A	#N/A	#N/A	#N/A	#N/A	#N/A
dd_Smed_v6_10209_0_1	153	154	114	164	138	186	155.392	142.928	140.02	170.899	128.983	158.682	149.484	0.0633557	0.203081	0.311973	0.755061	0.999994	1.04489	NO	NO	NO	NO
dd_Smed_v6_102093_0_1	1	0	0	0	0	0	1.01563	0	0	0	0	0	0.169272	-3.30343	4.791	-0.689508	0.490504	N/A	-9.8726	-9.8726	NO	NO	NO
dd_Smed_v6_1021_0_1	5600	5438	5112	5039	6154	7246	5687.54	5047.02	6278.77	5250.96	5751.87	6181.76	5699.66	0.0149678	0.104125	0.143749	0.885699	0.999994	1.01043	NO	NO	NO	NO
dd_Smed_v6_10210_0_1	398	493	379	477	454	378	404.222	457.554	465.504	497.065	424.334	322.482	428.527	-0.0949187	0.199927	-0.474766	0.634954	0.999994	-1.06801	NO	NO	NO	NO
dd_Smed_v6_102101_0_1	0	0	0	0	0	0	0	0	0	0	0	0	0	#N/A	N/A	N/A	N/A	N/A	#N/A	#N/A	#N/A	#N/A	#N/A
dd_Smed_v6_102108_0_1	0	0	0	0	1	0	0	0	0	0	0.934656	0	0.155776	3.01414	4.78601	0.62978	0.528838	N/A	8.07877	NO	NO	8.07877	NO
dd_Smed_v6_10211_0_1	57	60	37	39	66	67	57.891	55.6861	45.4449	40.6405	61.6873	57.1596	53.0849	0.00396796	0.333083	0.0119129	0.990495	0.999994	1.00275	NO	NO	NO	NO
dd_Smed_v6_10211_0_2	177	156	119	146	111	152	179.767	144.784	146.161	152.141	103.747	129.675	142.713	-0.290048	0.242441	-1.19636	0.231555	0.999994	-1.22268	NO	NO	NO	NO
dd_Smed_v6_102111_0_1	0	0	0	0	0	0	0	0	0	0	0	0	0	#N/A	N/A	N/A	N/A	N/A	#N/A	#N/A	#N/A	#N/A	#N/A
dd_Smed_v6_102114_0_1	0	0	0	0	0	0	0	0	0	0	0	0	0	#N/A	N/A	N/A	N/A	N/A	#N/A	#N/A	#N/A	#N/A	#N/A
dd_Smed_v6_102119_0_1	0	0	0	0	0	0	0	0	0	0	0	0	0	#N/A	N/A	N/A	N/A	N/A	#N/A	#N/A	#N/A	#N/A	#N/A
dd_Smed_v6_10212_0_1	132	135	122	129	107	175	134.063	125.294	149.846	134.426	100.008	149.297	132.156	-0.0897298	0.245707	-0.36519	0.714969	0.999994	-1.06417	NO	NO	NO	NO
dd_Smed_v6_102126_0_1	0	0	0	0	0	0	0	0	0	0	0	0	0	#N/A	N/A	N/A	N/A	N/A	#N/A	#N/A	#N/A	#N/A	#N/A
dd_Smed_v6_10213_0_1	46	36	27	33	35	31	46.7191	33.4117	33.1625	34.3881	32.713	26.447	34.4736	-0.281369	0.386079	-0.728786	0.466133	0.999994	-1.21535	NO	NO	NO	NO
dd_Smed_v6_102135_0_1	0	0	0	0	1	0	0	0	0	0	0.934656	0	0.155776	3.01414	4.78601	0.62978	0.528838	N/A	8.07877	NO	NO	8.07877	NO
dd_Smed_v6_102138_0_1	0	0	0	0	0	0	0	0	0	0	0	0	0	#N/A	N/A	N/A	N/A	N/A	#N/A	#N/A	#N/A	#N/A	#N/A
dd_Smed_v6_10214_0_1	64	96	36	213	79	42	65.0005	89.0978	44.2167	221.96	73.8378	35.8314	88.324	0.737734	0.703493	1.04867	0.294329	0.999994	1.66755	NO	NO	1.66755	NO
dd_Smed_v6_10214_0_2	249	183	126	231	206	167	252.892	169.843	154.758	240.717	192.539	142.472	192.204	-0.00721375	0.313679	-0.0229972	0.981652	0.999994	-1.00501	NO	NO	NO	NO
dd_Smed_v6_10214_0_3	1	2	2	21	6	1	1.01563	1.8562	2.45648	21.8834	5.60794	0.853128	5.61212	2.41407	1.45562	1.65845	0.0972268	0.999994	5.32975	NO	NO	5.32975	NO
dd_Smed_v6_10214_0_4	1	5	3	16	8	1	1.01563	4.64051	3.68473	16.673	7.47725	0.853128	5.72405	1.41096	1.34566	1.04852	0.294397	0.999994	2.65914	NO	NO	2.65914	NO
dd_Smed_v6_102145_0_1	0	0	0	0	0	0	0	0	0	0	0	0	0	#N/A	N/A	N/A	N/A	N/A	#N/A	#N/A	#N/A	#N/A	#N/A
dd_Smed_v6_10215_0_1	112	136	96	147	185	160	113.751	126.222	117.911	153.184	172.911	136.5	136.747	0.368246	0.201114	1.83103	0.0670958	0.921844	1.29078	NO	NO	NO	NO
dd_Smed_v6_10216_0_1	147	154	120	112	167	188	149.298	142.928	147.389	116.711	156.088	160.388	145.467	-0.0179021	0.213372	-0.0839011	0.933135	0.999994	-1.01249	NO	NO	NO	NO
dd_Smed_v6_102162_0_1	0	0	0	0	0	0	0	0	0	0	0	0	0	#N/A	N/A	N/A	N/A	N/A	#N/A	#N/A	#N/A	#N/A	#N/A
dd_Smed_v6_10217_0_1	144	163	116	126	200	275	146.251	151.281	142.476	131.3	186.931	234.61	165.475	0.331421	0.273872	1.21013	0.226228	0.999994	1.25825	NO	NO	NO	NO
dd_Smed_v6_10217_0_2	52	56	53	59	84	74	52.8129	51.9737	65.0968	61.4818	78.5111	63.1315	62.168	0.263468	0.290305	0.907555	0.364113	0.999994	1.20036	NO	NO	NO	NO
dd_Smed_v6_102171_0_1	0	0	0	0	0	0	0	0	0	0	0	0	0	#N/A	N/A	N/A	N/A	N/A	#N/A	#N/A	#N/A	#N/A	#N/A
dd_Smed_v6_10218_0_1	132	78	85	70	111	140	134.063	72.3919	104.401	72.9445	103.747	119.438	101.164	-0.0662516	0.359787	-0.184141	0.853903	0.999994	-1.04699	NO	NO	NO	NO
dd_Smed_v6_10218_0_2	201	289	184	233	267	277	204.142	268.221	225.996	242.801	249.553	236.316	237.838	0.0591692	0.170735	0.346555	0.728926	0.999994	1.04187	NO	NO	NO	NO
dd_Smed_v6_10219_0_1	89	127	109	110	131	144	90.3913	117.869	133.878	114.627	122.44	122.85	117.009	0.0770723	0.239073	0.32238	0.747165	0.999994	1.05488	NO	NO	NO	NO
dd_Smed_v6_102193_0_1	0	0	1	0	1	0	0	0	1.22824	0	0.934656	0	0.360483	-0.342303	4.22103	-0.0810948	0.935367	N/A	-1.26778	NO	NO	NO	NO
dd_Smed_v6_1022_0_1	1869	1868	1623	1540	1914	2206	1898.22	1733.69	1993.44	1604.78	1788.93	1882	1816.84	-0.0912155	0.0971046	-0.939353	0.347549	0.999994	-1.06527	NO	NO	NO	NO
dd_Smed_v6_10220_0_1	190	227	206	230	270	302	192.97	210.679	253.018	239.675	252.357	257.645	234.391	0.195433	0.170105	1.1489	0.250598	0.999994	1.14507	NO	NO	NO	NO
dd_Smed_v6_10221_0_1	282	312	250	289	343	358	286.408	289.568	307.06	301.157	320.587	305.42	301.7	0.0721339	0.122029	0.591123	0.554438	0.999994	1.05127	NO	NO	NO	NO
dd_Smed_v6_102217_0_1	0	0	0	0	1	0	0	0	0	0	0.934656	0	0.155776	3.01414	4.78601	0.62978	0.528838	N/A	8.07877	NO	NO	8.07877	NO
dd_Smed_v6_10222_0_1	138	177	127	130	122	140	140.157	164.274	155.987	135.468	114.028	119.438	138.225	-0.321793	0.193939	-1.65925	0.0970655	0.999994	-1.24988	NO	NO	NO	NO
dd_Smed_v6_10222_0_2	97	117	87	134	153	153	98.5163	108.588	106.857	139.637	143.002	130.529	121.188	0.395445	0.190885	2.07163	0.0382995	0.769256	1.31535	NO	NO	NO	NO
dd_Smed_v6_102222_0_1	0	0	0	0	1	0	0	0	0	0	0.934656	0	0.155776	3.01414	4.78601	0.62978	0.528838	N/A	8.07877	NO	NO	8.07877	NO
dd_Smed_v6_102223_0_1	0	0	0	0	0	1	0	0	0	0	0	0.853128	0.142188	2.91349	4.80177	0.606754	0.544014	N/A	7.53439	NO	NO	7.53439	NO
dd_Smed_v6_102226_0_1	0	0	0	1	0	0	0	0	0	1.04206	0	0	0.173677	3.13559	4.76834	0.657585	0.510805	N/A	8.78834	NO	NO	8.78834	NO
dd_Smed_v6_10223_0_1	217	231	187	174	233	248	220.392	214.391	229.681	181.319	217.775	211.576	212.522	-0.118615	0.158543	-0.748158	0.454365	0.999994	-1.08569	NO	NO	NO	NO
dd_Smed_v6_102237_0_1	0	0	0	0	1	0	0	0	0	0	0.934656	0	0.155776	3.01414	4.78601	0.62978	0.528838	N/A	8.07877	NO	NO	8.07877	NO
dd_Smed_v6_10224_0_1	19	21	19	21	17	26	19.297	19.4901	23.3366	21.8834	15.8892	22.1813	20.3463	-0.0467857	0.466166	-0.100363	0.920056	0.999994	-1.03296	NO	NO	NO	NO
dd_Smed_v6_10225_0_1	353	394	343	386	473	475	358.518	365.672	421.287	402.237	442.092	405.236	399.174	0.12824	0.128271	0.99976	0.317427	0.999994	1.09296	NO	NO	NO	NO
dd_Smed_v6_102256_0_1	0	0	0	0	0	0	0	0	0	0	0	0	0	#N/A	N/A	N/A	N/A	N/A	#N/A	#N/A	#N/A	#N/A	#N/A
dd_Smed_v6_10226_0_1	173	195	144	148	167	223	175.704	180.98	176.867	154.226	156.088	190.248	172.352	-0.0899528	0.179641	-0.500736	0.616557	0.999994	-1.06434	NO	NO	NO	NO
dd_Smed_v6_102261_0_1	0	0	0	0	1	0	0	0	0	0	0.934656	0	0.155776	3.01414	4.78601	0.62978	0.528838	N/A	8.07877	NO	NO	8.07877	NO
dd_Smed_v6_102264_0_1	0	0	0	0	0	0	0	0	0	0	0	0	0	#N/A	N/A	N/A	N/A	N/A	#N/A	#N/A	#N/A	#N/A	#N/A
dd_Smed_v6_102268_0_1	0	0	0	0	0	0	0	0	0	0	0	0	0	#N/A	N/A	N/A	N/A	N/A	#N/A	#N/A	#N/A	#N/A	#N/A
dd_Smed_v6_102269_0_1	0	0	0	0	1	0	0	0	0	0	0.934656	0	0.155776	3.01414	4.78601	0.62978	0.528838	N/A	8.07877	NO	NO	8.07877	NO
dd_Smed_v6_10227_0_1	11	9	5	2	6	10	11.172	8.35292	6.14121	2.08413	5.60794	8.53128	6.98157	-0.651104	0.894802	-0.727651	0.466827	0.999994	-1.57037	-1.57037	NO	NO	NO
dd_Smed_v6_10227_0_5	2	2	0	1	1	1	2.03126	1.8562	0	1.04206	0.934656	0.853128	1.11955	-0.496496	1.90354	-0.260828	0.794225	N/A	-1.41078	-1.41078	NO	NO	NO
dd_Smed_v6_10227_0_6	1	4	0	2	0	0	1.01563	3.71241	0	2.08413	0	0	1.13536	-1.22804	3.01953	-0.406698	0.68423	N/A	-2.34248	-2.34248	NO	NO	NO
dd_Smed_v6_10227_0_7	0	0	0	0	0	0	0	0	0	0	0	0	0	#N/A	N/A	N/A	N/A	N/A	#N/A	#N/A	#N/A	#N/A	#N/A
dd_Smed_v6_10227_0_8	0	0	0	0	0	0	0	0	0	0	0	0	0	#N/A	N/A	N/A	N/A	N/A	#N/A	#N/A	#N/A	#N/A	#N/A
dd_Smed_v6_10227_1_1	9	29	16	24	14	18	9.14069	26.915	19.6519	25.0096	13.0852	15.3563	18.1931	-0.0666845	0.659569	-0.101103	0.919469	0.999994	-1.04731	NO	NO	NO	NO
dd_Smed_v6_102271_0_1	0	0	0	0	1	0	0	0	0	0	0.934656	0	0.155776	3.01414	4.78601	0.62978	0.528838	N/A	8.07877	NO	NO	8.07877	NO
dd_Smed_v6_10228_0_1	241	225	195	285	235	228	244.767	208.823	239.507	296.988	219.644	194.513	234.041	0.0356731	0.225452	0.158229	0.874276	0.999994	1.02503	NO	NO	NO	NO
dd_Smed_v6_10229_0_1	165	236	116	186	206	182	167.579	219.032	142.476	193.824	192.539	155.269	178.453	0.0287539	0.244927	0.117398	0.906545	0.999994	1.02013	NO	NO	NO	NO
dd_Smed_v6_10229_0_2	6	1	1	7	10	2	6.09379	0.928102	1.22824	7.29445	9.34656	1.70626	4.4329	1.14084	1.32182	0.863087	0.38809	N/A	2.2051	NO	NO	2.2051	NO
dd_Smed_v6_10229_0_3	4	6	0	2	0	0	4.06253	5.56861	0	2.08413	0	0	1.95254	-2.25469	2.65971	-0.84772	0.396594	N/A	-4.77233	-4.77233	NO	NO	NO
dd_Smed_v6_10229_0_4	9	14	3	11	10	5	9.14069	12.9934	3.68473	11.4627	9.34656	4.26564	8.48229	-0.0670589	0.872225	-0.0768825	0.938717	0.999994	-1.04758	NO	NO	NO	NO
dd_Smed_v6_1023_0_1	3739	4261	3504	3542	4332	5154	3797.45	3954.64	4303.76	3690.99	4048.93	4397.02	4032.13	0.0103472	0.0897903	0.115238	0.908257	0.999994	1.0072	NO	NO	NO	NO
dd_Smed_v6_10230_0_1	0	0	0	0	0	0	0	0	0	0	0	0	0	#N/A	N/A	N/A	N/A	N/A	#N/A	#N/A	#N/A	#N/A	#N/A
dd_Smed_v6_102304_0_1	0	0	1	2	0	0	0	0	1.22824	2.08413	0	0	0.552062	0.793795	4.08373	0.19438	0.845878	N/A	1.73363	NO	NO	1.73363	NO
dd_Smed_v6_102306_0_1	0	0	0	1	0	2	0	0	0	1.04206	0	1.70626	0.458053	4.57028	4.6395	0.98508	0.324585	N/A	23.757	NO	NO	23.757	NO
dd_Smed_v6_10231_0_1	43	50	33	39	25	28	43.6722	46.4051	40.532	40.6405	23.3664	23.8876	36.4173	-0.580698	0.410445	-1.4148	0.157127	0.999994	-1.49557	-1.49557	NO	NO	NO
dd_Smed_v6_10232_0_1	169	175	149	162	195	208	171.642	162.418	183.008	168.814	182.258	177.451	174.265	0.0349778	0.161138	0.217067	0.828156	0.999994	1.02454	NO	NO	NO	NO
dd_Smed_v6_102323_0_1	0	0	0	0	0	0	0	0	0	0	0	0	0	#N/A	N/A	N/A	N/A	N/A	#N/A	#N/A	#N/A	#N/A	#N/A
dd_Smed_v6_102329_0_1	0	1	0	0	0	1	0	0.928102	0	0	0	0.853128	0.296872	-0.131306	4.29099	-0.0306005	0.975588	N/A	-1.09528	NO	NO	NO	NO
dd_Smed_v6_10233_0_1	683	696	557	639	703	849	693.677	645.959	684.131	665.879	657.063	724.306	678.502	0.018255	0.0939074	0.194393	0.845868	0.999994	1.01273	NO	NO	NO	NO
dd_Smed_v6_102348_0_1	1	0	0	0	0	1	1.01563	0	0	0	0	0.853128	0.31146	-0.230366	4.27327	-0.0539086	0.957008	N/A	-1.17313	NO	NO	NO	NO
dd_Smed_v6_10235_0_1	289	341	229	307	310	322	293.518	316.483	281.267	319.914	289.743	274.707	295.939	-0.0148628	0.13963	-0.106444	0.91523	0.999994	-1.01036	NO	NO	NO	NO
dd_Smed_v6_10235_0_2	7	7	4	4	12	10	7.10942	6.49671	4.91297	4.16826	11.2159	8.53128	7.07242	0.369172	0.825979	0.446951	0.65491	0.999994	1.29161	NO	NO	NO	NO
dd_Smed_v6_102355_0_1	0	0	0	0	1	0	0	0	0	0	0.934656	0	0.155776	3.01414	4.78601	0.62978	0.528838	N/A	8.07877	NO	NO	8.07877	NO
dd_Smed_v6_10236_0_1	192	214	151	195	177	172	195.001	198.614	185.465	203.203	165.434	146.738	182.409	-0.172201	0.198127	-0.869142	0.38477	0.999994	-1.12678	NO	NO	NO	NO
dd_Smed_v6_102369_0_1	0	0	0	0	0	0	0	0	0	0	0	0	0	#N/A	N/A	N/A	N/A	N/A	#N/A	#N/A	#N/A	#N/A	#N/A
dd_Smed_v6_10237_0_1	158	193	133	187	237	182	160.47	179.124	163.356	194.866	221.513	155.269	179.1	0.1823	0.211716	0.861059	0.389206	0.999994	1.13469	NO	NO	NO	NO
dd_Smed_v6_102370_0_1	0	0	0	0	0	0	0	0	0	0	0	0	0	#N/A	N/A	N/A	N/A	N/A	#N/A	#N/A	#N/A	#N/A	#N/A
dd_Smed_v6_102379_0_1	0	0	0	0	0	0	0	0	0	0	0	0	0	#N/A	N/A	N/A	N/A	N/A	#N/A	#N/A	#N/A	#N/A	#N/A
dd_Smed_v6_10238_0_1	51	70	34	75	101	67	51.7972	64.9671	41.7602	78.1549	94.4003	57.1596	64.7065	0.527507	0.359293	1.46818	0.142056	0.999994	1.44144	NO	NO	1.44144	NO
dd_Smed_v6_10238_0_10	0	0	0	0	0	3	0	0	0	0	0	2.55938	0.426564	4.47843	4.64455	0.964234	0.334928	N/A	22.2916	NO	NO	22.2916	NO
dd_Smed_v6_10238_0_11	0	13	1	0	2	0	0	12.0653	1.22824	0	1.86931	0	2.52715	-2.83408	2.79442	-1.01419	0.310492	N/A	-7.13086	-7.13086	NO	NO	NO
dd_Smed_v6_10238_0_12	3	0	0	0	0	9	3.0469	0	0	0	0	7.67815	1.78751	1.3331	3.85341	0.345955	0.729377	N/A	2.51944	NO	NO	2.51944	NO
dd_Smed_v6_10238_0_2	35	13	19	3	0	23	35.5471	12.0653	23.3366	3.12619	0	19.6219	15.6162	-1.63139	1.34884	-1.20948	0.22648	0.999994	-3.09812	-3.09812	NO	NO	NO
dd_Smed_v6_10238_0_3	0	0	28	16	0	0	0	0	34.3908	16.673	0	0	8.51063	-1.04492	3.50839	-0.297833	0.765831	0.999994	-2.06325	-2.06325	NO	NO	NO
dd_Smed_v6_10238_0_4	0	26	0	0	0	0	0	24.1306	0	0	0	0	4.02177	-7.86362	4.57206	-1.71993	0.0854454	N/A	-232.909	-232.909	NO	NO	NO
dd_Smed_v6_10238_0_5	26	0	0	0	5	0	26.4064	0	0	0	4.67328	0	5.17995	-2.49829	3.50183	-0.713423	0.475584	N/A	-5.65014	-5.65014	NO	NO	NO
dd_Smed_v6_10238_0_6	0	22	0	0	0	0	0	20.4182	0	0	0	0	3.40304	-7.62303	4.57387	-1.66665	0.0955844	N/A	-197.134	-197.134	NO	NO	NO
dd_Smed_v6_10238_0_7	0	0	21	1	23	1	0	0	25.7931	1.04206	21.4971	0.853128	8.19756	-0.133701	2.3993	-0.0557249	0.955561	0.999994	-1.0971	NO	NO	NO	NO
dd_Smed_v6_10238_0_8	10	1	0	27	0	31	10.1563	0.928102	0	28.1357	0	26.447	10.9445	2.29353	2.00426	1.14433	0.252487	0.999994	4.90255	NO	NO	4.90255	NO
dd_Smed_v6_10238_0_9	3	2	0	0	2	0	3.0469	1.8562	0	0	1.86931	0	1.12874	-1.39997	2.91645	-0.480024	0.63121	N/A	-2.63895	-2.63895	NO	NO	NO
dd_Smed_v6_10239_0_1	112	122	85	99	100	100	113.751	113.228	104.401	103.164	93.4656	85.3128	102.22	-0.237666	0.213559	-1.11289	0.265758	0.999994	-1.17908	NO	NO	NO	NO
dd_Smed_v6_102390_0_1	0	1	0	0	0	0	0	0.928102	0	0	0	0	0.154684	-3.20437	4.80681	-0.666631	0.505008	N/A	-9.21747	-9.21747	NO	NO	NO
dd_Smed_v6_102398_0_1	0	0	0	0	1	0	0	0	0	0	0.934656	0	0.155776	3.01414	4.78601	0.62978	0.528838	N/A	8.07877	NO	NO	8.07877	NO
dd_Smed_v6_102399_0_1	0	0	0	0	0	0	0	0	0	0	0	0	0	#N/A	N/A	N/A	N/A	N/A	#N/A	#N/A	#N/A	#N/A	#N/A
dd_Smed_v6_1024_0_1	1697	1805	1412	1544	2052	2302	1723.53	1675.22	1734.28	1608.95	1917.91	1963.9	1770.63	0.0980937	0.0987994	0.992857	0.32078	0.999994	1.07036	NO	NO	NO	NO
dd_Smed_v6_10240_0_1	104	126	89	98	101	139	105.626	116.941	109.314	102.122	94.4003	118.585	107.831	-0.0739281	0.216961	-0.340744	0.733296	0.999994	-1.05258	NO	NO	NO	NO
dd_Smed_v6_102403_0_1	0	0	0	0	1	0	0	0	0	0	0.934656	0	0.155776	3.01414	4.78601	0.62978	0.528838	N/A	8.07877	NO	NO	8.07877	NO
dd_Smed_v6_10241_0_1	96	109	87	96	112	114	97.5007	101.163	106.857	100.038	104.681	97.2566	101.25	-0.0155403	0.203924	-0.0762065	0.939255	0.999994	-1.01083	NO	NO	NO	NO
dd_Smed_v6_10242_0_1	15	25	17	24	19	15	15.2345	23.2025	20.8801	25.0096	17.7585	12.7969	19.147	-0.102558	0.541282	-0.189473	0.849722	0.999994	-1.07368	NO	NO	NO	NO
dd_Smed_v6_10242_0_12	4	5	3	7	3	4	4.06253	4.64051	3.68473	7.29445	2.80397	3.41251	4.31645	0.106757	0.997467	0.107028	0.914767	N/A	1.07681	NO	NO	NO	NO
dd_Smed_v6_10242_0_14	0	1	0	1	1	0	0	0.928102	0	1.04206	0.934656	0	0.484137	1.01993	3.52718	0.289164	0.772456	N/A	2.02783	NO	NO	2.02783	NO
dd_Smed_v6_10242_0_2	3	10	0	18	6	8	3.0469	9.28102	0	18.7572	5.60794	6.82502	7.25301	1.30726	1.31865	0.991361	0.32151	0.999994	2.47471	NO	NO	2.47471	NO
dd_Smed_v6_10242_0_4	8	0	3	9	4	10	8.12506	0	3.68473	9.37858	3.73862	8.53128	5.57638	0.880215	1.35178	0.651155	0.514947	0.999994	1.84065	NO	NO	1.84065	NO
dd_Smed_v6_10242_0_5	2	15	0	0	0	0	2.03126	13.9215	0	0	0	0	2.6588	-7.27092	3.67853	-1.97658	0.0480889	N/A	-154.442	-154.442	NO	NO	NO
dd_Smed_v6_102428_0_1	0	1	0	0	0	1	0	0.928102	0	0	0	0.853128	0.296872	-0.131306	4.29099	-0.0306005	0.975588	N/A	-1.09528	NO	NO	NO	NO
dd_Smed_v6_10243_0_1	297	308	220	265	329	359	301.643	285.855	270.213	276.147	307.502	306.273	291.272	0.0530251	0.133405	0.397475	0.691018	0.999994	1.03744	NO	NO	NO	NO
dd_Smed_v6_10244_0_1	181	355	177	148	262	94	183.829	329.476	217.399	154.226	244.88	80.194	201.667	-0.609803	0.457441	-1.33307	0.182507	0.999994	-1.52605	-1.52605	NO	NO	NO
dd_Smed_v6_10244_0_2	172	8	200	188	197	236	174.689	7.42481	245.648	195.908	184.127	201.338	168.189	0.444019	0.905193	0.490524	0.623763	0.999994	1.36039	NO	NO	NO	NO
dd_Smed_v6_10244_0_3	202	258	137	283	169	145	205.158	239.45	168.269	294.904	157.957	123.704	198.24	-0.0913531	0.381636	-0.239373	0.810817	0.999994	-1.06537	NO	NO	NO	NO
dd_Smed_v6_102442_0_1	0	0	0	0	0	0	0	0	0	0	0	0	0	#N/A	N/A	N/A	N/A	N/A	#N/A	#N/A	#N/A	#N/A	#N/A
dd_Smed_v6_10245_0_1	46	89	41	59	111	96	46.7191	82.6011	50.3579	61.4818	103.747	81.9003	71.1345	0.456586	0.393313	1.16087	0.245694	0.999994	1.37229	NO	NO	NO	NO
dd_Smed_v6_10245_0_4	7	0	11	0	0	0	7.10942	0	13.5107	0	0	0	3.43668	-7.62945	3.51569	-2.17012	0.029998	N/A	-198.012	-198.012	NO	NO	NO
dd_Smed_v6_102459_0_1	0	0	0	0	0	0	0	0	0	0	0	0	0	#N/A	N/A	N/A	N/A	N/A	#N/A	#N/A	#N/A	#N/A	#N/A
dd_Smed_v6_10246_0_1	357	381	301	402	432	460	362.581	353.607	369.701	418.91	403.771	392.439	383.501	0.162309	0.107828	1.50526	0.132258	0.999994	1.11908	NO	NO	NO	NO
dd_Smed_v6_10247_0_1	101	114	82	116	110	172	102.579	105.804	100.716	120.88	102.812	146.738	113.255	0.262113	0.237601	1.10317	0.269955	0.999994	1.19923	NO	NO	NO	NO
dd_Smed_v6_10248_0_1	200	182	129	252	246	214	203.126	168.915	158.443	262.6	229.925	182.569	200.93	0.344495	0.225008	1.53103	0.125761	0.999994	1.26971	NO	NO	NO	NO
dd_Smed_v6_10248_0_2	171	186	161	70	183	199	173.673	172.627	197.747	72.9445	171.042	169.772	159.634	-0.391946	0.374025	-1.04791	0.294679	0.999994	-1.31216	NO	NO	NO	NO
dd_Smed_v6_102482_0_1	0	0	1	0	0	0	0	0	1.22824	0	0	0	0.204707	-3.51601	4.76036	-0.738603	0.460148	N/A	-11.44	-11.44	NO	NO	NO
dd_Smed_v6_10249_0_1	244	347	150	411	121	75	247.814	322.051	184.236	428.289	113.093	63.9846	226.578	-0.318734	0.668847	-0.476543	0.633688	0.999994	-1.24724	NO	NO	NO	NO
dd_Smed_v6_10249_0_2	75	0	0	232	153	74	76.1724	0	0	241.759	143.002	63.1315	87.3442	2.55522	2.52808	1.01074	0.312142	0.999994	5.87758	NO	NO	5.87758	NO
dd_Smed_v6_102499_0_1	0	0	0	0	0	0	0	0	0	0	0	0	0	#N/A	N/A	N/A	N/A	N/A	#N/A	#N/A	#N/A	#N/A	#N/A
dd_Smed_v6_1025_0_1	7735	8716	6456	7048	8384	9679	7855.91	8089.33	7929.53	7344.47	7836.16	8257.42	7885.47	-0.0263943	0.0563259	-0.468599	0.639356	0.999994	-1.01846	NO	NO	NO	NO
dd_Smed_v6_10250_0_1	222	245	149	257	260	200	225.47	227.385	183.008	267.811	243.011	170.626	219.552	0.0960382	0.24283	0.395495	0.692478	0.999994	1.06883	NO	NO	NO	NO
dd_Smed_v6_102501_0_1	1	1	0	1	0	1	1.01563	0.928102	0	1.04206	0	0.853128	0.639821	-0.0779898	2.60134	-0.0299806	0.976083	N/A	-1.05555	NO	NO	NO	NO
dd_Smed_v6_102502_0_1	0	0	0	0	0	0	0	0	0	0	0	0	0	#N/A	N/A	N/A	N/A	N/A	#N/A	#N/A	#N/A	#N/A	#N/A
dd_Smed_v6_10251_0_1	108	113	114	101	142	176	109.688	104.875	140.02	105.249	132.721	150.151	123.784	0.137096	0.256884	0.533689	0.593557	0.999994	1.09969	NO	NO	NO	NO
dd_Smed_v6_102515_0_1	0	0	0	0	0	0	0	0	0	0	0	0	0	#N/A	N/A	N/A	N/A	N/A	#N/A	#N/A	#N/A	#N/A	#N/A
dd_Smed_v6_10252_0_1	116	153	133	117	171	174	117.813	142	163.356	121.922	159.826	148.444	142.227	0.0280999	0.234442	0.119859	0.904595	0.999994	1.01967	NO	NO	NO	NO
dd_Smed_v6_102524_0_1	0	0	0	0	0	0	0	0	0	0	0	0	0	#N/A	N/A	N/A	N/A	N/A	#N/A	#N/A	#N/A	#N/A	#N/A
dd_Smed_v6_10253_0_1	123	134	103	148	137	142	124.923	124.366	126.509	154.226	128.048	121.144	129.869	0.099708	0.202184	0.493154	0.621904	0.999994	1.07156	NO	NO	NO	NO
dd_Smed_v6_10255_0_1	204	224	175	235	276	253	207.189	207.895	214.942	244.885	257.965	215.841	224.786	0.189416	0.153576	1.23337	0.217437	0.999994	1.1403	NO	NO	NO	NO
dd_Smed_v6_10256_0_1	140	152	126	134	145	134	142.188	141.071	154.758	139.637	135.525	114.319	137.917	-0.170019	0.193214	-0.879952	0.378885	0.999994	-1.12507	NO	NO	NO	NO
dd_Smed_v6_10257_0_1	470	487	394	433	505	518	477.347	451.986	483.927	451.214	472.001	441.92	463.066	-0.0489412	0.101631	-0.481556	0.630121	0.999994	-1.03451	NO	NO	NO	NO
dd_Smed_v6_10258_0_1	16	23	14	28	18	9	16.2501	21.3463	17.1954	29.1778	16.8238	7.67815	18.0786	-0.0411465	0.677863	-0.0607004	0.951598	0.999994	-1.02893	NO	NO	NO	NO
dd_Smed_v6_10259_0_1	404	438	302	459	539	533	410.315	406.509	370.929	478.308	503.78	454.717	437.426	0.272213	0.113046	2.40797	0.0160414	0.485273	1.20766	NO	NO	NO	NO
dd_Smed_v6_1026_0_1	7506	7587	6002	7206	8665	7490	7623.33	7041.51	7371.91	7509.12	8098.79	6389.93	7339.1	-0.00263358	0.0971198	-0.0271168	0.978367	0.999994	-1.00183	NO	NO	NO	NO
dd_Smed_v6_10260_0_1	400	439	322	426	526	537	406.253	407.437	395.494	443.92	491.629	458.13	433.81	0.204643	0.10653	1.92098	0.0547338	0.865792	1.1524	NO	NO	NO	NO
dd_Smed_v6_102609_0_1	0	0	0	0	0	0	0	0	0	0	0	0	0	#N/A	N/A	N/A	N/A	N/A	#N/A	#N/A	#N/A	#N/A	#N/A
dd_Smed_v6_10261_0_1	125	144	132	157	140	168	126.954	133.647	162.128	163.604	130.852	143.325	143.418	0.0527189	0.212574	0.248002	0.804133	0.999994	1.03722	NO	NO	NO	NO
dd_Smed_v6_102613_0_1	0	0	0	0	0	0	0	0	0	0	0	0	0	#N/A	N/A	N/A	N/A	N/A	#N/A	#N/A	#N/A	#N/A	#N/A
dd_Smed_v6_10262_0_1	309	327	234	246	389	506	313.83	303.489	287.409	256.348	363.581	431.683	326.057	0.218343	0.230186	0.948552	0.342848	0.999994	1.1634	NO	NO	NO	NO
dd_Smed_v6_10263_0_1	209	208	160	181	241	256	212.267	193.045	196.519	188.614	225.252	218.401	205.683	0.0728011	0.162455	0.448132	0.654058	0.999994	1.05176	NO	NO	NO	NO
dd_Smed_v6_102633_0_1	0	0	0	0	0	0	0	0	0	0	0	0	0	#N/A	N/A	N/A	N/A	N/A	#N/A	#N/A	#N/A	#N/A	#N/A
dd_Smed_v6_102635_0_1	0	0	0	0	0	0	0	0	0	0	0	0	0	#N/A	N/A	N/A	N/A	N/A	#N/A	#N/A	#N/A	#N/A	#N/A
dd_Smed_v6_102636_0_1	0	0	0	1	0	0	0	0	0	1.04206	0	0	0.173677	3.13559	4.76834	0.657585	0.510805	N/A	8.78834	NO	NO	8.78834	NO
dd_Smed_v6_10264_0_1	68	98	72	69	76	91	69.063	90.954	88.4334	71.9025	71.0339	77.6346	78.1702	-0.170134	0.255797	-0.665114	0.505978	0.999994	-1.12516	NO	NO	NO	NO
dd_Smed_v6_10265_0_1	271	323	233	278	321	246	275.236	299.777	286.18	289.694	300.025	209.869	276.797	-0.109116	0.195757	-0.557405	0.577251	0.999994	-1.07857	NO	NO	NO	NO
dd_Smed_v6_102654_0_1	0	0	0	0	1	0	0	0	0	0	0.934656	0	0.155776	3.01414	4.78601	0.62978	0.528838	N/A	8.07877	NO	NO	8.07877	NO
dd_Smed_v6_10266_0_1	124	123	92	100	116	115	125.938	114.157	112.998	104.206	108.42	98.1097	110.638	-0.185945	0.199692	-0.931161	0.35177	0.999994	-1.13756	NO	NO	NO	NO
dd_Smed_v6_10267_0_1	314	344	232	264	326	376	318.908	319.267	284.952	275.105	304.698	320.776	303.951	-0.0360623	0.139265	-0.258947	0.795676	0.999994	-1.02531	NO	NO	NO	NO
dd_Smed_v6_102678_0_1	0	0	0	0	0	0	0	0	0	0	0	0	0	#N/A	N/A	N/A	N/A	N/A	#N/A	#N/A	#N/A	#N/A	#N/A
dd_Smed_v6_10268_0_1	148	129	108	144	136	113	150.314	119.725	132.65	150.057	127.113	96.4035	129.377	-0.110937	0.261207	-0.424709	0.671049	0.999994	-1.07993	NO	NO	NO	NO
dd_Smed_v6_102686_0_1	0	0	1	0	0	0	0	0	1.22824	0	0	0	0.204707	-3.51601	4.76036	-0.738603	0.460148	N/A	-11.44	-11.44	NO	NO	NO
dd_Smed_v6_10269_0_1	147	193	137	172	182	234	149.298	179.124	168.269	179.235	170.107	199.632	174.278	0.145018	0.179975	0.805765	0.420378	0.999994	1.10574	NO	NO	NO	NO
dd_Smed_v6_102692_0_1	0	0	0	0	0	0	0	0	0	0	0	0	0	#N/A	N/A	N/A	N/A	N/A	#N/A	#N/A	#N/A	#N/A	#N/A
dd_Smed_v6_1027_0_1	8272	8550	6604	7916	9172	9498	8401.31	7935.27	8111.31	8248.98	8572.67	8103.01	8228.76	0.0278678	0.0437994	0.63626	0.524607	0.999994	1.0195	NO	NO	NO	NO
dd_Smed_v6_1027_0_2	217	215	99	214	405	289	220.392	199.542	121.596	223.002	378.536	246.554	231.604	0.644887	0.333242	1.93519	0.0529664	0.859641	1.56362	NO	NO	1.56362	NO
dd_Smed_v6_10270_0_1	147	139	112	111	120	166	149.298	129.006	137.563	115.669	112.159	141.619	130.886	-0.167915	0.209747	-0.800559	0.423387	0.999994	-1.12343	NO	NO	NO	NO
dd_Smed_v6_102703_0_1	0	0	0	2	0	0	0	0	0	2.08413	0	0	0.347355	4.15022	4.66537	0.88958	0.373691	N/A	17.7558	NO	NO	17.7558	NO
dd_Smed_v6_10271_0_1	75	151	45	61	0	0	76.1724	140.143	55.2709	63.5659	0	0	55.8588	-2.09821	1.80695	-1.16119	0.245564	0.999994	-4.28178	-4.28178	NO	NO	NO
dd_Smed_v6_10271_0_2	0	62	0	235	309	294	0	57.5423	0	244.885	288.809	250.82	140.343	3.76672	2.36925	1.58983	0.111873	0.999994	13.6111	NO	NO	13.6111	NO
dd_Smed_v6_10271_0_3	334	195	252	168	120	46	339.221	180.98	309.517	175.067	112.159	39.2439	192.698	-1.34761	0.546234	-2.46709	0.0136216	0.442305	-2.5449	-2.5449	NO	NO	NO
dd_Smed_v6_102713_0_1	0	0	0	0	0	0	0	0	0	0	0	0	0	#N/A	N/A	N/A	N/A	N/A	#N/A	#N/A	#N/A	#N/A	#N/A
dd_Smed_v6_102715_0_1	0	0	0	0	0	1	0	0	0	0	0	0.853128	0.142188	2.91349	4.80177	0.606754	0.544014	N/A	7.53439	NO	NO	7.53439	NO
dd_Smed_v6_10272_0_1	251	305	231	243	277	318	254.924	283.071	283.724	253.222	258.9	271.295	267.522	-0.067374	0.134299	-0.501672	0.615898	0.999994	-1.04781	NO	NO	NO	NO
dd_Smed_v6_10273_0_1	419	469	319	408	469	504	425.55	435.28	391.809	425.162	438.354	429.976	424.355	0.0442169	0.107007	0.413216	0.679448	0.999994	1.03112	NO	NO	NO	NO
dd_Smed_v6_10273_0_2	16	12	8	13	13	5	16.2501	11.1372	9.82593	13.5468	12.1505	4.26564	11.196	-0.326028	0.749232	-0.43515	0.663454	0.999994	-1.25356	NO	NO	NO	NO
dd_Smed_v6_102731_0_1	0	0	0	0	0	0	0	0	0	0	0	0	0	#N/A	N/A	N/A	N/A	N/A	#N/A	#N/A	#N/A	#N/A	#N/A
dd_Smed_v6_10275_0_1	75	73	81	41	64	78	76.1724	67.7514	99.4876	42.7247	59.818	66.544	68.7497	-0.516692	0.332845	-1.55235	0.120579	0.999994	-1.43067	-1.43067	NO	NO	NO
dd_Smed_v6_102756_0_1	0	0	0	0	0	0	0	0	0	0	0	0	0	#N/A	N/A	N/A	N/A	N/A	#N/A	#N/A	#N/A	#N/A	#N/A
dd_Smed_v6_10276_0_1	292	355	260	338	403	451	296.565	329.476	319.343	352.218	376.666	384.761	343.171	0.237175	0.12204	1.94342	0.0519658	0.857373	1.17868	NO	NO	NO	NO
dd_Smed_v6_10277_0_1	143	94	59	69	130	135	145.235	87.2416	72.4663	71.9025	121.505	115.172	102.254	0.0168614	0.397273	0.0424427	0.966146	0.999994	1.01176	NO	NO	NO	NO
dd_Smed_v6_10277_0_2	60	103	80	86	135	158	60.9379	95.5945	98.2593	89.6176	126.179	134.794	100.897	0.464109	0.324563	1.42995	0.152732	0.999994	1.37947	NO	NO	NO	NO
dd_Smed_v6_10278_0_1	207	274	188	235	253	311	210.236	254.3	230.909	244.885	236.468	265.323	240.354	0.102243	0.156511	0.653263	0.513587	0.999994	1.07344	NO	NO	NO	NO
dd_Smed_v6_10279_0_1	192	204	138	192	201	219	195.001	189.333	169.497	200.076	187.866	186.835	188.101	0.0499264	0.158573	0.314848	0.752877	0.999994	1.03521	NO	NO	NO	NO
dd_Smed_v6_10279_0_2	15	31	27	20	23	12	15.2345	28.7712	33.1625	20.8413	21.4971	10.2375	21.624	-0.55559	0.599259	-0.927129	0.353859	0.999994	-1.46977	-1.46977	NO	NO	NO
dd_Smed_v6_102795_0_1	4	0	1	0	0	0	4.06253	0	1.22824	0	0	0	0.881795	-5.6713	4.25691	-1.33226	0.182775	N/A	-50.9602	-50.9602	NO	NO	NO
dd_Smed_v6_1028_0_1	25	30	6	17	12	33	25.3908	27.8431	7.36945	17.7151	11.2159	28.1532	19.6146	-0.0932419	0.738703	-0.126224	0.899555	0.999994	-1.06676	NO	NO	NO	NO
dd_Smed_v6_10280_0_1	294	295	203	219	309	307	298.596	273.79	249.333	228.212	288.809	261.91	266.775	-0.0775076	0.168074	-0.461152	0.64469	0.999994	-1.05519	NO	NO	NO	NO
dd_Smed_v6_10281_0_1	96	88	100	83	102	128	97.5007	81.673	122.824	86.4914	95.3349	109.2	98.8374	-0.0456656	0.270792	-0.168637	0.866082	0.999994	-1.03216	NO	NO	NO	NO
dd_Smed_v6_102810_0_1	0	0	0	0	0	0	0	0	0	0	0	0	0	#N/A	N/A	N/A	N/A	N/A	#N/A	#N/A	#N/A	#N/A	#N/A
dd_Smed_v6_10282_0_1	0	208	32	466	0	0	0	193.045	39.3037	485.602	0	0	119.659	1.0633	3.72677	0.285314	0.775404	0.999994	2.08971	NO	NO	2.08971	NO
dd_Smed_v6_10282_0_2	213	62	81	0	207	99	216.33	57.5423	99.4876	0	193.474	84.4597	108.549	-0.425408	1.34607	-0.316038	0.751974	0.999994	-1.34295	NO	NO	NO	NO
dd_Smed_v6_10284_0_1	61	76	48	76	60	36	61.9536	70.5357	58.9556	79.1969	56.0794	30.7126	59.5723	-0.212334	0.441222	-0.48124	0.630346	0.999994	-1.15856	NO	NO	NO	NO
dd_Smed_v6_102843_0_1	1	0	0	0	0	0	1.01563	0	0	0	0	0	0.169272	-3.30343	4.791	-0.689508	0.490504	N/A	-9.8726	-9.8726	NO	NO	NO
dd_Smed_v6_102845_0_1	0	0	0	0	0	0	0	0	0	0	0	0	0	#N/A	N/A	N/A	N/A	N/A	#N/A	#N/A	#N/A	#N/A	#N/A
dd_Smed_v6_10285_0_1	41	50	27	40	39	43	41.6409	46.4051	33.1625	41.6826	36.4516	36.6845	39.3379	-0.0868833	0.345393	-0.251549	0.80139	0.999994	-1.06207	NO	NO	NO	NO
dd_Smed_v6_10286_0_1	290	360	269	385	355	299	294.533	334.117	330.397	401.195	331.803	255.085	324.522	0.041286	0.212938	0.193888	0.846264	0.999994	1.02903	NO	NO	NO	NO
dd_Smed_v6_102860_0_1	0	0	0	0	0	0	0	0	0	0	0	0	0	#N/A	N/A	N/A	N/A	N/A	#N/A	#N/A	#N/A	#N/A	#N/A
dd_Smed_v6_102869_0_1	1	2	2	1	1	1	1.01563	1.8562	2.45648	1.04206	0.934656	0.853128	1.35969	-0.905614	1.61875	-0.559452	0.575853	N/A	-1.87334	-1.87334	NO	NO	NO
dd_Smed_v6_10287_0_1	153	167	153	113	147	198	155.392	154.993	187.921	117.753	137.394	168.919	153.729	-0.227224	0.230693	-0.984964	0.324642	0.999994	-1.17058	NO	NO	NO	NO
dd_Smed_v6_10287_0_2	156	179	139	190	207	227	158.439	166.13	170.726	197.992	193.474	193.66	180.07	0.241177	0.152942	1.57691	0.114816	0.999994	1.18196	NO	NO	NO	NO
dd_Smed_v6_102872_0_1	0	0	0	0	0	0	0	0	0	0	0	0	0	#N/A	N/A	N/A	N/A	N/A	#N/A	#N/A	#N/A	#N/A	#N/A
dd_Smed_v6_10288_0_1	410	471	326	390	426	402	416.409	437.136	400.407	406.405	398.163	342.957	400.246	-0.130793	0.128752	-1.01585	0.3097	0.999994	-1.0949	NO	NO	NO	NO
dd_Smed_v6_102883_0_1	0	0	0	0	0	0	0	0	0	0	0	0	0	#N/A	N/A	N/A	N/A	N/A	#N/A	#N/A	#N/A	#N/A	#N/A
dd_Smed_v6_10289_0_1	251	263	201	224	343	348	254.924	244.091	246.877	233.422	320.587	296.889	266.132	0.191735	0.178633	1.07335	0.283116	0.999994	1.14214	NO	NO	NO	NO
dd_Smed_v6_1029_0_1	1702	1817	1315	1786	1845	1831	1728.61	1686.36	1615.14	1861.13	1724.44	1562.08	1696.29	0.0321362	0.0902151	0.356217	0.721678	0.999994	1.02253	NO	NO	NO	NO
dd_Smed_v6_1029_1_1	1721	1821	1312	1479	1623	1946	1747.9	1690.07	1611.45	1541.21	1516.95	1660.19	1627.96	-0.0979878	0.0725377	-1.35085	0.176742	0.999994	-1.07028	NO	NO	NO	NO
dd_Smed_v6_10290_0_1	334	399	274	404	318	384	339.221	370.313	336.538	420.994	297.221	327.601	348.648	-0.00265798	0.182239	-0.0145852	0.988363	0.999994	-1.00184	NO	NO	NO	NO
dd_Smed_v6_102900_0_1	0	0	0	0	0	0	0	0	0	0	0	0	0	#N/A	N/A	N/A	N/A	N/A	#N/A	#N/A	#N/A	#N/A	#N/A
dd_Smed_v6_10291_0_1	303	349	287	294	321	358	307.737	323.908	352.505	306.367	300.025	305.42	315.993	-0.108063	0.12485	-0.865543	0.386741	0.999994	-1.07778	NO	NO	NO	NO
dd_Smed_v6_10292_0_1	328	356	279	334	431	451	333.127	330.404	342.679	348.05	402.837	384.761	356.976	0.176515	0.122647	1.43921	0.150091	0.999994	1.13015	NO	NO	NO	NO
dd_Smed_v6_102925_0_1	0	2	0	1	1	0	0	1.8562	0	1.04206	0.934656	0	0.638821	0.0415127	3.3367	0.0124412	0.990074	N/A	1.02919	NO	NO	NO	NO
dd_Smed_v6_10293_0_1	152	173	107	143	161	197	154.376	160.562	131.422	149.015	150.48	168.066	152.32	0.0644522	0.187703	0.343373	0.731318	0.999994	1.04569	NO	NO	NO	NO
dd_Smed_v6_102931_0_1	0	0	0	0	0	0	0	0	0	0	0	0	0	#N/A	N/A	N/A	N/A	N/A	#N/A	#N/A	#N/A	#N/A	#N/A
dd_Smed_v6_102937_0_1	0	0	0	0	0	0	0	0	0	0	0	0	0	#N/A	N/A	N/A	N/A	N/A	#N/A	#N/A	#N/A	#N/A	#N/A
dd_Smed_v6_10294_0_1	518	530	413	435	620	602	526.097	491.894	507.264	453.298	579.487	513.583	511.937	0.020916	0.134073	0.156004	0.87603	0.999994	1.0146	NO	NO	NO	NO
dd_Smed_v6_10295_0_1	56	61	50	67	65	67	56.8754	56.6142	61.4121	69.8183	60.7526	57.1596	60.4387	0.101275	0.270874	0.373881	0.708493	0.999994	1.07272	NO	NO	NO	NO
dd_Smed_v6_10296_0_1	20	10	12	12	11	8	20.3126	9.28102	14.7389	12.5048	10.2812	6.82502	12.3239	-0.586582	0.672863	-0.87177	0.383334	0.999994	-1.50169	-1.50169	NO	NO	NO
dd_Smed_v6_10296_0_2	20	33	21	31	40	28	20.3126	30.6274	25.7931	32.304	37.3862	23.8876	28.3852	0.281533	0.440593	0.638987	0.522831	0.999994	1.21549	NO	NO	NO	NO
dd_Smed_v6_102968_0_1	0	0	0	0	0	0	0	0	0	0	0	0	0	#N/A	N/A	N/A	N/A	N/A	#N/A	#N/A	#N/A	#N/A	#N/A
dd_Smed_v6_102975_0_1	1	0	0	0	0	0	1.01563	0	0	0	0	0	0.169272	-3.30343	4.791	-0.689508	0.490504	N/A	-9.8726	-9.8726	NO	NO	NO
dd_Smed_v6_102989_0_1	0	2	0	0	0	0	0	1.8562	0	0	0	0	0.309367	-4.18616	4.68779	-0.892993	0.371861	N/A	-18.2037	-18.2037	NO	NO	NO
dd_Smed_v6_10299_0_1	26	34	35	31	37	40	26.4064	31.5555	42.9885	32.304	34.5823	34.1251	33.6603	0.00975023	0.388572	0.0250925	0.979981	0.999994	1.00678	NO	NO	NO	NO
dd_Smed_v6_103_0_1	112	138	82	101	92	86	113.751	128.078	100.716	105.249	85.9884	73.369	101.192	-0.379373	0.259569	-1.46155	0.143864	0.999994	-1.30078	NO	NO	NO	NO
dd_Smed_v6_1030_0_1	591	696	520	570	565	644	600.239	645.959	638.686	593.977	528.081	549.414	592.726	-0.174228	0.100367	-1.73591	0.0825798	0.999994	-1.12836	NO	NO	NO	NO
dd_Smed_v6_10301_0_1	115	133	92	108	117	128	116.798	123.438	112.998	112.543	109.355	109.2	114.055	-0.0958004	0.191153	-0.50117	0.616251	0.999994	-1.06866	NO	NO	NO	NO
dd_Smed_v6_103011_0_1	2	0	1	1	0	0	2.03126	0	1.22824	1.04206	0	0	0.716928	-1.6874	3.24957	-0.519269	0.603573	N/A	-3.22076	-3.22076	NO	NO	NO
dd_Smed_v6_10302_0_1	588	655	514	610	679	756	597.192	607.907	631.316	635.659	634.631	644.965	625.278	0.0618936	0.0843988	0.733347	0.463347	0.999994	1.04383	NO	NO	NO	NO
dd_Smed_v6_103038_0_1	0	0	0	0	0	0	0	0	0	0	0	0	0	#N/A	N/A	N/A	N/A	N/A	#N/A	#N/A	#N/A	#N/A	#N/A
dd_Smed_v6_10304_0_1	595	632	445	584	659	775	604.301	586.56	546.568	608.566	615.938	661.174	603.851	0.117507	0.0981945	1.19667	0.231434	0.999994	1.08486	NO	NO	NO	NO
dd_Smed_v6_103045_0_1	0	0	0	0	0	0	0	0	0	0	0	0	0	#N/A	N/A	N/A	N/A	N/A	#N/A	#N/A	#N/A	#N/A	#N/A
dd_Smed_v6_10305_0_1	21	44	6	31	27	38	21.3283	40.8365	7.36945	32.304	25.2357	32.4189	26.5821	0.359342	0.69618	0.516163	0.60574	0.999994	1.28284	NO	NO	NO	NO
dd_Smed_v6_10305_0_2	0	0	3	0	0	0	0	0	3.68473	0	0	0	0.614121	-5.13146	4.62785	-1.10882	0.267507	N/A	-35.0529	-35.0529	NO	NO	NO
dd_Smed_v6_103057_0_1	0	1	0	2	0	0	0	0.928102	0	2.08413	0	0	0.502039	1.10543	4.13778	0.267154	0.78935	N/A	2.15162	NO	NO	2.15162	NO
dd_Smed_v6_10306_0_1	305	348	174	554	313	190	309.768	322.979	213.714	577.304	292.547	162.094	313.068	0.284097	0.463507	0.61293	0.539923	0.999994	1.21765	NO	NO	NO	NO
dd_Smed_v6_103063_0_1	0	1	1	0	0	0	0	0.928102	1.22824	0	0	0	0.359391	-4.37004	4.67295	-0.93518	0.349696	N/A	-20.6783	-20.6783	NO	NO	NO
dd_Smed_v6_103064_0_1	0	0	0	1	0	2	0	0	0	1.04206	0	1.70626	0.458053	4.57028	4.6395	0.98508	0.324585	N/A	23.757	NO	NO	23.757	NO
dd_Smed_v6_10308_0_1	400	422	307	379	425	471	406.253	391.659	377.07	394.943	397.229	401.823	394.829	0.0222689	0.10567	0.21074	0.83309	0.999994	1.01556	NO	NO	NO	NO
dd_Smed_v6_10309_0_1	78	89	75	92	93	100	79.2193	82.6011	92.1181	95.8699	86.923	85.3128	87.0074	0.0796506	0.226945	0.35097	0.725611	0.999994	1.05676	NO	NO	NO	NO
dd_Smed_v6_1031_0_1	4277	4477	3499	4248	4581	4975	4343.86	4155.11	4297.62	4426.69	4281.66	4244.31	4291.54	0.0174711	0.0433685	0.402852	0.687057	0.999994	1.01218	NO	NO	NO	NO
dd_Smed_v6_10310_0_1	238	330	263	221	297	296	241.72	306.274	323.028	230.296	277.593	252.526	271.906	-0.193937	0.184314	-1.05221	0.292704	0.999994	-1.14388	NO	NO	NO	NO
dd_Smed_v6_10310_0_2	208	77	103	152	201	276	211.251	71.4638	126.509	158.394	187.866	235.463	165.158	0.508814	0.434098	1.17212	0.24115	0.999994	1.42288	NO	NO	1.42288	NO
dd_Smed_v6_103108_0_1	1	0	0	0	0	0	1.01563	0	0	0	0	0	0.169272	-3.30343	4.791	-0.689508	0.490504	N/A	-9.8726	-9.8726	NO	NO	NO
dd_Smed_v6_10311_0_1	139	167	55	152	93	27	141.173	154.993	67.5533	158.394	86.923	23.0345	105.345	-0.442241	0.697093	-0.634407	0.525815	0.999994	-1.35871	NO	NO	NO	NO
dd_Smed_v6_10311_0_2	136	153	117	238	218	177	138.126	142	143.704	248.011	203.755	151.004	171.1	0.505855	0.249927	2.02401	0.0429691	0.805728	1.41996	NO	NO	1.41996	NO
dd_Smed_v6_103115_0_1	0	0	0	0	0	0	0	0	0	0	0	0	0	#N/A	N/A	N/A	N/A	N/A	#N/A	#N/A	#N/A	#N/A	#N/A
dd_Smed_v6_10312_0_1	148	134	114	138	153	155	150.314	124.366	140.02	143.805	143.002	132.235	138.957	0.0155803	0.188604	0.0826086	0.934163	0.999994	1.01086	NO	NO	NO	NO
dd_Smed_v6_103126_0_1	0	0	0	0	0	0	0	0	0	0	0	0	0	#N/A	N/A	N/A	N/A	N/A	#N/A	#N/A	#N/A	#N/A	#N/A
dd_Smed_v6_10313_0_1	183	201	172	192	213	203	185.861	186.548	211.258	200.076	199.082	173.185	192.668	-0.0272888	0.1672	-0.16321	0.870353	0.999994	-1.0191	NO	NO	NO	NO
dd_Smed_v6_103137_0_1	0	1	0	0	0	0	0	0.928102	0	0	0	0	0.154684	-3.20437	4.80681	-0.666631	0.505008	N/A	-9.21747	-9.21747	NO	NO	NO
dd_Smed_v6_10314_0_1	468	542	329	490	602	661	475.316	503.031	404.092	510.612	562.663	563.918	503.272	0.241951	0.131983	1.8332	0.0667728	0.920055	1.18259	NO	NO	NO	NO
dd_Smed_v6_103141_0_1	0	1	0	2	0	0	0	0.928102	0	2.08413	0	0	0.502039	1.10543	4.13778	0.267154	0.78935	N/A	2.15162	NO	NO	2.15162	NO
dd_Smed_v6_103146_0_1	0	0	1	0	0	0	0	0	1.22824	0	0	0	0.204707	-3.51601	4.76036	-0.738603	0.460148	N/A	-11.44	-11.44	NO	NO	NO
dd_Smed_v6_103149_0_1	0	1	0	1	0	0	0	0.928102	0	1.04206	0	0	0.328361	0.0907951	4.25355	0.0213457	0.98297	N/A	1.06496	NO	NO	NO	NO
dd_Smed_v6_10315_0_1	393	339	306	361	435	245	399.143	314.626	375.842	376.185	406.575	209.016	346.898	-0.136385	0.290271	-0.469855	0.638459	0.999994	-1.09915	NO	NO	NO	NO
dd_Smed_v6_10315_0_2	277	393	224	338	425	489	281.33	364.744	275.126	352.218	397.229	417.18	347.971	0.339041	0.176788	1.91778	0.055139	0.86717	1.26492	NO	NO	NO	NO
dd_Smed_v6_103150_0_1	0	0	0	0	0	0	0	0	0	0	0	0	0	#N/A	N/A	N/A	N/A	N/A	#N/A	#N/A	#N/A	#N/A	#N/A
dd_Smed_v6_10316_0_1	115	104	108	112	133	140	116.798	96.5226	132.65	116.711	124.309	119.438	117.738	0.0648129	0.221312	0.292857	0.769631	0.999994	1.04595	NO	NO	NO	NO
dd_Smed_v6_103174_0_1	0	0	0	0	0	0	0	0	0	0	0	0	0	#N/A	N/A	N/A	N/A	N/A	#N/A	#N/A	#N/A	#N/A	#N/A
dd_Smed_v6_103177_0_1	0	0	0	0	0	2	0	0	0	0	0	1.70626	0.284376	3.89923	4.68472	0.832329	0.405223	N/A	14.9206	NO	NO	14.9206	NO
dd_Smed_v6_10318_0_1	229	276	234	244	291	352	232.58	256.156	287.409	254.264	271.985	300.301	267.116	0.0945856	0.161238	0.58662	0.557459	0.999994	1.06776	NO	NO	NO	NO
dd_Smed_v6_10319_0_1	568	601	467	536	619	679	576.879	557.789	573.589	558.547	578.552	579.274	570.772	0.00788682	0.0877128	0.0899163	0.928354	0.999994	1.00548	NO	NO	NO	NO
dd_Smed_v6_1032_0_1	6050	6980	4940	5604	6382	8105	6144.57	6478.15	6067.51	5839.73	5964.97	6914.6	6234.92	0.00235026	0.0814546	0.0288537	0.976981	0.999994	1.00163	NO	NO	NO	NO
dd_Smed_v6_10320_0_1	224	244	166	178	278	273	227.502	226.457	203.888	185.488	259.834	232.904	222.679	0.0443166	0.194289	0.228096	0.819571	0.999994	1.03119	NO	NO	NO	NO
dd_Smed_v6_103200_0_1	1	1	0	0	0	3	1.01563	0.928102	0	0	0	2.55938	0.75052	0.394628	3.26189	0.120982	0.903706	N/A	1.3146	NO	NO	NO	NO
dd_Smed_v6_103216_0_1	0	0	2	0	0	0	0	0	2.45648	0	0	0	0.409414	-4.5381	4.6609	-0.973652	0.330229	N/A	-23.2329	-23.2329	NO	NO	NO
dd_Smed_v6_10322_0_1	523	552	441	528	668	721	531.176	512.312	541.655	550.21	624.35	615.105	562.468	0.177137	0.103692	1.70829	0.0875817	0.999994	1.13064	NO	NO	NO	NO
dd_Smed_v6_10323_0_1	216	208	184	157	194	207	219.377	193.045	225.996	163.604	181.323	176.597	193.324	-0.288172	0.163342	-1.76423	0.0776933	0.982073	-1.22109	NO	NO	NO	NO
dd_Smed_v6_10323_0_2	86	94	69	82	78	121	87.3444	87.2416	84.7487	85.4493	72.9032	103.228	86.8193	0.0139539	0.254985	0.0547244	0.956358	0.999994	1.00972	NO	NO	NO	NO
dd_Smed_v6_103231_0_1	0	0	0	0	0	0	0	0	0	0	0	0	0	#N/A	N/A	N/A	N/A	N/A	#N/A	#N/A	#N/A	#N/A	#N/A
dd_Smed_v6_10324_0_1	125	158	126	126	149	178	126.954	146.64	154.758	131.3	139.264	151.857	141.796	-0.0165426	0.193312	-0.0855746	0.931805	0.999994	-1.01153	NO	NO	NO	NO
dd_Smed_v6_103241_0_1	2	1	0	1	2	0	2.03126	0.928102	0	1.04206	1.86931	0	0.978457	-0.0580955	2.37902	-0.0244199	0.980518	N/A	-1.04109	NO	NO	NO	NO
dd_Smed_v6_103248_0_1	0	0	0	0	0	0	0	0	0	0	0	0	0	#N/A	N/A	N/A	N/A	N/A	#N/A	#N/A	#N/A	#N/A	#N/A
dd_Smed_v6_103249_0_1	4	1	1	0	1	1	4.06253	0.928102	1.22824	0	0.934656	0.853128	1.33444	-1.76852	1.94376	-0.909843	0.362905	N/A	-3.40705	-3.40705	NO	NO	NO
dd_Smed_v6_10325_0_1	207	211	190	224	275	296	210.236	195.829	233.366	233.422	257.03	252.526	230.402	0.220926	0.153181	1.44225	0.149231	0.999994	1.16548	NO	NO	NO	NO
dd_Smed_v6_103257_0_1	1	0	0	0	0	0	1.01563	0	0	0	0	0	0.169272	-3.30343	4.791	-0.689508	0.490504	N/A	-9.8726	-9.8726	NO	NO	NO
dd_Smed_v6_10326_0_1	2	8	10	4	10	6	2.03126	7.42481	12.2824	4.16826	9.34656	5.11877	6.72868	-0.206925	0.999813	-0.206963	0.836038	0.999994	-1.15423	NO	NO	NO	NO
dd_Smed_v6_10326_0_2	77	82	73	73	71	95	78.2037	76.1043	89.6617	76.0707	66.3606	81.0471	77.908	-0.122231	0.248213	-0.492444	0.622405	0.999994	-1.08842	NO	NO	NO	NO
dd_Smed_v6_103260_0_1	0	0	1	0	0	0	0	0	1.22824	0	0	0	0.204707	-3.51601	4.76036	-0.738603	0.460148	N/A	-11.44	-11.44	NO	NO	NO
dd_Smed_v6_103268_0_1	0	0	0	0	0	0	0	0	0	0	0	0	0	#N/A	N/A	N/A	N/A	N/A	#N/A	#N/A	#N/A	#N/A	#N/A
dd_Smed_v6_10327_0_1	100	86	84	64	70	111	101.563	79.8167	103.172	66.6921	65.4259	94.6972	85.2279	-0.321111	0.293607	-1.09368	0.274097	0.999994	-1.24929	NO	NO	NO	NO
dd_Smed_v6_10327_0_2	0	0	0	0	0	0	0	0	0	0	0	0	0	#N/A	N/A	N/A	N/A	N/A	#N/A	#N/A	#N/A	#N/A	#N/A
dd_Smed_v6_10327_0_3	1	0	1	0	2	1	1.01563	0	1.22824	0	1.86931	0.853128	0.827719	0.323226	2.48045	0.13031	0.896321	N/A	1.25113	NO	NO	NO	NO
dd_Smed_v6_103273_0_1	2	1	2	0	0	0	2.03126	0.928102	2.45648	0	0	0	0.902642	-5.69662	3.36593	-1.69244	0.0905628	N/A	-51.8624	-51.8624	NO	NO	NO
dd_Smed_v6_10328_0_1	7	3	4	3	6	0	7.10942	2.78431	4.91297	3.12619	5.60794	0	3.92347	-0.76894	1.41821	-0.542191	0.587687	N/A	-1.70402	-1.70402	NO	NO	NO
dd_Smed_v6_10328_0_3	2	2	5	0	4	3	2.03126	1.8562	6.14121	0	3.73862	2.55938	2.72111	-0.636106	1.53256	-0.415062	0.678097	N/A	-1.55413	-1.55413	NO	NO	NO
dd_Smed_v6_103283_0_1	0	0	0	0	0	0	0	0	0	0	0	0	0	#N/A	N/A	N/A	N/A	N/A	#N/A	#N/A	#N/A	#N/A	#N/A
dd_Smed_v6_10329_0_1	149	173	115	125	153	200	151.329	160.562	141.248	130.258	143.002	170.626	149.504	-0.0289862	0.20237	-0.143234	0.886106	0.999994	-1.02029	NO	NO	NO	NO
dd_Smed_v6_1033_0_1	1722	1866	1348	1671	1837	2102	1748.92	1731.84	1655.67	1741.29	1716.96	1793.27	1731.33	0.031379	0.0580985	0.540101	0.589128	0.999994	1.02199	NO	NO	NO	NO
dd_Smed_v6_10330_0_1	538	583	401	537	569	591	546.41	541.083	492.525	559.589	531.819	504.199	529.271	0.0113088	0.106344	0.106342	0.915311	0.999994	1.00787	NO	NO	NO	NO
dd_Smed_v6_103303_0_1	1	0	2	0	0	0	1.01563	0	2.45648	0	0	0	0.578686	-5.05174	4.60837	-1.09621	0.272987	N/A	-33.1684	-33.1684	NO	NO	NO
dd_Smed_v6_103306_0_1	0	0	0	0	0	0	0	0	0	0	0	0	0	#N/A	N/A	N/A	N/A	N/A	#N/A	#N/A	#N/A	#N/A	#N/A
dd_Smed_v6_10331_0_1	37	56	41	65	53	60	37.5784	51.9737	50.3579	67.7342	49.5368	51.1877	51.3948	0.265448	0.336399	0.789088	0.430061	0.999994	1.20201	NO	NO	NO	NO
dd_Smed_v6_10331_0_2	22	20	11	19	22	14	22.3439	18.562	13.5107	19.7992	20.5624	11.9438	17.787	-0.0688909	0.548519	-0.125594	0.900053	0.999994	-1.04891	NO	NO	NO	NO
dd_Smed_v6_103320_0_1	0	0	0	0	0	0	0	0	0	0	0	0	0	#N/A	N/A	N/A	N/A	N/A	#N/A	#N/A	#N/A	#N/A	#N/A
dd_Smed_v6_103322_0_1	0	0	0	0	0	0	0	0	0	0	0	0	0	#N/A	N/A	N/A	N/A	N/A	#N/A	#N/A	#N/A	#N/A	#N/A
dd_Smed_v6_103327_0_1	0	0	0	0	0	0	0	0	0	0	0	0	0	#N/A	N/A	N/A	N/A	N/A	#N/A	#N/A	#N/A	#N/A	#N/A
dd_Smed_v6_10333_0_1	74	77	71	98	115	86	75.1568	71.4638	87.2052	102.122	107.485	73.369	86.1338	0.276119	0.280409	0.984698	0.324772	0.999994	1.21093	NO	NO	NO	NO
dd_Smed_v6_103336_0_1	1	0	0	0	0	1	1.01563	0	0	0	0	0.853128	0.31146	-0.230366	4.27327	-0.0539086	0.957008	N/A	-1.17313	NO	NO	NO	NO
dd_Smed_v6_10334_0_1	680	735	562	635	839	867	690.63	682.155	690.272	661.711	784.176	739.662	708.101	0.0843188	0.102519	0.822473	0.410808	0.999994	1.06019	NO	NO	NO	NO
dd_Smed_v6_103347_0_1	0	0	0	0	0	0	0	0	0	0	0	0	0	#N/A	N/A	N/A	N/A	N/A	#N/A	#N/A	#N/A	#N/A	#N/A
dd_Smed_v6_10335_0_1	333	358	278	300	360	428	338.205	332.26	341.451	312.619	336.476	365.139	337.692	0.00561614	0.125986	0.0445776	0.964444	0.999994	1.0039	NO	NO	NO	NO
dd_Smed_v6_103351_0_1	0	0	0	1	0	0	0	0	0	1.04206	0	0	0.173677	3.13559	4.76834	0.657585	0.510805	N/A	8.78834	NO	NO	8.78834	NO
dd_Smed_v6_103352_0_1	0	0	0	0	0	0	0	0	0	0	0	0	0	#N/A	N/A	N/A	N/A	N/A	#N/A	#N/A	#N/A	#N/A	#N/A
dd_Smed_v6_10336_0_1	264	225	211	263	268	247	268.127	208.823	259.159	274.063	250.488	210.723	245.23	-0.00160064	0.195071	-0.00820542	0.993453	0.999994	-1.00111	NO	NO	NO	NO
dd_Smed_v6_103368_0_1	0	0	0	0	0	0	0	0	0	0	0	0	0	#N/A	N/A	N/A	N/A	N/A	#N/A	#N/A	#N/A	#N/A	#N/A
dd_Smed_v6_103369_0_1	0	0	0	0	0	0	0	0	0	0	0	0	0	#N/A	N/A	N/A	N/A	N/A	#N/A	#N/A	#N/A	#N/A	#N/A
dd_Smed_v6_10337_0_1	10	58	0	0	49	0	10.1563	53.8299	0	0	45.7981	0	18.2974	-0.483869	2.61789	-0.184832	0.853361	0.999994	-1.39849	NO	NO	NO	NO
dd_Smed_v6_10337_0_10	0	0	0	0	25	0	0	0	0	0	23.3664	0	3.8944	7.65551	4.57126	1.6747	0.0939923	N/A	201.623	NO	NO	201.623	NO
dd_Smed_v6_10337_0_11	1	0	15	25	31	0	1.01563	0	18.4236	26.0516	28.9743	0	12.4109	1.51103	2.11371	0.71487	0.474689	0.999994	2.85013	NO	NO	2.85013	NO
dd_Smed_v6_10337_0_12	9	33	0	0	0	4	9.14069	30.6274	0	0	0	3.41251	7.19676	-3.52035	2.3575	-1.49325	0.135371	0.999994	-11.4744	-11.4744	NO	NO	NO
dd_Smed_v6_10337_0_13	218	268	185	202	229	260	221.408	248.731	227.225	210.497	214.036	221.813	223.952	-0.110386	0.144131	-0.765872	0.443752	0.999994	-1.07952	NO	NO	NO	NO
dd_Smed_v6_10337_0_15	0	0	0	0	0	0	0	0	0	0	0	0	0	#N/A	N/A	N/A	N/A	N/A	#N/A	#N/A	#N/A	#N/A	#N/A
dd_Smed_v6_10337_0_2	0	0	0	0	0	0	0	0	0	0	0	0	0	#N/A	N/A	N/A	N/A	N/A	#N/A	#N/A	#N/A	#N/A	#N/A
dd_Smed_v6_10337_0_3	0	0	31	29	0	67	0	0	38.0755	30.2199	0	57.1596	20.9092	1.20286	2.54139	0.473309	0.635993	0.999994	2.30196	NO	NO	2.30196	NO
dd_Smed_v6_10337_0_4	0	0	0	0	30	18	0	0	0	0	28.0397	15.3563	7.23266	8.54978	3.33968	2.56006	0.0104655	0.377561	374.75	NO	NO	374.75	NO
dd_Smed_v6_10337_0_5	58	0	16	47	0	0	58.9067	0	19.6519	48.977	0	0	21.2559	-0.683294	2.60572	-0.262228	0.793145	0.999994	-1.6058	-1.6058	NO	NO	NO
dd_Smed_v6_10337_0_6	0	0	0	0	0	45	0	0	0	0	0	38.3908	6.39846	8.37283	4.38212	1.91068	0.0560457	0.873899	331.491	NO	NO	331.491	NO
dd_Smed_v6_10337_0_7	20	5	0	0	0	0	20.3126	4.64051	0	0	0	0	4.15886	-7.91237	3.48907	-2.26776	0.0233437	N/A	-240.914	-240.914	NO	NO	NO
dd_Smed_v6_10337_0_8	0	0	0	0	12	9	0	0	0	0	11.2159	7.67815	3.149	7.35135	3.5086	2.09524	0.0361501	N/A	163.297	NO	NO	163.297	NO
dd_Smed_v6_10337_0_9	88	165	95	131	101	120	89.3756	153.137	116.683	136.51	94.4003	102.375	115.414	-0.111537	0.316416	-0.352502	0.724461	0.999994	-1.08038	NO	NO	NO	NO
dd_Smed_v6_10338_0_1	270	297	214	242	312	295	274.221	275.646	262.844	252.18	291.613	251.673	268.029	-0.0317722	0.141207	-0.225005	0.821975	0.999994	-1.02227	NO	NO	NO	NO
dd_Smed_v6_10338_0_2	41	51	34	20	47	52	41.6409	47.3332	41.7602	20.8413	43.9288	44.3626	39.9779	-0.255941	0.440423	-0.581124	0.561157	0.999994	-1.19411	NO	NO	NO	NO
dd_Smed_v6_10339_0_1	247	251	206	224	266	304	250.861	232.954	253.018	233.422	248.619	259.351	246.371	0.0118248	0.138908	0.0851267	0.932161	0.999994	1.00823	NO	NO	NO	NO
dd_Smed_v6_103390_0_1	0	0	0	0	0	0	0	0	0	0	0	0	0	#N/A	N/A	N/A	N/A	N/A	#N/A	#N/A	#N/A	#N/A	#N/A
dd_Smed_v6_103395_0_1	1	0	0	0	0	0	1.01563	0	0	0	0	0	0.169272	-3.30343	4.791	-0.689508	0.490504	N/A	-9.8726	-9.8726	NO	NO	NO
dd_Smed_v6_103398_0_1	0	0	0	0	0	0	0	0	0	0	0	0	0	#N/A	N/A	N/A	N/A	N/A	#N/A	#N/A	#N/A	#N/A	#N/A
dd_Smed_v6_1034_0_1	4200	4537	3395	4177	4820	5468	4265.65	4210.8	4169.88	4352.7	4505.04	4664.9	4361.5	0.0969668	0.0456915	2.12221	0.0338205	0.728665	1.06952	NO	NO	NO	NO
dd_Smed_v6_10340_0_1	435	449	317	388	521	536	441.8	416.718	389.353	404.321	486.956	457.277	432.737	0.111774	0.131302	0.851277	0.394615	0.999994	1.08056	NO	NO	NO	NO
dd_Smed_v6_10341_0_1	103	107	89	99	143	137	104.61	99.3069	109.314	103.164	133.656	116.879	111.155	0.178657	0.218101	0.819148	0.412702	0.999994	1.13183	NO	NO	NO	NO
dd_Smed_v6_103411_0_1	0	0	0	0	0	0	0	0	0	0	0	0	0	#N/A	N/A	N/A	N/A	N/A	#N/A	#N/A	#N/A	#N/A	#N/A
dd_Smed_v6_10342_0_1	189	143	140	195	176	205	191.954	132.719	171.954	203.203	164.499	174.891	173.203	0.128558	0.226574	0.5674	0.570442	0.999994	1.0932	NO	NO	NO	NO
dd_Smed_v6_10342_0_2	40	79	53	0	68	42	40.6253	73.32	65.0968	0	63.5566	35.8314	46.405	-0.847654	1.23128	-0.688431	0.491181	0.999994	-1.79957	-1.79957	NO	NO	NO
dd_Smed_v6_10342_0_3	0	0	0	0	0	0	0	0	0	0	0	0	0	#N/A	N/A	N/A	N/A	N/A	#N/A	#N/A	#N/A	#N/A	#N/A
dd_Smed_v6_10342_0_4	0	0	0	0	0	0	0	0	0	0	0	0	0	#N/A	N/A	N/A	N/A	N/A	#N/A	#N/A	#N/A	#N/A	#N/A
dd_Smed_v6_103422_0_1	0	0	0	0	0	0	0	0	0	0	0	0	0	#N/A	N/A	N/A	N/A	N/A	#N/A	#N/A	#N/A	#N/A	#N/A
dd_Smed_v6_103425_0_1	0	0	0	0	1	0	0	0	0	0	0.934656	0	0.155776	3.01414	4.78601	0.62978	0.528838	N/A	8.07877	NO	NO	8.07877	NO
dd_Smed_v6_10343_0_1	574	616	408	550	544	661	582.973	571.711	501.123	573.136	508.453	563.918	550.219	-0.0111293	0.118122	-0.094218	0.924936	0.999994	-1.00774	NO	NO	NO	NO
dd_Smed_v6_103440_0_1	0	0	0	0	0	0	0	0	0	0	0	0	0	#N/A	N/A	N/A	N/A	N/A	#N/A	#N/A	#N/A	#N/A	#N/A
dd_Smed_v6_103451_0_1	1	0	0	0	0	0	1.01563	0	0	0	0	0	0.169272	-3.30343	4.791	-0.689508	0.490504	N/A	-9.8726	-9.8726	NO	NO	NO
dd_Smed_v6_103453_0_1	0	0	0	0	0	0	0	0	0	0	0	0	0	#N/A	N/A	N/A	N/A	N/A	#N/A	#N/A	#N/A	#N/A	#N/A
dd_Smed_v6_103458_0_1	0	0	0	1	0	1	0	0	0	1.04206	0	0.853128	0.315865	4.02876	4.67433	0.861891	0.388748	N/A	16.3221	NO	NO	16.3221	NO
dd_Smed_v6_10346_0_1	281	323	295	297	343	367	285.393	299.777	362.331	309.493	320.587	313.098	315.113	-0.00319375	0.149852	-0.0213127	0.982996	0.999994	-1.00222	NO	NO	NO	NO
dd_Smed_v6_103463_0_1	0	1	0	2	0	0	0	0.928102	0	2.08413	0	0	0.502039	1.10543	4.13778	0.267154	0.78935	N/A	2.15162	NO	NO	2.15162	NO
dd_Smed_v6_10347_0_1	444	564	394	414	564	608	450.941	523.449	483.927	431.415	527.146	518.702	489.263	0.0193159	0.138544	0.139421	0.889118	0.999994	1.01348	NO	NO	NO	NO
dd_Smed_v6_103474_0_1	0	0	0	0	1	1	0	0	0	0	0.934656	0.853128	0.297964	3.95702	4.67997	0.845521	0.39782	N/A	15.5303	NO	NO	15.5303	NO
dd_Smed_v6_10348_0_1	292	278	239	264	328	358	296.565	258.012	293.55	275.105	306.567	305.42	289.203	0.0678292	0.140721	0.482013	0.629797	0.999994	1.04814	NO	NO	NO	NO
dd_Smed_v6_10349_0_1	160	193	153	153	188	202	162.501	179.124	187.921	159.436	175.715	172.332	172.838	-0.0587107	0.166804	-0.351975	0.724857	0.999994	-1.04153	NO	NO	NO	NO
dd_Smed_v6_1035_1_1	305	451	251	347	331	421	309.768	418.574	308.289	361.596	309.371	359.167	344.461	-0.0114135	0.188123	-0.0606703	0.951622	0.999994	-1.00794	NO	NO	NO	NO
dd_Smed_v6_1035_1_2	3236	3559	2373	2991	3033	3772	3286.59	3303.11	2914.62	3116.82	2834.81	3218	3112.32	-0.0522609	0.0843504	-0.619569	0.535541	0.999994	-1.03689	NO	NO	NO	NO
dd_Smed_v6_10350_0_1	176	195	172	161	223	204	178.751	180.98	211.258	167.772	208.428	174.038	186.871	-0.050199	0.187055	-0.268364	0.788419	0.999994	-1.03541	NO	NO	NO	NO
dd_Smed_v6_103509_0_1	0	0	0	0	0	0	0	0	0	0	0	0	0	#N/A	N/A	N/A	N/A	N/A	#N/A	#N/A	#N/A	#N/A	#N/A
dd_Smed_v6_10351_0_1	90	95	98	98	90	137	91.4069	88.1697	120.368	102.122	84.119	116.879	100.511	0.0210455	0.271216	0.0775966	0.938149	0.999994	1.01469	NO	NO	NO	NO
dd_Smed_v6_10352_0_1	78	91	102	128	95	108	79.2193	84.4573	125.281	133.384	88.7923	92.1378	100.545	0.123728	0.328099	0.377106	0.706095	0.999994	1.08955	NO	NO	NO	NO
dd_Smed_v6_10352_0_2	210	267	163	207	257	263	213.283	247.803	200.203	215.707	240.207	224.373	223.596	0.0380119	0.164422	0.231185	0.817171	0.999994	1.0267	NO	NO	NO	NO
dd_Smed_v6_103522_0_1	0	0	1	0	0	0	0	0	1.22824	0	0	0	0.204707	-3.51601	4.76036	-0.738603	0.460148	N/A	-11.44	-11.44	NO	NO	NO
dd_Smed_v6_103526_0_1	0	0	0	0	0	0	0	0	0	0	0	0	0	#N/A	N/A	N/A	N/A	N/A	#N/A	#N/A	#N/A	#N/A	#N/A
dd_Smed_v6_10354_0_1	319	282	249	253	312	337	323.987	261.725	305.832	263.642	291.613	287.504	289.05	-0.0786918	0.152186	-0.517077	0.605103	0.999994	-1.05606	NO	NO	NO	NO
dd_Smed_v6_10355_0_1	353	403	309	373	425	486	358.518	374.025	379.527	388.69	397.229	414.62	385.435	0.111912	0.108535	1.03111	0.302487	0.999994	1.08066	NO	NO	NO	NO
dd_Smed_v6_10356_0_1	319	322	227	299	341	410	323.987	298.849	278.811	311.577	318.718	349.782	313.621	0.119867	0.136246	0.879784	0.378976	0.999994	1.08664	NO	NO	NO	NO
dd_Smed_v6_10357_0_1	321	333	275	312	386	433	326.018	309.058	337.767	325.124	360.777	369.404	338.025	0.120474	0.12639	0.953191	0.340493	0.999994	1.08709	NO	NO	NO	NO
dd_Smed_v6_103576_0_1	0	1	2	1	0	0	0	0.928102	2.45648	1.04206	0	0	0.737775	-1.73255	3.24146	-0.534498	0.592997	N/A	-3.32316	-3.32316	NO	NO	NO
dd_Smed_v6_103582_0_1	1	1	0	0	1	2	1.01563	0.928102	0	0	0.934656	1.70626	0.764108	0.428677	2.48761	0.172325	0.863182	N/A	1.346	NO	NO	NO	NO
dd_Smed_v6_103583_0_1	0	1	0	0	1	0	0	0.928102	0	0	0.934656	0	0.31046	-0.0306605	4.27335	-0.00717482	0.994275	N/A	-1.02148	NO	NO	NO	NO
dd_Smed_v6_10359_0_1	364	431	335	348	446	488	369.69	400.012	411.461	362.639	416.857	416.326	396.164	0.0200276	0.126105	0.158818	0.873813	0.999994	1.01398	NO	NO	NO	NO
dd_Smed_v6_1036_0_1	2001	2091	1676	1708	1882	2363	2032.28	1940.66	2058.53	1779.85	1759.02	2015.94	1931.05	-0.117744	0.081372	-1.44698	0.147901	0.999994	-1.08504	NO	NO	NO	NO
dd_Smed_v6_10360_0_1	188	208	144	151	216	234	190.939	193.045	176.867	157.352	201.886	199.632	186.62	-0.00420028	0.185083	-0.022694	0.981894	0.999994	-1.00292	NO	NO	NO	NO
dd_Smed_v6_10361_0_1	224	299	202	235	214	297	227.502	277.502	248.105	244.885	200.016	253.379	241.898	-0.109856	0.180514	-0.608574	0.542807	0.999994	-1.07912	NO	NO	NO	NO
dd_Smed_v6_10362_1_1	163	201	136	132	168	238	165.548	186.548	167.041	137.553	157.022	203.044	169.459	-0.0592418	0.22558	-0.26262	0.792843	0.999994	-1.04192	NO	NO	NO	NO
dd_Smed_v6_10362_1_2	60	61	57	67	37	68	60.9379	56.6142	70.0098	69.8183	34.5823	58.0127	58.3292	-0.207321	0.381747	-0.543086	0.587071	0.999994	-1.15454	NO	NO	NO	NO
dd_Smed_v6_10363_0_1	35	42	27	46	58	49	35.5471	38.9803	33.1625	47.935	54.2101	41.8033	41.9397	0.413514	0.331825	1.24618	0.212697	0.999994	1.33193	NO	NO	NO	NO
dd_Smed_v6_10364_0_1	205	204	165	218	192	225	208.205	189.333	202.66	227.17	179.454	191.954	199.796	-0.00504992	0.174973	-0.0288611	0.976975	0.999994	-1.00351	NO	NO	NO	NO
dd_Smed_v6_103646_0_1	0	0	3	0	0	0	0	0	3.68473	0	0	0	0.614121	-5.13146	4.62785	-1.10882	0.267507	N/A	-35.0529	-35.0529	NO	NO	NO
dd_Smed_v6_10365_0_1	220	264	190	176	198	257	223.439	245.019	233.366	183.403	185.062	219.254	214.924	-0.254376	0.16241	-1.56626	0.117289	0.999994	-1.19282	NO	NO	NO	NO
dd_Smed_v6_103657_0_1	0	0	0	0	1	2	0	0	0	0	0.934656	1.70626	0.440152	4.51908	4.64228	0.973462	0.330324	N/A	22.9286	NO	NO	22.9286	NO
dd_Smed_v6_10366_0_1	197	194	164	165	216	222	200.08	180.052	201.432	171.941	201.886	189.394	190.797	-0.0431527	0.164951	-0.261609	0.793623	0.999994	-1.03036	NO	NO	NO	NO
dd_Smed_v6_10368_0_1	51	62	39	34	49	54	51.7972	57.5423	47.9014	35.4302	45.7981	46.0689	47.423	-0.304433	0.317009	-0.960329	0.33689	0.999994	-1.23493	NO	NO	NO	NO
dd_Smed_v6_10369_0_1	154	158	66	293	164	57	156.407	146.64	81.064	305.325	153.284	48.6283	148.558	0.398628	0.644937	0.618089	0.536517	0.999994	1.31825	NO	NO	NO	NO
dd_Smed_v6_10369_0_2	346	415	235	561	363	284	351.409	385.162	288.637	584.598	339.28	242.288	365.229	0.183939	0.347652	0.529089	0.596744	0.999994	1.13598	NO	NO	NO	NO
dd_Smed_v6_103690_0_1	0	0	0	0	0	0	0	0	0	0	0	0	0	#N/A	N/A	N/A	N/A	N/A	#N/A	#N/A	#N/A	#N/A	#N/A
dd_Smed_v6_1037_0_1	3338	3683	2724	2974	3617	4518	3390.18	3418.2	3345.73	3099.1	3380.65	3854.43	3414.72	0.0257469	0.0928079	0.277421	0.781457	0.999994	1.01801	NO	NO	NO	NO
dd_Smed_v6_10370_0_1	128	141	133	146	162	160	130.001	130.862	163.356	152.141	151.414	136.5	144.046	0.0562806	0.199458	0.282168	0.777815	0.999994	1.03978	NO	NO	NO	NO
dd_Smed_v6_10370_1_1	31	20	9	16	11	18	31.4846	18.562	11.0542	16.673	10.2812	15.3563	17.2352	-0.538508	0.643416	-0.83695	0.40262	0.999994	-1.45247	-1.45247	NO	NO	NO
dd_Smed_v6_10371_0_1	92	83	60	88	91	93	93.4382	77.0324	73.6945	91.7017	85.0537	79.3409	83.3769	0.0650815	0.245215	0.265406	0.790696	0.999994	1.04614	NO	NO	NO	NO
dd_Smed_v6_103710_0_1	0	1	1	0	0	0	0	0.928102	1.22824	0	0	0	0.359391	-4.37004	4.67295	-0.93518	0.349696	N/A	-20.6783	-20.6783	NO	NO	NO
dd_Smed_v6_10372_0_1	312	367	280	292	408	437	316.877	340.613	343.908	304.283	381.34	372.817	343.306	0.0819766	0.149068	0.549926	0.58237	0.999994	1.05847	NO	NO	NO	NO
dd_Smed_v6_10373_0_1	0	0	46	0	0	81	0	0	56.4991	0	0	69.1034	20.9337	0.292833	3.37369	0.0867991	N/A	N/A	1.22504	NO	NO	NO	NO
dd_Smed_v6_10373_0_10	5	5	0	9	11	5	5.07816	4.64051	0	9.37858	10.2812	4.26564	5.60735	1.26523	1.20258	1.0521	0.292754	0.999994	2.40366	NO	NO	2.40366	NO
dd_Smed_v6_10373_0_11	0	9	4	1	8	18	0	8.35292	4.91297	1.04206	7.47725	15.3563	6.19025	0.850459	1.55829	0.545766	0.585227	0.999994	1.80307	NO	NO	1.80307	NO
dd_Smed_v6_10373_0_2	42	91	0	95	60	12	42.6565	84.4573	0	98.9961	56.0794	10.2375	48.7378	0.375764	1.40297	0.267835	0.788826	0.999994	1.29753	NO	NO	NO	NO
dd_Smed_v6_10373_0_3	0	0	0	0	0	0	0	0	0	0	0	0	0	#N/A	N/A	N/A	N/A	N/A	#N/A	#N/A	#N/A	#N/A	#N/A
dd_Smed_v6_10373_0_4	0	0	0	0	0	0	0	0	0	0	0	0	0	#N/A	N/A	N/A	N/A	N/A	#N/A	#N/A	#N/A	#N/A	#N/A
dd_Smed_v6_10373_0_5	100	117	16	85	103	0	101.563	108.588	19.6519	88.5755	96.2696	0	69.108	-0.315668	1.39137	-0.226876	0.820521	0.999994	-1.24459	NO	NO	NO	NO
dd_Smed_v6_10373_0_6	304	280	312	240	288	446	308.752	259.868	383.211	250.096	269.181	380.495	308.601	-0.0777869	0.252538	-0.308021	0.758066	0.999994	-1.0554	NO	NO	NO	NO
dd_Smed_v6_10373_0_7	24	0	0	0	8	27	24.3752	0	0	0	7.47725	23.0345	9.14781	0.324499	2.61886	0.123909	0.901388	0.999994	1.25223	NO	NO	NO	NO
dd_Smed_v6_10373_0_8	0	0	0	0	8	0	0	0	0	0	7.47725	0	1.24621	6.012	4.59073	1.30959	0.190333	N/A	64.5346	NO	NO	64.5346	NO
dd_Smed_v6_10373_0_9	0	0	0	32	0	0	0	0	0	33.3461	0	0	5.55768	8.16708	4.47296	1.82588	0.0678684	0.925736	287.433	NO	NO	287.433	NO
dd_Smed_v6_103739_0_1	0	0	1	1	0	0	0	0	1.22824	1.04206	0	0	0.378384	-0.220848	4.20098	-0.0525705	0.958074	N/A	-1.16542	NO	NO	NO	NO
dd_Smed_v6_10374_0_1	471	474	443	586	540	527	478.363	439.92	544.111	610.65	504.714	449.598	504.559	0.098029	0.170951	0.573433	0.566351	0.999994	1.07031	NO	NO	NO	NO
dd_Smed_v6_103748_0_1	0	0	0	1	0	0	0	0	0	1.04206	0	0	0.173677	3.13559	4.76834	0.657585	0.510805	N/A	8.78834	NO	NO	8.78834	NO
dd_Smed_v6_10375_0_1	226	227	176	229	254	260	229.533	210.679	216.171	238.633	237.403	221.813	225.705	0.087552	0.141747	0.617663	0.536798	0.999994	1.06257	NO	NO	NO	NO
dd_Smed_v6_103755_0_1	0	0	2	0	0	0	0	0	2.45648	0	0	0	0.409414	-4.5381	4.6609	-0.973652	0.330229	N/A	-23.2329	-23.2329	NO	NO	NO
dd_Smed_v6_10376_0_1	142	180	126	140	193	177	144.22	167.058	154.758	145.889	180.389	151.004	157.22	0.0340395	0.192195	0.177109	0.859423	0.999994	1.02387	NO	NO	NO	NO
dd_Smed_v6_10376_0_2	156	141	100	160	157	214	158.439	130.862	122.824	166.73	146.741	182.569	151.361	0.266245	0.210824	1.26287	0.206634	0.999994	1.20267	NO	NO	NO	NO
dd_Smed_v6_103761_0_1	1	0	1	0	0	0	1.01563	0	1.22824	0	0	0	0.373979	-4.42187	4.66909	-0.947053	0.343612	N/A	-21.4346	-21.4346	NO	NO	NO
dd_Smed_v6_10377_0_1	516	527	406	507	531	586	524.066	489.11	498.666	528.327	496.302	499.933	506.067	0.0113954	0.0979362	0.116355	0.907371	0.999994	1.00793	NO	NO	NO	NO
dd_Smed_v6_103770_0_1	0	0	0	0	0	0	0	0	0	0	0	0	0	#N/A	N/A	N/A	N/A	N/A	#N/A	#N/A	#N/A	#N/A	#N/A
dd_Smed_v6_103778_0_1	0	0	0	0	0	0	0	0	0	0	0	0	0	#N/A	N/A	N/A	N/A	N/A	#N/A	#N/A	#N/A	#N/A	#N/A
dd_Smed_v6_10378_0_1	238	264	205	218	355	300	241.72	245.019	251.79	227.17	331.803	255.938	258.907	0.143136	0.19856	0.720871	0.470989	0.999994	1.1043	NO	NO	NO	NO
dd_Smed_v6_103782_0_1	1	0	0	0	0	0	1.01563	0	0	0	0	0	0.169272	-3.30343	4.791	-0.689508	0.490504	N/A	-9.8726	-9.8726	NO	NO	NO
dd_Smed_v6_10379_0_1	384	394	287	372	470	422	390.003	365.672	352.505	387.648	439.288	360.02	382.523	0.0977751	0.136924	0.71408	0.475178	0.999994	1.07012	NO	NO	NO	NO
dd_Smed_v6_10379_0_2	4	0	0	4	5	5	4.06253	0	0	4.16826	4.67328	4.26564	2.86162	1.67488	1.79679	0.932148	0.35126	N/A	3.19292	NO	NO	3.19292	NO
dd_Smed_v6_103797_0_1	0	0	0	0	1	1	0	0	0	0	0.934656	0.853128	0.297964	3.95702	4.67997	0.845521	0.39782	N/A	15.5303	NO	NO	15.5303	NO
dd_Smed_v6_1038_0_1	3405	3603	2868	2961	3745	4236	3458.23	3343.95	3522.6	3085.55	3500.29	3613.85	3420.74	-0.016862	0.0780443	-0.216057	0.828943	0.999994	-1.01176	NO	NO	NO	NO
dd_Smed_v6_10380_0_1	102	99	10	129	148	106	103.594	91.8821	12.2824	134.426	138.329	90.4316	95.1577	0.801632	0.710894	1.12764	0.259472	0.999994	1.74307	NO	NO	1.74307	NO
dd_Smed_v6_10380_0_2	633	698	569	606	747	664	642.895	647.815	698.87	631.491	698.188	566.477	647.623	-0.0690888	0.120616	-0.5728	0.56678	0.999994	-1.04905	NO	NO	NO	NO
dd_Smed_v6_10381_0_1	5	4	7	2	5	5	5.07816	3.71241	8.59769	2.08413	4.67328	4.26564	4.73522	-0.630311	0.982028	-0.641846	0.520973	N/A	-1.5479	-1.5479	NO	NO	NO
dd_Smed_v6_10382_0_1	243	299	223	272	284	305	246.799	277.502	273.898	283.442	265.442	260.204	267.881	0.0187078	0.136708	0.136844	0.891154	0.999994	1.01305	NO	NO	NO	NO
dd_Smed_v6_10383_0_1	10	6	3	8	10	14	10.1563	5.56861	3.68473	8.33652	9.34656	11.9438	8.17275	0.602595	0.783712	0.768898	0.441954	0.999994	1.51844	NO	NO	1.51844	NO
dd_Smed_v6_103834_0_1	0	0	0	0	0	0	0	0	0	0	0	0	0	#N/A	N/A	N/A	N/A	N/A	#N/A	#N/A	#N/A	#N/A	#N/A
dd_Smed_v6_103850_0_1	0	0	0	1	0	0	0	0	0	1.04206	0	0	0.173677	3.13559	4.76834	0.657585	0.510805	N/A	8.78834	NO	NO	8.78834	NO
dd_Smed_v6_103855_0_1	0	0	0	0	0	0	0	0	0	0	0	0	0	#N/A	N/A	N/A	N/A	N/A	#N/A	#N/A	#N/A	#N/A	#N/A
dd_Smed_v6_103856_0_1	0	0	0	0	0	0	0	0	0	0	0	0	0	#N/A	N/A	N/A	N/A	N/A	#N/A	#N/A	#N/A	#N/A	#N/A
dd_Smed_v6_103857_0_1	0	0	0	0	0	0	0	0	0	0	0	0	0	#N/A	N/A	N/A	N/A	N/A	#N/A	#N/A	#N/A	#N/A	#N/A
dd_Smed_v6_10386_0_1	121	159	123	165	140	171	122.891	147.568	151.074	171.941	130.852	145.885	145.035	0.0893913	0.21555	0.414712	0.678353	0.999994	1.06392	NO	NO	NO	NO
dd_Smed_v6_103866_0_1	1	0	0	0	0	0	1.01563	0	0	0	0	0	0.169272	-3.30343	4.791	-0.689508	0.490504	N/A	-9.8726	-9.8726	NO	NO	NO
dd_Smed_v6_10387_0_1	371	411	352	388	439	474	376.799	381.45	432.341	404.321	410.314	404.383	401.601	0.0367488	0.116143	0.316409	0.751692	0.999994	1.0258	NO	NO	NO	NO
dd_Smed_v6_103873_0_1	0	0	0	0	0	0	0	0	0	0	0	0	0	#N/A	N/A	N/A	N/A	N/A	#N/A	#N/A	#N/A	#N/A	#N/A
dd_Smed_v6_103874_0_1	0	0	0	1	0	0	0	0	0	1.04206	0	0	0.173677	3.13559	4.76834	0.657585	0.510805	N/A	8.78834	NO	NO	8.78834	NO
dd_Smed_v6_103878_0_1	0	0	0	0	0	0	0	0	0	0	0	0	0	#N/A	N/A	N/A	N/A	N/A	#N/A	#N/A	#N/A	#N/A	#N/A
dd_Smed_v6_10388_0_1	248	237	191	233	256	283	251.877	219.96	234.594	242.801	239.272	241.435	238.323	0.0351179	0.140434	0.250068	0.802535	0.999994	1.02464	NO	NO	NO	NO
dd_Smed_v6_10389_0_1	101	109	71	75	83	108	102.579	101.163	87.2052	78.1549	77.5765	92.1378	89.8027	-0.232047	0.233918	-0.992004	0.321196	0.999994	-1.1745	NO	NO	NO	NO
dd_Smed_v6_103892_0_1	0	0	0	0	0	0	0	0	0	0	0	0	0	#N/A	N/A	N/A	N/A	N/A	#N/A	#N/A	#N/A	#N/A	#N/A
dd_Smed_v6_1039_0_1	2473	3787	3185	3396	3644	4342	2511.66	3514.72	3911.95	3538.85	3405.89	3704.28	3431.22	0.0999242	0.16266	0.614312	0.539009	0.999994	1.07172	NO	NO	NO	NO
dd_Smed_v6_10390_0_1	246	246	179	230	306	348	249.845	228.313	219.855	239.675	286.005	296.889	253.43	0.237766	0.162721	1.46119	0.143963	0.999994	1.17917	NO	NO	NO	NO
dd_Smed_v6_103900_0_1	0	0	0	0	0	0	0	0	0	0	0	0	0	#N/A	N/A	N/A	N/A	N/A	#N/A	#N/A	#N/A	#N/A	#N/A
dd_Smed_v6_103908_0_1	0	0	0	0	0	0	0	0	0	0	0	0	0	#N/A	N/A	N/A	N/A	N/A	#N/A	#N/A	#N/A	#N/A	#N/A
dd_Smed_v6_10391_0_1	564	572	435	577	654	747	572.816	530.874	534.285	601.271	611.265	637.287	581.3	0.175914	0.0935107	1.88121	0.0599428	0.891022	1.12968	NO	NO	NO	NO
dd_Smed_v6_103917_0_1	0	0	0	0	0	0	0	0	0	0	0	0	0	#N/A	N/A	N/A	N/A	N/A	#N/A	#N/A	#N/A	#N/A	#N/A
dd_Smed_v6_10392_0_1	269	260	203	241	281	321	273.205	241.306	249.333	251.138	262.638	273.854	258.579	0.0454073	0.13881	0.327117	0.743579	0.999994	1.03197	NO	NO	NO	NO
dd_Smed_v6_10392_0_2	72	84	53	66	73	118	73.1255	77.9605	65.0968	68.7763	68.2299	100.669	75.643	0.137454	0.300093	0.458037	0.646926	0.999994	1.09996	NO	NO	NO	NO
dd_Smed_v6_10392_0_3	83	83	78	77	92	114	84.2975	77.0324	95.8029	80.239	85.9884	97.2566	86.7694	0.0419643	0.241905	0.173474	0.862279	0.999994	1.02951	NO	NO	NO	NO
dd_Smed_v6_103920_0_1	0	0	0	0	0	0	0	0	0	0	0	0	0	#N/A	N/A	N/A	N/A	N/A	#N/A	#N/A	#N/A	#N/A	#N/A
dd_Smed_v6_103928_0_1	0	0	0	0	0	0	0	0	0	0	0	0	0	#N/A	N/A	N/A	N/A	N/A	#N/A	#N/A	#N/A	#N/A	#N/A
dd_Smed_v6_10393_0_1	280	301	268	271	277	327	284.377	279.359	329.169	282.4	258.9	278.973	285.529	-0.119582	0.142391	-0.839815	0.401012	0.999994	-1.08642	NO	NO	NO	NO
dd_Smed_v6_103932_0_1	0	0	0	0	0	0	0	0	0	0	0	0	0	#N/A	N/A	N/A	N/A	N/A	#N/A	#N/A	#N/A	#N/A	#N/A
dd_Smed_v6_103938_0_1	1	0	0	0	0	0	1.01563	0	0	0	0	0	0.169272	-3.30343	4.791	-0.689508	0.490504	N/A	-9.8726	-9.8726	NO	NO	NO
dd_Smed_v6_10394_0_1	330	356	251	300	332	329	335.159	330.404	308.289	312.619	310.306	280.679	312.909	-0.110838	0.127541	-0.869037	0.384827	0.999994	-1.07986	NO	NO	NO	NO
dd_Smed_v6_103943_0_1	0	1	0	0	0	0	0	0.928102	0	0	0	0	0.154684	-3.20437	4.80681	-0.666631	0.505008	N/A	-9.21747	-9.21747	NO	NO	NO
dd_Smed_v6_10395_0_1	88	75	76	75	85	74	89.3756	69.6076	93.3464	78.1549	79.4458	63.1315	78.8436	-0.191145	0.273065	-0.699997	0.483929	0.999994	-1.14167	NO	NO	NO	NO
dd_Smed_v6_103954_0_1	0	0	0	0	0	0	0	0	0	0	0	0	0	#N/A	N/A	N/A	N/A	N/A	#N/A	#N/A	#N/A	#N/A	#N/A
dd_Smed_v6_103956_0_1	0	0	0	0	0	0	0	0	0	0	0	0	0	#N/A	N/A	N/A	N/A	N/A	#N/A	#N/A	#N/A	#N/A	#N/A
dd_Smed_v6_103957_0_1	0	1	0	0	0	0	0	0.928102	0	0	0	0	0.154684	-3.20437	4.80681	-0.666631	0.505008	N/A	-9.21747	-9.21747	NO	NO	NO
dd_Smed_v6_10396_0_1	236	230	171	199	272	228	239.689	213.463	210.029	207.371	254.226	194.513	219.882	-0.0164412	0.184282	-0.0892175	0.928909	0.999994	-1.01146	NO	NO	NO	NO
dd_Smed_v6_10397_0_1	113	106	93	105	152	138	114.766	98.3788	114.226	109.417	142.068	117.732	116.098	0.176629	0.224433	0.786998	0.431283	0.999994	1.13024	NO	NO	NO	NO
dd_Smed_v6_10398_0_1	580	638	447	585	708	617	589.067	592.129	549.024	609.608	661.736	526.38	587.991	0.0535429	0.128397	0.417011	0.67667	0.999994	1.03781	NO	NO	NO	NO
dd_Smed_v6_103983_0_1	0	0	0	0	0	0	0	0	0	0	0	0	0	#N/A	N/A	N/A	N/A	N/A	#N/A	#N/A	#N/A	#N/A	#N/A
dd_Smed_v6_10399_0_1	210	242	170	195	215	330	213.283	224.601	208.801	203.203	200.951	281.532	222.062	0.0858799	0.207043	0.414792	0.678294	0.999994	1.06133	NO	NO	NO	NO
dd_Smed_v6_104_0_1	5243	5819	4535	5045	4696	5890	5324.96	5400.62	5570.08	5257.22	4389.14	5024.92	5161.16	-0.151503	0.0804966	-1.8821	0.0598226	0.891022	-1.11073	NO	NO	NO	NO
dd_Smed_v6_1040_0_1	1481	1514	1174	1247	1306	1657	1504.15	1405.15	1441.96	1299.45	1220.66	1413.63	1380.83	-0.144917	0.0859025	-1.687	0.0916041	0.999994	-1.10567	NO	NO	NO	NO
dd_Smed_v6_10400_0_1	234	273	223	208	284	319	237.658	253.372	273.898	216.749	265.442	272.148	253.211	-0.0165886	0.167376	-0.0991097	0.921051	0.999994	-1.01156	NO	NO	NO	NO
dd_Smed_v6_104002_0_1	0	0	0	0	0	0	0	0	0	0	0	0	0	#N/A	N/A	N/A	N/A	N/A	#N/A	#N/A	#N/A	#N/A	#N/A
dd_Smed_v6_104003_0_1	0	0	0	0	1	0	0	0	0	0	0.934656	0	0.155776	3.01414	4.78601	0.62978	0.528838	N/A	8.07877	NO	NO	8.07877	NO
dd_Smed_v6_104016_0_1	0	0	0	0	0	0	0	0	0	0	0	0	0	#N/A	N/A	N/A	N/A	N/A	#N/A	#N/A	#N/A	#N/A	#N/A
dd_Smed_v6_10402_0_1	393	414	336	333	438	492	399.143	384.234	412.689	347.008	409.379	419.739	395.365	-0.0214789	0.131982	-0.162741	0.870722	0.999994	-1.015	NO	NO	NO	NO
dd_Smed_v6_10403_0_1	108	118	123	101	126	135	109.688	109.516	151.074	105.249	117.767	115.172	118.078	-0.124445	0.237934	-0.523025	0.600957	0.999994	-1.09009	NO	NO	NO	NO
dd_Smed_v6_10404_0_1	214	209	176	191	241	233	217.345	193.973	216.171	199.034	225.252	198.779	208.426	-0.00839882	0.157964	-0.0531692	0.957597	0.999994	-1.00584	NO	NO	NO	NO
dd_Smed_v6_10405_0_1	196	237	173	177	233	256	199.064	219.96	212.486	184.445	217.775	218.401	208.688	-0.0233601	0.162	-0.144198	0.885344	0.999994	-1.01632	NO	NO	NO	NO
dd_Smed_v6_10406_0_1	630	819	492	624	681	901	639.848	760.115	604.295	650.248	636.501	768.668	676.613	0.035573	0.146091	0.243499	0.807619	0.999994	1.02496	NO	NO	NO	NO
dd_Smed_v6_10407_0_1	2	0	4	0	0	0	2.03126	0	4.91297	0	0	0	1.15737	-6.05443	4.00967	-1.50996	0.131055	N/A	-66.4608	-66.4608	NO	NO	NO
dd_Smed_v6_10407_0_10	0	5	0	0	0	0	0	4.64051	0	0	0	0	0.773418	-5.49405	4.61333	-1.19091	0.23369	N/A	-45.0687	-45.0687	NO	NO	NO
dd_Smed_v6_10407_0_11	0	0	0	0	0	0	0	0	0	0	0	0	0	#N/A	N/A	N/A	N/A	N/A	#N/A	#N/A	#N/A	#N/A	#N/A
dd_Smed_v6_10407_0_12	0	0	0	5	0	0	0	0	0	5.21032	0	0	0.868387	5.48258	4.60338	1.19099	0.233658	N/A	44.7117	NO	NO	44.7117	NO
dd_Smed_v6_10407_0_13	0	0	0	0	0	0	0	0	0	0	0	0	0	#N/A	N/A	N/A	N/A	N/A	#N/A	#N/A	#N/A	#N/A	#N/A
dd_Smed_v6_10407_0_14	0	0	0	0	5	0	0	0	0	0	4.67328	0	0.77888	5.3342	4.60784	1.15764	0.247013	N/A	40.3416	NO	NO	40.3416	NO
dd_Smed_v6_10407_0_15	0	0	0	0	0	0	0	0	0	0	0	0	0	#N/A	N/A	N/A	N/A	N/A	#N/A	#N/A	#N/A	#N/A	#N/A
dd_Smed_v6_10407_0_16	0	0	0	0	0	0	0	0	0	0	0	0	0	#N/A	N/A	N/A	N/A	N/A	#N/A	#N/A	#N/A	#N/A	#N/A
dd_Smed_v6_10407_0_17	1	0	0	6	0	6	1.01563	0	0	6.25239	0	5.11877	2.06446	3.46132	2.69609	1.28383	0.199202	N/A	11.0144	NO	NO	11.0144	NO
dd_Smed_v6_10407_0_18	0	0	0	0	0	0	0	0	0	0	0	0	0	#N/A	N/A	N/A	N/A	N/A	#N/A	#N/A	#N/A	#N/A	#N/A
dd_Smed_v6_10407_0_19	0	2	0	0	0	0	0	1.8562	0	0	0	0	0.309367	-4.18616	4.68779	-0.892993	0.371861	N/A	-18.2037	-18.2037	NO	NO	NO
dd_Smed_v6_10407_0_2	0	0	0	15	3	0	0	0	0	15.631	2.80397	0	3.07249	7.3093	3.65082	2.0021	0.0452743	N/A	158.605	NO	NO	158.605	NO
dd_Smed_v6_10407_0_20	0	0	0	0	0	0	0	0	0	0	0	0	0	#N/A	N/A	N/A	N/A	N/A	#N/A	#N/A	#N/A	#N/A	#N/A
dd_Smed_v6_10407_0_21	2	0	1	3	0	3	2.03126	0	1.22824	3.12619	0	2.55938	1.49085	0.813806	2.19509	0.370739	0.710832	N/A	1.75784	NO	NO	1.75784	NO
dd_Smed_v6_10407_0_22	0	3	0	0	0	0	0	2.78431	0	0	0	0	0.464051	-4.76369	4.64675	-1.02517	0.305285	N/A	-27.1651	-27.1651	NO	NO	NO
dd_Smed_v6_10407_0_23	8	3	2	0	12	26	8.12506	2.78431	2.45648	0	11.2159	22.1813	7.79384	1.32259	1.50259	0.880205	0.378748	0.999994	2.50114	NO	NO	2.50114	NO
dd_Smed_v6_10407_0_24	0	10	0	0	2	0	0	9.28102	0	0	1.86931	0	1.85839	-2.31599	3.87971	-0.596949	0.550542	N/A	-4.97946	-4.97946	NO	NO	NO
dd_Smed_v6_10407_0_25	0	0	0	1	0	0	0	0	0	1.04206	0	0	0.173677	3.13559	4.76834	0.657585	0.510805	N/A	8.78834	NO	NO	8.78834	NO
dd_Smed_v6_10407_0_26	0	0	0	0	0	0	0	0	0	0	0	0	0	#N/A	N/A	N/A	N/A	N/A	#N/A	#N/A	#N/A	#N/A	#N/A
dd_Smed_v6_10407_0_27	0	0	0	7	0	0	0	0	0	7.29445	0	0	1.21574	5.97016	4.59158	1.30024	0.193518	N/A	62.6899	NO	NO	62.6899	NO
dd_Smed_v6_10407_0_28	0	0	0	0	0	0	0	0	0	0	0	0	0	#N/A	N/A	N/A	N/A	N/A	#N/A	#N/A	#N/A	#N/A	#N/A
dd_Smed_v6_10407_0_29	0	0	0	0	2	0	0	0	0	0	1.86931	0	0.311552	4.01314	4.67553	0.858328	0.390711	N/A	16.1464	NO	NO	16.1464	NO
dd_Smed_v6_10407_0_3	0	5	2	7	0	0	0	4.64051	2.45648	7.29445	0	0	2.39857	0.0266289	2.83129	0.00940521	0.992496	N/A	1.01863	NO	NO	NO	NO
dd_Smed_v6_10407_0_30	0	0	0	0	0	0	0	0	0	0	0	0	0	#N/A	N/A	N/A	N/A	N/A	#N/A	#N/A	#N/A	#N/A	#N/A
dd_Smed_v6_10407_0_31	6	0	0	0	0	0	6.09379	0	0	0	0	0	1.01563	-5.8787	4.6014	-1.27759	0.201394	N/A	-58.839	-58.839	NO	NO	NO
dd_Smed_v6_10407_0_32	0	0	0	5	0	0	0	0	0	5.21032	0	0	0.868387	5.48258	4.60338	1.19099	0.233658	N/A	44.7117	NO	NO	44.7117	NO
dd_Smed_v6_10407_0_33	0	0	0	0	0	0	0	0	0	0	0	0	0	#N/A	N/A	N/A	N/A	N/A	#N/A	#N/A	#N/A	#N/A	#N/A
dd_Smed_v6_10407_0_34	0	0	0	0	0	0	0	0	0	0	0	0	0	#N/A	N/A	N/A	N/A	N/A	#N/A	#N/A	#N/A	#N/A	#N/A
dd_Smed_v6_10407_0_35	2	2	4	5	6	1	2.03126	1.8562	4.91297	5.21032	5.60794	0.853128	3.41197	0.419485	1.27073	0.330115	0.741313	N/A	1.33745	NO	NO	NO	NO
dd_Smed_v6_10407_0_36	7	5	6	5	3	1	7.10942	4.64051	7.36945	5.21032	2.80397	0.853128	4.66447	-1.12831	1.07206	-1.05247	0.292583	N/A	-2.18603	-2.18603	NO	NO	NO
dd_Smed_v6_10407_0_38	4	4	4	6	4	6	4.06253	3.71241	4.91297	6.25239	3.73862	5.11877	4.63295	0.25599	0.917559	0.27899	0.780253	N/A	1.19415	NO	NO	NO	NO
dd_Smed_v6_10407_0_39	89	107	63	69	70	59	90.3913	99.3069	77.3792	71.9025	65.4259	50.3345	75.7901	-0.516777	0.284884	-1.81399	0.0696794	0.934164	-1.43076	-1.43076	NO	NO	NO
dd_Smed_v6_10407_0_4	0	0	0	0	0	0	0	0	0	0	0	0	0	#N/A	N/A	N/A	N/A	N/A	#N/A	#N/A	#N/A	#N/A	#N/A
dd_Smed_v6_10407_0_40	1	1	3	1	1	1	1.01563	0.928102	3.68473	1.04206	0.934656	0.853128	1.40972	-0.960524	1.67374	-0.573879	0.56605	N/A	-1.94602	-1.94602	NO	NO	NO
dd_Smed_v6_10407_0_41	0	0	0	6	1	0	0	0	0	6.25239	0.934656	0	1.19784	5.94758	4.12553	1.44165	0.149401	N/A	61.7164	NO	NO	61.7164	NO
dd_Smed_v6_10407_0_42	0	0	1	0	0	0	0	0	1.22824	0	0	0	0.204707	-3.51601	4.76036	-0.738603	0.460148	N/A	-11.44	-11.44	NO	NO	NO
dd_Smed_v6_10407_0_43	1	3	0	0	0	0	1.01563	2.78431	0	0	0	0	0.633323	-5.20656	4.48781	-1.16016	0.245985	N/A	-36.9259	-36.9259	NO	NO	NO
dd_Smed_v6_10407_0_44	0	0	0	0	0	1	0	0	0	0	0	0.853128	0.142188	2.91349	4.80177	0.606754	0.544014	N/A	7.53439	NO	NO	7.53439	NO
dd_Smed_v6_10407_0_45	1	0	0	2	0	0	1.01563	0	0	2.08413	0	0	0.516627	1.00636	4.1194	0.244299	0.806999	N/A	2.00884	NO	NO	2.00884	NO
dd_Smed_v6_10407_0_47	0	0	0	0	0	0	0	0	0	0	0	0	0	#N/A	N/A	N/A	N/A	N/A	#N/A	#N/A	#N/A	#N/A	#N/A
dd_Smed_v6_10407_0_48	0	0	0	0	0	0	0	0	0	0	0	0	0	#N/A	N/A	N/A	N/A	N/A	#N/A	#N/A	#N/A	#N/A	#N/A
dd_Smed_v6_10407_0_49	0	0	0	1	0	1	0	0	0	1.04206	0	0.853128	0.315865	4.02876	4.67433	0.861891	0.388748	N/A	16.3221	NO	NO	16.3221	NO
dd_Smed_v6_10407_0_5	0	11	1	0	0	3	0	10.2091	1.22824	0	0	2.55938	2.33279	-2.14235	2.81687	-0.760543	0.44693	N/A	-4.4148	-4.4148	NO	NO	NO
dd_Smed_v6_10407_0_50	4	0	0	0	0	0	4.06253	0	0	0	0	0	0.677088	-5.295	4.62086	-1.14589	0.25184	N/A	-39.2604	-39.2604	NO	NO	NO
dd_Smed_v6_10407_0_51	4	0	0	0	0	0	4.06253	0	0	0	0	0	0.677088	-5.295	4.62086	-1.14589	0.25184	N/A	-39.2604	-39.2604	NO	NO	NO
dd_Smed_v6_10407_0_52	0	0	2	0	0	0	0	0	2.45648	0	0	0	0.409414	-4.5381	4.6609	-0.973652	0.330229	N/A	-23.2329	-23.2329	NO	NO	NO
dd_Smed_v6_10407_0_53	0	2	0	0	0	0	0	1.8562	0	0	0	0	0.309367	-4.18616	4.68779	-0.892993	0.371861	N/A	-18.2037	-18.2037	NO	NO	NO
dd_Smed_v6_10407_0_54	0	0	0	1	0	0	0	0	0	1.04206	0	0	0.173677	3.13559	4.76834	0.657585	0.510805	N/A	8.78834	NO	NO	8.78834	NO
dd_Smed_v6_10407_0_55	0	0	0	0	0	0	0	0	0	0	0	0	0	#N/A	N/A	N/A	N/A	N/A	#N/A	#N/A	#N/A	#N/A	#N/A
dd_Smed_v6_10407_0_56	1	1	1	0	0	0	1.01563	0.928102	1.22824	0	0	0	0.528663	-4.93007	3.65289	-1.34963	0.177133	N/A	-30.4859	-30.4859	NO	NO	NO
dd_Smed_v6_10407_0_6	3	0	4	0	4	0	3.0469	0	4.91297	0	3.73862	0	1.94975	-1.07962	2.78806	-0.387231	0.698585	N/A	-2.11348	-2.11348	NO	NO	NO
dd_Smed_v6_10407_0_7	0	0	0	0	0	0	0	0	0	0	0	0	0	#N/A	N/A	N/A	N/A	N/A	#N/A	#N/A	#N/A	#N/A	#N/A
dd_Smed_v6_10407_0_8	0	0	0	0	0	3	0	0	0	0	0	2.55938	0.426564	4.47843	4.64455	0.964234	0.334928	N/A	22.2916	NO	NO	22.2916	NO
dd_Smed_v6_10407_0_9	14	19	17	35	13	12	14.2188	17.6339	20.8801	36.4723	12.1505	10.2375	18.5989	0.152645	0.721545	0.211553	0.832455	0.999994	1.11161	NO	NO	NO	NO
dd_Smed_v6_104071_0_1	0	0	0	0	1	0	0	0	0	0	0.934656	0	0.155776	3.01414	4.78601	0.62978	0.528838	N/A	8.07877	NO	NO	8.07877	NO
dd_Smed_v6_104079_0_1	1	0	0	0	0	0	1.01563	0	0	0	0	0	0.169272	-3.30343	4.791	-0.689508	0.490504	N/A	-9.8726	-9.8726	NO	NO	NO
dd_Smed_v6_10408_0_1	407	433	310	411	429	498	413.362	401.868	380.755	428.289	400.967	424.858	408.35	0.0669212	0.108379	0.617473	0.536922	0.999994	1.04748	NO	NO	NO	NO
dd_Smed_v6_104085_0_1	0	0	0	0	1	0	0	0	0	0	0.934656	0	0.155776	3.01414	4.78601	0.62978	0.528838	N/A	8.07877	NO	NO	8.07877	NO
dd_Smed_v6_10409_0_1	122	74	65	109	95	97	123.907	68.6795	79.8357	113.585	88.7923	82.7534	92.9255	0.0636594	0.342192	0.186034	0.852418	0.999994	1.04511	NO	NO	NO	NO
dd_Smed_v6_10409_0_2	176	228	123	258	248	156	178.751	211.607	151.074	268.853	231.795	133.088	195.861	0.223639	0.327551	0.682761	0.494758	0.999994	1.16768	NO	NO	NO	NO
dd_Smed_v6_10409_0_3	24	16	0	0	0	0	24.3752	14.8496	0	0	0	0	6.53747	-8.56503	3.32956	-2.57242	0.010099	0.370665	-378.732	-378.732	NO	NO	NO
dd_Smed_v6_10409_0_4	0	13	0	0	0	0	0	12.0653	0	0	0	0	2.01089	-6.86586	4.58197	-1.49845	0.134016	N/A	-116.636	-116.636	NO	NO	NO
dd_Smed_v6_10409_0_5	15	25	17	0	33	36	15.2345	23.2025	20.8801	0	30.8436	30.7126	20.1456	0.0564192	1.25847	0.0448317	0.964241	0.999994	1.03988	NO	NO	NO	NO
dd_Smed_v6_10409_0_6	0	15	23	0	22	12	0	13.9215	28.2496	0	20.5624	10.2375	12.1618	-0.448599	1.90742	-0.235186	0.814064	0.999994	-1.36471	NO	NO	NO	NO
dd_Smed_v6_10409_0_7	97	114	95	68	104	101	98.5163	105.804	116.683	70.8604	97.2042	86.1659	95.8722	-0.331963	0.244758	-1.35629	0.175006	0.999994	-1.25873	NO	NO	NO	NO
dd_Smed_v6_1041_0_1	1300	1555	1065	1132	1226	1436	1320.32	1443.2	1308.08	1179.62	1145.89	1225.09	1270.37	-0.198308	0.077695	-2.55239	0.0106988	0.380069	-1.14735	NO	NO	NO	NO
dd_Smed_v6_10410_0_1	49	41	43	54	51	50	49.766	38.0522	52.8144	56.2715	47.6675	42.6564	47.8713	0.0620306	0.333125	0.186208	0.852282	0.999994	1.04393	NO	NO	NO	NO
dd_Smed_v6_104101_0_1	1	0	0	0	0	0	1.01563	0	0	0	0	0	0.169272	-3.30343	4.791	-0.689508	0.490504	N/A	-9.8726	-9.8726	NO	NO	NO
dd_Smed_v6_104105_0_1	0	0	0	0	0	0	0	0	0	0	0	0	0	#N/A	N/A	N/A	N/A	N/A	#N/A	#N/A	#N/A	#N/A	#N/A
dd_Smed_v6_10411_0_1	126	142	111	100	144	184	127.97	131.79	136.335	104.206	134.59	156.976	131.978	0.00288206	0.237063	0.0121574	0.9903	0.999994	1.002	NO	NO	NO	NO
dd_Smed_v6_10411_0_2	80	120	73	89	97	138	81.2506	111.372	89.6617	92.7438	90.6616	117.732	97.2369	0.0928167	0.265775	0.34923	0.726916	0.999994	1.06645	NO	NO	NO	NO
dd_Smed_v6_10411_0_3	80	58	60	81	112	143	81.2506	53.8299	73.6945	84.4072	104.681	121.997	86.6435	0.581061	0.305525	1.90184	0.0571918	0.883469	1.49595	NO	NO	1.49595	NO
dd_Smed_v6_10412_0_1	116	110	99	100	124	140	117.813	102.091	121.596	104.206	115.897	119.438	113.507	-0.00336117	0.207663	-0.0161857	0.987086	0.999994	-1.00233	NO	NO	NO	NO
dd_Smed_v6_104122_0_1	0	0	0	0	0	0	0	0	0	0	0	0	0	#N/A	N/A	N/A	N/A	N/A	#N/A	#N/A	#N/A	#N/A	#N/A
dd_Smed_v6_10413_0_1	37	54	51	41	47	50	37.5784	50.1175	62.6403	42.7247	43.9288	42.6564	46.6077	-0.211662	0.34905	-0.606394	0.544253	0.999994	-1.15802	NO	NO	NO	NO
dd_Smed_v6_104131_0_1	0	0	0	0	0	1	0	0	0	0	0	0.853128	0.142188	2.91349	4.80177	0.606754	0.544014	N/A	7.53439	NO	NO	7.53439	NO
dd_Smed_v6_104132_0_1	0	0	0	0	0	0	0	0	0	0	0	0	0	#N/A	N/A	N/A	N/A	N/A	#N/A	#N/A	#N/A	#N/A	#N/A
dd_Smed_v6_10414_0_1	188	167	138	168	196	185	190.939	154.993	169.497	175.067	183.193	157.829	171.92	0.00151935	0.183332	0.00828742	0.993388	0.999994	1.00105	NO	NO	NO	NO
dd_Smed_v6_104141_0_1	0	0	0	0	0	0	0	0	0	0	0	0	0	#N/A	N/A	N/A	N/A	N/A	#N/A	#N/A	#N/A	#N/A	#N/A
dd_Smed_v6_10415_0_1	0	56	13	39	103	95	0	51.9737	15.9671	40.6405	96.2696	81.0471	47.6497	1.67868	1.23278	1.36171	0.173291	0.999994	3.20136	NO	NO	3.20136	NO
dd_Smed_v6_10415_0_2	22	0	44	0	0	0	22.3439	0	54.0426	0	0	0	12.7311	-9.5217	3.29438	-2.89028	0.00384895	0.219398	-735.049	-735.049	NO	NO	NO
dd_Smed_v6_10415_0_3	92	33	36	74	4	0	93.4382	30.6274	44.2167	77.1128	3.73862	0	41.5223	-1.06052	1.52964	-0.693318	0.48811	0.999994	-2.08569	-2.08569	NO	NO	NO
dd_Smed_v6_10415_0_4	129	173	112	131	195	181	131.017	160.562	137.563	136.51	182.258	154.416	150.388	0.140243	0.216008	0.649246	0.516179	0.999994	1.10209	NO	NO	NO	NO
dd_Smed_v6_104168_0_1	0	0	0	0	0	0	0	0	0	0	0	0	0	#N/A	N/A	N/A	N/A	N/A	#N/A	#N/A	#N/A	#N/A	#N/A
dd_Smed_v6_10417_0_1	344	396	281	381	391	468	349.377	367.528	345.136	397.027	365.451	399.264	370.63	0.128244	0.114856	1.11656	0.264182	0.999994	1.09296	NO	NO	NO	NO
dd_Smed_v6_104171_0_1	0	1	1	0	0	0	0	0.928102	1.22824	0	0	0	0.359391	-4.37004	4.67295	-0.93518	0.349696	N/A	-20.6783	-20.6783	NO	NO	NO
dd_Smed_v6_104174_0_1	0	0	0	0	0	0	0	0	0	0	0	0	0	#N/A	N/A	N/A	N/A	N/A	#N/A	#N/A	#N/A	#N/A	#N/A
dd_Smed_v6_10418_0_1	82	121	65	124	116	107	83.2818	112.3	79.8357	129.216	108.42	91.2847	100.723	0.249347	0.281967	0.884312	0.376528	0.999994	1.18867	NO	NO	NO	NO
dd_Smed_v6_104181_0_1	0	0	0	0	0	0	0	0	0	0	0	0	0	#N/A	N/A	N/A	N/A	N/A	#N/A	#N/A	#N/A	#N/A	#N/A
dd_Smed_v6_10419_0_1	306	358	264	327	328	314	310.783	332.26	324.256	340.755	306.567	267.882	313.751	-0.0822131	0.150049	-0.547908	0.583755	0.999994	-1.05864	NO	NO	NO	NO
dd_Smed_v6_104194_0_1	0	1	0	0	0	0	0	0.928102	0	0	0	0	0.154684	-3.20437	4.80681	-0.666631	0.505008	N/A	-9.21747	-9.21747	NO	NO	NO
dd_Smed_v6_104197_0_1	0	0	0	0	0	0	0	0	0	0	0	0	0	#N/A	N/A	N/A	N/A	N/A	#N/A	#N/A	#N/A	#N/A	#N/A
dd_Smed_v6_104198_0_1	0	0	0	0	0	0	0	0	0	0	0	0	0	#N/A	N/A	N/A	N/A	N/A	#N/A	#N/A	#N/A	#N/A	#N/A
dd_Smed_v6_10420_0_1	288	314	251	290	371	426	292.502	291.424	308.289	302.199	346.757	363.432	317.434	0.185234	0.137938	1.34288	0.179312	0.999994	1.137	NO	NO	NO	NO
dd_Smed_v6_10421_0_1	161	166	116	159	204	211	163.517	154.065	142.476	165.688	190.67	180.01	166.071	0.220384	0.172739	1.27582	0.202019	0.999994	1.16504	NO	NO	NO	NO
dd_Smed_v6_104218_0_1	0	0	0	0	0	0	0	0	0	0	0	0	0	#N/A	N/A	N/A	N/A	N/A	#N/A	#N/A	#N/A	#N/A	#N/A
dd_Smed_v6_10422_0_1	78	98	78	120	0	0	79.2193	90.954	95.8029	125.048	0	0	65.1706	-1.08945	2.65325	-0.410607	N/A	N/A	-2.12792	-2.12792	NO	NO	NO
dd_Smed_v6_10422_0_2	145	180	77	124	175	211	147.267	167.058	94.5746	129.216	163.565	180.01	146.948	0.206441	0.300905	0.686068	0.49267	0.999994	1.15384	NO	NO	NO	NO
dd_Smed_v6_10422_0_3	12	7	33	6	48	43	12.1876	6.49671	40.532	6.25239	44.8635	36.6845	24.5028	0.580215	0.995955	0.582572	0.560182	0.999994	1.49507	NO	NO	1.49507	NO
dd_Smed_v6_10422_0_4	27	18	21	18	26	52	27.4221	16.7058	25.7931	18.7572	24.3011	44.3626	26.2236	0.33261	0.558516	0.595525	0.551493	0.999994	1.25929	NO	NO	NO	NO
dd_Smed_v6_10422_0_5	0	0	0	0	2	10	0	0	0	0	1.86931	8.53128	1.73343	6.49315	3.82804	1.69621	0.0898467	N/A	90.081	NO	NO	90.081	NO
dd_Smed_v6_104236_0_1	0	0	0	0	0	0	0	0	0	0	0	0	0	#N/A	N/A	N/A	N/A	N/A	#N/A	#N/A	#N/A	#N/A	#N/A
dd_Smed_v6_10424_0_1	213	246	139	180	236	227	216.33	228.313	170.726	187.572	220.579	193.66	202.863	-0.0356219	0.194243	-0.183388	0.854493	0.999994	-1.025	NO	NO	NO	NO
dd_Smed_v6_10424_0_2	20	48	48	66	30	37	20.3126	44.5489	58.9556	68.7763	28.0397	31.5657	42.0331	0.0521735	0.61554	0.0847606	0.932452	0.999994	1.03683	NO	NO	NO	NO
dd_Smed_v6_10425_0_1	481	472	309	582	460	310	488.519	438.064	379.527	606.482	429.942	264.47	434.5	-0.00734411	0.316648	-0.0231933	0.981496	0.999994	-1.0051	NO	NO	NO	NO
dd_Smed_v6_10426_0_1	506	564	425	485	554	489	513.91	523.449	522.003	505.401	517.799	417.18	499.957	-0.115851	0.129646	-0.8936	0.371536	0.999994	-1.08361	NO	NO	NO	NO
dd_Smed_v6_10427_0_1	342	390	331	392	426	483	347.346	361.96	406.548	408.489	398.163	412.061	389.095	0.12991	0.120051	1.08212	0.279199	0.999994	1.09423	NO	NO	NO	NO
dd_Smed_v6_10427_0_2	46	34	26	25	39	58	46.7191	31.5555	31.9343	26.0516	36.4516	49.4814	37.0322	0.0271385	0.443883	0.0611388	0.951249	0.999994	1.01899	NO	NO	NO	NO
dd_Smed_v6_104276_0_1	0	0	0	0	0	0	0	0	0	0	0	0	0	#N/A	N/A	N/A	N/A	N/A	#N/A	#N/A	#N/A	#N/A	#N/A
dd_Smed_v6_10428_0_1	58	80	69	52	55	65	58.9067	74.2481	84.7487	54.1874	51.4061	55.4533	63.1584	-0.432306	0.289696	-1.49227	0.135627	0.999994	-1.34939	NO	NO	NO	NO
dd_Smed_v6_104282_0_1	0	0	0	0	0	0	0	0	0	0	0	0	0	#N/A	N/A	N/A	N/A	N/A	#N/A	#N/A	#N/A	#N/A	#N/A
dd_Smed_v6_104285_0_1	1	0	0	0	0	0	1.01563	0	0	0	0	0	0.169272	-3.30343	4.791	-0.689508	0.490504	N/A	-9.8726	-9.8726	NO	NO	NO
dd_Smed_v6_10429_0_1	71	183	144	289	87	177	72.1099	169.843	176.867	301.157	81.3151	151.004	158.716	0.348637	0.569938	0.61171	0.54073	0.999994	1.27336	NO	NO	NO	NO
dd_Smed_v6_10429_0_2	258	196	125	97	278	207	262.033	181.908	153.53	101.08	259.834	176.597	189.164	-0.152379	0.41141	-0.370383	0.711097	0.999994	-1.1114	NO	NO	NO	NO
dd_Smed_v6_1043_0_1	3159	3045	2779	2541	3107	2852	3208.38	2826.07	3413.28	2647.89	2903.98	2433.12	2905.45	-0.242318	0.106105	-2.28375	0.0223859	0.58046	-1.18289	NO	NO	NO	NO
dd_Smed_v6_104303_0_1	1	1	0	0	0	0	1.01563	0.928102	0	0	0	0	0.323956	-4.24305	4.683	-0.906055	0.364907	N/A	-18.9359	-18.9359	NO	NO	NO
dd_Smed_v6_104304_0_1	0	1	0	0	1	0	0	0.928102	0	0	0.934656	0	0.31046	-0.0306605	4.27335	-0.00717482	0.994275	N/A	-1.02148	NO	NO	NO	NO
dd_Smed_v6_10431_0_1	456	522	412	521	572	521	463.128	484.469	506.036	542.916	534.623	444.48	495.942	0.0656786	0.130792	0.50216	0.615555	0.999994	1.04658	NO	NO	NO	NO
dd_Smed_v6_104318_0_1	0	0	0	0	0	0	0	0	0	0	0	0	0	#N/A	N/A	N/A	N/A	N/A	#N/A	#N/A	#N/A	#N/A	#N/A
dd_Smed_v6_104332_0_1	0	0	0	0	0	0	0	0	0	0	0	0	0	#N/A	N/A	N/A	N/A	N/A	#N/A	#N/A	#N/A	#N/A	#N/A
dd_Smed_v6_10434_0_1	312	305	217	288	343	317	316.877	283.071	266.528	300.115	320.587	270.442	292.937	0.0382489	0.151667	0.252189	0.800895	0.999994	1.02687	NO	NO	NO	NO
dd_Smed_v6_104348_0_1	0	0	0	0	0	0	0	0	0	0	0	0	0	#N/A	N/A	N/A	N/A	N/A	#N/A	#N/A	#N/A	#N/A	#N/A
dd_Smed_v6_10435_0_1	326	374	257	282	371	368	331.096	347.11	315.658	293.862	346.757	313.951	324.739	-0.0589418	0.134312	-0.438842	0.660776	0.999994	-1.0417	NO	NO	NO	NO
dd_Smed_v6_10436_0_1	197	223	136	167	183	202	200.08	206.967	167.041	174.025	171.042	172.332	181.914	-0.154079	0.171703	-0.89736	0.369527	0.999994	-1.11271	NO	NO	NO	NO
dd_Smed_v6_10436_0_2	7	15	26	7	9	6	7.10942	13.9215	31.9343	7.29445	8.4119	5.11877	12.2984	-1.33909	0.835659	-1.60243	0.10906	0.999994	-2.52992	-2.52992	NO	NO	NO
dd_Smed_v6_104361_0_1	0	0	0	0	0	0	0	0	0	0	0	0	0	#N/A	N/A	N/A	N/A	N/A	#N/A	#N/A	#N/A	#N/A	#N/A
dd_Smed_v6_10437_0_1	357	527	328	404	524	645	362.581	489.11	402.863	420.994	489.76	550.267	452.596	0.219772	0.182719	1.20279	0.229059	0.999994	1.16455	NO	NO	NO	NO
dd_Smed_v6_10438_0_1	234	314	210	217	300	332	237.658	291.424	257.931	226.128	280.397	283.238	262.796	0.00567984	0.17719	0.0320551	0.974428	0.999994	1.00394	NO	NO	NO	NO
dd_Smed_v6_10439_0_1	49	55	31	45	41	54	49.766	51.0456	38.0755	46.8929	38.3209	46.0689	45.0283	-0.0876665	0.329479	-0.266076	0.790181	0.999994	-1.06265	NO	NO	NO	NO
dd_Smed_v6_1044_0_1	6082	6234	5147	5601	6118	6965	6177.07	5785.79	6321.76	5836.6	5718.23	5942.04	5963.58	-0.0629506	0.0509498	-1.23554	0.216629	0.999994	-1.0446	NO	NO	NO	NO
dd_Smed_v6_10440_0_1	141	178	115	199	187	218	143.204	165.202	141.248	207.371	174.781	185.982	169.631	0.333398	0.181606	1.83583	0.0663821	0.918636	1.25998	NO	NO	NO	NO
dd_Smed_v6_104400_0_1	0	0	0	0	0	0	0	0	0	0	0	0	0	#N/A	N/A	N/A	N/A	N/A	#N/A	#N/A	#N/A	#N/A	#N/A
dd_Smed_v6_10441_0_1	193	251	169	183	214	274	196.017	232.954	207.573	190.698	200.016	233.757	210.169	-0.0269797	0.17653	-0.152833	0.87853	0.999994	-1.01888	NO	NO	NO	NO
dd_Smed_v6_104411_0_1	0	1	0	0	0	0	0	0.928102	0	0	0	0	0.154684	-3.20437	4.80681	-0.666631	0.505008	N/A	-9.21747	-9.21747	NO	NO	NO
dd_Smed_v6_10442_0_1	92	125	122	119	152	168	93.4382	116.013	149.846	124.006	142.068	143.325	128.116	0.193884	0.258504	0.750023	0.453241	0.999994	1.14384	NO	NO	NO	NO
dd_Smed_v6_104421_0_1	0	0	0	0	0	0	0	0	0	0	0	0	0	#N/A	N/A	N/A	N/A	N/A	#N/A	#N/A	#N/A	#N/A	#N/A
dd_Smed_v6_10443_0_1	146	129	113	139	170	169	148.282	119.725	138.791	144.847	158.892	144.179	142.453	0.140966	0.19228	0.73313	0.463479	0.999994	1.10264	NO	NO	NO	NO
dd_Smed_v6_10444_0_1	391	430	304	375	405	445	397.112	399.084	373.386	390.774	378.536	379.642	386.422	-0.0276956	0.10723	-0.258282	0.79619	0.999994	-1.01938	NO	NO	NO	NO
dd_Smed_v6_10445_0_1	74	85	49	58	79	93	75.1568	78.8886	60.1838	60.4398	73.8378	79.3409	71.308	-0.00595395	0.279962	-0.021267	0.983033	0.999994	-1.00414	NO	NO	NO	NO
dd_Smed_v6_10445_0_2	73	50	38	0	157	162	74.1411	46.4051	46.6732	0	146.741	138.207	75.3612	0.769406	1.32158	0.582184	0.560443	0.999994	1.70457	NO	NO	1.70457	NO
dd_Smed_v6_10445_0_3	36	108	75	151	0	0	36.5628	100.235	92.1181	157.352	0	0	64.3779	-0.541277	2.74467	-0.197211	N/A	N/A	-1.45526	-1.45526	NO	NO	NO
dd_Smed_v6_10445_0_4	25	13	16	22	17	22	25.3908	12.0653	19.6519	22.9254	15.8892	18.7688	19.1152	0.0139709	0.546928	0.0255442	0.979621	0.999994	1.00973	NO	NO	NO	NO
dd_Smed_v6_104453_0_1	0	0	0	0	0	0	0	0	0	0	0	0	0	#N/A	N/A	N/A	N/A	N/A	#N/A	#N/A	#N/A	#N/A	#N/A
dd_Smed_v6_10446_0_1	200	191	157	205	181	228	203.126	177.267	192.834	213.623	169.173	194.513	191.756	0.00997385	0.17906	0.0557011	0.95558	0.999994	1.00694	NO	NO	NO	NO
dd_Smed_v6_10447_0_1	215	236	174	195	213	286	218.361	219.032	213.714	203.203	199.082	243.995	216.231	-0.00920323	0.163861	-0.0561649	0.95521	0.999994	-1.0064	NO	NO	NO	NO
dd_Smed_v6_104475_0_1	0	0	0	0	0	0	0	0	0	0	0	0	0	#N/A	N/A	N/A	N/A	N/A	#N/A	#N/A	#N/A	#N/A	#N/A
dd_Smed_v6_10448_0_1	274	302	189	309	403	371	278.283	280.287	232.138	321.998	376.666	316.51	300.98	0.357607	0.16054	2.22752	0.0259123	0.632903	1.2813	NO	NO	NO	NO
dd_Smed_v6_104483_0_1	0	0	0	0	0	0	0	0	0	0	0	0	0	#N/A	N/A	N/A	N/A	N/A	#N/A	#N/A	#N/A	#N/A	#N/A
dd_Smed_v6_10449_0_1	290	363	274	326	346	355	294.533	336.901	336.538	339.713	323.391	302.86	322.323	-0.00369635	0.134528	-0.0274764	0.97808	0.999994	-1.00257	NO	NO	NO	NO
dd_Smed_v6_104490_0_1	0	0	0	0	0	0	0	0	0	0	0	0	0	#N/A	N/A	N/A	N/A	N/A	#N/A	#N/A	#N/A	#N/A	#N/A
dd_Smed_v6_1045_0_1	628	743	507	486	366	408	637.817	689.58	622.719	506.443	342.084	348.076	524.453	-0.706728	0.194076	-3.64151	0.000271044	0.041158	-1.6321	-1.6321	YES	NO	NO
dd_Smed_v6_10450_0_1	38	39	31	33	54	48	38.594	36.196	38.0755	34.3881	50.4714	40.9501	39.7792	0.159737	0.349715	0.456764	0.647841	0.999994	1.11708	NO	NO	NO	NO
dd_Smed_v6_104512_0_1	0	1	0	0	0	0	0	0.928102	0	0	0	0	0.154684	-3.20437	4.80681	-0.666631	0.505008	N/A	-9.21747	-9.21747	NO	NO	NO
dd_Smed_v6_104519_0_1	0	1	0	0	0	0	0	0.928102	0	0	0	0	0.154684	-3.20437	4.80681	-0.666631	0.505008	N/A	-9.21747	-9.21747	NO	NO	NO
dd_Smed_v6_10452_0_1	715	720	550	549	714	737	726.177	668.233	675.533	572.094	667.344	628.755	656.356	-0.147182	0.105989	-1.38866	0.164936	0.999994	-1.1074	NO	NO	NO	NO
dd_Smed_v6_10453_0_1	256	255	213	204	274	273	260.002	236.666	261.616	212.581	256.096	232.904	243.311	-0.109559	0.153638	-0.713102	0.475783	0.999994	-1.0789	NO	NO	NO	NO
dd_Smed_v6_10454_0_1	522	561	415	559	576	671	530.16	520.665	509.72	582.514	538.362	572.449	542.312	0.116923	0.0942425	1.24066	0.214731	0.999994	1.08442	NO	NO	NO	NO
dd_Smed_v6_104542_0_1	1	0	0	0	0	0	1.01563	0	0	0	0	0	0.169272	-3.30343	4.791	-0.689508	0.490504	N/A	-9.8726	-9.8726	NO	NO	NO
dd_Smed_v6_104545_0_1	0	0	0	0	0	0	0	0	0	0	0	0	0	#N/A	N/A	N/A	N/A	N/A	#N/A	#N/A	#N/A	#N/A	#N/A
dd_Smed_v6_104547_0_1	0	0	0	0	0	0	0	0	0	0	0	0	0	#N/A	N/A	N/A	N/A	N/A	#N/A	#N/A	#N/A	#N/A	#N/A
dd_Smed_v6_10456_0_1	56	87	53	62	62	60	56.8754	80.7449	65.0968	64.608	57.9487	51.1877	62.7436	-0.228023	0.301236	-0.75696	0.449074	0.999994	-1.17123	NO	NO	NO	NO
dd_Smed_v6_104565_0_1	0	0	0	1	0	0	0	0	0	1.04206	0	0	0.173677	3.13559	4.76834	0.657585	0.510805	N/A	8.78834	NO	NO	8.78834	NO
dd_Smed_v6_104567_0_1	0	0	0	0	0	0	0	0	0	0	0	0	0	#N/A	N/A	N/A	N/A	N/A	#N/A	#N/A	#N/A	#N/A	#N/A
dd_Smed_v6_104574_0_1	0	0	0	0	0	0	0	0	0	0	0	0	0	#N/A	N/A	N/A	N/A	N/A	#N/A	#N/A	#N/A	#N/A	#N/A
dd_Smed_v6_10458_0_1	349	367	306	336	442	421	354.456	340.613	375.842	350.134	413.118	359.167	365.555	0.0697	0.132749	0.525051	0.599548	0.999994	1.0495	NO	NO	NO	NO
dd_Smed_v6_10458_0_2	20	36	11	22	14	28	20.3126	33.4117	13.5107	22.9254	13.0852	23.8876	21.1889	-0.177045	0.599165	-0.295486	0.767623	0.999994	-1.13057	NO	NO	NO	NO
dd_Smed_v6_104582_0_1	0	0	0	1	0	0	0	0	0	1.04206	0	0	0.173677	3.13559	4.76834	0.657585	0.510805	N/A	8.78834	NO	NO	8.78834	NO
dd_Smed_v6_10459_1_1	489	532	421	498	581	538	496.644	493.75	517.09	518.948	543.035	458.983	504.742	0.0125539	0.115239	0.108937	0.913252	0.999994	1.00874	NO	NO	NO	NO
dd_Smed_v6_1046_0_1	2324	2431	2000	2025	2205	2639	2360.33	2256.22	2456.48	2110.18	2060.92	2251.4	2249.25	-0.138017	0.067615	-2.04122	0.0412287	0.788367	-1.10039	NO	NO	NO	NO
dd_Smed_v6_10460_0_1	472	100	287	574	92	366	479.378	92.8102	352.505	598.145	85.9884	312.245	320.179	0.107749	0.741211	0.145368	0.88442	0.999994	1.07755	NO	NO	NO	NO
dd_Smed_v6_10460_0_2	240	660	257	255	678	329	243.752	612.547	315.658	265.726	633.697	280.679	392.01	0.00938463	0.471109	0.0199203	0.984107	0.999994	1.00653	NO	NO	NO	NO
dd_Smed_v6_104604_0_1	0	0	0	0	0	0	0	0	0	0	0	0	0	#N/A	N/A	N/A	N/A	N/A	#N/A	#N/A	#N/A	#N/A	#N/A
dd_Smed_v6_104605_0_1	0	0	0	0	0	0	0	0	0	0	0	0	0	#N/A	N/A	N/A	N/A	N/A	#N/A	#N/A	#N/A	#N/A	#N/A
dd_Smed_v6_104612_0_1	0	0	1	0	0	0	0	0	1.22824	0	0	0	0.204707	-3.51601	4.76036	-0.738603	0.460148	N/A	-11.44	-11.44	NO	NO	NO
dd_Smed_v6_10462_0_1	237	309	237	270	276	354	240.705	286.783	291.093	281.357	257.965	302.007	276.652	0.0410194	0.158079	0.259487	0.79526	0.999994	1.02884	NO	NO	NO	NO
dd_Smed_v6_104623_0_1	0	0	0	0	0	0	0	0	0	0	0	0	0	#N/A	N/A	N/A	N/A	N/A	#N/A	#N/A	#N/A	#N/A	#N/A
dd_Smed_v6_104627_0_1	0	0	0	0	0	0	0	0	0	0	0	0	0	#N/A	N/A	N/A	N/A	N/A	#N/A	#N/A	#N/A	#N/A	#N/A
dd_Smed_v6_10464_0_1	278	295	205	260	317	311	282.346	273.79	251.79	270.937	296.286	265.323	273.412	0.0412417	0.137426	0.300101	0.7641	0.999994	1.029	NO	NO	NO	NO
dd_Smed_v6_10464_0_2	0	0	0	0	2	0	0	0	0	0	1.86931	0	0.311552	4.01314	4.67553	0.858328	0.390711	N/A	16.1464	NO	NO	16.1464	NO
dd_Smed_v6_10465_0_2	129	140	96	125	137	138	131.017	129.934	117.911	130.258	128.048	117.732	125.817	-0.0145707	0.188282	-0.0773877	0.938315	0.999994	-1.01015	NO	NO	NO	NO
dd_Smed_v6_104650_0_1	0	0	0	0	0	0	0	0	0	0	0	0	0	#N/A	N/A	N/A	N/A	N/A	#N/A	#N/A	#N/A	#N/A	#N/A
dd_Smed_v6_104654_0_1	0	0	0	0	0	0	0	0	0	0	0	0	0	#N/A	N/A	N/A	N/A	N/A	#N/A	#N/A	#N/A	#N/A	#N/A
dd_Smed_v6_10466_0_1	15	5	8	4	11	4	15.2345	4.64051	9.82593	4.16826	10.2812	3.41251	7.92715	-0.73037	0.930854	-0.784623	0.432675	0.999994	-1.65906	-1.65906	NO	NO	NO
dd_Smed_v6_10466_0_2	55	69	52	61	62	83	55.8598	64.039	63.8686	63.5659	57.9487	70.8096	62.6819	0.067726	0.270415	0.250452	0.802238	0.999994	1.04806	NO	NO	NO	NO
dd_Smed_v6_10467_0_1	290	432	229	329	333	390	294.533	400.94	281.267	342.839	311.24	332.72	327.257	0.0118699	0.191706	0.061917	0.950629	0.999994	1.00826	NO	NO	NO	NO
dd_Smed_v6_10468_0_1	337	413	246	361	352	429	342.268	383.306	302.147	376.185	328.999	365.992	349.816	0.0565126	0.151618	0.37273	0.709349	0.999994	1.03995	NO	NO	NO	NO
dd_Smed_v6_10468_0_2	80	104	95	72	101	128	81.2506	96.5226	116.683	75.0287	94.4003	109.2	95.5142	-0.0732459	0.28579	-0.256293	0.797724	0.999994	-1.05208	NO	NO	NO	NO
dd_Smed_v6_10468_0_3	23	0	22	25	31	0	23.3595	0	27.0213	26.0516	28.9743	0	17.5678	0.128331	1.91671	0.0669539	0.946618	0.999994	1.09303	NO	NO	NO	NO
dd_Smed_v6_10468_0_4	0	28	0	0	0	28	0	25.9868	0	0	0	23.8876	8.3124	-0.122087	3.48963	-0.0349858	0.972091	0.999994	-1.08831	NO	NO	NO	NO
dd_Smed_v6_10468_0_5	17	16	17	17	28	18	17.2657	14.8496	20.8801	17.7151	26.1704	15.3563	18.7062	0.166783	0.521445	0.319849	0.749083	0.999994	1.12255	NO	NO	NO	NO
dd_Smed_v6_10468_0_8	5	13	2	12	16	7	5.07816	12.0653	2.45648	12.5048	14.9545	5.9719	8.83852	0.743806	0.923581	0.805351	0.420617	0.999994	1.67459	NO	NO	1.67459	NO
dd_Smed_v6_10469_0_1	216	236	218	245	252	329	219.377	219.032	267.757	255.306	235.533	280.679	246.281	0.131783	0.170661	0.772193	0.44	0.999994	1.09565	NO	NO	NO	NO
dd_Smed_v6_1047_0_1	2073	2070	1580	1646	2230	2613	2105.41	1921.17	1940.62	1715.24	2084.28	2229.22	1999.32	0.0153403	0.118115	0.129876	0.896665	0.999994	1.01069	NO	NO	NO	NO
dd_Smed_v6_10471_0_1	13	13	12	21	26	16	13.2032	12.0653	14.7389	21.8834	24.3011	13.65	16.6403	0.581004	0.54778	1.06065	0.288848	0.999994	1.49589	NO	NO	1.49589	NO
dd_Smed_v6_10471_0_2	129	156	93	108	102	116	131.017	144.784	114.226	112.543	95.3349	98.9628	116.145	-0.35177	0.217426	-1.61788	0.105688	0.999994	-1.27613	NO	NO	NO	NO
dd_Smed_v6_10472_0_1	450	451	321	370	523	535	457.034	418.574	394.266	385.564	488.825	456.423	433.448	0.0678079	0.147159	0.46078	0.644956	0.999994	1.04812	NO	NO	NO	NO
dd_Smed_v6_10473_0_1	212	181	157	150	184	189	215.314	167.986	192.834	156.31	171.977	161.241	177.61	-0.233332	0.183513	-1.27147	0.20356	0.999994	-1.17555	NO	NO	NO	NO
dd_Smed_v6_10474_0_1	0	0	0	0	65	0	0	0	0	0	60.7526	0	10.1254	9.03395	4.21173	2.14495	0.031957	0.705087	524.193	NO	NO	524.193	NO
dd_Smed_v6_10474_0_10	40	0	0	0	0	0	40.6253	0	0	0	0	0	6.77088	-8.61337	4.33899	-1.98511	0.0471321	0.825218	-391.635	-391.635	NO	NO	NO
dd_Smed_v6_10474_0_11	0	6	37	0	0	1	0	5.56861	45.4449	0	0	0.853128	8.64445	-5.82818	2.52956	-2.30403	0.0212211	0.562821	-56.8141	-56.8141	NO	NO	NO
dd_Smed_v6_10474_0_12	60	8	0	52	0	21	60.9379	7.42481	0	54.1874	0	17.9157	23.411	0.0747021	2.01908	0.036998	0.970487	0.999994	1.05314	NO	NO	NO	NO
dd_Smed_v6_10474_0_13	79	0	0	44	0	123	80.2349	0	0	45.8508	0	104.935	38.5034	0.910086	3.73038	0.243966	0.807257	0.999994	1.87916	NO	NO	1.87916	NO
dd_Smed_v6_10474_0_14	112	92	0	29	3	90	113.751	85.3854	0	30.2199	2.80397	76.7815	51.4903	-0.858972	1.55778	-0.551407	0.581354	0.999994	-1.81375	-1.81375	NO	NO	NO
dd_Smed_v6_10474_0_15	136	195	28	161	121	109	138.126	180.98	34.3908	167.772	113.093	92.9909	121.226	0.07694	0.607407	0.126669	0.899202	0.999994	1.05478	NO	NO	NO	NO
dd_Smed_v6_10474_0_16	0	206	225	163	284	150	0	191.189	276.354	169.857	265.442	127.969	171.802	0.268906	1.80033	0.149365	0.881266	0.999994	1.20489	NO	NO	NO	NO
dd_Smed_v6_10474_0_17	0	0	0	0	0	0	0	0	0	0	0	0	0	#N/A	N/A	N/A	N/A	N/A	#N/A	#N/A	#N/A	#N/A	#N/A
dd_Smed_v6_10474_0_18	0	0	0	0	0	0	0	0	0	0	0	0	0	#N/A	N/A	N/A	N/A	N/A	#N/A	#N/A	#N/A	#N/A	#N/A
dd_Smed_v6_10474_0_19	0	13	0	0	0	0	0	12.0653	0	0	0	0	2.01089	-6.86586	4.58197	-1.49845	0.134016	N/A	-116.636	-116.636	NO	NO	NO
dd_Smed_v6_10474_0_2	0	0	0	0	0	0	0	0	0	0	0	0	0	#N/A	N/A	N/A	N/A	N/A	#N/A	#N/A	#N/A	#N/A	#N/A
dd_Smed_v6_10474_0_20	0	2	0	10	0	0	0	1.8562	0	10.4206	0	0	2.04614	2.45914	3.85501	0.637908	0.523533	N/A	5.49889	NO	NO	5.49889	NO
dd_Smed_v6_10474_0_3	0	0	0	0	0	0	0	0	0	0	0	0	0	#N/A	N/A	N/A	N/A	N/A	#N/A	#N/A	#N/A	#N/A	#N/A
dd_Smed_v6_10474_0_4	0	0	23	0	0	0	0	0	28.2496	0	0	0	4.70826	-8.08606	4.54197	-1.7803	0.0750272	N/A	-271.735	-271.735	NO	NO	NO
dd_Smed_v6_10474_0_5	0	0	0	0	44	0	0	0	0	0	41.1249	0	6.85414	8.47104	4.36163	1.94217	0.0521162	0.857373	354.843	NO	NO	354.843	NO
dd_Smed_v6_10474_0_6	0	0	0	0	0	0	0	0	0	0	0	0	0	#N/A	N/A	N/A	N/A	N/A	#N/A	#N/A	#N/A	#N/A	#N/A
dd_Smed_v6_10474_0_7	0	0	0	0	0	0	0	0	0	0	0	0	0	#N/A	N/A	N/A	N/A	N/A	#N/A	#N/A	#N/A	#N/A	#N/A
dd_Smed_v6_10474_0_8	0	0	0	0	0	0	0	0	0	0	0	0	0	#N/A	N/A	N/A	N/A	N/A	#N/A	#N/A	#N/A	#N/A	#N/A
dd_Smed_v6_10474_0_9	0	12	56	0	0	3	0	11.1372	68.7815	0	0	2.55938	13.7464	-4.92814	2.29304	-2.14918	0.0316205	0.700584	-30.4451	-30.4451	NO	NO	NO
dd_Smed_v6_10476_1_1	0	0	0	1	0	1	0	0	0	1.04206	0	0.853128	0.315865	4.02876	4.67433	0.861891	0.388748	N/A	16.3221	NO	NO	16.3221	NO
dd_Smed_v6_10476_1_2	1	2	0	0	0	0	1.01563	1.8562	0	0	0	0	0.478639	-4.80372	4.64446	-1.03429	0.301	N/A	-27.9295	-27.9295	NO	NO	NO
dd_Smed_v6_10476_1_3	18	29	15	38	19	22	18.2814	26.915	18.4236	39.5985	17.7585	18.7688	23.2909	0.247356	0.57137	0.432917	0.665075	0.999994	1.18703	NO	NO	NO	NO
dd_Smed_v6_10477_0_1	36	51	33	39	26	25	36.5628	47.3332	40.532	40.6405	24.3011	21.3282	35.1163	-0.537627	0.437275	-1.22949	0.218887	0.999994	-1.45158	-1.45158	NO	NO	NO
dd_Smed_v6_10478_0_1	251	301	234	314	341	325	254.924	279.359	287.409	327.208	318.718	277.267	290.814	0.167404	0.145436	1.15104	0.249714	0.999994	1.12304	NO	NO	NO	NO
dd_Smed_v6_10479_0_1	280	342	215	285	299	294	284.377	317.411	264.072	296.988	279.462	250.82	282.188	-0.0699118	0.15483	-0.451538	0.651602	0.999994	-1.04965	NO	NO	NO	NO
dd_Smed_v6_1048_0_1	2593	3053	2235	2399	3080	3943	2633.53	2833.49	2745.12	2499.91	2878.74	3363.88	2825.78	0.0906937	0.120049	0.755471	0.449967	0.999994	1.06488	NO	NO	NO	NO
dd_Smed_v6_10480_0_1	159	157	144	143	207	239	161.485	145.712	176.867	149.015	193.474	203.898	171.742	0.17967	0.213425	0.841841	0.399877	0.999994	1.13262	NO	NO	NO	NO
dd_Smed_v6_10481_0_1	296	306	272	253	377	408	300.627	283.999	334.082	263.642	352.365	348.076	313.799	0.0729102	0.180475	0.403991	0.686219	0.999994	1.05184	NO	NO	NO	NO
dd_Smed_v6_10482_0_1	198	213	176	239	228	216	201.095	197.686	216.171	249.053	213.102	184.276	210.23	0.0707751	0.185936	0.380642	0.703469	0.999994	1.05028	NO	NO	NO	NO
dd_Smed_v6_10482_0_2	36	35	29	34	37	36	36.5628	32.4836	35.619	35.4302	34.5823	30.7126	34.2317	-0.0558528	0.348078	-0.160461	0.872518	0.999994	-1.03947	NO	NO	NO	NO
dd_Smed_v6_10482_0_3	0	0	0	0	0	0	0	0	0	0	0	0	0	#N/A	N/A	N/A	N/A	N/A	#N/A	#N/A	#N/A	#N/A	#N/A
dd_Smed_v6_10483_0_1	14	0	23	10	0	15	14.2188	0	28.2496	10.4206	0	12.7969	10.9477	-0.86688	1.91334	-0.453072	0.650497	0.999994	-1.82371	-1.82371	NO	NO	NO
dd_Smed_v6_10483_0_2	0	38	17	8	24	14	0	35.2679	20.8801	8.33652	22.4317	11.9438	16.4767	-0.394841	1.34622	-0.293297	0.769295	0.999994	-1.3148	NO	NO	NO	NO
dd_Smed_v6_10483_0_3	55	32	36	28	16	54	55.8598	29.6993	44.2167	29.1778	14.9545	46.0689	36.6628	-0.520134	0.574002	-0.906154	0.364855	0.999994	-1.43409	-1.43409	NO	NO	NO
dd_Smed_v6_10483_0_4	159	160	110	121	158	156	161.485	148.496	135.107	126.09	147.676	133.088	141.99	-0.13106	0.191145	-0.685655	0.49293	0.999994	-1.0951	NO	NO	NO	NO
dd_Smed_v6_10484_0_1	101	108	76	87	99	95	102.579	100.235	93.3464	90.6596	92.5309	81.0471	93.3997	-0.167908	0.217114	-0.773363	0.439307	0.999994	-1.12343	NO	NO	NO	NO
dd_Smed_v6_10485_0_1	389	373	262	391	316	431	395.081	346.182	321.799	407.447	295.351	367.698	355.593	0.00839831	0.183511	0.0457646	0.963498	0.999994	1.00584	NO	NO	NO	NO
dd_Smed_v6_10485_0_2	21	20	16	16	10	12	21.3283	18.562	19.6519	16.673	9.34656	10.2375	15.9666	-0.72433	0.54908	-1.31917	0.187112	0.999994	-1.65213	-1.65213	NO	NO	NO
dd_Smed_v6_10486_0_10	0	0	0	0	0	7	0	0	0	0	0	5.9719	0.995316	5.69343	4.59779	1.2383	0.215606	N/A	51.7478	NO	NO	51.7478	NO
dd_Smed_v6_10486_0_11	147	222	84	170	182	132	149.298	206.039	103.172	177.151	170.107	112.613	153.063	-0.000552136	0.35181	-0.00156942	0.998748	0.999994	-1.00038	NO	NO	NO	NO
dd_Smed_v6_10486_0_12	0	0	0	0	0	0	0	0	0	0	0	0	0	#N/A	N/A	N/A	N/A	N/A	#N/A	#N/A	#N/A	#N/A	#N/A
dd_Smed_v6_10486_0_13	26	0	0	0	0	0	26.4064	0	0	0	0	0	4.40107	-7.99204	4.55796	-1.75343	0.0795288	N/A	-254.591	-254.591	NO	NO	NO
dd_Smed_v6_10486_0_14	0	0	0	0	0	0	0	0	0	0	0	0	0	#N/A	N/A	N/A	N/A	N/A	#N/A	#N/A	#N/A	#N/A	#N/A
dd_Smed_v6_10486_0_15	0	0	0	0	0	31	0	0	0	0	0	26.447	4.40783	7.83548	4.57018	1.71448	0.0864411	N/A	228.409	NO	NO	228.409	NO
dd_Smed_v6_10486_0_16	0	39	0	0	17	36	0	36.196	0	0	15.8892	30.7126	13.7996	0.362552	2.56558	0.141314	0.887622	0.999994	1.2857	NO	NO	NO	NO
dd_Smed_v6_10486_0_17	0	0	0	0	78	0	0	0	0	0	72.9032	0	12.1505	9.29698	4.1534	2.2384	N/A	N/A	629.027	NO	NO	629.027	NO
dd_Smed_v6_10486_0_18	25	0	73	69	0	80	25.3908	0	89.6617	71.9025	0	68.2502	42.5342	0.286335	1.95436	0.146511	0.883518	0.999994	1.21954	NO	NO	NO	NO
dd_Smed_v6_10486_0_3	0	19	59	37	0	0	0	17.6339	72.4663	38.5564	0	0	21.4428	-1.22571	2.58092	-0.474914	0.634848	0.999994	-2.33871	-2.33871	NO	NO	NO
dd_Smed_v6_10486_0_4	0	13	0	0	0	0	0	12.0653	0	0	0	0	2.01089	-6.86586	4.58197	-1.49845	0.134016	N/A	-116.636	-116.636	NO	NO	NO
dd_Smed_v6_10486_0_5	118	34	17	0	69	0	119.845	31.5555	20.8801	0	64.4913	0	39.4619	-1.41765	1.93554	-0.732432	0.463905	0.999994	-2.6715	-2.6715	NO	NO	NO
dd_Smed_v6_10486_0_6	0	0	12	0	0	13	0	0	14.7389	0	0	11.0907	4.30493	-0.401437	3.66595	-0.109504	0.912803	N/A	-1.32082	NO	NO	NO	NO
dd_Smed_v6_10486_0_7	0	0	0	0	0	0	0	0	0	0	0	0	0	#N/A	N/A	N/A	N/A	N/A	#N/A	#N/A	#N/A	#N/A	#N/A
dd_Smed_v6_10486_0_8	46	0	0	7	0	23	46.7191	0	0	7.29445	0	19.6219	12.2726	-0.795032	2.63964	-0.30119	0.76327	0.999994	-1.73512	-1.73512	NO	NO	NO
dd_Smed_v6_10486_0_9	0	0	0	0	0	0	0	0	0	0	0	0	0	#N/A	N/A	N/A	N/A	N/A	#N/A	#N/A	#N/A	#N/A	#N/A
dd_Smed_v6_10487_0_2	0	0	0	4	0	0	0	0	0	4.16826	0	0	0.69471	5.15882	4.61372	1.11815	0.263504	N/A	35.7239	NO	NO	35.7239	NO
dd_Smed_v6_10487_0_3	48	68	54	63	75	110	48.7503	63.1109	66.3251	65.6501	70.0992	93.8441	67.9633	0.370869	0.312293	1.18757	0.235004	0.999994	1.29313	NO	NO	NO	NO
dd_Smed_v6_10489_0_1	38	36	13	24	27	15	38.594	33.4117	15.9671	25.0096	25.2357	12.7969	25.1692	-0.492689	0.587325	-0.838868	0.401543	0.999994	-1.40706	-1.40706	NO	NO	NO
dd_Smed_v6_10489_0_2	155	178	159	158	178	207	157.423	165.202	195.29	164.646	166.369	176.597	170.921	-0.0244317	0.177958	-0.137289	0.890802	0.999994	-1.01708	NO	NO	NO	NO
dd_Smed_v6_1049_0_1	814	895	633	701	795	927	826.725	830.651	777.477	730.487	743.052	790.85	783.207	-0.105029	0.0850185	-1.23537	0.216693	0.999994	-1.07552	NO	NO	NO	NO
dd_Smed_v6_10490_0_1	245	248	206	235	240	254	248.83	230.169	253.018	244.885	224.317	216.694	236.319	-0.0938857	0.144722	-0.648729	0.516513	0.999994	-1.06724	NO	NO	NO	NO
dd_Smed_v6_10491_0_1	19	19	24	31	34	18	19.297	17.6339	29.4778	32.304	31.7783	15.3563	24.3079	0.261992	0.54871	0.477469	0.633029	0.999994	1.19913	NO	NO	NO	NO
dd_Smed_v6_10491_1_1	0	34	44	41	36	36	0	31.5555	54.0426	42.7247	33.6476	30.7126	32.1138	0.325395	1.25267	0.259762	0.795048	0.999994	1.25301	NO	NO	NO	NO
dd_Smed_v6_10491_1_2	223	209	140	185	207	259	226.486	193.973	171.954	192.782	193.474	220.96	199.938	0.0344217	0.187229	0.183848	0.854133	0.999994	1.02415	NO	NO	NO	NO
dd_Smed_v6_10493_0_1	429	480	299	470	423	466	435.706	445.489	367.244	489.77	395.36	397.558	421.854	0.035789	0.159153	0.224872	0.822079	0.999994	1.02512	NO	NO	NO	NO
dd_Smed_v6_10495_0_1	61	96	75	86	66	60	61.9536	89.0978	92.1181	89.6176	61.6873	51.1877	74.277	-0.267011	0.359719	-0.742278	0.457919	0.999994	-1.20331	NO	NO	NO	NO
dd_Smed_v6_10495_0_2	88	84	46	72	110	117	89.3756	77.9605	56.4991	75.0287	102.812	99.816	83.582	0.30797	0.307497	1.00154	0.316567	0.999994	1.23796	NO	NO	NO	NO
dd_Smed_v6_10497_0_1	265	313	274	280	342	420	269.142	290.496	336.538	291.778	319.652	358.314	310.987	0.117636	0.165014	0.712887	0.475916	0.999994	1.08496	NO	NO	NO	NO
dd_Smed_v6_10498_0_1	361	393	305	353	451	465	366.643	364.744	374.614	367.849	421.53	396.704	382.014	0.102369	0.116745	0.876859	0.380563	0.999994	1.07353	NO	NO	NO	NO
dd_Smed_v6_10498_0_2	32	38	0	14	11	13	32.5002	35.2679	0	14.5889	10.2812	11.0907	17.2881	-0.91991	1.27971	-0.718844	0.472237	0.999994	-1.892	-1.892	NO	NO	NO
dd_Smed_v6_10498_0_3	0	1	1	0	4	1	0	0.928102	1.22824	0	3.73862	0.853128	1.12468	1.11352	2.41324	0.461421	0.644496	N/A	2.16373	NO	NO	2.16373	NO
dd_Smed_v6_10498_0_4	6	28	14	26	5	25	6.09379	25.9868	17.1954	27.0937	4.67328	21.3282	17.0619	0.103863	0.913452	0.113704	0.909473	0.999994	1.07465	NO	NO	NO	NO
dd_Smed_v6_10499_0_1	682	664	537	646	696	638	692.661	616.26	659.566	673.174	650.521	544.296	639.413	-0.0764406	0.128419	-0.595245	0.55168	0.999994	-1.05441	NO	NO	NO	NO
dd_Smed_v6_105_0_1	8112	8672	6666	6986	6583	7823	8238.81	8048.5	8187.46	7279.86	6152.84	6674.02	7430.25	-0.283771	0.0716526	-3.96038	7.48308e-05	0.0163451	-1.21737	NO	NO	NO	NO
dd_Smed_v6_1050_0_1	2994	3434	2575	2776	3043	3952	3040.8	3187.1	3162.72	2892.77	2844.16	3371.56	3083.19	-0.0435718	0.085934	-0.507038	0.612128	0.999994	-1.03066	NO	NO	NO	NO
dd_Smed_v6_10500_0_1	96	120	93	129	120	108	97.5007	111.372	114.226	134.426	112.159	92.1378	110.304	0.0656254	0.249367	0.263168	0.792421	0.999994	1.04654	NO	NO	NO	NO
dd_Smed_v6_10501_0_1	65	85	79	82	87	96	66.0161	78.8886	97.0311	85.4493	81.3151	81.9003	81.7667	0.0442207	0.263915	0.167557	0.866932	0.999994	1.03113	NO	NO	NO	NO
dd_Smed_v6_10502_0_1	21	21	14	15	16	15	21.3283	19.4901	17.1954	15.631	14.9545	12.7969	16.8994	-0.425996	0.494725	-0.861076	0.389196	0.999994	-1.3435	NO	NO	NO	NO
dd_Smed_v6_10504_0_1	445	104	0	0	94	403	451.956	96.5226	0	0	87.8577	343.811	163.358	-0.345432	2.96538	-0.116488	0.907265	0.999994	-1.27053	NO	NO	NO	NO
dd_Smed_v6_10504_0_2	223	625	528	619	700	324	226.486	580.064	648.512	645.038	654.259	276.413	505.129	0.114898	0.468328	0.245337	0.806195	0.999994	1.0829	NO	NO	NO	NO
dd_Smed_v6_10506_0_1	224	233	193	226	286	312	227.502	216.248	237.051	235.507	267.312	266.176	241.632	0.179062	0.145065	1.23436	0.21707	0.999994	1.13215	NO	NO	NO	NO
dd_Smed_v6_10507_0_1	26	32	22	23	16	20	26.4064	29.6993	27.0213	23.9675	14.9545	17.0626	23.1853	-0.577923	0.452379	-1.27752	0.20142	0.999994	-1.4927	-1.4927	NO	NO	NO
dd_Smed_v6_10508_0_1	249	269	183	254	254	305	252.892	249.659	224.768	264.684	237.403	260.204	248.269	0.0651364	0.143462	0.454033	0.649805	0.999994	1.04618	NO	NO	NO	NO
dd_Smed_v6_10509_0_1	434	459	393	442	512	534	440.784	425.999	482.699	460.593	478.544	455.57	457.365	0.0499328	0.108428	0.460518	0.645144	0.999994	1.03522	NO	NO	NO	NO
dd_Smed_v6_1051_0_1	866	978	689	807	662	767	879.537	907.683	846.259	840.946	618.742	654.349	791.253	-0.318486	0.147639	-2.1572	0.0309902	0.695105	-1.24702	NO	NO	NO	NO
dd_Smed_v6_10510_0_1	285	341	254	311	322	336	289.455	316.483	311.973	324.082	300.959	286.651	304.934	-0.0112335	0.130285	-0.0862225	0.93129	0.999994	-1.00782	NO	NO	NO	NO
dd_Smed_v6_10510_0_2	17	8	0	12	21	21	17.2657	7.42481	0	12.5048	19.6278	17.9157	12.4565	1.00892	1.16384	0.866888	0.386004	0.999994	2.0124	NO	NO	2.0124	NO
dd_Smed_v6_10511_0_1	129	159	168	132	201	206	131.017	147.568	206.345	137.553	187.866	175.744	164.349	0.0525057	0.26927	0.194993	0.845398	0.999994	1.03706	NO	NO	NO	NO
dd_Smed_v6_10511_0_2	13	12	7	17	8	12	13.2032	11.1372	8.59769	17.7151	7.47725	10.2375	11.3947	0.091562	0.685595	0.133551	0.893757	0.999994	1.06552	NO	NO	NO	NO
dd_Smed_v6_10512_1_6	1	0	0	1	0	0	1.01563	0	0	1.04206	0	0	0.342949	-0.00826442	4.23567	-0.00195115	0.998443	N/A	-1.00574	NO	NO	NO	NO
dd_Smed_v6_10512_1_7	3	5	1	5	1	2	3.0469	4.64051	1.22824	5.21032	0.934656	1.70626	2.79448	-0.223099	1.3498	-0.165284	0.868721	N/A	-1.16724	NO	NO	NO	NO
dd_Smed_v6_10513_0_1	67	68	71	61	76	99	68.0473	63.1109	87.2052	63.5659	71.0339	84.4597	72.9038	0.0132818	0.28946	0.0458846	0.963402	0.999994	1.00925	NO	NO	NO	NO
dd_Smed_v6_10514_0_1	176	181	142	136	188	228	178.751	167.986	174.41	141.721	175.715	194.513	172.183	-0.022369	0.198276	-0.112818	0.910175	0.999994	-1.01563	NO	NO	NO	NO
dd_Smed_v6_10515_0_1	213	236	151	207	222	232	216.33	219.032	185.465	215.707	207.494	197.926	206.992	-0.00370046	0.158727	-0.0233134	0.9814	0.999994	-1.00257	NO	NO	NO	NO
dd_Smed_v6_10516_0_1	124	148	115	114	138	160	125.938	137.359	141.248	118.795	128.983	136.5	131.471	-0.0710948	0.187999	-0.378165	0.705308	0.999994	-1.05051	NO	NO	NO	NO
dd_Smed_v6_10517_0_1	281	318	248	265	324	414	285.393	295.136	304.604	276.147	302.829	353.195	302.884	0.0774344	0.154401	0.501516	0.616008	0.999994	1.05514	NO	NO	NO	NO
dd_Smed_v6_10518_0_1	18	15	2	4	3	14	18.2814	13.9215	2.45648	4.16826	2.80397	11.9438	8.92923	-0.87339	1.08351	-0.806075	0.4202	0.999994	-1.83196	-1.83196	NO	NO	NO
dd_Smed_v6_10518_0_2	338	365	256	286	339	347	343.284	338.757	314.43	298.03	316.848	296.035	317.897	-0.131252	0.121942	-1.07636	0.281768	0.999994	-1.09524	NO	NO	NO	NO
dd_Smed_v6_10518_0_3	35	43	34	33	33	54	35.5471	39.9084	41.7602	34.3881	30.8436	46.0689	38.0861	-0.0694114	0.366446	-0.189418	0.849765	0.999994	-1.04929	NO	NO	NO	NO
dd_Smed_v6_10519_0_1	54	61	52	53	60	62	54.8441	56.6142	63.8686	55.2294	56.0794	52.8939	56.5883	-0.0918628	0.272811	-0.336727	0.736323	0.999994	-1.06575	NO	NO	NO	NO
dd_Smed_v6_1052_0_1	3026	3046	2614	2699	3679	4248	3073.3	2827	3210.62	2812.53	3438.6	3624.09	3164.36	0.11688	0.115258	1.01408	0.310545	0.999994	1.08439	NO	NO	NO	NO
dd_Smed_v6_10520_0_1	34	45	29	50	37	33	34.5315	41.7646	35.619	52.1032	34.5823	28.1532	37.7923	0.0288787	0.413544	0.0698323	0.944327	0.999994	1.02022	NO	NO	NO	NO
dd_Smed_v6_10521_0_1	317	403	325	359	439	470	321.955	374.025	399.179	374.101	410.314	400.97	380.091	0.116449	0.138118	0.843111	0.399167	0.999994	1.08406	NO	NO	NO	NO
dd_Smed_v6_10522_0_1	490	519	406	493	603	650	497.66	481.685	498.666	513.738	563.598	554.533	518.313	0.14446	0.0982809	1.46987	0.141598	0.999994	1.10532	NO	NO	NO	NO
dd_Smed_v6_10523_0_1	380	400	228	368	331	335	385.94	371.241	280.039	383.48	309.371	285.798	335.978	-0.0873338	0.206773	-0.422366	0.672758	0.999994	-1.0624	NO	NO	NO	NO
dd_Smed_v6_10524_0_1	83	101	51	93	74	95	84.2975	93.7383	62.6403	96.912	69.1645	81.0471	81.3	0.0307895	0.299527	0.102794	0.918127	0.999994	1.02157	NO	NO	NO	NO
dd_Smed_v6_10525_0_1	208	183	134	189	242	271	211.251	169.843	164.584	196.95	226.187	231.198	200.002	0.261954	0.189105	1.38523	0.165982	0.999994	1.1991	NO	NO	NO	NO
dd_Smed_v6_10526_0_1	374	444	317	394	397	411	379.846	412.077	389.353	410.573	371.058	350.636	385.591	-0.0635712	0.124852	-0.509173	0.610631	0.999994	-1.04505	NO	NO	NO	NO
dd_Smed_v6_10527_0_1	98	120	110	91	99	107	99.5319	111.372	135.107	94.8279	92.5309	91.2847	104.109	-0.308598	0.229857	-1.34257	0.179413	0.999994	-1.2385	NO	NO	NO	NO
dd_Smed_v6_10529_0_1	234	241	202	194	249	255	237.658	223.673	248.105	202.161	232.729	217.548	226.979	-0.117902	0.149084	-0.790843	0.429036	0.999994	-1.08516	NO	NO	NO	NO
dd_Smed_v6_1053_0_1	4175	4399	3220	3892	4300	5707	4240.26	4082.72	3954.94	4055.72	4019.02	4868.8	4203.58	0.0763373	0.0935922	0.815637	0.414708	0.999994	1.05434	NO	NO	NO	NO
dd_Smed_v6_10530_0_1	461	479	385	470	451	412	468.206	444.561	472.873	489.77	421.53	351.489	441.405	-0.135348	0.162565	-0.832576	0.405084	0.999994	-1.09836	NO	NO	NO	NO
dd_Smed_v6_10530_0_2	4	2	0	0	26	17	4.06253	1.8562	0	0	24.3011	14.5032	7.45383	2.69699	1.86048	1.44962	0.147163	0.999994	6.48447	NO	NO	6.48447	NO
dd_Smed_v6_10531_0_1	44	48	45	57	51	70	44.6878	44.5489	55.2709	59.3977	47.6675	59.719	51.8819	0.211968	0.307688	0.688905	0.490883	0.999994	1.15827	NO	NO	NO	NO
dd_Smed_v6_10532_0_1	681	887	558	772	826	807	691.645	823.226	685.359	804.474	772.026	688.474	744.201	0.0396849	0.127273	0.31181	0.755185	0.999994	1.02789	NO	NO	NO	NO
dd_Smed_v6_10533_0_1	27	33	23	23	29	24	27.4221	30.6274	28.2496	23.9675	27.105	20.4751	26.3078	-0.273938	0.403762	-0.678466	0.497476	0.999994	-1.2091	NO	NO	NO	NO
dd_Smed_v6_10534_0_1	145	134	137	152	187	228	147.267	124.366	168.269	158.394	174.781	194.513	161.265	0.268603	0.211175	1.27194	0.203393	0.999994	1.20464	NO	NO	NO	NO
dd_Smed_v6_10535_0_1	20	34	26	31	27	30	20.3126	31.5555	31.9343	32.304	25.2357	25.5938	27.8227	-0.012458	0.431975	-0.0288396	0.976992	0.999994	-1.00867	NO	NO	NO	NO
dd_Smed_v6_10536_0_1	57	75	67	66	67	50	57.891	69.6076	82.2922	68.7763	62.622	42.6564	63.9742	-0.270436	0.340222	-0.794881	0.426683	0.999994	-1.20617	NO	NO	NO	NO
dd_Smed_v6_10539_0_1	103	87	88	86	98	135	104.61	80.7449	108.085	89.6176	91.5963	115.172	98.3044	0.0205551	0.259806	0.0791171	0.93694	0.999994	1.01435	NO	NO	NO	NO
dd_Smed_v6_1054_0_1	9104	8801	7778	8878	9184	9087	9246.31	8168.22	9553.26	9251.45	8583.88	7752.37	8759.25	-0.0757535	0.0926379	-0.817738	0.413507	0.999994	-1.05391	NO	NO	NO	NO
dd_Smed_v6_10540_0_1	414	456	337	508	534	505	420.472	423.214	413.917	529.369	499.106	430.83	452.818	0.212647	0.127669	1.66562	0.0957897	0.999994	1.15881	NO	NO	NO	NO
dd_Smed_v6_10541_0_1	93	96	84	69	79	105	94.4538	89.0978	103.172	71.9025	73.8378	89.5784	87.0071	-0.279293	0.240411	-1.16173	0.245345	0.999994	-1.2136	NO	NO	NO	NO
dd_Smed_v6_10542_0_1	188	221	172	192	216	251	190.939	205.11	211.258	200.076	201.886	214.135	203.901	0.0227943	0.148768	0.15322	0.878224	0.999994	1.01593	NO	NO	NO	NO
dd_Smed_v6_10542_0_2	5	12	2	1	1	9	5.07816	11.1372	2.45648	1.04206	0.934656	7.67815	4.72112	-0.943565	1.34059	-0.703843	0.481531	N/A	-1.92327	-1.92327	NO	NO	NO
dd_Smed_v6_10543_0_1	218	211	191	204	271	283	221.408	195.829	234.594	212.581	253.292	241.435	226.523	0.121905	0.166208	0.733449	0.463284	0.999994	1.08817	NO	NO	NO	NO
dd_Smed_v6_10544_0_1	349	342	235	336	404	343	354.456	317.411	288.637	350.134	377.601	292.623	330.143	0.08481	0.170434	0.497613	0.618757	0.999994	1.06055	NO	NO	NO	NO
dd_Smed_v6_10545_0_1	69	78	51	78	79	94	70.0786	72.3919	62.6403	81.281	73.8378	80.194	73.404	0.194335	0.24317	0.799173	0.42419	0.999994	1.1442	NO	NO	NO	NO
dd_Smed_v6_10546_0_1	221	190	174	176	218	281	224.455	176.339	213.714	183.403	203.755	239.729	206.899	0.0324955	0.20112	0.161573	0.871642	0.999994	1.02278	NO	NO	NO	NO
dd_Smed_v6_10547_0_1	222	226	202	185	266	318	225.47	209.751	248.105	192.782	248.619	271.295	232.67	0.06482	0.200098	0.323941	0.745983	0.999994	1.04595	NO	NO	NO	NO
dd_Smed_v6_10548_0_1	4	5	3	14	4	7	4.06253	4.64051	3.68473	14.5889	3.73862	5.9719	6.11453	0.956477	0.973264	0.982753	0.325729	0.999994	1.94057	NO	NO	1.94057	NO
dd_Smed_v6_1055_0_1	1106	1185	933	1150	1164	1232	1123.29	1099.8	1145.95	1198.37	1087.94	1051.05	1117.73	-0.0142127	0.0838685	-0.169465	0.865431	0.999994	-1.0099	NO	NO	NO	NO
dd_Smed_v6_10551_0_1	192	209	164	180	218	227	195.001	193.973	201.432	187.572	203.755	193.66	195.899	-0.0118317	0.147909	-0.0799929	0.936243	0.999994	-1.00823	NO	NO	NO	NO
dd_Smed_v6_10552_0_1	8	6	4	11	6	13	8.12506	5.56861	4.91297	11.4627	5.60794	11.0907	7.79466	0.59161	0.785139	0.75351	0.451143	0.999994	1.50693	NO	NO	1.50693	NO
dd_Smed_v6_10552_0_2	0	0	0	0	0	0	0	0	0	0	0	0	0	#N/A	N/A	N/A	N/A	N/A	#N/A	#N/A	#N/A	#N/A	#N/A
dd_Smed_v6_10552_0_3	1	2	0	5	4	2	1.01563	1.8562	0	5.21032	3.73862	1.70626	2.25451	1.82019	1.57494	1.15572	0.247795	N/A	3.53128	NO	NO	3.53128	NO
dd_Smed_v6_10552_0_4	4	2	3	4	2	2	4.06253	1.8562	3.68473	4.16826	1.86931	1.70626	2.89121	-0.31677	1.1956	-0.264947	0.791051	N/A	-1.24554	NO	NO	NO	NO
dd_Smed_v6_10553_0_10	5	1	1	2	1	2	5.07816	0.928102	1.22824	2.08413	0.934656	1.70626	1.99326	-0.624949	1.50808	-0.414402	0.67858	N/A	-1.54216	-1.54216	NO	NO	NO
dd_Smed_v6_10553_0_14	0	5	1	0	0	0	0	4.64051	1.22824	0	0	0	0.978125	-5.82789	4.17967	-1.39434	0.163215	N/A	-56.8028	-56.8028	NO	NO	NO
dd_Smed_v6_10553_0_16	0	0	0	0	0	0	0	0	0	0	0	0	0	#N/A	N/A	N/A	N/A	N/A	#N/A	#N/A	#N/A	#N/A	#N/A
dd_Smed_v6_10553_0_17	0	0	0	0	0	0	0	0	0	0	0	0	0	#N/A	N/A	N/A	N/A	N/A	#N/A	#N/A	#N/A	#N/A	#N/A
dd_Smed_v6_10553_0_2	15	31	16	27	13	26	15.2345	28.7712	19.6519	28.1357	12.1505	22.1813	21.0209	-0.0344921	0.586272	-0.0588328	0.953085	0.999994	-1.0242	NO	NO	NO	NO
dd_Smed_v6_10553_0_20	1	0	0	1	0	0	1.01563	0	0	1.04206	0	0	0.342949	-0.00826442	4.23567	-0.00195115	0.998443	N/A	-1.00574	NO	NO	NO	NO
dd_Smed_v6_10553_0_23	0	10	0	0	2	0	0	9.28102	0	0	1.86931	0	1.85839	-2.31599	3.87971	-0.596949	0.550542	N/A	-4.97946	-4.97946	NO	NO	NO
dd_Smed_v6_10553_0_25	1	2	3	2	0	0	1.01563	1.8562	3.68473	2.08413	0	0	1.44012	-1.69653	2.18764	-0.775508	0.43804	N/A	-3.2412	-3.2412	NO	NO	NO
dd_Smed_v6_10553_0_26	0	0	1	1	0	0	0	0	1.22824	1.04206	0	0	0.378384	-0.220848	4.20098	-0.0525705	0.958074	N/A	-1.16542	NO	NO	NO	NO
dd_Smed_v6_10553_0_3	12	0	0	0	14	5	12.1876	0	0	0	13.0852	4.26564	4.92307	0.508181	2.6593	0.191096	0.848451	N/A	1.42226	NO	NO	1.42226	NO
dd_Smed_v6_10553_0_39	0	2	2	0	0	1	0	1.8562	2.45648	0	0	0.853128	0.860969	-2.27658	3.08956	-0.736864	0.461205	N/A	-4.84528	-4.84528	NO	NO	NO
dd_Smed_v6_10553_0_42	1	4	3	2	1	4	1.01563	3.71241	3.68473	2.08413	0.934656	3.41251	2.47401	-0.37399	1.34504	-0.278051	0.780974	N/A	-1.29593	NO	NO	NO	NO
dd_Smed_v6_10553_0_5	14	19	4	12	10	7	14.2188	17.6339	4.91297	12.5048	9.34656	5.9719	10.7648	-0.423726	0.794925	-0.53304	0.594006	0.999994	-1.34139	NO	NO	NO	NO
dd_Smed_v6_10553_0_6	1	1	8	2	1	1	1.01563	0.928102	9.82593	2.08413	0.934656	0.853128	2.60693	-1.59168	1.63262	-0.974926	0.329597	N/A	-3.014	-3.014	NO	NO	NO
dd_Smed_v6_10553_0_7	0	0	0	0	0	0	0	0	0	0	0	0	0	#N/A	N/A	N/A	N/A	N/A	#N/A	#N/A	#N/A	#N/A	#N/A
dd_Smed_v6_10553_0_8	4	0	0	5	0	0	4.06253	0	0	5.21032	0	0	1.54548	0.347157	3.84625	0.0902585	0.928082	N/A	1.27205	NO	NO	NO	NO
dd_Smed_v6_10554_0_1	20	34	20	25	23	28	20.3126	31.5555	24.5648	26.0516	21.4971	23.8876	24.6449	-0.102858	0.439346	-0.234116	0.814895	0.999994	-1.0739	NO	NO	NO	NO
dd_Smed_v6_10555_0_1	395	393	258	425	348	328	401.175	364.744	316.886	442.877	325.26	279.826	355.128	-0.0498217	0.226448	-0.220014	0.82586	0.999994	-1.03514	NO	NO	NO	NO
dd_Smed_v6_10556_0_1	36	35	24	24	42	36	36.5628	32.4836	29.4778	25.0096	39.2556	30.7126	32.2503	-0.0528113	0.397175	-0.132967	0.894219	0.999994	-1.03728	NO	NO	NO	NO
dd_Smed_v6_10557_0_1	62	84	76	61	57	92	62.9692	77.9605	93.3464	63.5659	53.2754	78.4878	71.6009	-0.256843	0.317566	-0.808789	0.418637	0.999994	-1.19486	NO	NO	NO	NO
dd_Smed_v6_10557_0_2	90	126	92	104	98	96	91.4069	116.941	112.998	108.375	91.5963	81.9003	100.536	-0.191862	0.248908	-0.770816	0.440816	0.999994	-1.14224	NO	NO	NO	NO
dd_Smed_v6_10558_1_1	11	0	14	12	21	20	11.172	0	17.1954	12.5048	19.6278	17.0626	12.9271	0.807299	1.22	0.661722	0.50815	0.999994	1.74993	NO	NO	1.74993	NO
dd_Smed_v6_10558_1_2	142	142	82	146	151	164	144.22	131.79	100.716	152.141	141.133	139.913	134.986	0.195934	0.221953	0.882773	0.377359	0.999994	1.14547	NO	NO	NO	NO
dd_Smed_v6_1056_0_1	709	737	537	598	600	719	720.083	684.011	659.566	623.155	560.794	613.399	643.501	-0.200409	0.0977152	-2.05095	0.0402714	0.784323	-1.14902	NO	NO	NO	NO
dd_Smed_v6_10560_0_1	106	123	90	94	108	122	107.657	114.157	110.542	97.9541	100.943	104.082	105.889	-0.133042	0.197492	-0.67366	0.500528	0.999994	-1.0966	NO	NO	NO	NO
dd_Smed_v6_10561_0_1	83	50	21	55	88	136	84.2975	46.4051	25.7931	57.3136	82.2497	116.025	68.6807	0.705398	0.545903	1.29217	0.196299	0.999994	1.63059	NO	NO	1.63059	NO
dd_Smed_v6_10561_0_2	0	70	32	0	0	0	0	64.9671	39.3037	0	0	0	17.3785	-9.97307	3.2391	-3.07897	0.00207721	0.150812	-1005.06	-1005.06	NO	NO	NO
dd_Smed_v6_10561_0_3	16	67	74	10	14	13	16.2501	62.1828	90.8899	10.4206	13.0852	11.0907	33.9866	-2.28748	0.730701	-3.13052	0.00174494	0.132824	-4.88202	-4.88202	NO	NO	NO
dd_Smed_v6_10561_0_4	71	0	20	107	115	123	72.1099	0	24.5648	111.501	107.485	104.935	70.0993	1.74493	1.20968	1.44247	0.149168	0.999994	3.3518	NO	NO	3.3518	NO
dd_Smed_v6_10562_0_1	326	280	243	282	291	269	331.096	259.868	298.463	293.862	271.985	229.491	280.794	-0.162183	0.181754	-0.892321	0.372221	0.999994	-1.11898	NO	NO	NO	NO
dd_Smed_v6_10564_0_1	218	261	219	214	233	263	221.408	242.235	268.985	223.002	217.775	224.373	232.963	-0.136771	0.151376	-0.903519	0.366251	0.999994	-1.09944	NO	NO	NO	NO
dd_Smed_v6_10565_0_1	241	277	199	271	297	280	244.767	257.084	244.42	282.4	277.593	238.876	257.523	0.0956587	0.146543	0.652767	0.513907	0.999994	1.06855	NO	NO	NO	NO
dd_Smed_v6_10565_0_2	42	7	14	0	40	0	42.6565	6.49671	17.1954	0	37.3862	0	17.2891	-0.827094	1.99157	-0.415297	0.677924	0.999994	-1.77411	-1.77411	NO	NO	NO
dd_Smed_v6_10565_0_3	0	0	0	0	0	0	0	0	0	0	0	0	0	#N/A	N/A	N/A	N/A	N/A	#N/A	#N/A	#N/A	#N/A	#N/A
dd_Smed_v6_10565_0_4	28	28	19	28	24	32	28.4377	25.9868	23.3366	29.1778	22.4317	27.3001	26.1118	0.0167598	0.407595	0.0411188	0.967201	0.999994	1.01168	NO	NO	NO	NO
dd_Smed_v6_10566_0_1	259	302	195	234	272	329	263.049	280.287	239.507	243.843	254.226	280.679	260.265	-0.00869979	0.149699	-0.0581151	0.953657	0.999994	-1.00605	NO	NO	NO	NO
dd_Smed_v6_10566_0_2	66	64	55	36	56	96	67.0317	59.3985	67.5533	37.5143	52.3407	81.9003	60.9565	-0.169209	0.397783	-0.42538	0.670559	0.999994	-1.12444	NO	NO	NO	NO
dd_Smed_v6_10567_0_1	481	471	381	419	517	595	488.519	437.136	467.96	436.625	483.217	507.611	470.178	0.0367114	0.119446	0.307347	0.758579	0.999994	1.02577	NO	NO	NO	NO
dd_Smed_v6_10568_0_1	183	261	165	230	257	284	185.861	242.235	202.66	239.675	240.207	242.288	225.487	0.193093	0.170262	1.13409	0.256757	0.999994	1.14321	NO	NO	NO	NO
dd_Smed_v6_10569_0_1	210	218	160	184	193	242	213.283	202.326	196.519	191.74	180.389	206.457	198.452	-0.081271	0.155259	-0.523455	0.600657	0.999994	-1.05795	NO	NO	NO	NO
dd_Smed_v6_1057_0_1	1872	1992	1717	1413	1952	2188	1901.26	1848.78	2108.89	1472.44	1824.45	1866.64	1837.08	-0.181179	0.120671	-1.50143	0.133245	0.999994	-1.13381	NO	NO	NO	NO
dd_Smed_v6_10570_0_1	161	181	154	141	176	147	163.517	167.986	189.149	146.931	164.499	125.41	159.582	-0.252553	0.199642	-1.26503	0.205859	0.999994	-1.19131	NO	NO	NO	NO
dd_Smed_v6_10571_0_1	66	72	49	59	66	57	67.0317	66.8233	60.1838	61.4818	61.6873	48.6283	60.9727	-0.18098	0.278927	-0.648845	0.516439	0.999994	-1.13365	NO	NO	NO	NO
dd_Smed_v6_10573_0_1	96	130	114	132	111	117	97.5007	120.653	140.02	137.553	103.747	99.816	116.548	-0.0703417	0.268726	-0.26176	0.793506	0.999994	-1.04997	NO	NO	NO	NO
dd_Smed_v6_10574_0_1	88	109	76	84	87	91	89.3756	101.163	93.3464	87.5334	81.3151	77.6346	88.3947	-0.206975	0.223135	-0.927575	0.353628	0.999994	-1.15427	NO	NO	NO	NO
dd_Smed_v6_10575_0_1	296	343	292	347	363	477	300.627	318.339	358.647	361.596	339.28	406.942	347.572	0.183383	0.148134	1.23795	0.215734	0.999994	1.13554	NO	NO	NO	NO
dd_Smed_v6_10576_0_1	184	229	169	190	152	245	186.876	212.535	207.573	197.992	142.068	209.016	192.677	-0.144361	0.220797	-0.653816	0.51323	0.999994	-1.10524	NO	NO	NO	NO
dd_Smed_v6_10577_0_1	328	347	257	276	343	397	333.127	322.051	315.658	287.61	320.587	338.692	319.621	-0.0346735	0.131385	-0.263907	0.791852	0.999994	-1.02432	NO	NO	NO	NO
dd_Smed_v6_10578_0_1	33	35	30	51	37	46	33.5159	32.4836	36.8473	53.1453	34.5823	39.2439	38.303	0.302782	0.369698	0.818998	0.412787	0.999994	1.23352	NO	NO	NO	NO
dd_Smed_v6_10579_0_1	91	97	99	94	108	127	92.4225	90.0259	121.596	97.9541	100.943	108.347	101.881	0.0220841	0.238517	0.0925892	0.92623	0.999994	1.01543	NO	NO	NO	NO
dd_Smed_v6_1058_0_1	1088	1185	916	919	1295	1423	1105.01	1099.8	1125.07	957.657	1210.38	1214	1118.65	0.0234855	0.120803	0.194412	0.845854	0.999994	1.01641	NO	NO	NO	NO
dd_Smed_v6_10581_0_1	179	238	176	194	248	249	181.798	220.888	216.171	202.161	231.795	212.429	210.873	0.0637551	0.169075	0.377081	0.706114	0.999994	1.04518	NO	NO	NO	NO
dd_Smed_v6_10582_0_1	312	324	238	332	342	389	316.877	300.705	292.322	345.965	319.652	331.867	317.898	0.131001	0.121167	1.08117	0.279623	0.999994	1.09505	NO	NO	NO	NO
dd_Smed_v6_10583_0_1	56	66	82	53	82	116	56.8754	61.2547	100.716	55.2294	76.6418	98.9628	74.9467	0.0852525	0.399128	0.213597	0.830861	0.999994	1.06087	NO	NO	NO	NO
dd_Smed_v6_10583_0_2	19	0	0	0	15	0	19.297	0	0	0	14.0198	0	5.55281	-0.461605	3.58887	-0.128621	0.897657	0.999994	-1.37707	NO	NO	NO	NO
dd_Smed_v6_10583_0_3	101	85	53	66	97	68	102.579	78.8886	65.0968	68.7763	90.6616	58.0127	77.3358	-0.185026	0.336525	-0.549814	0.582447	0.999994	-1.13684	NO	NO	NO	NO
dd_Smed_v6_10583_0_4	0	16	5	25	0	28	0	14.8496	6.14121	26.0516	0	23.8876	11.8217	1.24692	1.9054	0.654413	0.512846	0.999994	2.37334	NO	NO	2.37334	NO
dd_Smed_v6_10583_0_5	0	0	0	0	14	10	0	0	0	0	13.0852	8.53128	3.60274	7.5453	3.47344	2.17229	0.0298341	N/A	186.794	NO	NO	186.794	NO
dd_Smed_v6_10583_0_6	5	0	10	2	0	3	5.07816	0	12.2824	2.08413	0	2.55938	3.66735	-1.89041	1.99332	-0.948374	0.342939	N/A	-3.70741	-3.70741	NO	NO	NO
dd_Smed_v6_10584_0_1	14	12	34	21	20	25	14.2188	11.1372	41.7602	21.8834	18.6931	21.3282	21.5035	-0.102539	0.690208	-0.148563	0.881898	0.999994	-1.07366	NO	NO	NO	NO
dd_Smed_v6_10585_0_1	648	691	495	651	752	604	658.13	641.318	607.98	678.384	702.861	515.289	633.994	-0.00970421	0.155407	-0.0624437	0.95021	0.999994	-1.00675	NO	NO	NO	NO
dd_Smed_v6_10586_0_1	210	237	190	184	230	235	213.283	219.96	233.366	191.74	214.971	200.485	212.301	-0.132454	0.148678	-0.890879	0.372994	0.999994	-1.09616	NO	NO	NO	NO
dd_Smed_v6_10587_0_1	208	88	116	121	118	210	211.251	81.673	142.476	126.09	110.289	179.157	141.823	-0.0655631	0.42222	-0.155282	0.876599	0.999994	-1.04649	NO	NO	NO	NO
dd_Smed_v6_10587_0_2	96	248	117	152	190	162	97.5007	230.169	143.704	158.394	177.585	138.207	157.593	0.00639691	0.367369	0.0174128	0.986107	0.999994	1.00444	NO	NO	NO	NO
dd_Smed_v6_10589_0_1	57	66	53	64	66	64	57.891	61.2547	65.0968	66.6921	61.6873	54.6002	61.2037	-0.01093	0.269818	-0.0405088	0.967687	0.999994	-1.0076	NO	NO	NO	NO
dd_Smed_v6_1059_0_1	1493	1696	1301	1310	1282	1553	1516.34	1574.06	1597.94	1365.1	1198.23	1324.91	1429.43	-0.269992	0.0797784	-3.38427	0.000713672	0.0801002	-1.2058	NO	NO	NO	NO
dd_Smed_v6_10590_2_1	122	109	97	124	125	139	123.907	101.163	119.139	129.216	116.832	118.585	118.14	0.0845264	0.205533	0.411255	0.680886	0.999994	1.06034	NO	NO	NO	NO
dd_Smed_v6_10590_2_14	0	3	3	4	0	2	0	2.78431	3.68473	4.16826	0	1.70626	2.05726	-0.140676	2.08049	-0.0676169	0.946091	N/A	-1.10242	NO	NO	NO	NO
dd_Smed_v6_10590_2_2	0	11	0	0	0	0	0	10.2091	0	0	0	0	1.70152	-6.62565	4.58556	-1.44489	0.148488	N/A	-98.7461	-98.7461	NO	NO	NO
dd_Smed_v6_10590_2_3	0	0	0	0	0	0	0	0	0	0	0	0	0	#N/A	N/A	N/A	N/A	N/A	#N/A	#N/A	#N/A	#N/A	#N/A
dd_Smed_v6_10590_2_5	52	60	44	43	62	75	52.8129	55.6861	54.0426	44.8088	57.9487	63.9846	54.8806	0.0407739	0.303212	0.134473	0.893028	0.999994	1.02867	NO	NO	NO	NO
dd_Smed_v6_10591_0_1	402	320	271	253	297	312	408.284	296.993	332.854	263.642	277.593	266.176	307.59	-0.362207	0.174073	-2.08078	0.0374544	0.760645	-1.28539	NO	NO	NO	NO
dd_Smed_v6_10592_0_1	256	308	248	299	314	398	260.002	285.855	304.604	311.577	293.482	339.545	299.178	0.153897	0.143579	1.07187	0.283779	0.999994	1.11257	NO	NO	NO	NO
dd_Smed_v6_10593_0_1	199	194	174	156	179	166	202.111	180.052	213.714	162.562	167.303	141.619	177.894	-0.336772	0.178656	-1.88503	0.0594254	0.891022	-1.26293	NO	NO	NO	NO
dd_Smed_v6_10593_0_2	241	268	197	328	304	301	244.767	248.731	241.964	341.797	284.135	256.791	269.698	0.260695	0.16951	1.53793	0.124065	0.999994	1.19806	NO	NO	NO	NO
dd_Smed_v6_10594_0_1	12	15	8	14	13	17	12.1876	13.9215	9.82593	14.5889	12.1505	14.5032	12.8629	0.190003	0.568168	0.334414	0.738067	0.999994	1.14077	NO	NO	NO	NO
dd_Smed_v6_10595_0_1	538	575	465	463	559	548	546.41	533.658	571.132	482.476	522.473	467.514	520.611	-0.164363	0.103148	-1.59347	0.111054	0.999994	-1.12067	NO	NO	NO	NO
dd_Smed_v6_10596_0_1	35	57	44	60	47	65	35.5471	52.9018	54.0426	62.5239	43.9288	55.4533	50.7329	0.184795	0.355565	0.51972	0.603258	0.999994	1.13666	NO	NO	NO	NO
dd_Smed_v6_10598_0_1	17	42	25	19	31	27	17.2657	38.9803	30.706	19.7992	28.9743	23.0345	26.46	-0.276147	0.51481	-0.536406	0.591678	0.999994	-1.21096	NO	NO	NO	NO
dd_Smed_v6_10598_0_2	132	143	113	139	151	176	134.063	132.719	138.791	144.847	141.133	150.151	140.284	0.106447	0.172246	0.617995	0.536579	0.999994	1.07657	NO	NO	NO	NO
dd_Smed_v6_10598_0_3	8	14	13	22	16	24	8.12506	12.9934	15.9671	22.9254	14.9545	20.4751	15.9068	0.66071	0.576242	1.14658	0.251554	0.999994	1.58086	NO	NO	1.58086	NO
dd_Smed_v6_10599_0_1	75	86	44	69	84	84	76.1724	79.8167	54.0426	71.9025	78.5111	71.6627	72.018	0.073562	0.282884	0.260043	0.794831	0.999994	1.05231	NO	NO	NO	NO
dd_Smed_v6_106_0_1	5814	6323	4783	5327	5302	6318	5904.88	5868.39	5874.68	5551.08	4955.55	5390.06	5590.77	-0.15092	0.0568957	-2.65257	0.00798821	0.322205	-1.11028	NO	NO	NO	NO
dd_Smed_v6_1060_0_1	4940	5114	4238	4469	5952	5648	5017.22	4746.31	5205.29	4656.99	5563.07	4818.47	5001.22	0.00701928	0.0867444	0.0809191	0.935506	0.999994	1.00488	NO	NO	NO	NO
dd_Smed_v6_10600_0_1	0	1	0	0	1	0	0	0.928102	0	0	0.934656	0	0.31046	-0.0306605	4.27335	-0.00717482	0.994275	N/A	-1.02148	NO	NO	NO	NO
dd_Smed_v6_10601_0_1	252	309	206	250	251	266	255.939	286.783	253.018	260.516	234.599	226.932	252.965	-0.143815	0.148569	-0.968001	0.333044	0.999994	-1.10482	NO	NO	NO	NO
dd_Smed_v6_10602_0_1	338	320	248	328	459	364	343.284	296.993	304.604	341.797	429.007	310.539	337.704	0.194174	0.182193	1.06576	0.286531	0.999994	1.14407	NO	NO	NO	NO
dd_Smed_v6_10603_0_1	44	50	32	31	21	30	44.6878	46.4051	39.3037	32.304	19.6278	25.5938	34.6537	-0.757276	0.389499	-1.94423	0.0518675	0.857373	-1.6903	-1.6903	NO	NO	NO
dd_Smed_v6_10604_0_1	96	140	84	86	110	129	97.5007	129.934	103.172	89.6176	102.812	110.053	105.515	-0.129099	0.242654	-0.532031	0.594705	0.999994	-1.09361	NO	NO	NO	NO
dd_Smed_v6_10605_0_1	54	62	40	45	59	56	54.8441	57.5423	49.1297	46.8929	55.1447	47.7752	51.8881	-0.111592	0.291181	-0.38324	0.701542	0.999994	-1.08042	NO	NO	NO	NO
dd_Smed_v6_10607_0_1	77	73	55	81	71	73	78.2037	67.7514	67.5533	84.4072	66.3606	62.2783	71.0924	-0.00765899	0.275304	-0.0278201	0.977806	0.999994	-1.00532	NO	NO	NO	NO
dd_Smed_v6_10608_0_1	108	88	93	75	89	120	109.688	81.673	114.226	78.1549	83.1844	102.375	94.8837	-0.206171	0.271845	-0.758415	0.448202	0.999994	-1.15362	NO	NO	NO	NO
dd_Smed_v6_10609_0_1	88	112	72	104	94	110	89.3756	103.947	88.4334	108.375	87.8577	93.8441	95.3055	0.0371834	0.231721	0.160466	0.872514	0.999994	1.02611	NO	NO	NO	NO
dd_Smed_v6_10609_0_2	55	40	42	33	45	44	55.8598	37.1241	51.5862	34.3881	42.0595	37.5376	43.0925	-0.337693	0.353821	-0.954417	0.339872	0.999994	-1.26373	NO	NO	NO	NO
dd_Smed_v6_1061_0_1	988	2013	1257	1968	1713	1231	1003.44	1868.27	1543.9	2050.78	1601.07	1050.2	1519.61	0.0903236	0.29917	0.301914	0.762718	0.999994	1.06461	NO	NO	NO	NO
dd_Smed_v6_1061_0_2	1208	508	295	643	189	538	1226.88	471.476	362.331	670.048	176.65	458.983	561.062	-0.658788	0.574223	-1.14727	0.251271	0.999994	-1.57876	-1.57876	NO	NO	NO
dd_Smed_v6_1061_0_3	567	0	0	39	0	108	575.863	0	0	40.6405	0	92.1378	118.107	-2.11654	3.72745	-0.567825	0.570154	0.999994	-4.33654	-4.33654	NO	NO	NO
dd_Smed_v6_1061_0_4	25	758	476	596	569	415	25.3908	703.501	584.643	621.071	531.819	354.048	470.079	0.19814	1.11135	0.178287	0.858497	0.999994	1.14722	NO	NO	NO	NO
dd_Smed_v6_1061_0_5	795	881	514	753	535	553	807.427	817.658	631.316	784.675	500.041	471.78	668.816	-0.362991	0.240676	-1.50821	0.1315	0.999994	-1.28609	NO	NO	NO	NO
dd_Smed_v6_1061_0_6	0	0	0	0	0	0	0	0	0	0	0	0	0	#N/A	N/A	N/A	N/A	N/A	#N/A	#N/A	#N/A	#N/A	#N/A
dd_Smed_v6_10610_0_1	223	286	122	150	287	438	226.486	265.437	149.846	156.31	268.246	373.67	239.999	0.314302	0.388814	0.80836	0.418883	0.999994	1.24341	NO	NO	NO	NO
dd_Smed_v6_10610_0_2	338	365	292	387	352	330	343.284	338.757	358.647	403.279	328.999	281.532	342.416	-0.0393231	0.179436	-0.219148	0.826535	0.999994	-1.02763	NO	NO	NO	NO
dd_Smed_v6_10611_0_1	21	28	9	13	35	42	21.3283	25.9868	11.0542	13.5468	32.713	35.8314	23.4101	0.487218	0.638592	0.762956	0.44549	0.999994	1.40174	NO	NO	1.40174	NO
dd_Smed_v6_10611_0_2	222	243	215	262	275	335	225.47	225.529	264.072	273.021	257.03	285.798	255.153	0.193959	0.149414	1.29813	0.194242	0.999994	1.1439	NO	NO	NO	NO
dd_Smed_v6_10612_0_1	25	48	45	5	30	25	25.3908	44.5489	55.2709	5.21032	28.0397	21.3282	29.9648	-1.18984	0.719344	-1.65406	0.0981149	0.999994	-2.28127	-2.28127	NO	NO	NO
dd_Smed_v6_10612_0_2	159	174	146	143	189	166	161.485	161.49	179.323	149.015	176.65	141.619	161.597	-0.102603	0.187844	-0.546214	0.584919	0.999994	-1.07371	NO	NO	NO	NO
dd_Smed_v6_10613_0_1	203	230	190	181	255	267	206.173	213.463	233.366	188.614	238.337	227.785	217.956	0.00737749	0.172704	0.0427176	0.965927	0.999994	1.00513	NO	NO	NO	NO
dd_Smed_v6_10614_0_1	180	179	153	167	233	192	182.814	166.13	187.921	174.025	217.775	163.801	182.078	0.0507753	0.197578	0.256989	0.797187	0.999994	1.03582	NO	NO	NO	NO
dd_Smed_v6_10614_0_2	5	20	6	12	12	15	5.07816	18.562	7.36945	12.5048	11.2159	12.7969	11.2545	0.222285	0.77046	0.28851	0.772957	0.999994	1.16658	NO	NO	NO	NO
dd_Smed_v6_10615_0_1	218	198	170	169	231	196	221.408	183.764	208.801	176.109	215.906	167.213	195.533	-0.133838	0.193905	-0.690224	0.490053	0.999994	-1.09721	NO	NO	NO	NO
dd_Smed_v6_10616_0_1	24	24	26	22	17	33	24.3752	22.2744	31.9343	22.9254	15.8892	28.1532	24.2586	-0.221643	0.477491	-0.464183	0.642517	0.999994	-1.16606	NO	NO	NO	NO
dd_Smed_v6_10617_0_1	203	230	181	203	187	240	206.173	213.463	222.312	211.539	174.781	204.751	205.503	-0.11873	0.162576	-0.730307	0.465202	0.999994	-1.08578	NO	NO	NO	NO
dd_Smed_v6_10618_0_1	121	108	63	135	108	56	122.891	100.235	77.3792	140.679	100.943	47.7752	98.3171	-0.0586719	0.467738	-0.125438	0.900177	0.999994	-1.04151	NO	NO	NO	NO
dd_Smed_v6_10619_0_1	37	33	9	42	10	18	37.5784	30.6274	11.0542	43.7667	9.34656	15.3563	24.6216	-0.221619	0.822342	-0.269497	0.787547	0.999994	-1.16604	NO	NO	NO	NO
dd_Smed_v6_10619_0_2	154	124	112	125	146	158	156.407	115.085	137.563	130.258	136.46	134.794	135.095	-0.0247051	0.210176	-0.117545	0.906428	0.999994	-1.01727	NO	NO	NO	NO
dd_Smed_v6_10619_0_3	0	34	17	0	27	0	0	31.5555	20.8801	0	25.2357	0	12.9452	-1.05492	2.55772	-0.412448	0.680011	0.999994	-2.07761	-2.07761	NO	NO	NO
dd_Smed_v6_1062_0_1	0	47	116	85	797	971	0	43.6208	142.476	88.5755	744.921	828.387	307.997	3.15967	1.86194	1.69698	0.0897002	0.999994	8.93627	NO	NO	8.93627	NO
dd_Smed_v6_1062_0_2	0	132	402	101	57	18	0	122.509	493.753	105.249	53.2754	15.3563	131.69	-1.82558	2.00716	-0.909533	0.363069	0.999994	-3.54449	-3.54449	NO	NO	NO
dd_Smed_v6_1062_0_3	3356	3535	2456	3083	3617	3968	3408.46	3280.84	3016.56	3212.69	3380.65	3385.21	3280.74	0.0394948	0.066779	0.591426	0.554235	0.999994	1.02775	NO	NO	NO	NO
dd_Smed_v6_1062_0_4	1439	1427	1071	1451	1026	983	1461.49	1324.4	1315.45	1512.04	958.957	838.625	1235.16	-0.310167	0.228553	-1.35709	0.174753	0.999994	-1.23985	NO	NO	NO	NO
dd_Smed_v6_1062_0_5	3006	2773	2494	2557	2978	3109	3052.99	2573.63	3063.24	2664.56	2783.41	2652.37	2798.37	-0.100714	0.0892281	-1.12873	0.259011	0.999994	-1.0723	NO	NO	NO	NO
dd_Smed_v6_1062_0_6	0	0	0	0	10	28	0	0	0	0	9.34656	23.8876	5.53902	8.16625	3.40417	2.39889	0.0164447	0.490145	287.267	NO	NO	287.267	NO
dd_Smed_v6_1062_0_7	107	81	79	100	104	82	108.673	75.1762	97.0311	104.206	97.2042	69.9565	92.0412	-0.0505935	0.300705	-0.16825	0.866387	0.999994	-1.03569	NO	NO	NO	NO
dd_Smed_v6_10620_0_1	258	262	203	229	192	249	262.033	243.163	249.333	238.633	179.454	212.429	230.841	-0.260332	0.174033	-1.49587	0.134686	0.999994	-1.19775	NO	NO	NO	NO
dd_Smed_v6_10621_0_1	66	69	63	50	60	72	67.0317	64.039	77.3792	52.1032	56.0794	61.4252	63.0096	-0.290946	0.269857	-1.07815	0.280968	0.999994	-1.22344	NO	NO	NO	NO
dd_Smed_v6_10622_0_1	200	199	139	185	190	172	203.126	184.692	170.726	192.782	177.585	146.738	179.275	-0.11525	0.196348	-0.58697	0.557224	0.999994	-1.08316	NO	NO	NO	NO
dd_Smed_v6_10623_0_1	38	56	43	57	48	67	38.594	51.9737	52.8144	59.3977	44.8635	57.1596	50.8005	0.171993	0.328829	0.523045	0.600943	0.999994	1.12661	NO	NO	NO	NO
dd_Smed_v6_10624_0_1	579	636	478	658	709	617	588.051	590.273	587.1	685.679	662.671	526.38	606.692	0.0853175	0.1389	0.614239	0.539057	0.999994	1.06092	NO	NO	NO	NO
dd_Smed_v6_10625_0_1	257	242	185	235	267	241	261.017	224.601	227.225	244.885	249.553	205.604	235.481	-0.028081	0.168497	-0.166656	0.867641	0.999994	-1.01965	NO	NO	NO	NO
dd_Smed_v6_10625_0_2	300	261	179	237	284	303	304.69	242.235	219.855	246.969	265.442	258.498	256.281	0.00622908	0.18298	0.0340424	0.972843	0.999994	1.00433	NO	NO	NO	NO
dd_Smed_v6_10625_0_3	0	0	0	0	0	0	0	0	0	0	0	0	0	#N/A	N/A	N/A	N/A	N/A	#N/A	#N/A	#N/A	#N/A	#N/A
dd_Smed_v6_10625_0_4	3	1	0	0	0	0	3.0469	0.928102	0	0	0	0	0.6625	-5.2664	4.45642	-1.18176	0.237303	N/A	-38.4897	-38.4897	NO	NO	NO
dd_Smed_v6_10626_0_1	1	1	1	11	5	2	1.01563	0.928102	1.22824	11.4627	4.67328	1.70626	3.50237	2.49032	1.43744	1.73246	0.0831912	N/A	5.61902	NO	NO	5.61902	NO
dd_Smed_v6_10627_0_1	372	359	311	415	428	283	377.815	333.189	381.983	432.457	400.033	241.435	361.152	-0.0262821	0.25634	-0.102528	0.918337	0.999994	-1.01838	NO	NO	NO	NO
dd_Smed_v6_10628_0_1	99	112	118	91	125	132	100.548	103.947	144.933	94.8279	116.832	112.613	112.283	-0.101136	0.259694	-0.389444	0.696948	0.999994	-1.07262	NO	NO	NO	NO
dd_Smed_v6_10628_0_2	195	229	115	231	240	192	198.048	212.535	141.248	240.717	224.317	163.801	196.778	0.183702	0.264477	0.694586	0.487315	0.999994	1.13579	NO	NO	NO	NO
dd_Smed_v6_10629_0_1	208	222	167	176	262	286	211.251	206.039	205.116	183.403	244.88	243.995	215.781	0.113341	0.186966	0.606213	0.544374	0.999994	1.08173	NO	NO	NO	NO
dd_Smed_v6_1063_0_1	4015	4185	3222	3652	4671	5358	4077.76	3884.11	3957.4	3805.62	4365.78	4571.06	4110.29	0.0967705	0.0833298	1.1613	0.245522	0.999994	1.06938	NO	NO	NO	NO
dd_Smed_v6_10630_0_2	68	75	53	53	68	90	69.063	69.6076	65.0968	55.2294	63.5566	76.7815	66.5558	-0.0564874	0.277305	-0.203701	0.838587	0.999994	-1.03993	NO	NO	NO	NO
dd_Smed_v6_10631_0_1	47	111	0	81	62	59	47.7347	103.019	0	84.4072	57.9487	50.3345	57.2407	0.351192	1.25308	0.280262	0.779276	0.999994	1.27561	NO	NO	NO	NO
dd_Smed_v6_10631_0_2	61	22	77	47	92	71	61.9536	20.4182	94.5746	48.977	85.9884	60.5721	62.0806	0.150233	0.614888	0.244326	0.806978	0.999994	1.10975	NO	NO	NO	NO
dd_Smed_v6_10631_0_3	0	0	48	0	27	0	0	0	58.9556	0	25.2357	0	14.0319	-1.22244	3.40866	-0.358629	0.719873	0.999994	-2.33342	-2.33342	NO	NO	NO
dd_Smed_v6_10631_0_4	159	169	88	172	139	182	161.485	156.849	108.085	179.235	129.917	155.269	148.474	0.118162	0.263018	0.449257	0.653246	0.999994	1.08535	NO	NO	NO	NO
dd_Smed_v6_10632_0_1	565	650	457	578	613	573	573.832	603.266	561.307	602.313	572.944	488.842	567.084	-0.06527	0.124081	-0.526027	0.598869	0.999994	-1.04628	NO	NO	NO	NO
dd_Smed_v6_10633_0_1	86	181	143	188	159	116	87.3444	167.986	175.639	195.908	148.61	98.9628	145.742	0.0404736	0.403553	0.100293	0.920112	0.999994	1.02845	NO	NO	NO	NO
dd_Smed_v6_10633_0_2	631	713	298	517	614	573	640.864	661.737	366.016	538.747	573.879	488.842	545.014	-0.0610918	0.251809	-0.242612	0.808306	0.999994	-1.04325	NO	NO	NO	NO
dd_Smed_v6_10633_0_3	222	295	257	323	284	240	225.47	273.79	315.658	336.587	265.442	204.751	270.283	-0.0149982	0.256473	-0.0584789	0.953367	0.999994	-1.01045	NO	NO	NO	NO
dd_Smed_v6_10633_0_4	78	50	30	78	93	25	79.2193	46.4051	36.8473	81.281	86.923	21.3282	58.6673	0.21844	0.642218	0.340134	0.733756	0.999994	1.16347	NO	NO	NO	NO
dd_Smed_v6_10635_0_1	399	383	300	383	394	279	405.237	355.463	368.473	399.111	368.254	238.023	355.76	-0.169095	0.234815	-0.720121	0.47145	0.999994	-1.12435	NO	NO	NO	NO
dd_Smed_v6_10636_0_1	86	83	50	60	71	89	87.3444	77.0324	61.4121	62.5239	66.3606	75.9284	71.767	-0.142888	0.281006	-0.508486	0.611112	0.999994	-1.10411	NO	NO	NO	NO
dd_Smed_v6_10637_0_1	362	391	309	406	411	473	367.659	362.888	379.527	423.078	384.144	403.529	386.804	0.125548	0.11083	1.1328	0.2573	0.999994	1.09092	NO	NO	NO	NO
dd_Smed_v6_10638_0_1	570	626	436	620	656	544	578.91	580.992	535.513	646.08	613.134	464.102	569.789	0.0216783	0.163298	0.132753	0.894389	0.999994	1.01514	NO	NO	NO	NO
dd_Smed_v6_10639_0_10	3	10	3	7	8	6	3.0469	9.28102	3.68473	7.29445	7.47725	5.11877	5.98385	0.29088	0.918437	0.316713	0.751462	0.999994	1.22339	NO	NO	NO	NO
dd_Smed_v6_10639_0_12	7	15	10	11	4	8	7.10942	13.9215	12.2824	11.4627	3.73862	6.82502	9.22329	-0.605999	0.795421	-0.761859	0.446144	0.999994	-1.52203	-1.52203	NO	NO	NO
dd_Smed_v6_10639_0_6	45	54	30	49	46	49	45.7034	50.1175	36.8473	51.0612	42.9942	41.8033	44.7545	0.0252439	0.329308	0.0766574	0.938896	0.999994	1.01765	NO	NO	NO	NO
dd_Smed_v6_10639_0_8	13	8	4	7	9	10	13.2032	7.42481	4.91297	7.29445	8.4119	8.53128	8.29644	-0.0832985	0.766194	-0.108717	0.913427	0.999994	-1.05944	NO	NO	NO	NO
dd_Smed_v6_10639_0_9	12	12	4	2	4	8	12.1876	11.1372	4.91297	2.08413	3.73862	6.82502	6.81426	-1.15171	0.929719	-1.23878	0.215429	0.999994	-2.22178	-2.22178	NO	NO	NO
dd_Smed_v6_10640_0_1	815	923	697	800	1028	1130	827.74	856.638	856.085	833.652	960.826	964.035	883.163	0.120008	0.0962329	1.24706	0.212377	0.999994	1.08674	NO	NO	NO	NO
dd_Smed_v6_10642_0_1	60	66	58	62	52	107	60.9379	61.2547	71.238	64.608	48.6021	91.2847	66.3209	0.0850268	0.354909	0.239574	0.810661	0.999994	1.06071	NO	NO	NO	NO
dd_Smed_v6_10644_0_1	73	79	54	72	71	66	74.1411	73.32	66.3251	75.0287	66.3606	56.3064	68.5803	-0.118845	0.268442	-0.44272	0.657969	0.999994	-1.08586	NO	NO	NO	NO
dd_Smed_v6_10645_0_1	248	274	190	238	209	286	251.877	254.3	233.366	248.011	195.343	243.995	237.815	-0.107231	0.169327	-0.633279	0.526551	0.999994	-1.07716	NO	NO	NO	NO
dd_Smed_v6_10646_0_1	40	39	21	80	47	13	40.6253	36.196	25.7931	83.3652	43.9288	11.0907	40.1665	0.425713	0.75593	0.563164	0.573323	0.999994	1.34324	NO	NO	NO	NO
dd_Smed_v6_10647_0_1	227	225	192	219	260	263	230.548	208.823	235.822	228.212	243.011	224.373	228.465	0.0450565	0.145474	0.309722	0.756772	0.999994	1.03172	NO	NO	NO	NO
dd_Smed_v6_1065_0_1	3985	4100	3231	3739	5130	5322	4047.29	3805.22	3968.45	3896.28	4794.79	4540.35	4175.4	0.162982	0.0914686	1.78183	0.0747769	0.969471	1.1196	NO	NO	NO	NO
dd_Smed_v6_10650_0_1	62	61	47	56	54	66	62.9692	56.6142	57.7274	58.3556	50.4714	56.3064	57.074	-0.103484	0.273594	-0.378237	0.705254	0.999994	-1.07436	NO	NO	NO	NO
dd_Smed_v6_10651_0_1	138	155	127	146	161	157	140.157	143.856	155.987	152.141	150.48	133.941	146.094	-0.0109133	0.17935	-0.0608492	0.951479	0.999994	-1.00759	NO	NO	NO	NO
dd_Smed_v6_10653_0_1	339	464	318	323	400	468	344.299	430.639	390.581	336.587	373.862	399.264	379.205	-0.070158	0.151561	-0.462902	0.643435	0.999994	-1.04983	NO	NO	NO	NO
dd_Smed_v6_10654_1_1	101	134	94	149	134	125	102.579	124.366	115.455	155.268	125.244	106.641	121.592	0.173558	0.246619	0.703751	0.481588	0.999994	1.12784	NO	NO	NO	NO
dd_Smed_v6_10655_0_1	344	342	302	301	414	386	349.377	317.411	370.929	313.661	386.948	329.307	344.606	-0.00853277	0.151855	-0.0561901	0.95519	0.999994	-1.00593	NO	NO	NO	NO
dd_Smed_v6_10656_0_1	168	223	133	157	178	166	170.626	206.967	163.356	163.604	166.369	141.619	168.757	-0.202494	0.19615	-1.03234	0.301913	0.999994	-1.15069	NO	NO	NO	NO
dd_Smed_v6_10656_0_2	77	64	47	57	64	112	78.2037	59.3985	57.7274	59.3977	59.818	95.5503	68.3493	0.139075	0.351699	0.395437	0.69252	0.999994	1.1012	NO	NO	NO	NO
dd_Smed_v6_10657_0_1	154	187	162	162	195	227	156.407	173.555	198.975	168.814	182.258	193.66	178.945	0.0469938	0.183253	0.256442	0.79761	0.999994	1.03311	NO	NO	NO	NO
dd_Smed_v6_10658_0_1	73	72	57	67	100	106	74.1411	66.8233	70.0098	69.8183	93.4656	90.4316	77.4483	0.269526	0.261156	1.03205	0.302048	0.999994	1.20541	NO	NO	NO	NO
dd_Smed_v6_10658_0_2	3	5	3	3	6	8	3.0469	4.64051	3.68473	3.12619	5.60794	6.82502	4.48855	0.457615	0.966205	0.473621	0.635771	N/A	1.37327	NO	NO	NO	NO
dd_Smed_v6_10659_0_1	15	13	13	11	8	17	15.2345	12.0653	15.9671	11.4627	7.47725	14.5032	12.785	-0.363337	0.610281	-0.595359	0.551603	0.999994	-1.2864	NO	NO	NO	NO
dd_Smed_v6_1066_0_1	639	747	561	664	681	690	648.989	693.292	689.044	691.931	636.501	588.658	658.069	-0.0848071	0.105767	-0.801829	0.422652	0.999994	-1.06055	NO	NO	NO	NO
dd_Smed_v6_10660_0_1	535	662	479	575	704	796	543.363	614.403	588.328	599.187	657.998	679.09	613.728	0.149953	0.10839	1.38346	0.166524	0.999994	1.10953	NO	NO	NO	NO
dd_Smed_v6_10661_0_1	163	43	66	113	107	43	165.548	39.9084	81.064	117.753	100.008	36.6845	90.1611	-0.172548	0.66314	-0.260199	0.794711	0.999994	-1.12705	NO	NO	NO	NO
dd_Smed_v6_10661_0_2	46	188	122	112	136	204	46.7191	174.483	149.846	116.711	127.113	174.038	131.485	0.172282	0.515099	0.334463	0.73803	0.999994	1.12684	NO	NO	NO	NO
dd_Smed_v6_10662_0_1	227	264	223	254	288	333	230.548	245.019	273.898	264.684	269.181	284.092	261.237	0.129699	0.143431	0.904261	0.365857	0.999994	1.09407	NO	NO	NO	NO
dd_Smed_v6_10663_0_1	25	20	27	21	30	20	25.3908	18.562	33.1625	21.8834	28.0397	17.0626	24.0168	-0.196212	0.495992	-0.395595	0.692404	0.999994	-1.14569	NO	NO	NO	NO
dd_Smed_v6_10664_0_1	6	13	5	7	6	4	6.09379	12.0653	6.14121	7.29445	5.60794	3.41251	6.7692	-0.596766	0.852957	-0.699645	0.484149	0.999994	-1.51232	-1.51232	NO	NO	NO
dd_Smed_v6_10665_0_1	163	164	123	126	157	187	165.548	152.209	151.074	131.3	146.741	159.535	151.068	-0.0976005	0.183581	-0.531649	0.594969	0.999994	-1.06999	NO	NO	NO	NO
dd_Smed_v6_10666_0_1	87	24	47	91	0	55	88.36	22.2744	57.7274	94.8279	0	46.922	51.6853	-0.248663	1.35725	-0.183211	0.854632	0.999994	-1.18811	NO	NO	NO	NO
dd_Smed_v6_10666_0_2	256	330	248	195	345	389	260.002	306.274	304.604	203.203	322.456	331.867	288.068	-0.0203405	0.243386	-0.0835734	0.933396	0.999994	-1.0142	NO	NO	NO	NO
dd_Smed_v6_10667_0_1	399	406	337	351	410	500	405.237	376.809	413.917	365.765	383.209	426.564	395.25	-0.0219183	0.125311	-0.174912	0.861149	0.999994	-1.01531	NO	NO	NO	NO
dd_Smed_v6_10669_0_1	345	318	292	279	506	521	350.393	295.136	358.647	290.736	472.936	444.48	368.721	0.268882	0.233748	1.15031	0.250018	0.999994	1.20487	NO	NO	NO	NO
dd_Smed_v6_1067_0_1	776	869	619	716	760	882	788.13	806.52	760.282	746.118	710.339	752.459	760.641	-0.0934326	0.0812121	-1.15048	0.249948	0.999994	-1.06691	NO	NO	NO	NO
dd_Smed_v6_10670_0_1	314	254	215	287	342	348	318.908	235.738	264.072	299.073	319.652	296.889	289.055	0.161816	0.171058	0.945973	0.344162	0.999994	1.11869	NO	NO	NO	NO
dd_Smed_v6_10670_0_2	97	148	85	96	107	130	98.5163	137.359	104.401	100.038	100.008	110.907	108.538	-0.132494	0.243023	-0.545192	0.585622	0.999994	-1.09619	NO	NO	NO	NO
dd_Smed_v6_10670_0_3	0	0	0	0	0	0	0	0	0	0	0	0	0	#N/A	N/A	N/A	N/A	N/A	#N/A	#N/A	#N/A	#N/A	#N/A
dd_Smed_v6_10670_0_4	174	203	145	220	232	267	176.72	188.405	178.095	229.254	216.84	227.785	202.85	0.309653	0.14617	2.11845	0.0341374	0.729423	1.23941	NO	NO	NO	NO
dd_Smed_v6_10671_0_1	241	306	210	242	293	281	244.767	283.999	257.931	252.18	273.854	239.729	258.743	-0.0406221	0.148221	-0.274064	0.784036	0.999994	-1.02856	NO	NO	NO	NO
dd_Smed_v6_10672_0_1	258	217	202	215	250	285	262.033	201.398	248.105	224.044	233.664	243.141	235.398	-0.0188958	0.172094	-0.109799	0.912569	0.999994	-1.01318	NO	NO	NO	NO
dd_Smed_v6_10673_0_1	145	116	120	103	108	139	147.267	107.66	147.389	107.333	100.943	118.585	121.529	-0.29527	0.237606	-1.24269	0.213982	0.999994	-1.22711	NO	NO	NO	NO
dd_Smed_v6_10674_0_1	195	214	169	229	226	249	198.048	198.614	207.573	238.633	211.232	212.429	211.088	0.131825	0.149774	0.880161	0.378772	0.999994	1.09568	NO	NO	NO	NO
dd_Smed_v6_10675_0_1	166	171	133	151	190	228	168.595	158.705	163.356	157.352	177.585	194.513	170.018	0.112568	0.176444	0.637985	0.523484	0.999994	1.08115	NO	NO	NO	NO
dd_Smed_v6_10675_0_2	6	9	12	12	8	17	6.09379	8.35292	14.7389	12.5048	7.47725	14.5032	10.6118	0.257211	0.727876	0.353372	0.72381	0.999994	1.19517	NO	NO	NO	NO
dd_Smed_v6_10676_0_1	243	301	256	248	347	416	246.799	279.359	314.43	258.432	324.326	354.901	296.374	0.160953	0.194727	0.826557	0.408488	0.999994	1.11803	NO	NO	NO	NO
dd_Smed_v6_10677_0_1	393	443	286	461	473	402	399.143	411.149	351.277	480.392	442.092	342.957	404.502	0.120747	0.179522	0.672604	0.501199	0.999994	1.0873	NO	NO	NO	NO
dd_Smed_v6_10678_0_1	29	39	31	46	49	63	29.4533	36.196	38.0755	47.935	45.7981	53.7471	41.8675	0.511815	0.331303	1.54486	0.122381	0.999994	1.42584	NO	NO	1.42584	NO
dd_Smed_v6_10679_0_1	4	1	0	3	0	1	4.06253	0.928102	0	3.12619	0	0.853128	1.49499	-0.355919	2.30218	-0.154601	0.877136	N/A	-1.2798	NO	NO	NO	NO
dd_Smed_v6_1068_0_1	2513	2427	2230	1971	2302	2647	2552.28	2252.5	2738.98	2053.91	2151.58	2258.23	2334.58	-0.2218	0.0954733	-2.32316	0.0201706	0.547572	-1.16619	NO	NO	NO	NO
dd_Smed_v6_10680_0_1	3	1	1	1	1	1	3.0469	0.928102	1.22824	1.04206	0.934656	0.853128	1.33885	-0.885641	1.66455	-0.532061	0.594684	N/A	-1.84759	-1.84759	NO	NO	NO
dd_Smed_v6_10681_0_1	95	84	60	66	23	141	96.485	77.9605	73.6945	68.7763	21.4971	120.291	76.4507	-0.235784	0.622741	-0.378623	0.704968	0.999994	-1.17755	NO	NO	NO	NO
dd_Smed_v6_10681_0_2	22	0	0	33	100	22	22.3439	0	0	34.3881	93.4656	18.7688	28.1611	2.71041	1.70487	1.5898	0.11188	0.999994	6.54507	NO	NO	6.54507	NO
dd_Smed_v6_10681_0_3	0	75	2	21	63	70	0	69.6076	2.45648	21.8834	58.8833	59.719	35.425	0.95946	1.54875	0.619507	0.535582	0.999994	1.94458	NO	NO	1.94458	NO
dd_Smed_v6_10681_0_4	354	330	284	320	319	367	359.534	306.274	348.821	333.461	298.155	313.098	326.557	-0.102179	0.136814	-0.746849	0.455155	0.999994	-1.07339	NO	NO	NO	NO
dd_Smed_v6_10682_0_1	394	470	364	365	427	488	400.159	436.208	447.08	380.354	399.098	416.326	413.204	-0.100093	0.114404	-0.874907	0.381625	0.999994	-1.07184	NO	NO	NO	NO
dd_Smed_v6_10683_0_1	431	438	404	421	583	588	437.737	406.509	496.21	438.709	544.904	501.639	470.951	0.150895	0.148279	1.01764	0.308848	0.999994	1.11026	NO	NO	NO	NO
dd_Smed_v6_10684_0_1	212	258	205	249	292	315	215.314	239.45	251.79	259.474	272.92	268.735	251.28	0.183423	0.141282	1.29827	0.194194	0.999994	1.13558	NO	NO	NO	NO
dd_Smed_v6_10685_0_1	54	64	39	47	66	66	54.8441	59.3985	47.9014	48.977	61.6873	56.3064	54.8525	0.0397255	0.294131	0.135061	0.892564	0.999994	1.02792	NO	NO	NO	NO
dd_Smed_v6_10687_0_1	248	265	203	261	286	325	251.877	245.947	249.333	271.979	267.312	277.267	260.619	0.12863	0.126227	1.01904	0.308184	0.999994	1.09326	NO	NO	NO	NO
dd_Smed_v6_10688_0_1	333	353	295	363	401	455	338.205	327.62	362.331	378.269	374.797	388.173	361.566	0.153161	0.113799	1.34589	0.178339	0.999994	1.112	NO	NO	NO	NO
dd_Smed_v6_10689_0_1	278	272	174	334	304	275	282.346	252.444	213.714	348.05	284.135	234.61	269.216	0.208257	0.222318	0.93675	0.348887	0.999994	1.15529	NO	NO	NO	NO
dd_Smed_v6_10689_0_2	52	88	66	57	102	75	52.8129	81.673	81.064	59.3977	95.3349	63.9846	72.3778	0.0227531	0.359903	0.06322	0.949591	0.999994	1.0159	NO	NO	NO	NO
dd_Smed_v6_1069_0_1	2521	2473	2031	2177	3109	3394	2560.41	2295.2	2494.56	2268.57	2905.85	2895.52	2570.02	0.135361	0.119511	1.13263	0.25737	0.999994	1.09837	NO	NO	NO	NO
dd_Smed_v6_10690_0_1	19	31	19	24	24	39	19.297	28.7712	23.3366	25.0096	22.4317	33.272	25.353	0.177112	0.452103	0.391751	0.695242	0.999994	1.13062	NO	NO	NO	NO
dd_Smed_v6_10691_0_1	216	231	136	194	226	249	219.377	214.391	167.041	202.161	211.232	212.429	204.438	0.0552213	0.179993	0.306797	0.758998	0.999994	1.03902	NO	NO	NO	NO
dd_Smed_v6_10693_0_1	0	0	1	0	0	1	0	0	1.22824	0	0	0.853128	0.346895	-0.442949	4.23888	-0.104497	0.916775	N/A	-1.35938	NO	NO	NO	NO
dd_Smed_v6_10693_0_2	64	119	37	85	48	54	65.0005	110.444	45.4449	88.5755	44.8635	46.0689	66.7329	-0.306702	0.507501	-0.604339	0.545618	0.999994	-1.23688	NO	NO	NO	NO
dd_Smed_v6_10693_0_3	92	137	0	36	0	13	93.4382	127.15	0	37.5143	0	11.0907	44.8655	-2.18481	1.87792	-1.16342	0.244658	0.999994	-4.54667	-4.54667	NO	NO	NO
dd_Smed_v6_10693_0_4	128	3	192	115	243	232	130.001	2.78431	235.822	119.837	227.121	197.926	152.249	0.565407	1.0464	0.540336	0.588965	0.999994	1.4798	NO	NO	1.4798	NO
dd_Smed_v6_10693_0_5	0	11	14	17	19	14	0	10.2091	17.1954	17.7151	17.7585	11.9438	12.4703	0.798682	1.20231	0.664291	0.506504	0.999994	1.73951	NO	NO	1.73951	NO
dd_Smed_v6_10693_0_6	18	22	5	18	6	13	18.2814	20.4182	6.14121	18.7572	5.60794	11.0907	13.3828	-0.354949	0.814781	-0.435637	0.6631	0.999994	-1.27894	NO	NO	NO	NO
dd_Smed_v6_10696_0_1	34	0	59	0	31	0	34.5315	0	72.4663	0	28.9743	0	22.662	-1.8835	2.49682	-0.754359	0.450634	0.999994	-3.68968	-3.68968	NO	NO	NO
dd_Smed_v6_10696_0_2	32	0	0	0	30	28	32.5002	0	0	0	28.0397	23.8876	14.0712	0.675701	2.54674	0.26532	0.790763	0.999994	1.59737	NO	NO	1.59737	NO
dd_Smed_v6_10696_0_3	721	929	569	901	855	819	732.271	862.207	698.87	938.9	799.131	698.712	788.348	0.0855583	0.158455	0.539953	0.589229	0.999994	1.0611	NO	NO	NO	NO
dd_Smed_v6_10698_0_1	162	147	119	135	148	175	164.532	136.431	146.161	140.679	138.329	149.297	145.905	-0.0607956	0.184182	-0.330084	0.741337	0.999994	-1.04304	NO	NO	NO	NO
dd_Smed_v6_10699_0_1	281	272	223	284	298	309	285.393	252.444	273.898	295.946	278.527	263.617	274.971	0.0457992	0.138206	0.331384	0.740354	0.999994	1.03225	NO	NO	NO	NO
dd_Smed_v6_107_0_1	4325	4568	3513	4243	3865	4457	4392.61	4239.57	4314.81	4421.48	3612.45	3802.39	4130.55	-0.129707	0.0889202	-1.45869	0.144651	0.999994	-1.09407	NO	NO	NO	NO
dd_Smed_v6_1070_0_1	10342	10379	8082	10200	15193	18198	10503.7	9632.77	9926.65	10629.1	14200.2	15525.2	11736.3	0.424835	0.136792	3.1057	0.0018983	0.141356	1.34242	NO	NO	NO	NO
dd_Smed_v6_10700_0_1	408	530	345	429	495	482	414.378	491.894	423.743	447.046	462.655	411.208	441.821	-0.0122134	0.130588	-0.0935263	0.925485	0.999994	-1.0085	NO	NO	NO	NO
dd_Smed_v6_10701_0_1	0	0	0	0	0	0	0	0	0	0	0	0	0	#N/A	N/A	N/A	N/A	N/A	#N/A	#N/A	#N/A	#N/A	#N/A
dd_Smed_v6_10703_0_1	149	137	114	118	155	155	151.329	127.15	140.02	122.964	144.872	132.235	136.428	-0.0628694	0.194703	-0.322899	0.746772	0.999994	-1.04454	NO	NO	NO	NO
dd_Smed_v6_10704_0_1	56	52	0	0	35	45	56.8754	48.2613	0	0	32.713	38.3908	29.3734	-0.564329	1.86212	-0.303057	0.761847	0.999994	-1.4787	-1.4787	NO	NO	NO
dd_Smed_v6_10704_0_2	361	439	378	496	474	570	366.643	407.437	464.275	516.864	443.027	486.283	447.422	0.225404	0.144842	1.55621	0.119659	0.999994	1.1691	NO	NO	NO	NO
dd_Smed_v6_10707_0_1	225	265	209	188	277	246	228.517	245.947	256.703	195.908	258.9	209.869	232.641	-0.135953	0.180046	-0.755104	0.450186	0.999994	-1.09882	NO	NO	NO	NO
dd_Smed_v6_10708_0_1	307	335	248	291	301	318	311.799	310.914	304.604	303.241	281.331	271.295	297.197	-0.117766	0.125108	-0.94131	0.346546	0.999994	-1.08505	NO	NO	NO	NO
dd_Smed_v6_10708_0_2	11	22	16	13	13	28	11.172	20.4182	19.6519	13.5468	12.1505	23.8876	16.8045	-0.0399181	0.609542	-0.0654886	0.947785	0.999994	-1.02806	NO	NO	NO	NO
dd_Smed_v6_10709_0_1	94	96	94	96	109	106	95.4694	89.0978	115.455	100.038	101.878	90.4316	98.7282	-0.0333354	0.230606	-0.144555	0.885062	0.999994	-1.02338	NO	NO	NO	NO
dd_Smed_v6_1071_0_1	145	217	87	418	159	53	147.267	201.398	106.857	435.583	148.61	45.2158	180.822	0.464651	0.729821	0.636665	0.524343	0.999994	1.37998	NO	NO	NO	NO
dd_Smed_v6_1071_0_2	947	787	542	1322	617	356	961.804	730.416	665.707	1377.61	576.683	303.714	769.322	-0.0630744	0.488465	-0.129128	0.897257	0.999994	-1.04469	NO	NO	NO	NO
dd_Smed_v6_1071_0_3	490	484	237	999	443	208	497.66	449.201	291.093	1041.02	414.053	177.451	478.413	0.39823	0.572651	0.695414	0.486796	0.999994	1.31789	NO	NO	NO	NO
dd_Smed_v6_10710_0_1	150	147	126	144	135	155	152.345	136.431	154.758	150.057	126.179	132.235	142.001	-0.118519	0.188899	-0.627421	0.530383	0.999994	-1.08562	NO	NO	NO	NO
dd_Smed_v6_10711_0_1	70	87	62	86	86	102	71.0942	80.7449	76.151	89.6176	80.3804	87.019	80.8345	0.171526	0.231922	0.739587	0.459551	0.999994	1.12625	NO	NO	NO	NO
dd_Smed_v6_10712_0_1	166	151	101	113	151	164	168.595	140.143	124.052	117.753	141.133	139.913	138.598	-0.118806	0.221391	-0.536635	0.59152	0.999994	-1.08584	NO	NO	NO	NO
dd_Smed_v6_10713_0_1	8	8	5	3	4	3	8.12506	7.42481	6.14121	3.12619	3.73862	2.55938	5.18588	-1.21066	0.895207	-1.35239	0.176252	N/A	-2.31444	-2.31444	NO	NO	NO
dd_Smed_v6_10714_0_1	279	327	230	322	322	366	283.361	303.489	282.496	335.545	300.959	312.245	303.016	0.123794	0.127496	0.970968	0.331564	0.999994	1.0896	NO	NO	NO	NO
dd_Smed_v6_10715_0_1	61	39	43	42	51	42	61.9536	36.196	52.8144	43.7667	47.6675	35.8314	46.3716	-0.244798	0.376882	-0.649534	0.515993	0.999994	-1.18493	NO	NO	NO	NO
dd_Smed_v6_10716_0_1	178	157	170	166	235	251	180.783	145.712	208.801	172.983	219.644	214.135	190.343	0.185978	0.223694	0.831397	0.405749	0.999994	1.13759	NO	NO	NO	NO
dd_Smed_v6_10717_0_1	380	348	285	400	406	467	385.94	322.979	350.049	416.826	379.47	398.411	375.613	0.174155	0.130481	1.33471	0.18197	0.999994	1.1283	NO	NO	NO	NO
dd_Smed_v6_10718_0_1	83	134	113	48	75	101	84.2975	124.366	138.791	50.0191	70.0992	86.1659	92.2898	-0.746714	0.351671	-2.12333	0.0337262	0.727541	-1.67797	-1.67797	NO	NO	NO
dd_Smed_v6_10718_0_2	190	151	143	206	271	269	192.97	140.143	175.639	214.665	253.292	229.491	201.033	0.457851	0.199749	2.29213	0.0218982	0.574222	1.37349	NO	NO	NO	NO
dd_Smed_v6_10718_0_3	0	0	17	0	0	0	0	0	20.8801	0	0	0	3.48002	-7.64911	4.57366	-1.67243	0.0944401	N/A	-200.73	-200.73	NO	NO	NO
dd_Smed_v6_10718_0_4	75	57	42	75	66	27	76.1724	52.9018	51.5862	78.1549	61.6873	23.0345	57.2562	-0.154198	0.541443	-0.28479	0.775805	0.999994	-1.1128	NO	NO	NO	NO
dd_Smed_v6_10719_0_1	0	1	0	0	65	44	0	0.928102	0	0	60.7526	37.5376	16.5364	6.62773	2.32416	2.85166	0.0043491	0.233355	98.8887	NO	NO	98.8887	NO
dd_Smed_v6_10719_0_10	13	26	23	22	17	25	13.2032	24.1306	28.2496	22.9254	15.8892	21.3282	20.9544	-0.120653	0.536053	-0.225077	0.821919	0.999994	-1.08723	NO	NO	NO	NO
dd_Smed_v6_10719_0_11	17	23	12	0	23	17	17.2657	21.3463	14.7389	0	21.4971	14.5032	14.8919	-0.564253	1.20913	-0.466662	0.640742	0.999994	-1.47862	-1.47862	NO	NO	NO
dd_Smed_v6_10719_0_2	0	0	0	0	0	0	0	0	0	0	0	0	0	#N/A	N/A	N/A	N/A	N/A	#N/A	#N/A	#N/A	#N/A	#N/A
dd_Smed_v6_10719_0_3	0	0	0	0	43	53	0	0	0	0	40.1902	45.2158	14.2343	9.52635	3.24627	2.93455	0.00334032	0.200014	737.421	NO	NO	737.421	NO
dd_Smed_v6_10719_0_4	5	0	0	0	6	0	5.07816	0	0	0	5.60794	0	1.78102	0.140508	3.82846	0.0367009	0.970724	N/A	1.10229	NO	NO	NO	NO
dd_Smed_v6_10719_0_5	53	69	35	107	0	0	53.8285	64.039	42.9885	111.501	0	0	45.3928	-0.530305	1.9431	-0.272917	0.784917	0.999994	-1.44423	-1.44423	NO	NO	NO
dd_Smed_v6_10719_0_6	0	0	18	26	0	13	0	0	22.1084	27.0937	0	11.0907	10.0488	0.794192	2.60566	0.304795	0.760522	0.999994	1.73411	NO	NO	1.73411	NO
dd_Smed_v6_10719_0_7	185	206	150	166	234	190	187.892	191.189	184.236	172.983	218.71	162.094	186.184	-0.0254745	0.194111	-0.131237	0.895588	0.999994	-1.01781	NO	NO	NO	NO
dd_Smed_v6_10719_0_8	169	165	122	160	210	175	171.642	153.137	149.846	166.73	196.278	149.297	164.488	0.108585	0.199298	0.544838	0.585865	0.999994	1.07817	NO	NO	NO	NO
dd_Smed_v6_10719_0_9	5	8	27	46	6	16	5.07816	7.42481	33.1625	47.935	5.60794	13.65	18.8097	0.56384	1.10737	0.509171	0.610632	0.999994	1.4782	NO	NO	1.4782	NO
dd_Smed_v6_1072_0_1	809	791	631	759	514	690	821.646	734.128	775.021	790.927	480.413	588.658	698.466	-0.3263	0.203768	-1.60133	0.109304	0.999994	-1.25379	NO	NO	NO	NO
dd_Smed_v6_10722_0_1	181	155	171	192	199	191	183.829	143.856	210.029	200.076	185.997	162.947	181.122	0.0325834	0.223519	0.145775	0.884099	0.999994	1.02284	NO	NO	NO	NO
dd_Smed_v6_10722_0_2	56	43	43	56	52	46	56.8754	39.9084	52.8144	58.3556	48.6021	39.2439	49.3	-0.0340292	0.3513	-0.0968668	0.922832	0.999994	-1.02387	NO	NO	NO	NO
dd_Smed_v6_10722_0_3	24	26	22	26	23	24	24.3752	24.1306	27.0213	27.0937	21.4971	20.4751	24.0988	-0.130782	0.421591	-0.310212	0.7564	0.999994	-1.09489	NO	NO	NO	NO
dd_Smed_v6_10722_0_4	1	4	0	0	0	0	1.01563	3.71241	0	0	0	0	0.788006	-5.52127	4.31391	-1.27988	0.200588	N/A	-45.927	-45.927	NO	NO	NO
dd_Smed_v6_10722_0_5	0	0	0	0	0	0	0	0	0	0	0	0	0	#N/A	N/A	N/A	N/A	N/A	#N/A	#N/A	#N/A	#N/A	#N/A
dd_Smed_v6_10722_0_6	19	16	14	11	18	20	19.297	14.8496	17.1954	11.4627	16.8238	17.0626	16.1152	-0.171496	0.525676	-0.326239	0.744243	0.999994	-1.12623	NO	NO	NO	NO
dd_Smed_v6_10722_0_7	0	17	3	8	8	12	0	15.7777	3.68473	8.33652	7.47725	10.2375	7.58563	0.409835	1.36802	0.299582	0.764496	0.999994	1.32853	NO	NO	NO	NO
dd_Smed_v6_10724_0_1	477	532	445	508	594	729	484.456	493.75	546.568	529.369	555.186	621.93	538.543	0.165281	0.120697	1.36939	0.170877	0.999994	1.12138	NO	NO	NO	NO
dd_Smed_v6_10725_0_1	68	70	68	81	86	103	69.063	64.9671	83.5204	84.4072	80.3804	87.8722	78.3684	0.222185	0.247928	0.896167	0.370164	0.999994	1.1665	NO	NO	NO	NO
dd_Smed_v6_10727_0_1	0	0	26	0	0	0	0	0	31.9343	0	0	0	5.32238	-8.26313	4.47586	-1.84615	0.0648698	N/A	-307.221	-307.221	NO	NO	NO
dd_Smed_v6_10727_0_10	0	0	9	3	0	11	0	0	11.0542	3.12619	0	9.38441	3.92746	0.193695	2.74309	0.070612	0.943707	N/A	1.14369	NO	NO	NO	NO
dd_Smed_v6_10727_0_11	2	0	6	0	5	3	2.03126	0	7.36945	0	4.67328	2.55938	2.77223	-0.352112	2.06908	-0.170178	0.86487	N/A	-1.27643	NO	NO	NO	NO
dd_Smed_v6_10727_0_12	17	33	22	18	20	23	17.2657	30.6274	27.0213	18.7572	18.6931	19.6219	21.9978	-0.392289	0.479216	-0.818605	0.413012	0.999994	-1.31247	NO	NO	NO	NO
dd_Smed_v6_10727_0_13	0	2	9	0	0	0	0	1.8562	11.0542	0	0	0	2.15173	-6.95105	3.76737	-1.84507	0.0650276	N/A	-123.73	-123.73	NO	NO	NO
dd_Smed_v6_10727_0_14	4	17	0	0	24	27	4.06253	15.7777	0	0	22.4317	23.0345	10.8844	1.18917	1.90146	0.625396	0.531711	0.999994	2.28021	NO	NO	2.28021	NO
dd_Smed_v6_10727_0_15	0	3	0	2	4	0	0	2.78431	0	2.08413	3.73862	0	1.43451	1.02915	2.86613	0.359073	0.71954	N/A	2.04082	NO	NO	2.04082	NO
dd_Smed_v6_10727_0_16	0	5	0	0	0	0	0	4.64051	0	0	0	0	0.773418	-5.49405	4.61333	-1.19091	0.23369	N/A	-45.0687	-45.0687	NO	NO	NO
dd_Smed_v6_10727_0_17	3	0	0	12	0	0	3.0469	0	0	12.5048	0	0	2.59195	2.02822	3.77532	0.537231	0.591108	N/A	4.07901	NO	NO	4.07901	NO
dd_Smed_v6_10727_0_18	9	0	0	4	4	2	9.14069	0	0	4.16826	3.73862	1.70626	3.12564	0.0631063	2.06358	0.030581	0.975604	N/A	1.04471	NO	NO	NO	NO
dd_Smed_v6_10727_0_19	0	2	0	0	0	0	0	1.8562	0	0	0	0	0.309367	-4.18616	4.68779	-0.892993	0.371861	N/A	-18.2037	-18.2037	NO	NO	NO
dd_Smed_v6_10727_0_2	78	62	26	84	82	72	79.2193	57.5423	31.9343	87.5334	76.6418	61.4252	65.7161	0.411974	0.429736	0.958668	0.337726	0.999994	1.3305	NO	NO	NO	NO
dd_Smed_v6_10727_0_20	5	10	4	7	4	12	5.07816	9.28102	4.91297	7.29445	3.73862	10.2375	6.75713	0.135006	0.87336	0.154583	0.87715	0.999994	1.0981	NO	NO	NO	NO
dd_Smed_v6_10727_0_5	23	55	13	20	59	53	23.3595	51.0456	15.9671	20.8413	55.1447	45.2158	35.2623	0.417855	0.658404	0.634648	0.525658	0.999994	1.33594	NO	NO	NO	NO
dd_Smed_v6_10727_0_6	0	0	13	0	0	0	0	0	15.9671	0	0	0	2.66119	-7.26104	4.57722	-1.58634	0.112662	N/A	-153.388	-153.388	NO	NO	NO
dd_Smed_v6_10727_0_7	61	41	30	54	68	49	61.9536	38.0522	36.8473	56.2715	63.5566	41.8033	49.7474	0.23598	0.398389	0.592336	0.553625	0.999994	1.17771	NO	NO	NO	NO
dd_Smed_v6_10727_0_9	1	2	4	2	3	3	1.01563	1.8562	4.91297	2.08413	2.80397	2.55938	2.53871	-0.0280942	1.29214	-0.0217425	0.982653	N/A	-1.01966	NO	NO	NO	NO
dd_Smed_v6_10729_0_1	76	96	78	89	71	83	77.188	89.0978	95.8029	92.7438	66.3606	70.8096	82.0004	-0.19042	0.272607	-0.698516	0.484855	0.999994	-1.1411	NO	NO	NO	NO
dd_Smed_v6_1073_0_1	5160	6102	4478	5017	5721	7438	5240.66	5663.28	5500.07	5228.04	5347.17	6345.57	5554.13	0.044976	0.0913452	0.492374	0.622455	0.999994	1.03167	NO	NO	NO	NO
dd_Smed_v6_10730_0_1	132	136	80	100	172	72	134.063	126.222	98.2593	104.206	160.761	61.4252	114.156	-0.138028	0.415345	-0.332322	0.739646	0.999994	-1.1004	NO	NO	NO	NO
dd_Smed_v6_10730_0_2	234	284	263	347	315	316	237.658	263.581	323.028	361.596	294.417	269.588	291.645	0.168093	0.20501	0.819926	0.412258	0.999994	1.12357	NO	NO	NO	NO
dd_Smed_v6_10731_0_1	281	256	221	254	245	244	285.393	237.594	271.441	264.684	228.991	208.163	249.378	-0.179733	0.174898	-1.02764	0.304118	0.999994	-1.13267	NO	NO	NO	NO
dd_Smed_v6_10732_0_1	379	382	317	378	411	438	384.925	354.535	389.353	393.9	384.144	373.67	380.088	0.0299917	0.112559	0.266453	0.78989	0.999994	1.02101	NO	NO	NO	NO
dd_Smed_v6_10733_0_1	125	115	110	117	125	143	126.954	106.732	135.107	121.922	116.832	121.997	121.591	-0.0276576	0.204194	-0.135448	0.892258	0.999994	-1.01936	NO	NO	NO	NO
dd_Smed_v6_10733_0_2	26	60	28	17	11	26	26.4064	55.6861	34.3908	17.7151	10.2812	22.1813	27.7768	-1.21613	0.564378	-2.15482	0.0311759	0.697121	-2.32323	-2.32323	NO	NO	NO
dd_Smed_v6_10733_1_1	2	0	0	5	2	1	2.03126	0	0	5.21032	1.86931	0.853128	1.66067	1.93579	2.16633	0.893581	0.371546	N/A	3.82588	NO	NO	3.82588	NO
dd_Smed_v6_10733_1_2	4	4	0	3	2	1	4.06253	3.71241	0	3.12619	1.86931	0.853128	2.27059	-0.449545	1.61056	-0.279124	0.78015	N/A	-1.36561	NO	NO	NO	NO
dd_Smed_v6_10733_1_3	0	0	0	0	0	0	0	0	0	0	0	0	0	#N/A	N/A	N/A	N/A	N/A	#N/A	#N/A	#N/A	#N/A	#N/A
dd_Smed_v6_10734_0_1	566	532	412	522	559	422	574.848	493.75	506.036	543.958	522.473	360.02	500.181	-0.143901	0.200016	-0.719447	0.471866	0.999994	-1.10489	NO	NO	NO	NO
dd_Smed_v6_10735_0_1	10	13	10	20	15	13	10.1563	12.0653	12.2824	20.8413	14.0198	11.0907	13.4093	0.406894	0.599788	0.678396	0.497521	0.999994	1.32583	NO	NO	NO	NO
dd_Smed_v6_10735_0_10	6	9	11	9	11	9	6.09379	8.35292	13.5107	9.37858	10.2812	7.67815	9.21589	-0.0203741	0.712068	-0.0286126	0.977174	0.999994	-1.01422	NO	NO	NO	NO
dd_Smed_v6_10737_0_1	521	586	464	564	702	709	529.144	543.868	569.904	587.724	656.129	604.868	581.939	0.171708	0.0999428	1.71806	0.0857853	0.999994	1.12639	NO	NO	NO	NO
dd_Smed_v6_10738_0_1	0	14	20	0	18	0	0	12.9934	24.5648	0	16.8238	0	9.06368	-1.15652	2.57231	-0.449605	0.652995	0.999994	-2.22919	-2.22919	NO	NO	NO
dd_Smed_v6_10738_0_2	93	99	23	103	62	62	94.4538	91.8821	28.2496	107.333	57.9487	52.8939	72.1268	0.0177054	0.579142	0.0305719	0.975611	0.999994	1.01235	NO	NO	NO	NO
dd_Smed_v6_10739_0_1	18	31	22	28	30	37	18.2814	28.7712	27.0213	29.1778	28.0397	31.5657	27.1428	0.26285	0.421535	0.623553	0.532921	0.999994	1.19985	NO	NO	NO	NO
dd_Smed_v6_1074_0_1	2792	3573	2120	2715	2373	3252	2835.64	3316.11	2603.87	2829.21	2217.94	2774.37	2762.86	-0.163239	0.136961	-1.19186	0.233316	0.999994	-1.1198	NO	NO	NO	NO
dd_Smed_v6_10741_0_1	106	115	75	69	103	101	107.657	106.732	92.1181	71.9025	96.2696	86.1659	93.4741	-0.269606	0.243026	-1.10937	0.267269	0.999994	-1.20548	NO	NO	NO	NO
dd_Smed_v6_10741_0_2	181	200	162	198	255	261	183.829	185.62	198.975	206.329	238.337	222.666	205.96	0.234164	0.154439	1.51622	0.129464	0.999994	1.17623	NO	NO	NO	NO
dd_Smed_v6_10742_0_1	509	548	284	639	534	329	516.957	508.6	348.821	665.879	499.106	280.679	470.007	0.0713234	0.342738	0.208099	0.835152	0.999994	1.05068	NO	NO	NO	NO
dd_Smed_v6_10744_0_1	477	512	434	479	473	536	484.456	475.188	533.057	499.149	442.092	457.277	481.87	-0.0931021	0.114631	-0.81219	0.416683	0.999994	-1.06666	NO	NO	NO	NO
dd_Smed_v6_10745_0_1	205	228	145	212	209	247	208.205	211.607	178.095	220.918	195.343	210.723	204.148	0.06452	0.164032	0.393339	0.694069	0.999994	1.04574	NO	NO	NO	NO
dd_Smed_v6_10746_0_1	7	13	2	39	2	1	7.10942	12.0653	2.45648	40.6405	1.86931	0.853128	10.8324	0.990023	1.51725	0.65251	0.514072	0.999994	1.98622	NO	NO	1.98622	NO
dd_Smed_v6_10746_0_2	1	0	1	7	0	0	1.01563	0	1.22824	7.29445	0	0	1.58972	1.71148	3.06436	0.55851	0.576496	N/A	3.27496	NO	NO	3.27496	NO
dd_Smed_v6_10747_0_2	1	0	0	1	0	0	1.01563	0	0	1.04206	0	0	0.342949	-0.00826442	4.23567	-0.00195115	0.998443	N/A	-1.00574	NO	NO	NO	NO
dd_Smed_v6_10748_0_1	213	282	210	228	317	314	216.33	261.725	257.931	237.591	296.286	267.882	256.291	0.124925	0.172522	0.724109	0.468999	0.999994	1.09045	NO	NO	NO	NO
dd_Smed_v6_10749_0_1	46	55	16	55	45	51	46.7191	51.0456	19.6519	57.3136	42.0595	43.5095	43.3832	0.272216	0.484877	0.561412	0.574517	0.999994	1.20766	NO	NO	NO	NO
dd_Smed_v6_1075_0_1	1810	1937	1580	1554	1796	2221	1838.29	1797.73	1940.62	1619.37	1678.64	1894.8	1794.91	-0.101588	0.0879333	-1.15529	0.247972	0.999994	-1.07295	NO	NO	NO	NO
dd_Smed_v6_10750_0_1	48	52	33	35	54	58	48.7503	48.2613	40.532	36.4723	50.4714	49.4814	45.6615	-0.0117087	0.332267	-0.0352387	0.971889	0.999994	-1.00815	NO	NO	NO	NO
dd_Smed_v6_10750_1_1	160	193	153	185	157	203	162.501	179.124	187.921	192.782	146.741	173.185	173.709	-0.0467149	0.193531	-0.241382	0.809259	0.999994	-1.03291	NO	NO	NO	NO
dd_Smed_v6_10751_0_1	484	570	388	521	572	615	491.566	529.018	476.558	542.916	534.623	524.674	516.559	0.0954844	0.0991592	0.96294	0.335578	0.999994	1.06842	NO	NO	NO	NO
dd_Smed_v6_10752_0_1	306	310	263	291	338	343	310.783	287.712	323.028	303.241	315.914	292.623	305.55	-0.0135628	0.127245	-0.106587	0.915116	0.999994	-1.00945	NO	NO	NO	NO
dd_Smed_v6_10753_0_1	50	40	30	43	29	29	50.7816	37.1241	36.8473	44.8088	27.105	24.7407	36.9012	-0.375929	0.435059	-0.864088	0.387539	0.999994	-1.29768	NO	NO	NO	NO
dd_Smed_v6_10754_0_1	179	169	144	129	165	186	181.798	156.849	176.867	134.426	154.218	158.682	160.473	-0.200938	0.182182	-1.10295	0.270049	0.999994	-1.14945	NO	NO	NO	NO
dd_Smed_v6_10755_0_1	150	224	128	145	201	216	152.345	207.895	157.215	151.099	187.866	184.276	173.449	0.0146787	0.223643	0.0656344	0.947669	0.999994	1.01023	NO	NO	NO	NO
dd_Smed_v6_10756_0_1	85	100	59	75	90	99	86.3287	92.8102	72.4663	78.1549	84.119	84.4597	83.0565	-0.0322364	0.240305	-0.134148	0.893285	0.999994	-1.0226	NO	NO	NO	NO
dd_Smed_v6_10757_0_1	73	81	54	75	92	39	74.1411	75.1762	66.3251	78.1549	85.9884	33.272	68.8429	-0.131512	0.44322	-0.296719	0.766681	0.999994	-1.09544	NO	NO	NO	NO
dd_Smed_v6_10757_0_2	52	44	36	55	37	75	52.8129	40.8365	44.2167	57.3136	34.5823	63.9846	48.9577	0.178097	0.390255	0.456361	0.64813	0.999994	1.13139	NO	NO	NO	NO
dd_Smed_v6_10758_0_1	257	249	203	217	230	279	261.017	231.097	249.333	226.128	214.971	238.023	236.762	-0.125053	0.144741	-0.863981	0.387598	0.999994	-1.09055	NO	NO	NO	NO
dd_Smed_v6_10759_0_1	0	47	0	0	0	29	0	43.6208	0	0	0	24.7407	11.3936	-0.817756	3.4221	-0.238963	0.811134	0.999994	-1.76266	-1.76266	NO	NO	NO
dd_Smed_v6_10759_0_2	61	33	55	44	70	61	61.9536	30.6274	67.5533	45.8508	65.4259	52.0408	53.9086	0.0354147	0.435234	0.0813693	0.935148	0.999994	1.02485	NO	NO	NO	NO
dd_Smed_v6_10759_0_3	52	0	77	63	129	171	52.8129	0	94.5746	65.6501	120.571	145.885	79.9155	1.17474	1.25551	0.935667	0.349445	0.999994	2.25752	NO	NO	2.25752	NO
dd_Smed_v6_10759_0_4	47	130	26	56	8	0	47.7347	120.653	31.9343	58.3556	7.47725	0	44.3592	-1.61033	1.40613	-1.14522	0.252119	0.999994	-3.05321	-3.05321	NO	NO	NO
dd_Smed_v6_1076_0_1	1126	1366	1070	1153	1135	1419	1143.6	1267.79	1314.22	1201.5	1060.83	1210.59	1199.76	-0.100789	0.100387	-1.004	0.315377	0.999994	-1.07236	NO	NO	NO	NO
dd_Smed_v6_10760_0_1	232	264	185	221	282	260	235.627	245.019	227.225	230.296	263.573	221.813	237.259	0.0142197	0.151866	0.0936331	0.925401	0.999994	1.00991	NO	NO	NO	NO
dd_Smed_v6_10761_0_1	50	66	51	39	70	79	50.7816	61.2547	62.6403	40.6405	65.4259	67.3971	58.0234	-0.00462436	0.345634	-0.0133794	0.989325	0.999994	-1.00321	NO	NO	NO	NO
dd_Smed_v6_10762_0_1	226	250	170	247	229	266	229.533	232.025	208.801	257.39	214.036	226.932	228.12	0.0554973	0.158073	0.351088	0.725523	0.999994	1.03922	NO	NO	NO	NO
dd_Smed_v6_10763_0_1	17	14	8	17	7	7	17.2657	12.9934	9.82593	17.7151	6.54259	5.9719	11.7191	-0.42449	0.763863	-0.555715	0.578406	0.999994	-1.3421	NO	NO	NO	NO
dd_Smed_v6_10764_0_1	92	24	54	134	107	114	93.4382	22.2744	66.3251	139.637	100.008	97.2566	86.4898	0.890042	0.551224	1.61467	0.106383	0.999994	1.85323	NO	NO	1.85323	NO
dd_Smed_v6_10764_0_2	189	236	169	118	180	212	191.954	219.032	207.573	122.964	168.238	180.863	181.771	-0.387127	0.219154	-1.76646	0.0773179	0.981815	-1.30779	NO	NO	NO	NO
dd_Smed_v6_10764_0_3	31	41	7	0	0	0	31.4846	38.0522	8.59769	0	0	0	13.0224	-9.56141	2.80427	-3.40959	0.000650603	0.0770344	-755.562	-755.562	YES	NO	NO
dd_Smed_v6_10764_0_4	0	0	0	0	46	16	0	0	0	0	42.9942	13.65	9.4407	8.93365	3.33155	2.68153	0.00732867	0.308981	488.985	NO	NO	488.985	NO
dd_Smed_v6_10765_0_1	164	224	166	162	201	197	166.564	207.895	203.888	168.814	187.866	168.066	183.849	-0.139768	0.18199	-0.767997	0.442489	0.999994	-1.10173	NO	NO	NO	NO
dd_Smed_v6_10766_0_1	361	354	270	309	410	406	366.643	328.548	331.625	321.998	383.209	346.37	346.399	0.0348718	0.136782	0.254944	0.798767	0.999994	1.02447	NO	NO	NO	NO
dd_Smed_v6_10768_0_1	233	224	216	239	243	326	236.642	207.895	265.3	249.053	227.121	278.12	244.022	0.0916366	0.178268	0.514038	0.607226	0.999994	1.06558	NO	NO	NO	NO
dd_Smed_v6_10769_0_1	201	237	177	194	259	299	204.142	219.96	217.399	202.161	242.076	255.085	223.47	0.126876	0.167215	0.758762	0.447995	0.999994	1.09193	NO	NO	NO	NO
dd_Smed_v6_1077_0_1	2192	2472	1851	1890	2310	2698	2226.27	2294.27	2273.48	1969.5	2159.06	2301.74	2204.05	-0.0786387	0.0779419	-1.00894	0.313004	0.999994	-1.05602	NO	NO	NO	NO
dd_Smed_v6_10770_0_1	58	75	45	61	58	61	58.9067	69.6076	55.2709	63.5659	54.2101	52.0408	58.9337	-0.121132	0.287001	-0.42206	0.672981	0.999994	-1.08759	NO	NO	NO	NO
dd_Smed_v6_10771_0_1	148	137	136	149	170	195	150.314	127.15	167.041	155.268	158.892	166.36	154.171	0.117752	0.193508	0.608513	0.542847	0.999994	1.08504	NO	NO	NO	NO
dd_Smed_v6_10771_0_2	0	0	1	0	0	0	0	0	1.22824	0	0	0	0.204707	-3.51601	4.76036	-0.738603	0.460148	N/A	-11.44	-11.44	NO	NO	NO
dd_Smed_v6_10774_0_1	155	169	117	150	216	234	157.423	156.849	143.704	156.31	201.886	199.632	169.301	0.285162	0.194589	1.46546	0.142796	0.999994	1.21855	NO	NO	NO	NO
dd_Smed_v6_10776_0_1	210	212	203	214	222	206	213.283	196.758	249.333	223.002	207.494	175.744	210.936	-0.12008	0.19164	-0.626594	0.530926	0.999994	-1.0868	NO	NO	NO	NO
dd_Smed_v6_10777_0_1	249	321	189	420	261	270	252.892	297.921	232.138	437.667	243.945	230.345	282.485	0.217526	0.308055	0.706128	0.480109	0.999994	1.16274	NO	NO	NO	NO
dd_Smed_v6_10778_0_1	228	245	203	186	263	285	231.564	227.385	249.333	193.824	245.815	243.141	231.844	-0.0493083	0.170774	-0.288735	0.772784	0.999994	-1.03477	NO	NO	NO	NO
dd_Smed_v6_1078_1_1	1031	1110	909	904	968	1143	1047.12	1030.19	1116.47	942.026	904.747	975.125	1002.61	-0.176954	0.0788422	-2.2444	0.0248064	0.621711	-1.13049	NO	NO	NO	NO
dd_Smed_v6_10780_0_1	133	107	133	113	107	136	135.079	99.3069	163.356	117.753	100.008	116.025	121.922	-0.248276	0.272877	-0.909846	0.362904	0.999994	-1.18779	NO	NO	NO	NO
dd_Smed_v6_10781_0_1	14	9	14	14	33	36	14.2188	8.35292	17.1954	14.5889	30.8436	30.7126	19.3187	0.953682	0.615432	1.54961	0.121234	0.999994	1.93681	NO	NO	1.93681	NO
dd_Smed_v6_10781_0_2	102	100	105	92	132	131	103.594	92.8102	128.965	95.8699	123.375	111.76	109.396	0.03133	0.24989	0.125375	0.900227	0.999994	1.02195	NO	NO	NO	NO
dd_Smed_v6_10782_0_1	106	127	93	80	98	133	107.657	117.869	114.226	83.3652	91.5963	113.466	104.697	-0.232833	0.233669	-0.996423	0.319044	0.999994	-1.17514	NO	NO	NO	NO
dd_Smed_v6_10783_0_1	56	72	64	64	54	115	56.8754	66.8233	78.6075	66.6921	50.4714	98.1097	69.5966	0.0946273	0.374755	0.252504	0.800651	0.999994	1.06779	NO	NO	NO	NO
dd_Smed_v6_10784_0_1	131	122	120	108	146	164	133.048	113.228	147.389	112.543	136.46	139.913	130.43	-0.0114481	0.221593	-0.0516627	0.958797	0.999994	-1.00797	NO	NO	NO	NO
dd_Smed_v6_10785_0_1	564	616	375	527	734	673	572.816	571.711	460.591	549.168	686.038	574.155	569.08	0.171284	0.156584	1.09388	0.274006	0.999994	1.12606	NO	NO	NO	NO
dd_Smed_v6_10786_0_1	265	258	242	288	316	261	269.142	239.45	297.235	300.115	295.351	222.666	270.66	0.0222563	0.196199	0.113438	0.909684	0.999994	1.01555	NO	NO	NO	NO
dd_Smed_v6_10787_0_1	335	385	305	303	404	466	340.237	357.319	374.614	315.746	377.601	397.558	360.512	0.0277318	0.14629	0.189567	0.849648	0.999994	1.01941	NO	NO	NO	NO
dd_Smed_v6_10789_0_1	144	118	104	151	137	159	146.251	109.516	127.737	157.352	128.048	135.647	134.092	0.134536	0.222076	0.605812	0.54464	0.999994	1.09774	NO	NO	NO	NO
dd_Smed_v6_1079_0_1	1540	1623	1312	1410	1613	1836	1564.07	1506.31	1611.45	1469.31	1507.6	1566.34	1537.51	-0.0417225	0.0649474	-0.642405	0.52061	0.999994	-1.02934	NO	NO	NO	NO
dd_Smed_v6_10790_0_1	145	151	112	106	127	184	147.267	140.143	137.563	110.459	118.701	156.976	135.185	-0.135418	0.228269	-0.593239	0.553021	0.999994	-1.09841	NO	NO	NO	NO
dd_Smed_v6_10791_0_1	425	451	346	358	432	450	431.644	418.574	424.972	373.059	403.771	383.908	405.988	-0.135001	0.105634	-1.27801	0.201247	0.999994	-1.09809	NO	NO	NO	NO
dd_Smed_v6_10792_0_1	157	172	152	184	180	188	159.454	159.633	186.693	191.74	168.238	160.388	171.024	0.0421251	0.182834	0.230401	0.81778	0.999994	1.02963	NO	NO	NO	NO
dd_Smed_v6_10793_0_1	56	63	58	87	59	69	56.8754	58.4704	71.238	90.6596	55.1447	58.8658	65.209	0.132737	0.340698	0.389602	0.696831	0.999994	1.09637	NO	NO	NO	NO
dd_Smed_v6_10793_0_2	53	37	33	24	19	25	53.8285	34.3398	40.532	25.0096	17.7585	21.3282	32.1327	-1.008	0.421881	-2.38931	0.0168801	0.496423	-2.01113	-2.01113	NO	NO	NO
dd_Smed_v6_10794_0_1	345	401	305	359	433	478	350.393	372.169	374.614	374.101	404.706	407.795	380.63	0.114619	0.113425	1.01053	0.312243	0.999994	1.08269	NO	NO	NO	NO
dd_Smed_v6_10796_0_1	64	67	34	39	60	62	65.0005	62.1828	41.7602	40.6405	56.0794	52.8939	53.0929	-0.178694	0.349589	-0.511154	0.609243	0.999994	-1.13186	NO	NO	NO	NO
dd_Smed_v6_10796_0_2	171	182	163	163	176	224	173.673	168.915	200.203	169.857	164.499	191.101	178.041	-0.0422285	0.176955	-0.23864	0.811385	0.999994	-1.0297	NO	NO	NO	NO
dd_Smed_v6_10797_0_1	107	121	74	99	94	115	108.673	112.3	90.8899	103.164	87.8577	98.1097	100.166	-0.114144	0.225253	-0.506739	0.612338	0.999994	-1.08233	NO	NO	NO	NO
dd_Smed_v6_10798_0_1	193	208	136	149	172	208	196.017	193.045	167.041	155.268	160.761	177.451	174.93	-0.173561	0.173858	-0.998292	0.318138	0.999994	-1.12784	NO	NO	NO	NO
dd_Smed_v6_108_0_1	27790	29288	22771	23812	28724	34039	28224.4	27182.2	27968.3	24813.6	26847.1	29039.6	27345.9	-0.0469356	0.0655078	-0.716489	0.47369	0.999994	-1.03307	NO	NO	NO	NO
dd_Smed_v6_10801_0_1	106	98	86	76	91	106	107.657	90.954	105.629	79.1969	85.0537	90.4316	93.1537	-0.252225	0.224835	-1.12183	0.261937	0.999994	-1.19104	NO	NO	NO	NO
dd_Smed_v6_10802_0_1	447	519	374	480	509	490	453.988	481.685	459.362	500.191	475.74	418.033	464.833	-0.00328117	0.121419	-0.0270236	0.978441	0.999994	-1.00228	NO	NO	NO	NO
dd_Smed_v6_10803_0_1	122	175	97	164	125	178	123.907	162.418	119.139	170.899	116.832	151.857	140.842	0.112536	0.261158	0.430914	0.666531	0.999994	1.08113	NO	NO	NO	NO
dd_Smed_v6_10804_0_1	501	567	387	561	605	531	508.832	526.234	475.33	584.598	565.467	453.011	518.912	0.083593	0.145355	0.575095	0.565227	0.999994	1.05965	NO	NO	NO	NO
dd_Smed_v6_10805_0_1	129	139	100	173	167	186	131.017	129.006	122.824	180.277	156.088	158.682	146.316	0.367759	0.179715	2.04634	0.0407226	0.785188	1.29035	NO	NO	NO	NO
dd_Smed_v6_10805_0_2	10	7	6	8	8	16	10.1563	6.49671	7.36945	8.33652	7.47725	13.65	8.91438	0.301292	0.723823	0.416251	0.677227	0.999994	1.23225	NO	NO	NO	NO
dd_Smed_v6_10805_0_3	2	2	0	2	0	0	2.03126	1.8562	0	2.08413	0	0	0.995266	-0.944866	3.00425	-0.31451	0.753134	N/A	-1.92501	-1.92501	NO	NO	NO
dd_Smed_v6_10805_0_4	6	8	5	4	5	3	6.09379	7.42481	6.14121	4.16826	4.67328	2.55938	5.17679	-0.797456	0.8879	-0.898137	0.369112	N/A	-1.73803	-1.73803	NO	NO	NO
dd_Smed_v6_10805_0_5	0	0	0	0	0	2	0	0	0	0	0	1.70626	0.284376	3.89923	4.68472	0.832329	0.405223	N/A	14.9206	NO	NO	14.9206	NO
dd_Smed_v6_10806_0_1	225	214	136	182	309	302	228.517	198.614	167.041	189.656	288.809	257.645	221.713	0.308515	0.243242	1.26835	0.204674	0.999994	1.23843	NO	NO	NO	NO
dd_Smed_v6_10808_0_1	611	647	482	597	628	671	620.551	600.482	592.013	622.113	586.964	572.449	599.095	-0.0268639	0.091373	-0.294002	0.768756	0.999994	-1.0188	NO	NO	NO	NO
dd_Smed_v6_1081_0_1	6184	7097	5125	6788	7692	8835	6280.67	6586.74	6294.74	7073.53	7189.37	7537.38	6827.07	0.186063	0.0460211	4.043	5.27722e-05	0.0123844	1.13766	NO	NO	NO	NO
dd_Smed_v6_10811_0_1	215	247	187	188	244	283	218.361	229.241	229.681	195.908	228.056	241.435	223.78	-0.0229368	0.159285	-0.143998	0.885502	0.999994	-1.01603	NO	NO	NO	NO
dd_Smed_v6_10812_0_1	186	192	170	166	184	214	188.908	178.196	208.801	172.983	171.977	182.569	183.906	-0.122617	0.161986	-0.75696	0.449074	0.999994	-1.08871	NO	NO	NO	NO
dd_Smed_v6_10813_0_1	61	91	35	75	10	111	61.9536	84.4573	42.9885	78.1549	9.34656	94.6972	61.933	-0.0572601	0.800038	-0.0715717	0.942943	0.999994	-1.04049	NO	NO	NO	NO
dd_Smed_v6_10813_0_2	156	147	124	147	225	161	158.439	136.431	152.302	153.184	210.298	137.354	158.001	0.163994	0.245918	0.666866	0.504858	0.999994	1.12038	NO	NO	NO	NO
dd_Smed_v6_10813_0_3	0	0	18	0	30	2	0	0	22.1084	0	28.0397	1.70626	8.64238	0.434474	2.77738	0.156433	0.875692	0.999994	1.35142	NO	NO	NO	NO
dd_Smed_v6_10815_0_1	238	298	168	237	229	155	241.72	276.574	206.345	246.969	214.036	132.235	219.647	-0.292142	0.293807	-0.994333	0.320061	0.999994	-1.22446	NO	NO	NO	NO
dd_Smed_v6_10816_0_1	231	206	155	177	205	230	234.611	191.189	190.377	184.445	191.604	196.219	198.074	-0.106915	0.172305	-0.620498	0.53493	0.999994	-1.07692	NO	NO	NO	NO
dd_Smed_v6_10817_0_1	25	37	17	35	33	32	25.3908	34.3398	20.8801	36.4723	30.8436	27.3001	29.2044	0.218505	0.427087	0.511617	0.608919	0.999994	1.16353	NO	NO	NO	NO
dd_Smed_v6_10817_0_2	62	42	56	70	56	54	62.9692	38.9803	68.7815	72.9445	52.3407	46.0689	57.0142	0.00720787	0.393156	0.0183334	0.985373	0.999994	1.00501	NO	NO	NO	NO
dd_Smed_v6_10819_0_1	81	110	82	90	105	104	82.2662	102.091	100.716	93.7858	98.1389	88.7253	94.2872	-0.0224709	0.228066	-0.0985277	0.921513	0.999994	-1.0157	NO	NO	NO	NO
dd_Smed_v6_1082_0_1	64	107	71	83	100	123	65.0005	99.3069	87.2052	86.4914	93.4656	104.935	89.4007	0.180626	0.277647	0.650561	0.51533	0.999994	1.13338	NO	NO	NO	NO
dd_Smed_v6_10820_0_1	144	159	135	155	171	204	146.251	147.568	165.813	161.52	159.826	174.038	159.169	0.111962	0.171178	0.654067	0.513068	0.999994	1.0807	NO	NO	NO	NO
dd_Smed_v6_10822_0_1	318	351	264	323	432	474	322.971	325.764	324.256	336.587	403.771	404.383	352.955	0.236176	0.13562	1.74146	0.0816034	0.998364	1.17787	NO	NO	NO	NO
dd_Smed_v6_10823_0_1	85	95	22	115	114	0	86.3287	88.1697	27.0213	119.837	106.551	0	71.318	0.166382	1.3686	0.121571	0.903239	0.999994	1.12224	NO	NO	NO	NO
dd_Smed_v6_10823_0_2	57	58	87	100	60	113	57.891	53.8299	106.857	104.206	56.0794	96.4035	79.2112	0.237064	0.439304	0.539636	0.589448	0.999994	1.17859	NO	NO	NO	NO
dd_Smed_v6_10823_0_3	200	200	160	179	170	153	203.126	185.62	196.519	186.53	158.892	130.529	176.869	-0.301058	0.2069	-1.45509	0.145646	0.999994	-1.23205	NO	NO	NO	NO
dd_Smed_v6_10824_0_1	446	461	394	459	464	588	452.972	427.855	483.927	478.308	433.68	501.639	463.064	0.0529818	0.120659	0.439104	0.660586	0.999994	1.03741	NO	NO	NO	NO
dd_Smed_v6_10825_0_1	122	116	79	90	133	143	123.907	107.66	97.0311	93.7858	124.309	121.997	111.448	0.0498473	0.242399	0.205642	0.837071	0.999994	1.03516	NO	NO	NO	NO
dd_Smed_v6_10826_0_1	33	20	40	57	73	107	33.5159	18.562	49.1297	59.3977	68.2299	91.2847	53.3533	1.12624	0.472945	2.38133	0.0172503	0.502431	2.18289	NO	NO	2.18289	NO
dd_Smed_v6_10826_0_2	298	309	230	240	279	256	302.658	286.783	282.496	250.096	260.769	218.401	266.867	-0.259773	0.145178	-1.78934	0.0735606	0.962294	-1.19729	NO	NO	NO	NO
dd_Smed_v6_10827_0_1	40	64	34	53	57	40	40.6253	59.3985	41.7602	55.2294	53.2754	34.1251	47.4023	0.000458025	0.389923	0.00117466	0.999063	0.999994	1.00032	NO	NO	NO	NO
dd_Smed_v6_10827_0_2	120	112	105	129	146	141	121.876	103.947	128.965	134.426	136.46	120.291	124.328	0.143525	0.205166	0.699554	0.484206	0.999994	1.1046	NO	NO	NO	NO
dd_Smed_v6_10828_0_1	311	351	199	351	380	339	315.862	325.764	244.42	365.765	355.169	289.21	316.032	0.185188	0.190559	0.971814	0.331143	0.999994	1.13697	NO	NO	NO	NO
dd_Smed_v6_10828_0_2	244	321	283	262	291	320	247.814	297.921	347.592	273.021	271.985	273.001	285.222	-0.124565	0.176255	-0.706731	0.479734	0.999994	-1.09018	NO	NO	NO	NO
dd_Smed_v6_10829_0_1	162	183	136	180	200	215	164.532	169.843	167.041	187.572	186.931	183.422	176.557	0.153467	0.152348	1.00734	0.313769	0.999994	1.11224	NO	NO	NO	NO
dd_Smed_v6_10829_0_2	35	37	22	40	45	52	35.5471	34.3398	27.0213	41.6826	42.0595	44.3626	37.5022	0.397032	0.342972	1.15762	0.247018	0.999994	1.3168	NO	NO	NO	NO
dd_Smed_v6_10829_1_1	78	91	49	72	75	91	79.2193	84.4573	60.1838	75.0287	70.0992	77.6346	74.4372	-0.0130545	0.268394	-0.0486394	0.961207	0.999994	-1.00909	NO	NO	NO	NO
dd_Smed_v6_1083_0_1	902	874	824	780	674	770	916.1	811.161	1012.07	812.81	629.958	656.908	806.502	-0.383529	0.152353	-2.51736	0.0118236	0.40817	-1.30453	NO	NO	NO	NO
dd_Smed_v6_10830_0_2	19	30	19	20	20	25	19.297	27.8431	23.3366	20.8413	18.6931	21.3282	21.8899	-0.213944	0.449059	-0.476427	0.63377	0.999994	-1.15985	NO	NO	NO	NO
dd_Smed_v6_10831_0_1	245	281	176	317	254	172	248.83	260.797	216.171	330.334	237.403	146.738	240.045	-0.0253357	0.328126	-0.0772134	0.938454	0.999994	-1.01772	NO	NO	NO	NO
dd_Smed_v6_10832_0_1	185	232	183	230	298	334	187.892	215.32	224.768	239.675	278.527	284.945	238.521	0.357918	0.165278	2.16555	0.0303453	0.688071	1.28157	NO	NO	NO	NO
dd_Smed_v6_10833_0_1	483	504	393	486	505	448	490.55	467.763	482.699	506.443	472.001	382.201	466.943	-0.0842856	0.148287	-0.568397	0.569765	0.999994	-1.06016	NO	NO	NO	NO
dd_Smed_v6_10834_0_1	294	270	220	292	329	301	298.596	250.587	270.213	304.283	307.502	256.791	281.329	0.0832255	0.159574	0.521548	0.601985	0.999994	1.05938	NO	NO	NO	NO
dd_Smed_v6_10835_0_1	35	21	19	13	6	14	35.5471	19.4901	23.3366	13.5468	5.60794	11.9438	18.2454	-1.33643	0.621547	-2.15016	0.0315427	0.700584	-2.52525	-2.52525	NO	NO	NO
dd_Smed_v6_10835_0_2	0	24	0	109	32	0	0	22.2744	0	113.585	29.909	0	27.6281	2.68118	2.42788	1.10433	0.26945	0.999994	6.4138	NO	NO	6.4138	NO
dd_Smed_v6_10835_0_3	19	2	8	56	16	5	19.297	1.8562	9.82593	58.3556	14.9545	4.26564	18.0925	1.32328	1.19996	1.10277	0.270127	0.999994	2.50234	NO	NO	2.50234	NO
dd_Smed_v6_10837_0_1	356	399	310	359	389	434	361.565	370.313	380.755	374.101	363.581	370.257	370.095	-0.00542456	0.107399	-0.0505086	0.959717	0.999994	-1.00377	NO	NO	NO	NO
dd_Smed_v6_10840_0_1	156	155	155	158	172	208	158.439	143.856	190.377	164.646	160.761	177.451	165.922	0.0349641	0.194023	0.180206	0.856991	0.999994	1.02453	NO	NO	NO	NO
dd_Smed_v6_10841_0_1	402	387	281	366	356	389	408.284	359.175	345.136	381.396	332.738	331.867	359.766	-0.0914285	0.141092	-0.648008	0.51698	0.999994	-1.06542	NO	NO	NO	NO
dd_Smed_v6_10842_0_1	125	123	74	103	110	120	126.954	114.157	90.8899	107.333	102.812	102.375	107.42	-0.0922281	0.23115	-0.398996	0.689896	0.999994	-1.06602	NO	NO	NO	NO
dd_Smed_v6_10845_0_2	13	17	16	18	10	16	13.2032	15.7777	19.6519	18.7572	9.34656	13.65	15.0644	-0.219739	0.584811	-0.375743	0.707108	0.999994	-1.16452	NO	NO	NO	NO
dd_Smed_v6_10846_0_1	314	366	172	469	367	213	318.908	339.685	211.258	488.728	343.019	181.716	313.886	0.218302	0.395303	0.552241	0.580783	0.999994	1.16336	NO	NO	NO	NO
dd_Smed_v6_10848_0_1	306	269	237	237	312	341	310.783	249.659	291.093	246.969	291.613	290.917	280.172	-0.0350707	0.165652	-0.211714	0.83233	0.999994	-1.02461	NO	NO	NO	NO
dd_Smed_v6_10849_0_1	402	439	354	369	529	510	408.284	407.437	434.798	384.522	494.433	435.095	427.428	0.0733068	0.141848	0.516799	0.605296	0.999994	1.05213	NO	NO	NO	NO
dd_Smed_v6_1085_0_1	16	25	18	27	16	16	16.2501	23.2025	22.1084	28.1357	14.9545	13.65	19.7169	-0.12573	0.558654	-0.225059	0.821933	0.999994	-1.09106	NO	NO	NO	NO
dd_Smed_v6_10850_0_1	410	467	316	423	549	546	416.409	433.424	388.124	440.793	513.126	465.808	442.947	0.196443	0.121684	1.61437	0.106448	0.999994	1.14587	NO	NO	NO	NO
dd_Smed_v6_10851_0_1	249	254	219	219	260	292	252.892	235.738	268.985	228.212	243.011	249.113	246.325	-0.0690957	0.14179	-0.487311	0.626038	0.999994	-1.04906	NO	NO	NO	NO
dd_Smed_v6_10852_0_1	263	298	167	270	251	248	267.111	276.574	205.116	281.357	234.599	211.576	246.056	-0.0461392	0.209689	-0.220037	0.825842	0.999994	-1.0325	NO	NO	NO	NO
dd_Smed_v6_10852_0_3	35	66	56	78	44	68	35.5471	61.2547	68.7815	81.281	41.1249	58.0127	57.667	0.12402	0.446942	0.277485	0.781407	0.999994	1.08977	NO	NO	NO	NO
dd_Smed_v6_10853_0_1	6	21	0	9	4	15	6.09379	19.4901	0	9.37858	3.73862	12.7969	8.58301	0.00675644	1.38582	0.00487541	0.99611	0.999994	1.00469	NO	NO	NO	NO
dd_Smed_v6_10853_0_2	28	0	34	12	25	14	28.4377	0	41.7602	12.5048	23.3664	11.9438	19.6688	-0.549839	1.34176	-0.409789	0.681961	0.999994	-1.46392	-1.46392	NO	NO	NO
dd_Smed_v6_10853_0_3	2	0	0	0	5	0	2.03126	0	0	0	4.67328	0	1.11742	1.19545	3.92056	0.304919	0.760428	N/A	2.29017	NO	NO	2.29017	NO
dd_Smed_v6_10853_0_4	0	9	3	3	0	10	0	8.35292	3.68473	3.12619	0	8.53128	3.94919	-0.0458624	2.01479	-0.0227629	0.981839	N/A	-1.0323	NO	NO	NO	NO
dd_Smed_v6_10854_0_1	391	411	281	375	450	461	397.112	381.45	345.136	390.774	420.595	393.292	388.06	0.0983511	0.120023	0.819436	0.412538	0.999994	1.07055	NO	NO	NO	NO
dd_Smed_v6_10855_0_1	221	241	235	231	254	275	224.455	223.673	288.637	240.717	237.403	234.61	241.582	-0.0440217	0.172111	-0.255775	0.798125	0.999994	-1.03098	NO	NO	NO	NO
dd_Smed_v6_10857_0_1	241	261	168	269	318	346	244.767	242.235	206.345	280.315	297.221	295.182	261.011	0.329038	0.144514	2.27685	0.0227949	0.589748	1.25618	NO	NO	NO	NO
dd_Smed_v6_10858_0_1	229	243	169	210	284	313	232.58	225.529	207.573	218.834	265.442	267.029	236.164	0.174866	0.163489	1.06959	0.284804	0.999994	1.12886	NO	NO	NO	NO
dd_Smed_v6_10859_0_1	8	22	16	13	11	26	8.12506	20.4182	19.6519	13.5468	10.2812	22.1813	15.7008	-0.0603937	0.682389	-0.0885034	0.929477	0.999994	-1.04275	NO	NO	NO	NO
dd_Smed_v6_10859_0_2	117	128	130	117	155	131	118.829	118.797	159.671	121.922	144.872	111.76	129.308	-0.0658458	0.2436	-0.270303	0.786927	0.999994	-1.0467	NO	NO	NO	NO
dd_Smed_v6_1086_0_1	1639	1602	1408	1356	1730	1844	1664.62	1486.82	1729.36	1413.04	1616.95	1573.17	1580.66	-0.0831172	0.0976636	-0.851056	0.394738	0.999994	-1.0593	NO	NO	NO	NO
dd_Smed_v6_10861_0_1	335	398	217	350	397	438	340.237	369.384	266.528	364.723	371.058	373.67	347.6	0.181215	0.166521	1.08824	0.276487	0.999994	1.13384	NO	NO	NO	NO
dd_Smed_v6_10863_0_1	208	177	136	182	261	288	211.251	164.274	167.041	189.656	243.945	245.701	203.645	0.325277	0.21157	1.53744	0.124186	0.999994	1.2529	NO	NO	NO	NO
dd_Smed_v6_10863_0_2	19	18	26	8	10	16	19.297	16.7058	31.9343	8.33652	9.34656	13.65	16.545	-1.09909	0.600072	-1.8316	0.0670113	0.921244	-2.1422	-2.1422	NO	NO	NO
dd_Smed_v6_10864_0_1	312	335	298	290	400	419	316.877	310.914	366.016	302.199	373.862	357.461	337.888	0.060079	0.155728	0.385795	0.699648	0.999994	1.04252	NO	NO	NO	NO
dd_Smed_v6_10866_0_1	594	543	473	505	544	656	603.285	503.959	580.958	526.243	508.453	559.652	547.092	-0.0807408	0.120633	-0.669309	0.503298	0.999994	-1.05756	NO	NO	NO	NO
dd_Smed_v6_10868_0_1	61	68	72	70	106	93	61.9536	63.1109	88.4334	72.9445	99.0735	79.3409	77.4761	0.242498	0.30075	0.806311	0.420063	0.999994	1.18304	NO	NO	NO	NO
dd_Smed_v6_10869_0_1	178	177	126	148	186	212	180.783	164.274	154.758	154.226	173.846	180.863	168.125	0.0263332	0.177319	0.148507	0.881942	0.999994	1.01842	NO	NO	NO	NO
dd_Smed_v6_10869_0_2	1	2	1	1	3	2	1.01563	1.8562	1.22824	1.04206	2.80397	1.70626	1.60873	0.43345	1.50648	0.287724	0.773558	N/A	1.35046	NO	NO	NO	NO
dd_Smed_v6_1087_0_1	2576	2929	2143	2538	2879	3022	2616.27	2718.41	2632.12	2644.76	2690.87	2578.15	2646.76	-0.010289	0.0484119	-0.212531	0.831693	0.999994	-1.00716	NO	NO	NO	NO
dd_Smed_v6_10870_0_1	255	257	212	228	266	267	258.986	238.522	260.387	237.591	248.619	227.785	245.315	-0.0850245	0.138127	-0.615553	0.538189	0.999994	-1.06071	NO	NO	NO	NO
dd_Smed_v6_10872_0_1	467	586	392	460	452	547	474.3	543.868	481.471	479.35	422.465	466.661	478.019	-0.133783	0.121825	-1.09815	0.272139	0.999994	-1.09717	NO	NO	NO	NO
dd_Smed_v6_10872_0_2	98	132	66	70	96	116	99.5319	122.509	81.064	72.9445	89.727	98.9628	94.1233	-0.214481	0.285693	-0.750738	0.452811	0.999994	-1.16029	NO	NO	NO	NO
dd_Smed_v6_10873_0_1	129	122	99	102	120	134	131.017	113.228	121.596	106.291	112.159	114.319	116.435	-0.134763	0.196108	-0.687187	0.491965	0.999994	-1.09791	NO	NO	NO	NO
dd_Smed_v6_10874_0_1	23	23	11	17	9	10	23.3595	21.3463	13.5107	17.7151	8.4119	8.53128	15.4791	-0.765405	0.634531	-1.20625	0.22772	0.999994	-1.69985	-1.69985	NO	NO	NO
dd_Smed_v6_10875_0_1	43	35	29	26	33	41	43.6722	32.4836	35.619	27.0937	30.8436	34.9782	34.1151	-0.262594	0.372963	-0.704076	0.481386	0.999994	-1.19963	NO	NO	NO	NO
dd_Smed_v6_10876_0_1	120	130	106	93	102	158	121.876	120.653	130.194	96.912	95.3349	134.794	116.627	-0.184286	0.244023	-0.755201	0.450128	0.999994	-1.13625	NO	NO	NO	NO
dd_Smed_v6_10877_0_1	50	27	26	17	25	36	50.7816	25.0587	31.9343	17.7151	23.3664	30.7126	29.9281	-0.580417	0.506509	-1.14592	0.25183	0.999994	-1.49528	-1.49528	NO	NO	NO
dd_Smed_v6_10878_0_1	42	49	38	32	37	42	42.6565	45.477	46.6732	33.3461	34.5823	35.8314	39.7611	-0.375397	0.320091	-1.17278	0.240883	0.999994	-1.2972	NO	NO	NO	NO
dd_Smed_v6_10879_0_1	196	208	164	203	212	253	199.064	193.045	201.432	211.539	198.147	215.841	203.178	0.0768587	0.14632	0.525277	0.599391	0.999994	1.05472	NO	NO	NO	NO
dd_Smed_v6_1088_0_1	13433	14174	11760	13214	14562	15938	13643	13154.9	14444.1	13769.8	13610.5	13597.2	13703.2	-0.00898085	0.0459744	-0.195345	0.845123	0.999994	-1.00624	NO	NO	NO	NO
dd_Smed_v6_10880_0_1	53	57	33	79	51	45	53.8285	52.9018	40.532	82.3231	47.6675	38.3908	52.6073	0.185287	0.430934	0.429965	0.667221	0.999994	1.13704	NO	NO	NO	NO
dd_Smed_v6_10881_0_1	162	156	117	142	145	153	164.532	144.784	143.704	147.973	135.525	130.529	144.508	-0.132401	0.183441	-0.721763	0.47044	0.999994	-1.09612	NO	NO	NO	NO
dd_Smed_v6_10882_0_1	223	275	168	199	255	244	226.486	255.228	206.345	207.371	238.337	208.163	223.655	-0.0764855	0.169455	-0.451361	0.651729	0.999994	-1.05445	NO	NO	NO	NO
dd_Smed_v6_10882_0_2	29	15	81	36	63	72	29.4533	13.9215	99.4876	37.5143	58.8833	61.4252	50.1142	0.15171	0.762943	0.198849	0.842381	0.999994	1.11089	NO	NO	NO	NO
dd_Smed_v6_10883_0_1	265	272	238	267	280	327	269.142	252.444	292.322	278.231	261.704	278.973	272.136	0.0116957	0.136866	0.0854535	0.931901	0.999994	1.00814	NO	NO	NO	NO
dd_Smed_v6_10885_0_1	26	39	17	47	41	36	26.4064	36.196	20.8801	48.977	38.3209	30.7126	33.5822	0.486113	0.440616	1.10326	0.269915	0.999994	1.40067	NO	NO	1.40067	NO
dd_Smed_v6_10885_0_2	18	26	27	16	15	15	18.2814	24.1306	33.1625	16.673	14.0198	12.7969	19.8441	-0.79401	0.514963	-1.54188	0.123103	0.999994	-1.73389	-1.73389	NO	NO	NO
dd_Smed_v6_10885_0_3	92	103	60	67	77	117	93.4382	95.5945	73.6945	69.8183	71.9685	99.816	84.055	-0.12129	0.28961	-0.418805	0.675359	0.999994	-1.08771	NO	NO	NO	NO
dd_Smed_v6_10887_0_2	5	3	2	3	3	7	5.07816	2.78431	2.45648	3.12619	2.80397	5.9719	3.7035	0.209144	1.07413	0.19471	0.84562	N/A	1.156	NO	NO	NO	NO
dd_Smed_v6_10887_0_3	0	8	6	0	0	0	0	7.42481	7.36945	0	0	0	2.46571	-7.15427	3.5881	-1.99389	0.0461643	N/A	-142.445	-142.445	NO	NO	NO
dd_Smed_v6_10888_0_1	379	375	272	394	401	433	384.925	348.038	334.082	410.573	374.797	369.404	370.303	0.111653	0.127067	0.878693	0.379568	0.999994	1.08047	NO	NO	NO	NO
dd_Smed_v6_10889_0_1	551	617	408	617	644	509	559.613	572.639	501.123	642.954	601.918	434.242	552.082	0.0379127	0.186401	0.203393	0.838828	0.999994	1.02663	NO	NO	NO	NO
dd_Smed_v6_1089_0_1	2852	2915	2329	2480	2775	3162	2896.58	2705.42	2860.58	2584.32	2593.67	2697.59	2723.03	-0.102849	0.0545433	-1.88564	0.0593436	0.891022	-1.07389	NO	NO	NO	NO
dd_Smed_v6_10890_0_1	0	11	3	0	15	3	0	10.2091	3.68473	0	14.0198	2.55938	5.07884	0.251706	2.05412	0.122537	0.902474	N/A	1.19061	NO	NO	NO	NO
dd_Smed_v6_10890_0_2	59	52	45	49	34	67	59.9223	48.2613	55.2709	51.0612	31.7783	57.1596	50.5756	-0.221379	0.371664	-0.595644	0.551413	0.999994	-1.16585	NO	NO	NO	NO
dd_Smed_v6_10890_0_3	2	1	0	0	0	0	2.03126	0.928102	0	0	0	0	0.493228	-4.84286	4.64227	-1.04321	0.296852	N/A	-28.6976	-28.6976	NO	NO	NO
dd_Smed_v6_10890_0_4	5	4	2	3	3	6	5.07816	3.71241	2.45648	3.12619	2.80397	5.11877	3.716	-0.0285067	1.04361	-0.0273155	0.978208	N/A	-1.01996	NO	NO	NO	NO
dd_Smed_v6_10891_0_1	215	199	161	199	261	178	218.361	184.692	197.747	207.371	243.945	151.857	200.662	0.00458319	0.241663	0.0189652	0.984869	0.999994	1.00318	NO	NO	NO	NO
dd_Smed_v6_10892_0_1	266	258	215	211	315	363	270.158	239.45	264.072	219.876	294.417	309.685	266.276	0.0937193	0.193697	0.483846	0.628495	0.999994	1.06712	NO	NO	NO	NO
dd_Smed_v6_10893_0_1	76	80	37	69	126	197	77.188	74.2481	45.4449	71.9025	117.767	168.066	92.4361	0.85991	0.43327	1.9847	0.0471782	0.825218	1.81492	NO	NO	1.81492	NO
dd_Smed_v6_10893_0_2	415	400	353	423	385	268	421.487	371.241	433.569	440.793	359.843	228.638	375.929	-0.253769	0.268008	-0.946872	0.343704	0.999994	-1.19232	NO	NO	NO	NO
dd_Smed_v6_10894_0_1	249	276	220	316	262	318	252.892	256.156	270.213	329.292	244.88	271.295	270.788	0.116765	0.172739	0.675962	0.499065	0.999994	1.0843	NO	NO	NO	NO
dd_Smed_v6_10897_0_1	59	55	37	48	60	67	59.9223	51.0456	45.4449	50.0191	56.0794	57.1596	53.2785	0.0601532	0.296599	0.20281	0.839283	0.999994	1.04258	NO	NO	NO	NO
dd_Smed_v6_10898_0_1	207	233	170	221	257	265	210.236	216.248	208.801	230.296	240.207	226.079	221.978	0.131912	0.138202	0.954485	0.339838	0.999994	1.09574	NO	NO	NO	NO
dd_Smed_v6_10899_0_1	278	345	249	231	326	340	282.346	320.195	305.832	240.717	304.698	290.063	290.642	-0.119273	0.159373	-0.74839	0.454225	0.999994	-1.08619	NO	NO	NO	NO
dd_Smed_v6_1090_0_1	1043	1165	878	1003	863	1033	1059.3	1081.24	1078.4	1045.19	806.608	881.281	992.003	-0.236951	0.121476	-1.9506	0.0511045	0.852493	-1.1785	NO	NO	NO	NO
dd_Smed_v6_10900_0_1	150	214	165	207	211	255	152.345	198.614	202.66	215.707	197.212	217.548	197.348	0.188849	0.190523	0.991213	0.321581	0.999994	1.13985	NO	NO	NO	NO
dd_Smed_v6_10901_0_1	108	137	93	136	143	170	109.688	127.15	114.226	141.721	133.656	145.032	128.579	0.258343	0.189321	1.36458	0.172386	0.999994	1.1961	NO	NO	NO	NO
dd_Smed_v6_10902_0_1	221	248	173	221	293	315	224.455	230.169	212.486	230.296	273.854	268.735	239.999	0.212486	0.152492	1.39342	0.163492	0.999994	1.15868	NO	NO	NO	NO
dd_Smed_v6_10903_0_1	217	227	180	224	232	279	220.392	210.679	221.084	233.422	216.84	238.023	223.407	0.0789352	0.141477	0.557936	0.576888	0.999994	1.05624	NO	NO	NO	NO
dd_Smed_v6_10905_0_1	186	203	184	186	206	228	188.908	188.405	225.996	193.824	192.539	194.513	197.364	-0.050767	0.163222	-0.31103	0.755778	0.999994	-1.03582	NO	NO	NO	NO
dd_Smed_v6_10906_0_1	11	31	22	34	23	28	11.172	28.7712	27.0213	35.4302	21.4971	23.8876	24.6299	0.26949	0.57596	0.467898	0.639857	0.999994	1.20538	NO	NO	NO	NO
dd_Smed_v6_10906_0_2	24	3	7	0	0	4	24.3752	2.78431	8.59769	0	0	3.41251	6.52828	-3.34563	1.7374	-1.92565	0.0541478	0.861655	-10.1657	-10.1657	NO	NO	NO
dd_Smed_v6_10908_0_1	25	47	18	32	47	34	25.3908	43.6208	22.1084	33.3461	43.9288	29.0063	32.9002	0.212242	0.474307	0.447477	0.654531	0.999994	1.15849	NO	NO	NO	NO
dd_Smed_v6_1091_0_1	2811	2961	2450	2371	2884	2910	2854.94	2748.11	3009.19	2470.74	2695.55	2482.6	2710.19	-0.170375	0.0679566	-2.50711	0.0121722	0.415268	-1.12535	NO	NO	NO	NO
dd_Smed_v6_10910_0_1	284	308	264	301	331	337	288.44	285.855	324.256	313.661	309.371	287.504	301.515	0.0207499	0.132649	0.156427	0.875696	0.999994	1.01449	NO	NO	NO	NO
dd_Smed_v6_10911_0_1	199	236	214	172	243	206	202.111	219.032	262.844	179.235	227.121	175.744	211.015	-0.230235	0.206622	-1.11428	0.265159	0.999994	-1.17303	NO	NO	NO	NO
dd_Smed_v6_10911_0_2	216	233	125	286	266	190	219.377	216.248	153.53	298.03	248.619	162.094	216.316	0.26296	0.303879	0.865345	0.38685	0.999994	1.19994	NO	NO	NO	NO
dd_Smed_v6_10912_0_1	90	131	88	79	86	103	91.4069	121.581	108.085	82.3231	80.3804	87.8722	95.2749	-0.358004	0.236854	-1.5115	0.130662	0.999994	-1.28165	NO	NO	NO	NO
dd_Smed_v6_10914_0_1	55	43	84	61	94	115	55.8598	39.9084	103.172	63.5659	87.8577	98.1097	74.7456	0.335666	0.458441	0.73219	0.464052	0.999994	1.26196	NO	NO	NO	NO
dd_Smed_v6_10914_0_2	124	127	72	130	86	92	125.938	117.869	88.4334	135.468	80.3804	78.4878	104.43	-0.1806	0.340481	-0.530427	0.595816	0.999994	-1.13336	NO	NO	NO	NO
dd_Smed_v6_10915_0_1	176	221	136	195	250	302	178.751	205.11	167.041	203.203	233.664	257.645	207.569	0.333158	0.186791	1.78359	0.0744908	0.968882	1.25977	NO	NO	NO	NO
dd_Smed_v6_10916_0_1	137	176	125	158	188	199	139.142	163.346	153.53	164.646	175.715	169.772	161.025	0.161531	0.171425	0.942283	0.346048	0.999994	1.11847	NO	NO	NO	NO
dd_Smed_v6_10917_0_1	275	305	279	295	299	285	279.299	283.071	342.679	307.409	279.462	243.141	289.177	-0.124132	0.174113	-0.712939	0.475884	0.999994	-1.08985	NO	NO	NO	NO
dd_Smed_v6_10918_0_1	6	5	0	5	5	6	6.09379	4.64051	0	5.21032	4.67328	5.11877	4.28945	0.457025	1.25548	0.364023	0.715841	N/A	1.37271	NO	NO	NO	NO
dd_Smed_v6_10919_0_1	41	49	34	36	28	63	41.6409	45.477	41.7602	37.5143	26.1704	53.7471	41.0516	-0.131706	0.417066	-0.315791	0.752161	0.999994	-1.09559	NO	NO	NO	NO
dd_Smed_v6_1092_0_1	1377	1467	1117	1191	1602	1885	1398.53	1361.53	1371.95	1241.1	1497.32	1608.15	1413.09	0.0738724	0.116542	0.633871	0.526165	0.999994	1.05254	NO	NO	NO	NO
dd_Smed_v6_10921_0_1	507	644	479	549	725	706	514.925	597.698	588.328	572.094	677.626	602.308	592.163	0.123385	0.125408	0.983869	0.32518	0.999994	1.08929	NO	NO	NO	NO
dd_Smed_v6_10923_0_1	54	69	50	58	64	85	54.8441	64.039	61.4121	60.4398	59.818	72.5159	62.1781	0.0987261	0.274224	0.360019	0.718833	0.999994	1.07083	NO	NO	NO	NO
dd_Smed_v6_10924_0_1	380	404	307	402	438	543	385.94	374.953	377.07	418.91	409.379	463.248	404.917	0.183732	0.114562	1.60378	0.108762	0.999994	1.13582	NO	NO	NO	NO
dd_Smed_v6_10925_0_1	21	32	24	44	23	36	21.3283	29.6993	29.4778	45.8508	21.4971	30.7126	29.761	0.281442	0.487331	0.577517	0.56359	0.999994	1.21541	NO	NO	NO	NO
dd_Smed_v6_10925_0_2	41	49	38	37	36	43	41.6409	45.477	46.6732	38.5564	33.6476	36.6845	40.4466	-0.296973	0.320879	-0.925499	0.354707	0.999994	-1.22856	NO	NO	NO	NO
dd_Smed_v6_10926_0_1	379	396	300	395	445	418	384.925	367.528	368.473	411.616	415.922	356.607	384.178	0.0776198	0.125147	0.620231	0.535106	0.999994	1.05528	NO	NO	NO	NO
dd_Smed_v6_10927_0_1	256	285	217	245	279	352	260.002	264.509	266.528	255.306	260.769	300.301	267.903	0.0475887	0.142194	0.334674	0.737871	0.999994	1.03354	NO	NO	NO	NO
dd_Smed_v6_10928_0_1	9	6	6	6	5	6	9.14069	5.56861	7.36945	6.25239	4.67328	5.11877	6.35386	-0.461236	0.800241	-0.576372	0.564364	0.999994	-1.37672	NO	NO	NO	NO
dd_Smed_v6_10929_0_2	98	120	98	81	108	98	99.5319	111.372	120.368	84.4072	100.943	83.6065	100.038	-0.298482	0.227977	-1.30927	0.190444	0.999994	-1.22985	NO	NO	NO	NO
dd_Smed_v6_1093_0_1	217	202	161	160	169	174	220.392	187.477	197.747	166.73	157.957	148.444	179.791	-0.357473	0.169465	-2.10941	0.0349088	0.735355	-1.28118	NO	NO	NO	NO
dd_Smed_v6_1093_0_2	145	132	86	86	97	112	147.267	122.509	105.629	89.6176	90.6616	95.5503	108.539	-0.446923	0.233747	-1.912	0.0558765	0.872912	-1.36313	NO	NO	NO	NO
dd_Smed_v6_10930_0_1	3	6	6	4	18	13	3.0469	5.56861	7.36945	4.16826	16.8238	11.0907	8.01128	1.02075	0.918949	1.11078	0.266664	0.999994	2.02897	NO	NO	2.02897	NO
dd_Smed_v6_10930_0_2	84	88	76	73	72	97	85.3131	81.673	93.3464	76.0707	67.2952	82.7534	81.0753	-0.19939	0.241205	-0.82664	0.408441	0.999994	-1.14821	NO	NO	NO	NO
dd_Smed_v6_10933_0_1	0	11	5	5	6	4	0	10.2091	6.14121	5.21032	5.60794	3.41251	5.09685	-0.206193	1.37013	-0.150492	0.880377	N/A	-1.15364	NO	NO	NO	NO
dd_Smed_v6_10933_0_2	92	64	59	64	51	94	93.4382	59.3985	72.4663	66.6921	47.6675	80.194	69.9761	-0.209576	0.358085	-0.585269	0.558367	0.999994	-1.15635	NO	NO	NO	NO
dd_Smed_v6_10933_0_3	0	0	0	1	1	0	0	0	0	1.04206	0.934656	0	0.329453	4.08288	4.67024	0.874232	0.381992	N/A	16.946	NO	NO	16.946	NO
dd_Smed_v6_10934_0_1	312	319	220	291	321	394	316.877	296.064	270.213	303.241	300.025	336.132	303.759	0.088139	0.139573	0.631491	0.527719	0.999994	1.063	NO	NO	NO	NO
dd_Smed_v6_10935_0_1	301	365	234	340	353	405	305.705	338.757	287.409	354.302	329.934	345.517	326.937	0.140905	0.131283	1.07329	0.283142	0.999994	1.1026	NO	NO	NO	NO
dd_Smed_v6_10936_0_1	101	119	92	114	140	143	102.579	110.444	112.998	118.795	130.852	121.997	116.278	0.190446	0.193684	0.983285	0.325467	0.999994	1.14112	NO	NO	NO	NO
dd_Smed_v6_10936_0_2	14	23	9	15	16	7	14.2188	21.3463	11.0542	15.631	14.9545	5.9719	13.8628	-0.367371	0.693082	-0.530055	0.596074	0.999994	-1.29	NO	NO	NO	NO
dd_Smed_v6_10936_0_3	0	5	0	6	0	2	0	4.64051	0	6.25239	0	1.70626	2.09986	0.752273	2.80818	0.267886	0.788787	N/A	1.68445	NO	NO	1.68445	NO
dd_Smed_v6_10939_0_1	223	258	175	200	257	260	226.486	239.45	214.942	208.413	240.207	221.813	225.219	-0.0234809	0.150375	-0.15615	0.875915	0.999994	-1.01641	NO	NO	NO	NO
dd_Smed_v6_1094_0_1	2373	2272	1713	1585	3025	3352	2410.09	2108.65	2103.98	1651.67	2827.33	2859.68	2326.9	0.14835	0.213871	0.693643	0.487906	0.999994	1.1083	NO	NO	NO	NO
dd_Smed_v6_10941_0_1	0	0	0	0	0	0	0	0	0	0	0	0	0	#N/A	N/A	N/A	N/A	N/A	#N/A	#N/A	#N/A	#N/A	#N/A
dd_Smed_v6_10941_0_10	0	0	0	0	0	0	0	0	0	0	0	0	0	#N/A	N/A	N/A	N/A	N/A	#N/A	#N/A	#N/A	#N/A	#N/A
dd_Smed_v6_10941_0_100	0	0	0	12	0	0	0	0	0	12.5048	0	0	2.08413	6.75007	4.57928	1.47405	0.140469	N/A	107.64	NO	NO	107.64	NO
dd_Smed_v6_10941_0_101	0	0	0	0	0	0	0	0	0	0	0	0	0	#N/A	N/A	N/A	N/A	N/A	#N/A	#N/A	#N/A	#N/A	#N/A
dd_Smed_v6_10941_0_102	0	0	0	0	0	0	0	0	0	0	0	0	0	#N/A	N/A	N/A	N/A	N/A	#N/A	#N/A	#N/A	#N/A	#N/A
dd_Smed_v6_10941_0_103	0	0	0	0	0	0	0	0	0	0	0	0	0	#N/A	N/A	N/A	N/A	N/A	#N/A	#N/A	#N/A	#N/A	#N/A
dd_Smed_v6_10941_0_104	0	0	0	0	0	0	0	0	0	0	0	0	0	#N/A	N/A	N/A	N/A	N/A	#N/A	#N/A	#N/A	#N/A	#N/A
dd_Smed_v6_10941_0_105	0	0	0	0	0	0	0	0	0	0	0	0	0	#N/A	N/A	N/A	N/A	N/A	#N/A	#N/A	#N/A	#N/A	#N/A
dd_Smed_v6_10941_0_106	0	0	0	0	0	0	0	0	0	0	0	0	0	#N/A	N/A	N/A	N/A	N/A	#N/A	#N/A	#N/A	#N/A	#N/A
dd_Smed_v6_10941_0_107	0	0	0	0	0	0	0	0	0	0	0	0	0	#N/A	N/A	N/A	N/A	N/A	#N/A	#N/A	#N/A	#N/A	#N/A
dd_Smed_v6_10941_0_108	0	0	0	0	0	0	0	0	0	0	0	0	0	#N/A	N/A	N/A	N/A	N/A	#N/A	#N/A	#N/A	#N/A	#N/A
dd_Smed_v6_10941_0_109	0	0	0	0	0	0	0	0	0	0	0	0	0	#N/A	N/A	N/A	N/A	N/A	#N/A	#N/A	#N/A	#N/A	#N/A
dd_Smed_v6_10941_0_11	0	0	0	0	0	0	0	0	0	0	0	0	0	#N/A	N/A	N/A	N/A	N/A	#N/A	#N/A	#N/A	#N/A	#N/A
dd_Smed_v6_10941_0_110	0	0	0	0	0	0	0	0	0	0	0	0	0	#N/A	N/A	N/A	N/A	N/A	#N/A	#N/A	#N/A	#N/A	#N/A
dd_Smed_v6_10941_0_111	0	0	0	0	0	0	0	0	0	0	0	0	0	#N/A	N/A	N/A	N/A	N/A	#N/A	#N/A	#N/A	#N/A	#N/A
dd_Smed_v6_10941_0_112	0	0	0	0	0	0	0	0	0	0	0	0	0	#N/A	N/A	N/A	N/A	N/A	#N/A	#N/A	#N/A	#N/A	#N/A
dd_Smed_v6_10941_0_113	0	0	0	0	0	0	0	0	0	0	0	0	0	#N/A	N/A	N/A	N/A	N/A	#N/A	#N/A	#N/A	#N/A	#N/A
dd_Smed_v6_10941_0_114	0	0	0	0	0	0	0	0	0	0	0	0	0	#N/A	N/A	N/A	N/A	N/A	#N/A	#N/A	#N/A	#N/A	#N/A
dd_Smed_v6_10941_0_115	0	0	0	0	0	0	0	0	0	0	0	0	0	#N/A	N/A	N/A	N/A	N/A	#N/A	#N/A	#N/A	#N/A	#N/A
dd_Smed_v6_10941_0_116	0	0	0	0	0	0	0	0	0	0	0	0	0	#N/A	N/A	N/A	N/A	N/A	#N/A	#N/A	#N/A	#N/A	#N/A
dd_Smed_v6_10941_0_117	0	0	0	0	0	3	0	0	0	0	0	2.55938	0.426564	4.47843	4.64455	0.964234	0.334928	N/A	22.2916	NO	NO	22.2916	NO
dd_Smed_v6_10941_0_118	0	0	0	0	0	0	0	0	0	0	0	0	0	#N/A	N/A	N/A	N/A	N/A	#N/A	#N/A	#N/A	#N/A	#N/A
dd_Smed_v6_10941_0_119	0	0	0	0	0	0	0	0	0	0	0	0	0	#N/A	N/A	N/A	N/A	N/A	#N/A	#N/A	#N/A	#N/A	#N/A
dd_Smed_v6_10941_0_12	0	0	0	0	0	0	0	0	0	0	0	0	0	#N/A	N/A	N/A	N/A	N/A	#N/A	#N/A	#N/A	#N/A	#N/A
dd_Smed_v6_10941_0_120	0	0	0	0	0	0	0	0	0	0	0	0	0	#N/A	N/A	N/A	N/A	N/A	#N/A	#N/A	#N/A	#N/A	#N/A
dd_Smed_v6_10941_0_121	0	0	0	0	0	0	0	0	0	0	0	0	0	#N/A	N/A	N/A	N/A	N/A	#N/A	#N/A	#N/A	#N/A	#N/A
dd_Smed_v6_10941_0_122	0	0	0	0	0	0	0	0	0	0	0	0	0	#N/A	N/A	N/A	N/A	N/A	#N/A	#N/A	#N/A	#N/A	#N/A
dd_Smed_v6_10941_0_123	0	0	0	0	0	0	0	0	0	0	0	0	0	#N/A	N/A	N/A	N/A	N/A	#N/A	#N/A	#N/A	#N/A	#N/A
dd_Smed_v6_10941_0_124	0	0	0	0	1	0	0	0	0	0	0.934656	0	0.155776	3.01414	4.78601	0.62978	0.528838	N/A	8.07877	NO	NO	8.07877	NO
dd_Smed_v6_10941_0_125	0	0	0	0	0	0	0	0	0	0	0	0	0	#N/A	N/A	N/A	N/A	N/A	#N/A	#N/A	#N/A	#N/A	#N/A
dd_Smed_v6_10941_0_126	0	0	0	0	2	0	0	0	0	0	1.86931	0	0.311552	4.01314	4.67553	0.858328	0.390711	N/A	16.1464	NO	NO	16.1464	NO
dd_Smed_v6_10941_0_127	0	34	0	0	0	0	0	31.5555	0	0	0	0	5.25924	-8.25026	4.44858	-1.85458	0.0636559	N/A	-304.493	-304.493	NO	NO	NO
dd_Smed_v6_10941_0_128	0	0	0	0	0	0	0	0	0	0	0	0	0	#N/A	N/A	N/A	N/A	N/A	#N/A	#N/A	#N/A	#N/A	#N/A
dd_Smed_v6_10941_0_129	0	0	0	0	0	0	0	0	0	0	0	0	0	#N/A	N/A	N/A	N/A	N/A	#N/A	#N/A	#N/A	#N/A	#N/A
dd_Smed_v6_10941_0_13	0	0	0	0	0	0	0	0	0	0	0	0	0	#N/A	N/A	N/A	N/A	N/A	#N/A	#N/A	#N/A	#N/A	#N/A
dd_Smed_v6_10941_0_130	0	0	0	0	0	0	0	0	0	0	0	0	0	#N/A	N/A	N/A	N/A	N/A	#N/A	#N/A	#N/A	#N/A	#N/A
dd_Smed_v6_10941_0_131	0	0	0	0	0	0	0	0	0	0	0	0	0	#N/A	N/A	N/A	N/A	N/A	#N/A	#N/A	#N/A	#N/A	#N/A
dd_Smed_v6_10941_0_132	0	0	0	0	0	0	0	0	0	0	0	0	0	#N/A	N/A	N/A	N/A	N/A	#N/A	#N/A	#N/A	#N/A	#N/A
dd_Smed_v6_10941_0_133	0	0	0	0	0	0	0	0	0	0	0	0	0	#N/A	N/A	N/A	N/A	N/A	#N/A	#N/A	#N/A	#N/A	#N/A
dd_Smed_v6_10941_0_134	0	0	0	0	0	0	0	0	0	0	0	0	0	#N/A	N/A	N/A	N/A	N/A	#N/A	#N/A	#N/A	#N/A	#N/A
dd_Smed_v6_10941_0_135	0	0	0	0	0	0	0	0	0	0	0	0	0	#N/A	N/A	N/A	N/A	N/A	#N/A	#N/A	#N/A	#N/A	#N/A
dd_Smed_v6_10941_0_136	0	0	0	0	0	0	0	0	0	0	0	0	0	#N/A	N/A	N/A	N/A	N/A	#N/A	#N/A	#N/A	#N/A	#N/A
dd_Smed_v6_10941_0_137	0	0	0	0	0	0	0	0	0	0	0	0	0	#N/A	N/A	N/A	N/A	N/A	#N/A	#N/A	#N/A	#N/A	#N/A
dd_Smed_v6_10941_0_138	0	0	0	0	0	0	0	0	0	0	0	0	0	#N/A	N/A	N/A	N/A	N/A	#N/A	#N/A	#N/A	#N/A	#N/A
dd_Smed_v6_10941_0_139	0	0	0	0	0	0	0	0	0	0	0	0	0	#N/A	N/A	N/A	N/A	N/A	#N/A	#N/A	#N/A	#N/A	#N/A
dd_Smed_v6_10941_0_14	0	0	0	0	0	0	0	0	0	0	0	0	0	#N/A	N/A	N/A	N/A	N/A	#N/A	#N/A	#N/A	#N/A	#N/A
dd_Smed_v6_10941_0_140	0	0	0	0	0	0	0	0	0	0	0	0	0	#N/A	N/A	N/A	N/A	N/A	#N/A	#N/A	#N/A	#N/A	#N/A
dd_Smed_v6_10941_0_141	0	0	0	0	0	0	0	0	0	0	0	0	0	#N/A	N/A	N/A	N/A	N/A	#N/A	#N/A	#N/A	#N/A	#N/A
dd_Smed_v6_10941_0_142	0	0	0	0	0	0	0	0	0	0	0	0	0	#N/A	N/A	N/A	N/A	N/A	#N/A	#N/A	#N/A	#N/A	#N/A
dd_Smed_v6_10941_0_143	0	0	0	0	0	0	0	0	0	0	0	0	0	#N/A	N/A	N/A	N/A	N/A	#N/A	#N/A	#N/A	#N/A	#N/A
dd_Smed_v6_10941_0_144	0	0	0	0	0	0	0	0	0	0	0	0	0	#N/A	N/A	N/A	N/A	N/A	#N/A	#N/A	#N/A	#N/A	#N/A
dd_Smed_v6_10941_0_145	0	0	0	0	0	0	0	0	0	0	0	0	0	#N/A	N/A	N/A	N/A	N/A	#N/A	#N/A	#N/A	#N/A	#N/A
dd_Smed_v6_10941_0_146	0	0	0	0	0	0	0	0	0	0	0	0	0	#N/A	N/A	N/A	N/A	N/A	#N/A	#N/A	#N/A	#N/A	#N/A
dd_Smed_v6_10941_0_147	0	0	0	0	0	0	0	0	0	0	0	0	0	#N/A	N/A	N/A	N/A	N/A	#N/A	#N/A	#N/A	#N/A	#N/A
dd_Smed_v6_10941_0_148	0	0	0	0	0	0	0	0	0	0	0	0	0	#N/A	N/A	N/A	N/A	N/A	#N/A	#N/A	#N/A	#N/A	#N/A
dd_Smed_v6_10941_0_149	0	0	0	0	0	0	0	0	0	0	0	0	0	#N/A	N/A	N/A	N/A	N/A	#N/A	#N/A	#N/A	#N/A	#N/A
dd_Smed_v6_10941_0_15	0	0	0	0	0	0	0	0	0	0	0	0	0	#N/A	N/A	N/A	N/A	N/A	#N/A	#N/A	#N/A	#N/A	#N/A
dd_Smed_v6_10941_0_150	0	0	0	0	0	0	0	0	0	0	0	0	0	#N/A	N/A	N/A	N/A	N/A	#N/A	#N/A	#N/A	#N/A	#N/A
dd_Smed_v6_10941_0_151	0	0	0	0	0	0	0	0	0	0	0	0	0	#N/A	N/A	N/A	N/A	N/A	#N/A	#N/A	#N/A	#N/A	#N/A
dd_Smed_v6_10941_0_152	0	0	0	0	0	0	0	0	0	0	0	0	0	#N/A	N/A	N/A	N/A	N/A	#N/A	#N/A	#N/A	#N/A	#N/A
dd_Smed_v6_10941_0_153	0	0	0	0	0	0	0	0	0	0	0	0	0	#N/A	N/A	N/A	N/A	N/A	#N/A	#N/A	#N/A	#N/A	#N/A
dd_Smed_v6_10941_0_154	0	0	0	0	0	0	0	0	0	0	0	0	0	#N/A	N/A	N/A	N/A	N/A	#N/A	#N/A	#N/A	#N/A	#N/A
dd_Smed_v6_10941_0_155	0	0	0	0	0	0	0	0	0	0	0	0	0	#N/A	N/A	N/A	N/A	N/A	#N/A	#N/A	#N/A	#N/A	#N/A
dd_Smed_v6_10941_0_156	0	0	3	0	0	0	0	0	3.68473	0	0	0	0.614121	-5.13146	4.62785	-1.10882	0.267507	N/A	-35.0529	-35.0529	NO	NO	NO
dd_Smed_v6_10941_0_157	0	0	0	0	0	0	0	0	0	0	0	0	0	#N/A	N/A	N/A	N/A	N/A	#N/A	#N/A	#N/A	#N/A	#N/A
dd_Smed_v6_10941_0_158	0	0	0	0	0	0	0	0	0	0	0	0	0	#N/A	N/A	N/A	N/A	N/A	#N/A	#N/A	#N/A	#N/A	#N/A
dd_Smed_v6_10941_0_159	0	0	0	0	0	0	0	0	0	0	0	0	0	#N/A	N/A	N/A	N/A	N/A	#N/A	#N/A	#N/A	#N/A	#N/A
dd_Smed_v6_10941_0_16	0	0	0	0	0	0	0	0	0	0	0	0	0	#N/A	N/A	N/A	N/A	N/A	#N/A	#N/A	#N/A	#N/A	#N/A
dd_Smed_v6_10941_0_160	0	0	0	0	0	0	0	0	0	0	0	0	0	#N/A	N/A	N/A	N/A	N/A	#N/A	#N/A	#N/A	#N/A	#N/A
dd_Smed_v6_10941_0_161	0	0	0	0	0	0	0	0	0	0	0	0	0	#N/A	N/A	N/A	N/A	N/A	#N/A	#N/A	#N/A	#N/A	#N/A
dd_Smed_v6_10941_0_162	0	0	0	0	0	0	0	0	0	0	0	0	0	#N/A	N/A	N/A	N/A	N/A	#N/A	#N/A	#N/A	#N/A	#N/A
dd_Smed_v6_10941_0_163	0	0	0	0	0	0	0	0	0	0	0	0	0	#N/A	N/A	N/A	N/A	N/A	#N/A	#N/A	#N/A	#N/A	#N/A
dd_Smed_v6_10941_0_164	0	0	0	0	0	0	0	0	0	0	0	0	0	#N/A	N/A	N/A	N/A	N/A	#N/A	#N/A	#N/A	#N/A	#N/A
dd_Smed_v6_10941_0_165	0	0	0	0	0	0	0	0	0	0	0	0	0	#N/A	N/A	N/A	N/A	N/A	#N/A	#N/A	#N/A	#N/A	#N/A
dd_Smed_v6_10941_0_166	0	0	0	0	0	0	0	0	0	0	0	0	0	#N/A	N/A	N/A	N/A	N/A	#N/A	#N/A	#N/A	#N/A	#N/A
dd_Smed_v6_10941_0_167	0	0	0	0	0	0	0	0	0	0	0	0	0	#N/A	N/A	N/A	N/A	N/A	#N/A	#N/A	#N/A	#N/A	#N/A
dd_Smed_v6_10941_0_168	0	0	0	0	0	0	0	0	0	0	0	0	0	#N/A	N/A	N/A	N/A	N/A	#N/A	#N/A	#N/A	#N/A	#N/A
dd_Smed_v6_10941_0_169	0	0	0	0	0	0	0	0	0	0	0	0	0	#N/A	N/A	N/A	N/A	N/A	#N/A	#N/A	#N/A	#N/A	#N/A
dd_Smed_v6_10941_0_17	0	0	0	0	0	0	0	0	0	0	0	0	0	#N/A	N/A	N/A	N/A	N/A	#N/A	#N/A	#N/A	#N/A	#N/A
dd_Smed_v6_10941_0_170	0	0	0	0	0	0	0	0	0	0	0	0	0	#N/A	N/A	N/A	N/A	N/A	#N/A	#N/A	#N/A	#N/A	#N/A
dd_Smed_v6_10941_0_171	0	0	0	0	0	0	0	0	0	0	0	0	0	#N/A	N/A	N/A	N/A	N/A	#N/A	#N/A	#N/A	#N/A	#N/A
dd_Smed_v6_10941_0_172	0	0	0	0	0	0	0	0	0	0	0	0	0	#N/A	N/A	N/A	N/A	N/A	#N/A	#N/A	#N/A	#N/A	#N/A
dd_Smed_v6_10941_0_173	0	0	0	0	0	0	0	0	0	0	0	0	0	#N/A	N/A	N/A	N/A	N/A	#N/A	#N/A	#N/A	#N/A	#N/A
dd_Smed_v6_10941_0_174	0	0	0	0	0	0	0	0	0	0	0	0	0	#N/A	N/A	N/A	N/A	N/A	#N/A	#N/A	#N/A	#N/A	#N/A
dd_Smed_v6_10941_0_175	0	0	0	0	0	0	0	0	0	0	0	0	0	#N/A	N/A	N/A	N/A	N/A	#N/A	#N/A	#N/A	#N/A	#N/A
dd_Smed_v6_10941_0_176	0	0	0	0	0	0	0	0	0	0	0	0	0	#N/A	N/A	N/A	N/A	N/A	#N/A	#N/A	#N/A	#N/A	#N/A
dd_Smed_v6_10941_0_177	0	0	0	0	0	0	0	0	0	0	0	0	0	#N/A	N/A	N/A	N/A	N/A	#N/A	#N/A	#N/A	#N/A	#N/A
dd_Smed_v6_10941_0_178	0	0	0	0	0	0	0	0	0	0	0	0	0	#N/A	N/A	N/A	N/A	N/A	#N/A	#N/A	#N/A	#N/A	#N/A
dd_Smed_v6_10941_0_179	0	0	0	0	0	0	0	0	0	0	0	0	0	#N/A	N/A	N/A	N/A	N/A	#N/A	#N/A	#N/A	#N/A	#N/A
dd_Smed_v6_10941_0_18	0	0	0	0	0	0	0	0	0	0	0	0	0	#N/A	N/A	N/A	N/A	N/A	#N/A	#N/A	#N/A	#N/A	#N/A
dd_Smed_v6_10941_0_180	0	0	0	0	0	0	0	0	0	0	0	0	0	#N/A	N/A	N/A	N/A	N/A	#N/A	#N/A	#N/A	#N/A	#N/A
dd_Smed_v6_10941_0_181	0	0	0	0	0	0	0	0	0	0	0	0	0	#N/A	N/A	N/A	N/A	N/A	#N/A	#N/A	#N/A	#N/A	#N/A
dd_Smed_v6_10941_0_182	0	0	0	0	0	0	0	0	0	0	0	0	0	#N/A	N/A	N/A	N/A	N/A	#N/A	#N/A	#N/A	#N/A	#N/A
dd_Smed_v6_10941_0_183	0	0	0	0	0	0	0	0	0	0	0	0	0	#N/A	N/A	N/A	N/A	N/A	#N/A	#N/A	#N/A	#N/A	#N/A
dd_Smed_v6_10941_0_184	0	0	0	0	0	0	0	0	0	0	0	0	0	#N/A	N/A	N/A	N/A	N/A	#N/A	#N/A	#N/A	#N/A	#N/A
dd_Smed_v6_10941_0_185	0	0	0	0	0	0	0	0	0	0	0	0	0	#N/A	N/A	N/A	N/A	N/A	#N/A	#N/A	#N/A	#N/A	#N/A
dd_Smed_v6_10941_0_186	0	0	0	0	0	0	0	0	0	0	0	0	0	#N/A	N/A	N/A	N/A	N/A	#N/A	#N/A	#N/A	#N/A	#N/A
dd_Smed_v6_10941_0_187	0	0	0	0	0	0	0	0	0	0	0	0	0	#N/A	N/A	N/A	N/A	N/A	#N/A	#N/A	#N/A	#N/A	#N/A
dd_Smed_v6_10941_0_188	0	0	0	0	0	0	0	0	0	0	0	0	0	#N/A	N/A	N/A	N/A	N/A	#N/A	#N/A	#N/A	#N/A	#N/A
dd_Smed_v6_10941_0_189	0	0	0	0	0	0	0	0	0	0	0	0	0	#N/A	N/A	N/A	N/A	N/A	#N/A	#N/A	#N/A	#N/A	#N/A
dd_Smed_v6_10941_0_19	0	0	0	7	0	0	0	0	0	7.29445	0	0	1.21574	5.97016	4.59158	1.30024	0.193518	N/A	62.6899	NO	NO	62.6899	NO
dd_Smed_v6_10941_0_190	0	0	0	0	0	0	0	0	0	0	0	0	0	#N/A	N/A	N/A	N/A	N/A	#N/A	#N/A	#N/A	#N/A	#N/A
dd_Smed_v6_10941_0_191	0	0	0	0	0	0	0	0	0	0	0	0	0	#N/A	N/A	N/A	N/A	N/A	#N/A	#N/A	#N/A	#N/A	#N/A
dd_Smed_v6_10941_0_192	0	0	0	0	0	0	0	0	0	0	0	0	0	#N/A	N/A	N/A	N/A	N/A	#N/A	#N/A	#N/A	#N/A	#N/A
dd_Smed_v6_10941_0_193	0	0	0	0	0	0	0	0	0	0	0	0	0	#N/A	N/A	N/A	N/A	N/A	#N/A	#N/A	#N/A	#N/A	#N/A
dd_Smed_v6_10941_0_194	0	0	0	0	0	0	0	0	0	0	0	0	0	#N/A	N/A	N/A	N/A	N/A	#N/A	#N/A	#N/A	#N/A	#N/A
dd_Smed_v6_10941_0_195	8	0	0	0	0	0	8.12506	0	0	0	0	0	1.35418	-6.29307	4.59162	-1.37055	0.170514	N/A	-78.4159	-78.4159	NO	NO	NO
dd_Smed_v6_10941_0_196	1	0	0	0	0	0	1.01563	0	0	0	0	0	0.169272	-3.30343	4.791	-0.689508	0.490504	N/A	-9.8726	-9.8726	NO	NO	NO
dd_Smed_v6_10941_0_197	3	0	0	0	0	0	3.0469	0	0	0	0	0	0.507816	-4.88114	4.64019	-1.05193	0.292833	N/A	-29.4694	-29.4694	NO	NO	NO
dd_Smed_v6_10941_0_198	0	0	0	0	0	0	0	0	0	0	0	0	0	#N/A	N/A	N/A	N/A	N/A	#N/A	#N/A	#N/A	#N/A	#N/A
dd_Smed_v6_10941_0_199	1	0	0	0	0	0	1.01563	0	0	0	0	0	0.169272	-3.30343	4.791	-0.689508	0.490504	N/A	-9.8726	-9.8726	NO	NO	NO
dd_Smed_v6_10941_0_2	0	0	0	0	0	0	0	0	0	0	0	0	0	#N/A	N/A	N/A	N/A	N/A	#N/A	#N/A	#N/A	#N/A	#N/A
dd_Smed_v6_10941_0_20	0	0	0	0	0	0	0	0	0	0	0	0	0	#N/A	N/A	N/A	N/A	N/A	#N/A	#N/A	#N/A	#N/A	#N/A
dd_Smed_v6_10941_0_200	0	0	0	0	0	0	0	0	0	0	0	0	0	#N/A	N/A	N/A	N/A	N/A	#N/A	#N/A	#N/A	#N/A	#N/A
dd_Smed_v6_10941_0_201	0	0	0	0	0	0	0	0	0	0	0	0	0	#N/A	N/A	N/A	N/A	N/A	#N/A	#N/A	#N/A	#N/A	#N/A
dd_Smed_v6_10941_0_202	0	0	0	0	0	0	0	0	0	0	0	0	0	#N/A	N/A	N/A	N/A	N/A	#N/A	#N/A	#N/A	#N/A	#N/A
dd_Smed_v6_10941_0_203	0	0	0	0	0	0	0	0	0	0	0	0	0	#N/A	N/A	N/A	N/A	N/A	#N/A	#N/A	#N/A	#N/A	#N/A
dd_Smed_v6_10941_0_204	0	0	0	0	0	0	0	0	0	0	0	0	0	#N/A	N/A	N/A	N/A	N/A	#N/A	#N/A	#N/A	#N/A	#N/A
dd_Smed_v6_10941_0_205	0	0	0	0	0	0	0	0	0	0	0	0	0	#N/A	N/A	N/A	N/A	N/A	#N/A	#N/A	#N/A	#N/A	#N/A
dd_Smed_v6_10941_0_206	0	0	0	0	0	0	0	0	0	0	0	0	0	#N/A	N/A	N/A	N/A	N/A	#N/A	#N/A	#N/A	#N/A	#N/A
dd_Smed_v6_10941_0_207	0	0	0	0	0	0	0	0	0	0	0	0	0	#N/A	N/A	N/A	N/A	N/A	#N/A	#N/A	#N/A	#N/A	#N/A
dd_Smed_v6_10941_0_208	0	0	0	0	0	0	0	0	0	0	0	0	0	#N/A	N/A	N/A	N/A	N/A	#N/A	#N/A	#N/A	#N/A	#N/A
dd_Smed_v6_10941_0_209	0	0	0	0	0	0	0	0	0	0	0	0	0	#N/A	N/A	N/A	N/A	N/A	#N/A	#N/A	#N/A	#N/A	#N/A
dd_Smed_v6_10941_0_21	0	0	0	0	0	0	0	0	0	0	0	0	0	#N/A	N/A	N/A	N/A	N/A	#N/A	#N/A	#N/A	#N/A	#N/A
dd_Smed_v6_10941_0_210	0	13	0	0	0	11	0	12.0653	0	0	0	9.38441	3.57495	-0.363007	3.69305	-0.0982946	0.921698	N/A	-1.2861	NO	NO	NO	NO
dd_Smed_v6_10941_0_211	0	0	0	0	0	0	0	0	0	0	0	0	0	#N/A	N/A	N/A	N/A	N/A	#N/A	#N/A	#N/A	#N/A	#N/A
dd_Smed_v6_10941_0_212	0	0	0	0	0	0	0	0	0	0	0	0	0	#N/A	N/A	N/A	N/A	N/A	#N/A	#N/A	#N/A	#N/A	#N/A
dd_Smed_v6_10941_0_213	0	0	0	0	0	0	0	0	0	0	0	0	0	#N/A	N/A	N/A	N/A	N/A	#N/A	#N/A	#N/A	#N/A	#N/A
dd_Smed_v6_10941_0_214	20	0	0	0	0	0	20.3126	0	0	0	0	0	3.38544	-7.61373	4.57394	-1.66459	0.0959952	N/A	-195.867	-195.867	NO	NO	NO
dd_Smed_v6_10941_0_215	0	0	0	0	0	0	0	0	0	0	0	0	0	#N/A	N/A	N/A	N/A	N/A	#N/A	#N/A	#N/A	#N/A	#N/A
dd_Smed_v6_10941_0_216	0	0	0	28	0	0	0	0	0	29.1778	0	0	4.86297	7.97431	4.54354	1.75509	0.0792442	N/A	251.482	NO	NO	251.482	NO
dd_Smed_v6_10941_0_217	0	0	0	0	0	0	0	0	0	0	0	0	0	#N/A	N/A	N/A	N/A	N/A	#N/A	#N/A	#N/A	#N/A	#N/A
dd_Smed_v6_10941_0_218	0	0	0	0	0	0	0	0	0	0	0	0	0	#N/A	N/A	N/A	N/A	N/A	#N/A	#N/A	#N/A	#N/A	#N/A
dd_Smed_v6_10941_0_219	0	0	0	4	0	0	0	0	0	4.16826	0	0	0.69471	5.15882	4.61372	1.11815	0.263504	N/A	35.7239	NO	NO	35.7239	NO
dd_Smed_v6_10941_0_22	0	0	0	0	0	0	0	0	0	0	0	0	0	#N/A	N/A	N/A	N/A	N/A	#N/A	#N/A	#N/A	#N/A	#N/A
dd_Smed_v6_10941_0_220	0	0	0	0	0	0	0	0	0	0	0	0	0	#N/A	N/A	N/A	N/A	N/A	#N/A	#N/A	#N/A	#N/A	#N/A
dd_Smed_v6_10941_0_221	0	0	0	0	0	0	0	0	0	0	0	0	0	#N/A	N/A	N/A	N/A	N/A	#N/A	#N/A	#N/A	#N/A	#N/A
dd_Smed_v6_10941_0_222	0	0	0	0	0	0	0	0	0	0	0	0	0	#N/A	N/A	N/A	N/A	N/A	#N/A	#N/A	#N/A	#N/A	#N/A
dd_Smed_v6_10941_0_223	0	0	0	6	0	0	0	0	0	6.25239	0	0	1.04206	5.74687	4.5965	1.25027	0.2112	N/A	53.7007	NO	NO	53.7007	NO
dd_Smed_v6_10941_0_224	0	0	0	0	0	0	0	0	0	0	0	0	0	#N/A	N/A	N/A	N/A	N/A	#N/A	#N/A	#N/A	#N/A	#N/A
dd_Smed_v6_10941_0_225	0	0	0	0	0	0	0	0	0	0	0	0	0	#N/A	N/A	N/A	N/A	N/A	#N/A	#N/A	#N/A	#N/A	#N/A
dd_Smed_v6_10941_0_226	0	0	0	0	0	0	0	0	0	0	0	0	0	#N/A	N/A	N/A	N/A	N/A	#N/A	#N/A	#N/A	#N/A	#N/A
dd_Smed_v6_10941_0_227	0	0	0	0	0	0	0	0	0	0	0	0	0	#N/A	N/A	N/A	N/A	N/A	#N/A	#N/A	#N/A	#N/A	#N/A
dd_Smed_v6_10941_0_228	0	0	0	0	0	0	0	0	0	0	0	0	0	#N/A	N/A	N/A	N/A	N/A	#N/A	#N/A	#N/A	#N/A	#N/A
dd_Smed_v6_10941_0_229	0	0	0	0	0	0	0	0	0	0	0	0	0	#N/A	N/A	N/A	N/A	N/A	#N/A	#N/A	#N/A	#N/A	#N/A
dd_Smed_v6_10941_0_23	0	0	0	0	0	6	0	0	0	0	0	5.11877	0.853128	5.47201	4.60369	1.18862	0.234591	N/A	44.3854	NO	NO	44.3854	NO
dd_Smed_v6_10941_0_230	0	0	0	0	0	0	0	0	0	0	0	0	0	#N/A	N/A	N/A	N/A	N/A	#N/A	#N/A	#N/A	#N/A	#N/A
dd_Smed_v6_10941_0_231	0	0	0	0	0	0	0	0	0	0	0	0	0	#N/A	N/A	N/A	N/A	N/A	#N/A	#N/A	#N/A	#N/A	#N/A
dd_Smed_v6_10941_0_232	0	0	0	0	0	0	0	0	0	0	0	0	0	#N/A	N/A	N/A	N/A	N/A	#N/A	#N/A	#N/A	#N/A	#N/A
[truncated: 39,747 more rows]

## Sheet: DEG (FC <-1.4 & Padj < 0.1)
Gene_ID	gfp-d12-4_Raw.Read.Count	gfp-d12-5_Raw.Read.Count	gfp-d12-6_Raw.Read.Count	pou4-2-d12-4_Raw.Read.Count	pou4-2-d12-5_Raw.Read.Count	pou4-2-d12-6_Raw.Read.Count	gfp-d12-4_Normalized.Read.Count	gfp-d12-5_Normalized.Read.Count	gfp-d12-6_Normalized.Read.Count	pou4-2-d12-4_Normalized.Read.Count	pou4-2-d12-5_Normalized.Read.Count	pou4-2-d12-6_Normalized.Read.Count	baseMean	log2FoldChange	lfcSE	stat	pvalue	padj	FC	FC<-1.4	p value<0.05
dd_Smed_v6_8062_0_1	0	0	75	0	0	0	0	0	92.1181	0	0	0	15.353	-21.5879	4.08199	-5.28856	1.23285e-07	7.53756e-05	-3.15206e+06	-3.15206e+06	1.23285e-07
dd_Smed_v6_2072_0_23	0	0	73	0	0	0	0	0	89.6617	0	0	0	14.9436	-21.5514	4.08911	-5.27042	1.36111e-07	8.10835e-05	-3.07329e+06	-3.07329e+06	1.36111e-07
dd_Smed_v6_7379_0_1	0	0	71	0	0	0	0	0	87.2052	0	0	0	14.5342	-21.4948	4.09655	-5.24705	1.54555e-07	8.97694e-05	-2.95515e+06	-2.95515e+06	1.54555e-07
dd_Smed_v6_8467_0_36	0	0	67	0	0	0	0	0	82.2922	0	0	0	13.7154	-21.4345	4.11248	-5.21207	1.86748e-07	0.000105823	-2.83419e+06	-2.83419e+06	1.86748e-07
dd_Smed_v6_1900_0_6	0	0	66	0	0	0	0	0	81.064	0	0	0	13.5107	-21.4109	4.1167	-5.20098	1.98242e-07	0.000109661	-2.78813e+06	-2.78813e+06	1.98242e-07
dd_Smed_v6_4701_0_2	120	101	104	0	0	0	121.876	93.7383	127.737	0	0	0	57.2252	-11.6904	2.65825	-4.39779	1.09357e-05	0.00348039	-3305.01	-3305.01	1.09357e-05
dd_Smed_v6_4078_0_4	0	127	85	0	0	0	0	117.869	104.401	0	0	0	37.0449	-11.0647	3.1816	-3.47771	0.000505723	0.0638557	-2141.9	-2141.9	0.000505723
dd_Smed_v6_2822_0_2	78	0	96	0	0	0	79.2193	0	117.911	0	0	0	32.8551	-10.8908	3.20054	-3.40281	0.000666977	0.0774793	-1898.75	-1898.75	0.000666977
dd_Smed_v6_12978_0_2	0	78	76	0	0	0	0	72.3919	93.3464	0	0	0	27.6231	-10.6409	3.19972	-3.32559	0.000882315	0.0915126	-1596.77	-1596.77	0.000882315
dd_Smed_v6_3480_0_1	90	12	49	0	0	0	91.4069	11.1372	60.1838	0	0	0	27.1213	-10.6138	2.81283	-3.77335	0.000161068	0.0292351	-1567.01	-1567.01	0.000161068
dd_Smed_v6_11507_0_2	52	41	35	0	0	0	52.8129	38.0522	42.9885	0	0	0	22.3089	-10.3329	2.68528	-3.84797	0.000119099	0.0232567	-1289.76	-1289.76	0.000119099
dd_Smed_v6_11905_0_8	47	43	25	0	0	0	47.7347	39.9084	30.706	0	0	0	19.7249	-10.1579	2.69534	-3.76868	0.00016411	0.0294344	-1142.42	-1142.42	0.00016411
dd_Smed_v6_20159_0_1	20	37	48	0	0	0	20.3126	34.3398	58.9556	0	0	0	18.9347	-10.0928	2.74069	-3.68259	0.000230875	0.0364892	-1092.05	-1092.05	0.000230875
dd_Smed_v6_23127_0_1	31	42	30	0	0	0	31.4846	38.9803	36.8473	0	0	0	17.8854	-10.0144	2.69194	-3.72015	0.000199102	0.0330409	-1034.29	-1034.29	0.000199102
dd_Smed_v6_4244_0_4	24	34	42	0	0	0	24.3752	31.5555	51.5862	0	0	0	17.9195	-10.0131	2.72051	-3.68059	0.000232697	0.0365091	-1033.34	-1033.34	0.000232697
dd_Smed_v6_7366_0_1	37	16	31	0	0	0	37.5784	14.8496	38.0755	0	0	0	15.0839	-9.76514	2.75021	-3.55069	0.000384221	0.0525094	-870.16	-870.16	0.000384221
dd_Smed_v6_10764_0_3	31	41	7	0	0	0	31.4846	38.0522	8.59769	0	0	0	13.0224	-9.56141	2.80427	-3.40959	0.000650603	0.0770344	-755.562	-755.562	0.000650603
dd_Smed_v6_23879_0_1	18	23	13	0	0	0	18.2814	21.3463	15.9671	0	0	0	9.26581	-9.06804	2.74061	-3.30877	0.00093707	0.0926424	-536.724	-536.724	0.00093707
dd_Smed_v6_5620_0_9	2	67	200	0	1	0	2.03126	62.1828	245.648	0	0.934656	0	51.7995	-8.36733	2.01534	-4.15182	3.29837e-05	0.00880815	-330.23	-330.23	3.29837e-05
dd_Smed_v6_3940_0_1	205	358	253	0	3	0	208.205	332.26	310.745	0	2.80397	0	142.336	-8.24179	0.898073	-9.1772	4.42448e-20	1.46848e-16	-302.71	-302.71	4.42448e-20
dd_Smed_v6_3457_0_2	358	371	276	6	0	2	363.596	344.326	338.995	6.25239	0	1.70626	175.813	-7.12006	0.548778	-12.9744	1.70945e-38	1.32385e-34	-139.108	-139.108	1.70945e-38
dd_Smed_v6_2395_0_3	182	115	185	1	3	0	184.845	106.732	227.225	1.04206	2.80397	0	87.1079	-7.10399	0.856959	-8.28977	1.13467e-16	2.63617e-13	-137.567	-137.567	1.13467e-16
dd_Smed_v6_3787_0_4	19	42	21	0	1	0	19.297	38.9803	25.7931	0	0.934656	0	14.1675	-6.48916	1.6097	-4.03129	5.54712e-05	0.01276	-89.8319	-89.8319	5.54712e-05
dd_Smed_v6_30562_0_1	35	25	29	2	0	2	35.5471	23.2025	35.619	2.08413	0	1.70626	16.3598	-4.64819	0.948167	-4.90229	9.47244e-07	0.000400133	-25.0753	-25.0753	9.47244e-07
dd_Smed_v6_6600_0_5	7	61	83	1	6	0	7.10942	56.6142	101.944	1.04206	5.60794	0	28.7196	-4.64152	1.34036	-3.46288	0.000534426	0.0660442	-24.9596	-24.9596	0.000534426
dd_Smed_v6_6610_0_7	59	57	16	0	6	0	59.9223	52.9018	19.6519	0	5.60794	0	23.014	-4.5602	1.29994	-3.50801	0.000451472	0.0595968	-23.5915	-23.5915	0.000451472
dd_Smed_v6_15845_0_3	34	17	52	0	0	6	34.5315	15.7777	63.8686	0	0	5.11877	19.8828	-4.43005	1.34647	-3.29012	0.00100143	0.0954793	-21.5565	-21.5565	0.00100143
dd_Smed_v6_13411_0_1	23	57	16	0	5	0	23.3595	52.9018	19.6519	0	4.67328	0	16.7644	-4.35767	1.3217	-3.29701	0.000977202	0.0945972	-20.5016	-20.5016	0.000977202
dd_Smed_v6_13890_0_3	27	20	27	4	0	0	27.4221	18.562	33.1625	4.16826	0	0	13.8858	-4.31869	1.25723	-3.43508	0.000592369	0.072055	-19.9552	-19.9552	0.000592369
dd_Smed_v6_101_0_4	442	231	126	0	35	21	448.909	214.391	154.758	0	32.713	17.9157	144.781	-4.01014	1.00387	-3.99468	6.47808e-05	0.0144717	-16.1129	-16.1129	6.47808e-05
dd_Smed_v6_9974_1_7	145	118	131	11	24	0	147.267	109.516	160.9	11.4627	22.4317	0	75.2628	-3.62794	0.979221	-3.70492	0.000211458	0.0341167	-12.3628	-12.3628	0.000211458
dd_Smed_v6_19322_0_1	55	75	48	8	3	6	55.8598	69.6076	58.9556	8.33652	2.80397	5.11877	33.447	-3.52338	0.540343	-6.52065	7.00044e-11	7.39278e-08	-11.4986	-11.4986	7.00044e-11
dd_Smed_v6_6587_0_7	35	60	19	6	6	0	35.5471	55.6861	23.3366	6.25239	5.60794	0	21.0717	-3.2973	0.977484	-3.37326	0.000742849	0.0814085	-9.83076	-9.83076	0.000742849
dd_Smed_v6_15626_0_1	105	104	87	12	15	7	106.641	96.5226	106.857	12.5048	14.0198	5.9719	57.0862	-3.26853	0.411428	-7.94435	1.95213e-15	3.23957e-12	-9.63664	-9.63664	1.95213e-15
dd_Smed_v6_39713_0_1	42	54	29	5	6	5	42.6565	50.1175	35.619	5.21032	5.60794	4.26564	23.9128	-3.09876	0.556408	-5.56923	2.55868e-08	1.81832e-05	-8.56684	-8.56684	2.55868e-08
dd_Smed_v6_13975_0_1	317	329	233	51	52	35	321.955	305.345	286.18	53.1453	48.6021	29.8595	174.181	-2.80491	0.261863	-10.7113	9.00538e-27	3.48703e-23	-6.98812	-6.98812	9.00538e-27
dd_Smed_v6_12316_0_3	50	119	67	20	14	6	50.7816	110.444	82.2922	20.8413	13.0852	5.11877	47.0939	-2.65536	0.620768	-4.27753	1.88974e-05	0.00528969	-6.30003	-6.30003	1.88974e-05
dd_Smed_v6_4701_0_3	69	98	90	31	13	10	70.0786	90.954	110.542	32.304	12.1505	8.53128	54.0934	-2.37002	0.584902	-4.052	5.07818e-05	0.0123844	-5.16949	-5.16949	5.07818e-05
dd_Smed_v6_7545_0_1	399	416	370	74	77	118	405.237	386.09	454.449	77.1128	71.9685	100.669	249.255	-2.31287	0.200008	-11.5638	6.28284e-31	3.44365e-27	-4.96869	-4.96869	6.28284e-31
dd_Smed_v6_39721_0_1	22	24	24	6	3	8	22.3439	22.2744	29.4778	6.25239	2.80397	6.82502	14.9963	-2.21646	0.647657	-3.42227	0.00062101	0.0751455	-4.6475	-4.6475	0.00062101
dd_Smed_v6_3457_0_4	506	517	366	128	105	147	513.91	479.829	449.537	133.384	98.1389	125.41	300.035	-2.01764	0.174692	-11.5497	7.41111e-31	3.44365e-27	-4.0492	-4.0492	7.41111e-31
dd_Smed_v6_8247_0_8	80	106	66	42	23	14	81.2506	98.3788	81.064	43.7667	21.4971	11.9438	56.3168	-1.76656	0.533811	-3.30933	0.000935202	0.0926424	-3.40241	-3.40241	0.000935202
dd_Smed_v6_11905_0_3	98	265	341	77	87	78	99.5319	245.947	418.83	80.239	81.3151	66.544	165.401	-1.74362	0.516747	-3.37422	0.00074024	0.0814085	-3.34874	-3.34874	0.00074024
dd_Smed_v6_8129_0_3	131	241	118	28	95	56	133.048	223.673	144.933	29.1778	88.7923	47.7752	111.233	-1.59678	0.481719	-3.31476	0.000917226	0.0926424	-3.02468	-3.02468	0.000917226
dd_Smed_v6_2381_0_2	274	415	262	93	130	185	278.283	385.162	321.799	96.912	121.505	157.829	226.915	-1.38598	0.258568	-5.36019	8.31337e-08	5.22012e-05	-2.61349	-2.61349	8.31337e-08
dd_Smed_v6_593_1_16	431	632	464	186	239	298	437.737	586.56	569.904	193.824	223.383	254.232	377.607	-1.24534	0.192708	-6.4623	1.03121e-10	1.04166e-07	-2.37074	-2.37074	1.03121e-10
dd_Smed_v6_11764_0_3	110	115	76	39	57	67	111.72	106.732	93.3464	40.6405	53.2754	57.1596	77.1455	-1.04239	0.273496	-3.81135	0.000138211	0.0262894	-2.05964	-2.05964	0.000138211
dd_Smed_v6_6495_0_2	172	219	147	117	111	95	174.689	203.254	180.552	121.922	103.747	81.0471	144.202	-0.869861	0.235686	-3.69077	0.000223579	0.0358236	-1.82749	-1.82749	0.000223579
dd_Smed_v6_8966_0_1	150	171	112	87	83	100	152.345	158.705	137.563	90.6596	77.5765	85.3128	117.027	-0.826925	0.204468	-4.04428	5.24852e-05	0.0123844	-1.7739	-1.7739	5.24852e-05
dd_Smed_v6_1139_0_12	219	315	197	113	178	181	222.423	292.352	241.964	117.753	166.369	154.416	199.213	-0.786121	0.22567	-3.4835	0.000494896	0.0637501	-1.72443	-1.72443	0.000494896
dd_Smed_v6_924_0_3	161	174	162	118	105	108	163.517	161.49	198.975	122.964	98.1389	92.1378	139.537	-0.742886	0.225971	-3.28753	0.00101071	0.0954793	-1.67352	-1.67352	0.00101071
dd_Smed_v6_490_0_4	615	711	481	337	337	557	624.614	659.88	590.784	351.176	314.979	475.192	502.771	-0.715495	0.19043	-3.75726	0.000171784	0.0302353	-1.64205	-1.64205	0.000171784
dd_Smed_v6_1014_0_1	310	327	279	193	205	225	314.846	303.489	342.679	201.118	191.604	191.954	257.615	-0.715471	0.137729	-5.19478	2.04964e-07	0.000110743	-1.64202	-1.64202	2.04964e-07
dd_Smed_v6_51_0_1	4785	4973	3834	3118	2980	3060	4859.8	4615.45	4709.08	3249.16	2785.27	2610.57	3804.89	-0.714889	0.0944385	-7.56989	3.73535e-14	5.78556e-11	-1.64136	-1.64136	3.73535e-14
dd_Smed_v6_1045_0_1	628	743	507	486	366	408	637.817	689.58	622.719	506.443	342.084	348.076	524.453	-0.706728	0.194076	-3.64151	0.000271044	0.041158	-1.6321	-1.6321	0.000271044
dd_Smed_v6_34_0_1	2898	3326	2583	2421	1660	1947	2943.3	3086.87	3172.55	2522.84	1551.53	1661.04	2489.69	-0.68256	0.189141	-3.60873	0.000307696	0.0437194	-1.60499	-1.60499	0.000307696
dd_Smed_v6_793_0_1	1658	1848	1365	1363	957	1008	1683.92	1715.13	1676.55	1420.33	894.466	859.953	1375.06	-0.677731	0.206157	-3.28746	0.00101097	0.0954793	-1.59962	-1.59962	0.00101097
dd_Smed_v6_3976_0_2	179	180	141	117	109	121	181.798	167.058	173.182	121.922	101.878	103.228	141.511	-0.677213	0.188101	-3.60027	0.000317887	0.0444908	-1.59905	-1.59905	0.000317887
dd_Smed_v6_3845_0_1	208	232	175	141	123	165	211.251	215.32	214.942	146.931	114.963	140.766	174.029	-0.672723	0.180216	-3.73287	0.000189313	0.0321045	-1.59408	-1.59408	0.000189313
dd_Smed_v6_2205_0_6	405	392	326	246	212	331	411.331	363.816	400.407	256.348	198.147	282.385	318.739	-0.672677	0.184957	-3.63693	0.000275912	0.041625	-1.59403	-1.59403	0.000275912
dd_Smed_v6_24_0_1	12030	13594	9596	7694	8445	9213	12218.1	12616.6	11786.2	8017.65	7893.17	7859.87	10065.3	-0.623942	0.0397975	-15.6779	2.14153e-55	2.48771e-51	-1.54108	-1.54108	2.14153e-55
dd_Smed_v6_490_0_18	403	540	355	331	304	290	409.3	501.175	436.026	344.923	284.135	247.407	370.494	-0.622279	0.184315	-3.37617	0.000735037	0.0814085	-1.5393	-1.5393	0.000735037
dd_Smed_v6_658_0_1	1251	1332	965	846	896	806	1270.56	1236.23	1185.25	881.587	837.452	687.621	1016.45	-0.61893	0.121511	-5.09359	3.51337e-07	0.000170054	-1.53574	-1.53574	3.51337e-07
dd_Smed_v6_24_0_2	9316	10282	7730	6013	6682	7185	9461.63	9542.74	9494.31	6265.93	6245.37	6129.72	7856.62	-0.612705	0.0291146	-21.0446	2.56147e-98	5.95105e-94	-1.52912	-1.52912	2.56147e-98
dd_Smed_v6_6878_0_1	190	219	167	116	148	163	192.97	203.254	205.116	120.88	138.329	139.06	166.602	-0.591759	0.168435	-3.51329	0.000442601	0.0590974	-1.50708	-1.50708	0.000442601
dd_Smed_v6_5978_0_2	731	588	639	442	488	560	742.427	545.724	784.847	460.593	456.112	477.752	577.909	-0.570291	0.171716	-3.32113	0.000896524	0.0917575	-1.48482	-1.48482	0.000896524
dd_Smed_v6_53_0_1	17322	18631	13695	12420	12110	13182	17592.8	17291.5	16820.8	12942.4	11318.7	11245.9	14535.3	-0.542415	0.0679349	-7.98434	1.41281e-15	2.52491e-12	-1.45641	-1.45641	1.41281e-15
dd_Smed_v6_465_0_1	622	626	493	463	452	409	631.723	580.992	605.523	482.476	422.465	348.929	512.018	-0.537931	0.156312	-3.44138	0.000578746	0.0707685	-1.45189	-1.45189	0.000578746
dd_Smed_v6_288_0_1	4053	5053	3449	3134	3082	3371	4116.36	4689.7	4236.21	3265.83	2880.61	2875.89	3677.43	-0.532261	0.0859117	-6.19544	5.81215e-10	5.1936e-07	-1.44619	-1.44619	5.81215e-10
dd_Smed_v6_4528_0_3	355	424	297	247	271	322	360.549	393.515	364.788	257.39	253.292	274.707	317.374	-0.510741	0.124544	-4.10088	4.11582e-05	0.0103938	-1.42478	-1.42478	4.11582e-05
dd_Smed_v6_1588_0_1	432	462	333	324	291	339	438.753	428.783	409.005	337.629	271.985	289.21	362.561	-0.508695	0.138786	-3.66531	0.000247042	0.0380101	-1.42276	-1.42276	0.000247042
dd_Smed_v6_68_0_1	14642	14692	13204	11357	10403	11672	14870.9	13635.7	16217.7	11834.7	9723.23	9957.71	12706.7	-0.504985	0.101616	-4.96952	6.71199e-07	0.000294226	-1.41911	-1.41911	6.71199e-07
